# Supplementary material for: Systematic literature review informing the EULAR recommendations for the non-pharmacological management of systemic lupus erythematosus and systemic sclerosis
Source: PubMed Central journal article supplement — RMD Open. 2023 Aug 2;9(3):e003297. doi: 10.1136/rmdopen-2023-003297 (PMC10401222; doi:10.1136/rmdopen-2023-003297), 2023-08-02
Supplement: rmdopen-2023-003297supp004.pdf [file rmdopen-2023-003297supp004.pdf]

## Supplemental Table S1

## RESEARCH QUESTION 1: WHAT SHOULD NON-PHARMACOLOGICAL MANAGEMENT AIM FOR?

| Intervention/management strategy                                                                                                                                                                                                                     | Comparator                      | N                               | Aim of management                                                                                                                            | SD&OA* | Reference                |
|------------------------------------------------------------------------------------------------------------------------------------------------------------------------------------------------------------------------------------------------------|---------------------------------|---------------------------------|----------------------------------------------------------------------------------------------------------------------------------------------|--------|--------------------------|
| <b>SLE</b>                                                                                                                                                                                                                                           |                                 |                                 |                                                                                                                                              |        |                          |
| <b>Physical exercise and physical activity</b>                                                                                                                                                                                                       |                                 |                                 |                                                                                                                                              |        |                          |
| P: Phase I: supervised aerobic exercise at 70-80% of maximum heart rate.<br><br>Phase II: continue exercise in the supervised setting for 1 month/ unsupervised home exercise programme for 6 months.<br><br>C: Range of motion/muscle strengthening | Other SLE patients              | Intervention: 5<br>Control: 5   | 1ry: improvement of fatigue and functional status.; 2ry: bone mineral density and biomechanical markers.                                     | 11; W  | Ramsey-Goldman, 2000 [1] |
| P: Exercise group= exercise (walking, cycling, and swimming)<br><br>Relaxation group= listen to a relaxation audiotape in a darkened, warm, and quiet room<br><br>C: Relaxation group: listen to relaxation audiotape                                | Other SLE patients              | Intervention: 62<br>Control: 32 | 1ry: improvement of fatigue.; 2ry: quality of sleep, functional status, disease activity, anxiety and depression, aerobic capacity.          | 11; I  | Tench, 2003 [2]          |
| P: Supervised aerobic exercise: incremental load on a treadmill<br><br>C: Usual care                                                                                                                                                                 | Other SLE patients              | Intervention: 41<br>Control: 19 | 1ry: improvement in functional ability, fatigue, depression, HRQoL, pain.; 2ry: aerobic capacity                                             | 10; I  | Carvalho, 2005 [3]       |
| P: Supervised aerobic exercise: walking on a treadmill for a 3-month programme<br><br>C: N/A: intraindividual assessment                                                                                                                             | N/A; intraindividual assessment | Intervention: 6<br>Control: -   | 1ry: changes in disease activity, fatigue, and pain.; 2ry: erythrocyte sedimentation rate (ESR), C-reactive protein (CRP), aerobic capacity. | 10; R  | Clarke-Jenssen, 2005 [4] |
| P: Cardiorespiratory exercise test carried out on a treadmill<br><br>C: No                                                                                                                                                                           | Healthy controls                | Intervention: 20<br>Control: 20 | 1ry: evaluation of aerobic capacity.                                                                                                         | 1; R   | do Prado, 2011 [5]       |
| P: Program of increasing exercise from 100 to 300 min/week (combined with reduced-calorie diet)<br><br>C: N/A: intraindividual assessment                                                                                                            | N/A; intraindividual assessment | Intervention: 15<br>Control: -  | 1ry: change in weight /BMI, waist circumference, self-reported physical activity                                                             | 10; W  | Otto, 2011 [6]           |
| P: Home exercise program using Wii Fit interactive video game for 10 weeks<br><br>C: N/A: intraindividual assessment                                                                                                                                 | N/A; intraindividual assessment | Intervention: 15<br>Control: -  | 1ry: improvement in fatigue.; 2ry: body weight, waist circumference, physical activity level, anxiety and depression, sleep quality, pain.   | 10; R  | Yuen, 2011 [7]           |
| P: Supervised training sessions: 35-40 minutes of resistance, 30 minutes of treadmill aerobic training, and 5 minutes of stretching exercises.<br><br>C: Usual care                                                                                  | Other SLE patients              | Intervention: 14<br>Control: 10 | 1ry: chronotropic reserve (CR); Heart rate recovery (absolute change)                                                                        | 11; W  | Miossi, 2012 [8]         |
| P: Ergospirometric test<br><br>C: No                                                                                                                                                                                                                 | Healthy controls                | Intervention: 27<br>Control: 30 | 1ry: changes in levels of IL-6, IL-10 and TNF-a.                                                                                             | 10; I  | da Silva, 2013 [9]       |
| P: Supervised walking at a heart rate corresponding to the VT1 threshold.<br><br>C: Usual care                                                                                                                                                       | Other SLE patients              | Intervention: 18<br>Control: 20 | 1ry: Effects on endothelial function, aerobic capacity, disease activity                                                                     | 10; R  | dos Reis-Neto, 2013 [10] |

| Intervention/management strategy                                                                                                                                                                            | Comparator                           | N                                      | Aim of management                                                                                 | SD&OA* | Reference             |
|-------------------------------------------------------------------------------------------------------------------------------------------------------------------------------------------------------------|--------------------------------------|----------------------------------------|---------------------------------------------------------------------------------------------------|--------|-----------------------|
| P: Walking, running, cycling, or use of an elliptical machine.<br>C: No                                                                                                                                     | Other SLE patients, healthy controls | Intervention: 14<br>Control: 12        | 1ry: improvements in vascular function;<br>2ry: inflammatory markers, disease activity            | 1; I   | Barnes, 2014 [11]     |
| P: Treadmill walking<br>C: No                                                                                                                                                                               | Healthy controls                     | Intervention: 8<br>Control: 10         | 1ry: effects on levels of cytokines (IFN-gamma, IL-6, IL-10, TNF-alfa) and sTNFR                  | 10; I  | Perandini, 2014 [12]  |
| P: Seven strength exercises for the major muscle groups followed by aerobic exercise on a treadmill.<br>C: Usual care                                                                                       | Other SLE patients, healthy controls | Intervention: 17<br>Control: 16        | 1ry: effects on lipid profile.;                                                                   | 11; W  | Benatti, 2015 [13]    |
| P: Aerobic training on a bicycle ergometer, for 6 weeks.<br>C: N/A: intraindividual assessment                                                                                                              | N/A; intraindividual assessment      | Intervention: 30<br>Control: 30        | 1ry: changes in HRQoL.; 2ry: depression, fatigue                                                  | 11; W  | Bogdanovic, 2015 [14] |
| P: Two single bouts of acute aerobic exercise (moderate and intense) performed in a treadmill<br>C: No                                                                                                      | Other SLE patients, healthy controls | Intervention: 23<br>Control: 10        | 1ry: effects on levels of INF-γ, IL-10, IL-6, TNF-α and soluble TNF receptors (sTNFR1 and sTNFR2) | 10; I  | Perandini, 2015 [15]  |
| P: Walking and bicycle vs free weight and elastic bands exercises 3 times/week for 12 weeks<br>C: Usual care                                                                                                | Other SLE patients                   | Intervention: 21<br>Control: 21        | 1ry: improvement in HRQoL.; 2ry: depression, disease activity, aerobic capacity.                  | 11; I  | Abraham, 2016 [16]    |
| P: Endurance exercises (walking or bicycle) + strengthening exercises (with elastoband or weights for both upper and lower limbs)<br>C: Usual care                                                          | Other SLE patients                   | Intervention: 15<br>Control: 18        | 1ry: changes in fatigue; 2ry: physical working capacity, perception of exertion.                  | 11; W  | Avaux, 2016 [17]      |
| P: 0 to 3 months: high + low-moderate intensity aerobic exercise + education+ individual coaching.<br>4 to 12 months: high + low-moderate intensity aerobic exercise + individual coaching<br>C: Usual care | Other SLE patients                   | Intervention: 18<br>Control: 17        | 1ry: aerobic capacity; 2ry: physical activity, HRQoL, disease activity, organ damage              | 11; I  | Bostrom, 2016 [18]    |
| P: Single bout of acute aerobic exercise performed 72 hours after a cardiopulmonary exercise test to determine VAT and RCP<br>C: No                                                                         | Other SLE patients, healthy controls | Intervention: 8<br>Control: 4          | 1ry: modulation of immune-related gene expression;                                                | 10; I  | Perandini, 2016 [19]  |
| P: Various modalities: aerobic exercise programme, resistance training, multi-component interventions.<br>C: N/A                                                                                            | N/A                                  | 6 RCTs and 5 quasi-RCTs                | 1ry: changes in disease activity, fatigue, aerobic capacity, and depression.                      | 12; R  | O'Dwyer, 2017 [20]    |
| P: Aerobic exercise (treadmill, walking/cycling/swimming)<br>C: N/A                                                                                                                                         | N/A                                  | 3 studies: 2 RCT, 1 quasi-experimental | 1ry: improvement of fatigue                                                                       | 12; R  | Wu, 2017 [21]         |
| P: Supervised treadmill aerobic training<br>C: No                                                                                                                                                           | Other SLE patients                   | Intervention: 9<br>Control: 10         | 1ry: changes in insulin sensitivity; 2ry: body weight, aerobic capacity                           | 11; W  | Benatti, 2018 [22]    |
| P: Hatha yoga classes (deep breathing, relaxation, meditation, poses for strength, flexibility, and balance) + encouragement to home practice for 8 weeks<br>C: N/A: intraindividual assessment             | N/A; intraindividual assessment      | Intervention: 7<br>Control: -          | 1ry: increasing of body awareness, benefits (flexibility, less fatigue, relaxation, enjoyment)    | 9; W   | Middleton, 2018 [23]  |

| Intervention/management strategy                                                                                                                                                                  | Comparator                      | N                                                    | Aim of management                                                                                                                                                                                                                                                                   | SD&OA* | Reference                    |
|---------------------------------------------------------------------------------------------------------------------------------------------------------------------------------------------------|---------------------------------|------------------------------------------------------|-------------------------------------------------------------------------------------------------------------------------------------------------------------------------------------------------------------------------------------------------------------------------------------|--------|------------------------------|
| P: Aerobic exercise on a treadmill<br>C: Guidelines about healthy lifestyle                                                                                                                       | Other SLE patients              | Intervention: 26<br>Control: 32                      | 1ry: cardiovascular risk (arterial stiffness);<br>2ry: inflammation, oxidative stress (cardiovascular risk), cardiorespiratory fitness;                                                                                                                                             | 10; I  | Soriano-Maldonado, 2018 [24] |
| P: Kinesiotherapy protocol for 4 months<br>C: Usual care                                                                                                                                          | Other SLE patients              | Intervention: 5<br>Control: 9                        | 1ry: differences in the serum levels of cytokines (IL-2, IL-5, IL-6, IL-8, IL-10 and TNF-a) and the numbers of CD11b+ and CXCR2+ neutrophils and lymphocytes;<br>2ry: disease activity, HRQoL, body 2circumferences, percentage of body fat, f15exibility tests, muscular strength. | 10; R  | Timoteo, 2018 [25]           |
| P: Aerobic exercise<br>C: N/A                                                                                                                                                                     | N/A                             | 2 RCTs                                               | 1ry: changes in SF-36 subscale scores                                                                                                                                                                                                                                               | 12; R  | da Hora, 2019 [26]           |
| P: Walk With Ease (WWE) programme<br>C: Did not complete intervention                                                                                                                             | Other SLE patients              | Intervention: 48<br>Control: 27                      | 1ry: changes in pain, stiffness, fatigue;                                                                                                                                                                                                                                           | 10; I  | Sheikh, 2019 [27]            |
| P: Wearing of pedometer + face-to-face physical activity counselling + follow up phone calls<br>C: Usual care                                                                                     | Other SLE patients              | Intervention: 38<br>Control: 38                      | 1ry: changes in fatigue, quality of sleep, HR2QoL                                                                                                                                                                                                                                   | 11; I  | Wu, 2019 [28]                |
| P: Moderate to vigorous intensity aerobic exercise<br>C: Physical activity guidelines and basic nutritional information                                                                           | Other SLE patients              | Intervention: 26<br>Control: 32                      | 1ry: stress, quality of sleep, fatigue, depression, HRQoL; ;                                                                                                                                                                                                                        | 10; I  | Gavilan-Carrera, 2020 [29]   |
| P: Strengthening and stretching upper limb exercises<br>C: Four sessions of training in alternative methods of performing daily activities, use of aids, joint protection and energy conservation | Other SLE patients              | Intervention: 31<br>Control: 27                      | 1ry: changes in DASH (Disabilities of the Arm, Shoulder and Hand) score.; 2ry: changes in pain, grip and pinch strength, Purdue test and HRQoL, functional ability                                                                                                                  | 11; W  | Keramiotou, 2020 [30]        |
| P: Whole body vibration exercises (WBVE)<br>C: Whole body vibration exercise                                                                                                                      | Healthy controls                | Intervention: 18<br>Control: 9                       | 1ry: increase in muscle activation                                                                                                                                                                                                                                                  | 11; I  | Dionello, 2021 [31]          |
| P: Home-based moderate-intensity aerobic exercise and resistance training.<br>C: Usual care                                                                                                       | Other SLE patients              | Intervention: 12<br>Control: 11                      | 1ry: changes in physical fitness, executive functions; 2ry: disease activity, body composition                                                                                                                                                                                      | 10; I  | Kao, 2021 [32]               |
| P: Whole body vibration exercises (WBVE)<br>C: Isometry training programme                                                                                                                        | Other SLE patients              | Intervention: 11<br>Control: 10                      | 1ry: fatigue, functional ability, HRQoL;                                                                                                                                                                                                                                            | 11; W  | Lopes-Souza, 2021 [33]       |
| P: No intervention.<br>Exposure: sedentary behaviour, as per one item from the Rapid Assessment of Physical Activity (RAPA).<br>C: Self-reported physical activity                                | Other SLE patients              | Intervention: 41<br>Control: 184                     | 1ry: improvement of depression.; 2ry: disease activity, organ damage.                                                                                                                                                                                                               | 5; R   | Patterson, 2021 [34]         |
| <b>Patient education and self-management</b>                                                                                                                                                      |                                 |                                                      |                                                                                                                                                                                                                                                                                     |        |                              |
| P: Attend a self-management course<br>C: Usual care                                                                                                                                               | Other SLE patients              | Intervention: 21<br>Control: 20                      | 1ry: changes in fatigue, coping skills, self-efficacy, depression, pain, disease activity;                                                                                                                                                                                          | 10; I  | Sohng, 2003 [35]             |
| P: Educational programme<br>C: Educational programme                                                                                                                                              | S5c patients                    | Intervention: 5 with S5c, 5 with SLE<br>Control: N/A | Improvement of patient education                                                                                                                                                                                                                                                    | 9; R   | Brown, 2004 [36]             |
| P: Attend a psychoeducational group combining functional strategy training and psychosocial support (MINDFULL program)<br>C: N/A: intraindividual assessment                                      | N/A; intraindividual assessment | Intervention: 17<br>Control: -                       | 1ry: improvement in metamemory; 2ry: organ damage, depression                                                                                                                                                                                                                       | 10; I  | Harrison, 2005 [37]          |

| Intervention/management strategy                                                                                                                                                                            | Comparator                         | N                               | Aim of management                                                                                                          | SD&OA* | Reference            |
|-------------------------------------------------------------------------------------------------------------------------------------------------------------------------------------------------------------|------------------------------------|---------------------------------|----------------------------------------------------------------------------------------------------------------------------|--------|----------------------|
| P: Take part in a patient education program<br>C: N/A: intraindividual assessment                                                                                                                           | N/A;<br>intraindividual assessment | Intervention: 13<br>Control: -  | 1ry: improvement in patient satisfaction and awareness; 2ry: pain, HRQoL, fatigue, physical well-being                     | 9; R   | Miljeteig, 2009 [38] |
| P: Attend the Chronic Disease Self-Management Program (CDSMP)<br>C: N/A: intraindividual assessment                                                                                                         | N/A;<br>intraindividual assessment | Intervention: 45<br>Control: -  | 1ry: changes in health status, self-efficacy, self-management behaviours, health services utilization.;                    | 10; I  | Drenkard, 2012 [39]  |
| P: Education regarding SLE and its management including lifestyle modifications<br>C: Usual care                                                                                                            | Other SLE patients                 | Intervention: 21<br>Control: 20 | 1ry: medication knowledge and adherence                                                                                    | 11; W  | Ganachari, 2012 [40] |
| P: Standardised daily cellular text message reminders (CTMR) for HCQ intake as prescribed + printed information sheet<br>C: Usual care                                                                      | Other SLE patients                 | Intervention: 19<br>Control: 22 | 1ry: improvement in medication adherence to; HCQ, adherence to visits; 2ry: disease activity; ; ;                          | 11; W  | Ting, 2012 [41]      |
| P: Take part in BLESS (Balancing Lupus Experience with Stress Strategies) study<br>C: Usual care                                                                                                            | Other SLE patients                 | Intervention: 15<br>Control: 15 | 1ry: changes in health distress, self-efficacy, depression, HRQoL, anxiety                                                 | 11; W  | Williams, 2014 [42]  |
| P: 0 to 3 months: high + low-moderate intensity aerobic exercise + education+ individual coaching.<br>4 to 12 months: high + low-moderate intensity aerobic exercise + individual coaching<br>C: Usual care | Other SLE patients                 | Intervention: 18<br>Control: 17 | 1ry: aerobic capacity; 2ry: physical activity, HRQoL, disease activity, organ damage                                       | 11; I  | Bostrom, 2016 [18]   |
| P: 3 phases targeted nursing<br>C: Regular specific nursing                                                                                                                                                 | Other SLE patients                 | Intervention: 58<br>Control: 58 | 1ry: changes in medication adherence, disease activity, organ damage, quality of life                                      | 11; W  | Zhang, 2016 [43]     |
| P: Take part in FAME (Fatigue and Activity Management Education) = 1 h group education / 1 h individual goal<br>C: N/A: intraindividual assessment                                                          | N/A;<br>intraindividual assessment | Intervention: 21<br>Control: -  | 1ry: changes in fatigue, occupational participation, mood, self-efficacy, HRQoL;                                           | 10; I  | O'Riordan, 2017 [44] |
| P: 3-year CVD prevention counselling program<br>C: N/A: intraindividual assessment                                                                                                                          | N/A;<br>intraindividual assessment | Intervention: 121<br>Control: - | 1ry: changes in CV risk                                                                                                    | 10; I  | Yelnik, 2017 [45]    |
| P: Session of mentoring<br>C: N/A: intraindividual assessment                                                                                                                                               | N/A;<br>intraindividual assessment | Intervention: 36<br>Control: -  | 1ry: changes in self-care agency, self-care activity, HRQoL                                                                | 10; I  | Kusnanto, 2018 [46]  |
| P: Follow a web-based educational program + answer module questions on an online social media forum with other participants<br>C: Usual care                                                                | Other SLE patients                 | Intervention: 13<br>Control: 14 | 1ry: changes in medication adherence, stress, self-efficacy, quality of life, SOA, SOC, empowerment                        | 11; W  | Scalzi, 2018 [47]    |
| P: Receive education and support by a peer-to-peer mentoring<br>C: N/A: intraindividual assessment                                                                                                          | N/A;<br>intraindividual assessment | Intervention: 23<br>Control: -  | 1ry: HRQoL, self-management, and disease activity; 2ry: treatment credibility, satisfaction with care or service delivery; | 10; I  | Williams, 2018 [48]  |
| P: To be enrolled in the Peer Approaches to Lupus Self-management (PALS) program<br>C: N/A: intraindividual assessment                                                                                      | N/A;<br>intraindividual assessment | Intervention: 20<br>Control: -  | 1ry: HRQoL, self-management, disease activity, depression, anxiety                                                         | 10; I  | Williams, 2019 [49]  |
| P: Use of SimpleMed+ pillbox to organise and administer medication + receiving digital reminders during 2° month<br>C: Usual care                                                                           | Other SLE patients                 | Intervention: 8<br>Control: 11  | 1ry: improvement of medication adherence                                                                                   | 11; W  | Harry, 2020 [50]     |

| Intervention/management strategy                                                                                                                                                               | Comparator         | N                                  | Aim of management                                                                                                    | SD&OA* | Reference                      |
|------------------------------------------------------------------------------------------------------------------------------------------------------------------------------------------------|--------------------|------------------------------------|----------------------------------------------------------------------------------------------------------------------|--------|--------------------------------|
| P: Web-based education programme (3 months) followed by telephone counselling by physicians (3 months)<br>C: Usual care                                                                        | Other SLE patients | Intervention: 40<br>Control: 40    | 1ry: changes in fatigue and self-efficacy.                                                                           | 11; W  | Kankaya, 2020 [51]             |
| P: App for self-tracking lifestyle activities and symptoms, and weekly telehealth coaching sessions<br>C: Usual care                                                                           | Other SLE patients | Intervention: 25<br>Control: 22    | 1ry: improvements in fatigue, HRQoL and pain; 2ry: adherence to app and coaching sessions.                           | 11; W  | Khan, 2020 [52]                |
| P: PainTRAINER: 8 weeks, automated, internet-based version of pain coping skills training programme<br>C: Usual care                                                                           | Other SLE patients | Intervention: 30<br>Control: 30    | 1ry: HRQoL, pain; 2ry: coping skills                                                                                 | 11; W  | Allen, 2021 [53]               |
| P: Follow the Chronic Disease Self-Management Program (CDSMP)<br>C: Usual care                                                                                                                 | Other SLE patients | Intervention: 24<br>Control: -     | 1ry. Changes in self-efficacy, patient activation, disease activity                                                  | 11; W  | White, 2021 [54]               |
| <b>Psychological interventions</b>                                                                                                                                                             |                    |                                    |                                                                                                                      |        |                                |
| P: Enrolled in a Brief Supportive–Expressive Group Psychotherapy + “booster sessions” for 3 months<br>C: Usual care                                                                            | Other SLE patients | Intervention: 64<br>Control: 64    | 1ry: reduction of psychological distress, improvement of HRQoL, disease activity, health service utilization;        | 11; I  | Dobkin, 2002 [55]              |
| P: Enrolled in a Brief Supportive–Expressive Group Psychotherapy + “booster sessions” for 3 months<br>C: Usual care                                                                            | Other SLE patients | Intervention: 58<br>Control: 66    | 1ry: changes in disease activity, organ damage, illness intrusiveness, psychological distress;                       | 11; W  | Edworthy, 2003 [56]            |
| P: Receive biofeedback-assisted cognitive behavioural treatment (BF/CBT)<br>C: Usual care                                                                                                      | Other SLE patients | Intervention: 32<br>Control: 27+33 | 1ry: changes in physical functioning, pain,; psychological adaptation; 2ry: disease status                           | 11; I  | Greco, 2004 [57]               |
| P: Discussion between educator, patient, and partner, after a regular visit for medical care + telephone follow up<br>C: 45-minute video presentation about lupus, and monthly telephone calls | Other SLE patients | Intervention: 64<br>Control: 58    | 1ry: improvement of self-efficacy, partner support, problem-solving skills; 2ry: health status disease activity      | 11; W  | Karlson, 2004 [58]             |
| P: Application of the Cognitive-Behaviour Therapy based on the Chronic Illness Self-Management Course<br>C: Usual care                                                                         | Other SLE patients | Intervention: 11<br>Control: 22    | 1ry: changes illness representations.; 2ry: changes in anxiety/depression, dysfunctional cognition, physical health. | 10; I  | Goodman, 2005 [59]             |
| P: Group session focused on psychoeducative and psychotherapeutic elements<br>C: Same intervention 6 months later (waiting group)                                                              | Other SLE patients | Intervention: 26<br>Control: 8     | 1ry: improvement of coping ability; 2ry: changes in disease activity, HRQoL                                          | 10; I  | Haupt, 2005 [60]               |
| P: Enrolled in a psychosocial group program organized by Community Rehabilitation Network<br>C: Usual care                                                                                     | Other SLE patients | Intervention: 56<br>Control: 20    | 1ry: improvement in psychological distress, HRQoL and self-esteem.                                                   | 10; R  | Ng, 2007 [61]                  |
| P: Attend 10 Cognitive-Behaviour Therapy sessions<br>C: General recommendations about health lifestyle                                                                                         | Other SLE patients | Intervention: 21<br>Control: 24    | 1ry: changes in disease activity, psychological variables (stress, depression and anxiety), HRQoL                    | 11; W  | Navarrete-Navarrete, 2010 [62] |
| P: Attend 10 Cognitive-Behaviour Therapy sessions<br>C: General recommendations about health lifestyle                                                                                         | Other SLE patients | Intervention: 18<br>Control: 16    | 1ry: changes in HRQoL domains                                                                                        | 11; W  | Navarrete-Navarrete, 2010 [63] |

| Intervention/management strategy                                                                                                                                                                                                                    | Comparator                         | N                                   | Aim of management                                                                    | SD&OA* | Reference            |
|-----------------------------------------------------------------------------------------------------------------------------------------------------------------------------------------------------------------------------------------------------|------------------------------------|-------------------------------------|--------------------------------------------------------------------------------------|--------|----------------------|
| P: Follow three separate CBT modules preinstalled on a CD ROM<br>C: Educational sessions<br>usual care                                                                                                                                              | Other SLE patients                 | Intervention: 27<br>Control: 10 +16 | 1ry: changes in pain, behaviour, self-perception, self-efficacy, HRQoL               | 11; W  | Brown, 2012 [64]     |
| P: Cognitive-Behaviour Therapy sessions, supportive therapy, multiple psychological interventions, psychoeducational intervention.<br>C: N/A                                                                                                        | N/A                                | 6 RCTs                              | 1ry: HRQoL, disease activity                                                         | 12; R  | Zhang, 2012 [65]     |
| P: Follow a modified BI-CBT 8 step program + Skin care education + appearance enhancement workshop<br>C: Usual care                                                                                                                                 | Other SLE patients                 | Intervention: 10<br>Control: 5      | 1ry: improvement in HRQoL                                                            | 10; I  | Jolly, 2014 [66]     |
| P: Cognitive-Behaviour Therapy sessions, psychoeducational intervention, expressive group psychotherapy.<br>C: N/A                                                                                                                                  | N/A                                | 6 RCTs                              | 1ry: improvement in depression, disease activity, fatigue, HRQoL and pain.           | 12; R  | Liang, 2014 [67]     |
| P: Follow the "Better Choice, Better Health" Chronic Disease Self-Management Program (CDSMP)<br>C: Usual care                                                                                                                                       | Other SLE patients                 | Intervention: 15<br>Control: 15     | 1ry: psychological distress; 2ry: HRQoL, depression                                  | 11; W  | Williams, 2014 [68]  |
| P: Participate in a mindfulness group protocol<br>C: N/A: intraindividual assessment                                                                                                                                                                | N/A;<br>intraindividual assessment | Intervention: 6<br>Control: -       | Coping abilities                                                                     | 4; W   | Horesh, 2017 [69]    |
| P: Attend a mindfulness-based cognitive therapy<br>C: General recommendations about health lifestyle                                                                                                                                                | Other SLE patients                 | Intervention: 23<br>Control: 23     | 1ry: changes in psychological symptoms and HRQoL                                     | 11; I  | Solati, 2017 [70]    |
| P: Brief group psychoanalytic psychotherapy: 90 min session once a week for 20 weeks.<br>C: Usual care                                                                                                                                              | Other SLE patients                 | Intervention: 43<br>Control: 37     | 1ry: improvement in disease activity, HRQoL, coping skills, anxiety, and depression. | 11; I  | Conceição, 2019 [71] |
| P: Attend 10 Cognitive-Behaviour Therapy sessions<br>C: N/A                                                                                                                                                                                         | N/A                                | 2 studies: 2 RCTs                   | 1ry: changes in HRQoL domains, anxiety, and depression                               | 12; R  | da Hora, 2019 [26]   |
| P: Attend a mindfulness-based cognitive therapy + homework<br>C: N/A: intraindividual assessment                                                                                                                                                    | N/A;<br>intraindividual assessment | Intervention: 25<br>Control: -      | 1ry: changes in depression, anxiety, stress, and satisfaction with life              | 10; I  | Kim, 2019 [72]       |
| P: Eight Sessions of Acceptance and Commitment Therapy (ACT)<br>C: Usual care                                                                                                                                                                       | Other SLE patients                 | Intervention: 12<br>Control: 12     | 1ry: changes in disappointment, psychological distress, and psychasthenia;           | 10; I  | Sahebari, 2019 [73]  |
| P: Receive psychoeducational interventions<br>C: Health education, and nontargeted psychological comfort                                                                                                                                            | Other SLE patients                 | Intervention: 42<br>Control: 43     | 1ry: changes in HRQoL, anxiety and depression                                        | 11; W  | Xu, 2021 [74]        |
| <b>Dietary therapy and nutrition</b>                                                                                                                                                                                                                |                                    |                                     |                                                                                      |        |                      |
| P: NCEP Step 2 diet: 30% or less calories from fat (7% from saturated fat, 13% from monounsaturated fat, and 10% from polyunsaturated fat), and < 200 mg of cholesterol per day + maintain their usual level of physical activity.<br>C: Usual care | Other SLE patients                 | Intervention: 8<br>Control: 8       | 1ry: changes in dietary intake, HRQoL, lipid profile.; 2ry: disease activity         | 11; W  | Shah, 2002 [75]      |

| Intervention/management strategy                                                                                                                                                                                                                                                                                                                                                          | Comparator                      | N                                 | Aim of management                                                                                                                             | SD&OA* | Reference             |
|-------------------------------------------------------------------------------------------------------------------------------------------------------------------------------------------------------------------------------------------------------------------------------------------------------------------------------------------------------------------------------------------|---------------------------------|-----------------------------------|-----------------------------------------------------------------------------------------------------------------------------------------------|--------|-----------------------|
| <p>P: No intervention.</p> <p>Dietary nutrients estimated by a semiquantitative food frequency questionnaire</p> <p>C: No</p>                                                                                                                                                                                                                                                             | Other SLE patients              | Intervention: 7<br>Control: 189   | 1ry: changes in dietary intake, disease activity, organ damage.                                                                               | 5; R   | Minami, 2003 [76]     |
| <p>P: 1° group: 3g MaxEPA+ 3mg copper</p> <p>2° group: 3g MaxEPA + placebo copper</p> <p>3° group: 3 mg copper+ placebo oil fish</p> <p>C: Placebo</p>                                                                                                                                                                                                                                    | Other SLE patients              | Intervention: 40<br>Control: 12   | 1ry: changes in disease activity 2ry: haematological, biochemical, and immunological indices.                                                 | 11; W  | Duffy, 2004 [77]      |
| <p>P: Counselling to follow the NCEP Step II diet: &lt; 30% of energy as fat and &lt; 7% as saturated fat, and &lt; 200 mg of cholesterol per day 21.</p> <p>Counselling to limit their intake of sodium (&lt; 2400 mg/day) and refined and added sugars and consume 2–3 servings of skim/low fat dairy foods and ≥ 5 servings of fruits and vegetables per day.</p> <p>C: Usual care</p> | Other SLE patients              | Intervention: 8<br>Control: 7     | 1ry: changes in dietary intake, HRQoL, lipid profile.; 2ry: disease activity                                                                  | 11; W  | Shah, 2004 [78]       |
| <p>P: Assessing daily use of micronutrient supplements (MS) in SLE patients: Calcium, Vitamin D, Multivitamins (vitamin B6, folic acid, minerals iron, B12, C, E, magnesium, potassium).</p> <p>C: No</p>                                                                                                                                                                                 | Other SLE patients              | Intervention: 137<br>Control: 122 | 1ry: changes in disease activity, disease damage, HRQoL, healthcare resource utilization.                                                     | 1; I   | Aghdassi, 2010 [79]   |
| <p>P: No intervention.</p> <p>Dietary nutrients estimated by a semiquantitative food frequency questionnaire (Vitamin B6, Vitamin B12, folate, total dietary fibre, soluble dietary fibre, insoluble dietary fibre).</p> <p>C: No</p>                                                                                                                                                     | Other SLE patients              | Intervention: 216<br>Control: -   | 1ry: changes in disease activity.                                                                                                             | 5; R   | Minami, 2011 [80]     |
| <p>P: Reduced calorie diet (1200/1500 kcal/d) [combined with increasing exercise from 100 to 300 min/w]</p> <p>C: N/A: intraindividual assessment</p>                                                                                                                                                                                                                                     | N/A; intraindividual assessment | Intervention: 15<br>Control: -    | 1ry: changes in BMI, waist circumference, physical activity                                                                                   | 10; W  | Otto, 2011 [6]        |
| <p>P: Low GI diet whereby carbohydrate intake was limited to 45 g per day of low GI food, without restricting the consumption of fat and protein</p> <p>C: Low calorie diet</p>                                                                                                                                                                                                           | Other SLE patients              | Intervention: 11<br>Control: 12   | 1ry: differences in weight loss.; 2ry: tolerability of diet, biomarkers of cardiovascular risk, disease activity, fatigue, and sleep quality. | 11; W  | Davies, 2012 [81]     |
| <p>P: No intervention.</p> <p>Administration of food frequency questionnaire (FFQ) + study of fatty acid content and plaque occurrence</p> <p>C: No</p>                                                                                                                                                                                                                                   | Other SLE patients              | Intervention: 114<br>Control: 122 | 1ry: changes in dietary intake, disease activity, CV risk.                                                                                    | 1; I   | Elkan, 2012 [82]      |
| <p>P: With each meal, each patient received 1 capsule for 3 months, containing 500 mg turmeric (22.1 mg was the active ingredient curcumin)</p> <p>C: Placebo</p>                                                                                                                                                                                                                         | Other SLE patients              | Intervention: 12<br>Control: 12   | 1ry: effect on proteinuria.; 2ry: blood pressure, haematuria.                                                                                 | 11; I  | Khajehdehi, 2012 [83] |

| Intervention/management strategy                                                                                                                                                                                                                                                                                                                                                     | Comparator                            | N                                | Aim of management                                                                                                          | SD&OA* | Reference                   |
|--------------------------------------------------------------------------------------------------------------------------------------------------------------------------------------------------------------------------------------------------------------------------------------------------------------------------------------------------------------------------------------|---------------------------------------|----------------------------------|----------------------------------------------------------------------------------------------------------------------------|--------|-----------------------------|
| P: CVD-PCP counselling program= Phase 1: assessment of CVD risk factor on patients<br><br>Phase 2: education on cardiovascular diseases and discussion on prevention strategies. Followed by a patient-centred nutrition counselling to attend at least once a month<br><br>C: Usual care                                                                                            | Other SLE patients                    | Intervention: 41<br>Control: 30  | 1ry: changes in dietary intake, weight/ BMI, waist circumference, lipid profile.;                                          | 10; I  | Everett, 2015 [84]          |
| P: 1000 mg of green tea extract<br><br>C: Placebo                                                                                                                                                                                                                                                                                                                                    | Other SLE patients                    | Intervention: 32<br>Control: 36  | 1ry: changes in disease activity.; 2ry: HRQoL                                                                              | 11; I  | Shamekhi, 2017 [85]         |
| P: Health coaching (weekly calls to educate and implement changes based on data analysis)<br><br>C: Usual care                                                                                                                                                                                                                                                                       | Other SLE patients                    | Intervention: 20<br>Control: 20  | 1ry: improvement in fatigue, pain and HRQoL;                                                                               | 11; W  | Rothman, 2018 [86]          |
| P: No intervention.<br><br>Good adherence (>10 points) to Med Diet (14-item questionnaire on food consumption frequency and habits)<br><br>C: No                                                                                                                                                                                                                                     | Other SLE patients                    | Intervention: 143<br>Control: 16 | 1ry: improvement in disease activity, organ damage, CV risk, anthropometric data.                                          | 1; R   | Pocovi-Gerardino, 2021 [87] |
| <b>Complementary and alternative medicine</b>                                                                                                                                                                                                                                                                                                                                        |                                       |                                  |                                                                                                                            |        |                             |
| P: Administration of Traditional Chinese Medicine (cicimifuga rhizome 9g + oldenlandia herb 18 h, southernwood 15 g, red peony root 12 g + moutan bark 12 g+ rehmannia root 15 g+ turtle shell 12g etc)<br><br>C: Usual care (Western medicine)                                                                                                                                      | Other SLE patients                    | Intervention: 85<br>Control: 85  | 1ry: changes in lipid levels                                                                                               | 11; W  | Wen, 2007 [88]              |
| P: Acupuncture (modified Feng 1985 protocol)<br><br>C: Minimal needling, usual care                                                                                                                                                                                                                                                                                                  | Other SLE patients                    | Intervention: 103<br>Control: 89 | 1ry: changes in pain, fatigue, disease activity; 2ry: feasibility, adherence to protocol                                   | 11; I  | Greco, 2008 [89]            |
| P: Being CAT (complementary and alternative therapies) users<br><br>C: No                                                                                                                                                                                                                                                                                                            | Other SLE patients                    | Intervention:<br>Control:        | 1ry: changes in HRQoL, organ damage                                                                                        | 1; R   | Alvarez-Nemegyei, 2009 [90] |
| P: Traditional Chinese Medicine: Dan-Chi-Liu-Wei combination (granules)<br><br>C: Usual care + 10% Traditional Chinese medicine                                                                                                                                                                                                                                                      | Other SLE patients                    | Intervention:<br>Control:        | 1ry: change of steroid dosage; 2ry: frequency of disease flare-up, change in the immunologic index (C3, C4, anti-dsDNA); ; | 11; I  | Liao, 2011 [91]             |
| P: Zi Shen Qing (combination of 6 herbs)<br><br>C: Hydroxychloroquine 100 mg/12h PO                                                                                                                                                                                                                                                                                                  | Other SLE patients                    | Intervention: 42<br>Control: 42  | 1ry: change in SLEDAI-2K; 2ry: change in Chinese medicine syndromes (CMS), change in prednisone dose, frequency of flares  | 11; I  | Linda, 2013 [92]            |
| <b>Photoprotection</b>                                                                                                                                                                                                                                                                                                                                                               |                                       |                                  |                                                                                                                            |        |                             |
| P: 3 different sunscreens:<br><br>Sunscreen A: UVB: Octocrylene. UVA: Mexoryl SX, Mexoryl XL, Parsol 1789. TiO2), SPF >60<br><br>Sunscreen B: (UVB: Eusolex 6300, Parsol MCX, Uvinul T150, Neohelipan. UVA: Parsol 1789. TiO2), SPF >75<br><br>Sunscreen C: (Eusolex 6300, Parsol MCX, Uvinul T150<br><br>UVA: Parsol 1789. TiO2) SPF= 35]<br><br>C: N/A: intraindividual assessment | N/A;<br>intraindividual<br>assessment | Intervention: 11<br>Control: -   | 1ry: development of photoprovocation-induced skin lesions;                                                                 | 10; R  | Stege, 2000 [93]            |



| Intervention/management strategy                                                                                                                                                          | Comparator                                   | N                                | Aim of management                                                                                                                                           | SD&OA* | Reference                |
|-------------------------------------------------------------------------------------------------------------------------------------------------------------------------------------------|----------------------------------------------|----------------------------------|-------------------------------------------------------------------------------------------------------------------------------------------------------------|--------|--------------------------|
| P: 2 mg/cm <sup>2</sup> sunscreen Anthelios W30 La Roche-Posay (parsol 1789, uvinul N539, uvinul T150, mexoryl XL, titanium dioxide)<br>C: N/A: intraindividual assessment                | N/A; intraindividual assessment              | Intervention: 66<br>Control: -   | 1ry: development of photoprovocation-induced skin lesions;                                                                                                  | 5; W   | Herzinger, 2004 [94]     |
| P: 9-week course of low-dose UVA1 phototherapy<br>C: N/A: intraindividual assessment                                                                                                      | N/A; intraindividual assessment              | Intervention: 9<br>Control: -    | 1ry: changes in immunological parameters, disease activity                                                                                                  | 10; I  | Szegedi, 2005 [95]       |
| P: Broad-spectrum liposomal sunscreen 20 min prior to a combined standardized UVA/UVB irradiation<br>C: Unprotected skin, sunscreen use                                                   | Healthy controls, intraindividual assessment | Intervention: 20<br>Control: 10  | 1ry: changes in IFN-driven inflammation;                                                                                                                    | 10; I  | Zahn, 2014 [96]          |
| P: Photoprotection awareness<br>C: No                                                                                                                                                     | Other SLE patients                           | Intervention: 205<br>Control: 17 | 1ry: changes in organ damage, disease activity (awareness, knowledge-related)                                                                               | 1; I   | Abdul Kadir, 2018 [97]   |
| <b>Healthcare models</b>                                                                                                                                                                  |                                              |                                  |                                                                                                                                                             |        |                          |
| P: Analysis (coding) of active patient-physician communication from audiotaped routine visits<br>C: N/A: intraindividual assessment                                                       | N/A; intraindividual assessment              | Intervention: 79<br>Control: -   | 1ry: changes in disease activity                                                                                                                            | 10; I  | Ward, 2003 [98]          |
| P: Application of the continuous care model (CCM) [Orientation, sensitization, control]<br>C: N/A: intraindividual assessment                                                             | N/A; intraindividual assessment              | Intervention: 34<br>Control: -   | 1ry: changes in knowledge, HRQoL                                                                                                                            | 10; I  | Sahebalzamani, 2017 [99] |
| P: Transitional care plan (structural assessments and corresponding interventions based on the Omaha System) + telephone follow up 2, 3, 6, and 10 weeks after discharge<br>C: Usual care | Other SLE patients                           | Intervention: 64<br>Control: 61  | 1ry: improvement of self-care, readmission rates, quality of life;                                                                                          | 11; I  | Xie, 2018 [100]          |
| P: Multidisciplinary care (from a physician, pharmacist, and nurse) in addition to routine clinical follow up<br>C: Usual care                                                            | Other SLE patients                           | Intervention: 42<br>Control: 40  | 1ry: changes in disease activity, satisfaction with information about medicines, HRQoL; 2ry: organ damage, self-reported adherence, beliefs about medicines | 11; W  | Zhang, 2019 [101]        |
| <b>Laser treatment</b>                                                                                                                                                                    |                                              |                                  |                                                                                                                                                             |        |                          |
| P: Treatment with pulsed dye laser (PDL) on discoid lesions<br>C: N/A: intraindividual assessment                                                                                         | N/A; intraindividual assessment              | Intervention: 12<br>Control: -   | 1ry: improvement in Cutaneous Lupus Erythematosus Disease Area and Severity Index (CLASI);                                                                  | 10; R  | Erceg, 2009 [102]        |
| P: Treatment with pulsed dye laser (PDL) on discoid lesions<br>C: N/A: intraindividual assessment                                                                                         | N/A; intraindividual assessment              | Intervention: 9<br>Control: -    | 1ry: improvement in cutaneous disease activity and organ damage                                                                                             | 10; I  | Rerknimitr, 2019 [103]   |
| <b>Social support</b>                                                                                                                                                                     |                                              |                                  |                                                                                                                                                             |        |                          |
| P: Attend support group<br>C: No                                                                                                                                                          | Other SLE patients                           | Intervention: 34<br>Control: 71  | 1ry: improvement in HRQoL                                                                                                                                   | 1; R   | Dorsey, 2004 [104]       |
| P: No intervention (exposure to illness uncertainty, social support, coping modes through questionnaires)- being hospitalized for over a week<br>C: N/A: intraindividual assessment       | N/A; intraindividual assessment              | Intervention: 200<br>Control: -  | 1ry: changes in illness uncertainty, social support, coping modes;                                                                                          | 1; R   | Li, 2019 [105]           |
| <b>Others</b>                                                                                                                                                                             |                                              |                                  |                                                                                                                                                             |        |                          |

| Intervention/management strategy                                                                                                               | Comparator                      | N                                                                         | Aim of management                                                             | SD&OA* | Reference                 |
|------------------------------------------------------------------------------------------------------------------------------------------------|---------------------------------|---------------------------------------------------------------------------|-------------------------------------------------------------------------------|--------|---------------------------|
| P: Meditation instruction + meditation practice<br>C: Usual care                                                                               | Other SLE patients              | Intervention: 15<br>Control: 15                                           | 1ry: changes in renal function, HRQoL                                         | 10; I  | Bantornwan, 2014 [106]    |
| P: Completing a Home Cleaning and Maintenance Product list (HCMPL) questionnaire<br>C: No                                                      | Other SLE patients              | Intervention: 80<br>Control: 41                                           | 1ry: changes in flares frequency                                              | 2; I   | Squance, 2015 [107]       |
| P: No intervention.<br>Self-reported smoking status (smoker: one cigarette per day for three consecutive months)<br>C: No                      | Other SLE patients              | Intervention: 65<br>Control: 665                                          | 1ry: differences in disease activity, haematuria, nephropathy.                | 1; R   | Xu, 2015 [108]            |
| P: 1° group= warm shower / 2° group= warm footbath with adding of 2 cups of Epsom salt<br>C: Warm shower                                       | Other SLE patients              | Intervention: 60<br>Control: 30                                           | 1ry: changes in fatigue                                                       | 10; R  | Abdelaziz, 2020 [109]     |
| P: Training of the patient on how to use the cosmetic camouflage. Letting the patient use camouflage based on personal needs.<br>C: Usual care | Other SLE patients              | Intervention: 28<br>Control: 15                                           | 1ry: changes in HRQoL                                                         | 11; W  | Oliveira, 2020 [110]      |
| P: Transcutaneous auricular vagus nerve stimulation (taVNS)<br>C: Sham-stimulation                                                             | Other SLE patients              | Intervention: 12<br>Control: 6                                            | 1ry: pain, tolerability; 2ry: fatigue, swollen joints count, disease activity | 11; I  | Aranow, 2021 [111]        |
| <b>SSc</b>                                                                                                                                     |                                 |                                                                           |                                                                               |        |                           |
| <b>Physical exercise and physical activity</b>                                                                                                 |                                 |                                                                           |                                                                               |        |                           |
| P: Mouth stretching exercise and oral augmentation exercise<br>C: N/A: intraindividual assessment                                              | N/A; intraindividual assessment | Intervention: 10 selected among 35 patients with MMO≤30mm<br>Control: N/A | Increase in mouth opening                                                     | 10; R  | Pizzo, 2003 [112]         |
| P: Paraffin bath and hand exercises<br>C: N/A: intraindividual assessment                                                                      | N/A; intraindividual assessment | Intervention: 17<br>Control: N/A                                          | Improvement of hand mobility                                                  | 10; I  | Sandqvist, 2004 [113]     |
| P: Self-administrated stretching<br>C: No intervention                                                                                         | Healthy controls                | Intervention: 45<br>Control: 21 healthy controls                          | Improvement of hand mobility (fingers)                                        | 10; I  | Mugii, 2006 [114]         |
| P: Individualised rehabilitation program followed by at-home exercise<br>C: Usual care                                                         | Other SSc patients              | Intervention: 16<br>Control: 17                                           | Improvement in quality of life and hand mobility                              | 10; R  | Antonioli, 2009 [115]     |
| P: Connective tissue massage, Mc Mennell joint manipulation and home exercise<br>C: Home exercise programme alone                              | Other SSc patients              | Intervention: 20<br>Control: 20                                           | Improvement of hand mobility                                                  | 11; I  | Bongi, 2009 [116]         |
| P: Tailored rehabilitation program with manual therapy and exercise<br>C: Educational advice and information about SSc                         | Other SSc patients              | Intervention: 10<br>Control: 10                                           | Improvement of global health, hand- and mouth mobility                        | 11; W  | Maddali Bongi, 2009 [117] |
| P: Aerobic exercise programme<br>C: Aerobic exercise programme                                                                                 | Healthy controls                | Intervention: 7<br>Control: 7                                             | Improvement of aerobic capacity                                               | 10; I  | Oliveira, 2009 [118]      |

| Intervention/management strategy                                                                                                                                                                                     | Comparator                      | N                                                         | Aim of management                                                | SD&OA* | Reference                 |
|----------------------------------------------------------------------------------------------------------------------------------------------------------------------------------------------------------------------|---------------------------------|-----------------------------------------------------------|------------------------------------------------------------------|--------|---------------------------|
| P: Combined connective tissue massage, Kabat's technique, kinesiotherapy and home mimic exercise program<br>C: Home exercise programme alone                                                                         | Other SSc patients              | Intervention: 20<br>Control: 20                           | Increase in mouth opening                                        | 11; I  | Maddali Bongi, 2011 [119] |
| P: Supervised, treadmill, treadmill (aerobic), stretching exercise<br>C: N/A: intraindividual assessment                                                                                                             | N/A; intraindividual assessment | Intervention: 11<br>Control: N/A                          | Improvement of physical fitness                                  | 10; R  | Pinto, 2011 [120]         |
| P: Multi-faceted oral health intervention<br>C: Usual care                                                                                                                                                           | Other SSc patients              | Intervention: 26<br>Control: 22                           | Improvement of oral hygiene                                      | 11; W  | Yuen, 2011 [121]          |
| P: Orofacial exercise + multifaceted oral health intervention<br>C: Usual care                                                                                                                                       | Other SSc patients              | Intervention: 26<br>Control: 22                           | Increase in mouth opening                                        | 11; I  | Yuen, 2012 [122]          |
| P: Stretching and mobility exercises at home using a newly developed telemedicine system<br>C: Home kinesiotherapy protocol                                                                                          | SSc patients and RA-patients    | Intervention: 20 (10 with RA)<br>Control: 20 (10 with RA) | Improvement of hand mobility                                     | 11; W  | Piga, 2014 [123]          |
| P: Muscle strength<br>C: No intervention                                                                                                                                                                             | Healthy controls                | Intervention: 20<br>Control: 20                           | Assessment of peripheral and respiratory muscle strength         | 1; R   | Lima, 2015 [124]          |
| P: Hand stretching exercise and weekly phone call with occupational therapist, with specific timetable for when to conduct exercise<br>C: Hand stretching exercise and weekly phone call with occupational therapist | Other SSc patients              | Intervention: 15<br>Control: 16                           | Improvement of hand mobility                                     | 11; I  | Stefanantoni, 2016 [125]  |
| P: Hand stretching & hip exercise, ergotherapy, thermal & mud bath, whirlpool therapy, soft tissue massage of the hands and joints<br>C: Same as intervention, but excluding treatment of the hands.                 | Other SSc patients              | Intervention: 31<br>Control: 22                           | Improvement of hand mobility                                     | 10; R  | Horváth, 2017 [126]       |
| P: Personalized physical therapy session with physiotherapist and occupational therapist<br>C: Usual care                                                                                                            | Other SSc patients              | Intervention: 110<br>Control: 108                         | Reduction of functional impairment                               | 11; R  | Rannou, 2017 [127]        |
| P: Exercise habits<br>C: No intervention                                                                                                                                                                             | Other SSc patients              | Intervention: 389<br>Control: 363                         | Assessment of correlations between exercise and disease activity | 5; I   | Azar, 2018 [128]          |
| P: Manual therapy and physiotherapy, three weeks every year for three years<br>C: N/A: intraindividual assessment                                                                                                    | N/A; intraindividual assessment | Intervention: 43<br>Control: N/A                          | Development of a personalised rehabilitation programme           | 10; R  | Brignoli, 2018 [129]      |
| P: Intervention 1: HIIT (cycling) twice a week for 12 weeks<br>Intervention 2: HIIT (arm cranking) twice a week for 12 weeks<br>C: No training protocol                                                              | Other SSc patients              | Intervention 1: 11<br>Intervention 2: 11<br>Control: 12   | Improvement of microcirculation in the digital area              | 11; W  | Mitropoulos, 2018 [130]   |
| P: Thermal modalities, tissue mobilisation, and upper extremity exercises with occupational therapist<br>C: N/A: intraindividual assessment                                                                          | N/A; intraindividual assessment | Intervention: 21<br>Control: N/A                          | Improvement of hand mobility                                     | 10; R  | Murphy, 2018 [131]        |
| P: Paraffin bath and hand exercises<br>C: Hand exercises without wax bath                                                                                                                                            | Other SSc patients              | Intervention: 17<br>Control: 19                           | Improvement of hand mobility                                     | 11; I  | Gregory, 2019 [132]       |
| P: Paraffin bath and hand exercises<br>C: Water bath, hand exercise                                                                                                                                                  | Other SSc patients              | Intervention: 43<br>Control: 43                           | Improvement of hand mobility                                     | 11; I  | Kristensen, 2019 [133]    |

| Intervention/management strategy                                                                                                                                                           | Comparator                      | N                                                                   | Aim of management                                                        | SD&OA* | Reference                 |
|--------------------------------------------------------------------------------------------------------------------------------------------------------------------------------------------|---------------------------------|---------------------------------------------------------------------|--------------------------------------------------------------------------|--------|---------------------------|
| P: Home based self-management programme that consisted of a booklet and information about SSc<br>C: N/A: intraindividual assessment                                                        | N/A; intraindividual assessment | Intervention: 22<br>Control: N/A                                    | Alleviation of pain and improvement of hand mobility                     | 10; R  | Landim, 2019 [134]        |
| P: Combined programme with HIIT and resistance training, twice weekly for 12 weeks<br>C: No intervention                                                                                   | Other SSc patients              | Intervention: 16<br>Control: 16                                     | Improvement of microvascular function                                    | 11; W  | Mitropoulos, 2019 [135]   |
| P: Tai Chi<br>C: Home exercise                                                                                                                                                             | Other SSc patients              | Intervention: 14<br>Control: 14                                     | Improvement of physical endurance                                        | 11; W  | Cetin, 2020 [136]         |
| P: Home-based aerobic exercise (stationary bike), muscular endurance training (upper limbs) and stretching (hands)<br>C: Usual care                                                        | Other SSc patients              | Intervention: 22<br>Control: 22                                     | Improvement of functional capacity                                       | 11; I  | Filippetti, 2020 [137]    |
| P: Self-management programme composed of a booklet<br>C: No intervention                                                                                                                   | Other SSc patients              | Intervention: 40<br>Control: 17                                     | Improvement of hand mobility                                             | 10; I  | Landim, 2020 [138]        |
| P: Orofacial exercise programme followed by oral hygiene care advice<br>C: Oral hygiene care advice followed by orofacial exercise programme                                               | Other SSc patients              | Intervention: 28<br>Control: 28                                     | Increase of mouth opening                                                | 11; I  | Cüzdán, 2021 [139]        |
| P: High-intensity interval exercise (HIIT)<br>C: N/A: intraindividual assessment                                                                                                           | N/A; intraindividual assessment | Intervention: 11<br>Control: N/A                                    | Improvement of physical fitness, hand function and functional impairment | 10; I  | Defi, 2021 [140]          |
| P: Booklet, isometric hand exercise and self-administrated stretching<br>C: Booklet alone                                                                                                  | Other SSc patients              | Intervention: 32<br>Control: 30                                     | Improvement of hand mobility                                             | 11; I  | Gokcen, 2021 [141]        |
| P: Home exercises for temporomandibular joint, mimic, masticatory and cervical spine muscles<br>C: Home exercises and combined physiotherapeutic procedures performed by a physiotherapist | Other SSc patients              | Intervention: 25<br>Control: 22                                     | Increase of mouth opening                                                | 11; W  | Maddali Bongi, 2021 [142] |
| P: Intensive occupational therapy and app-delivered home exercise.<br>C: App alone                                                                                                         | Other SSc patients              | Intervention: 16<br>Control: 16                                     | Improvement of hand and upper extremity function                         | 11; W  | Murphy, 2021 [143]        |
| <b>Patient education and self-management</b>                                                                                                                                               |                                 |                                                                     |                                                                          |        |                           |
| P: Educational programme<br>C: N/A: intraindividual assessment                                                                                                                             | N/A; intraindividual assessment | Intervention: 6<br>Control: N/A                                     | Reduction of pain and fatigue                                            | 10; I  | Samuelson, 2000 [144]     |
| P: Educational programme<br>C: Educational programme                                                                                                                                       | SLE-patients                    | Intervention: 5 with SSc, 5 with SLE<br>Control: N/A                | Improvement of patient education                                         | 9; R   | Brown, 2004 [36]          |
| P: Multidisciplinary disease management programme<br>C: N/A: intraindividual assessment                                                                                                    | N/A; intraindividual assessment | Intervention: 41<br>Control: N/A                                    | To improve mental health                                                 | 10; R  | Kwakkenbos, 2011 [145]    |
| P: Mail-delivered self-management programme<br>C: N/A: intraindividual assessment                                                                                                          | N/A; intraindividual assessment | Intervention: 62 (49 completers, 13 non-completers)<br>Control: N/A | Reduction of pain and fatigue                                            | 10; I  | Poole, 2013 [146]         |

| Intervention/management strategy                                                                                                                                                                     | Comparator                              | N                                                             | Aim of management                                            | SD&OA*  | Reference              |
|------------------------------------------------------------------------------------------------------------------------------------------------------------------------------------------------------|-----------------------------------------|---------------------------------------------------------------|--------------------------------------------------------------|---------|------------------------|
| P: Self-management website with 10 modules<br>C: N/A: intraindividual assessment                                                                                                                     | N/A;<br>intraindividual assessment      | Intervention: 16<br>Control: N/A                              | To assess the effects of an internet self-management program | 10; R   | Poole, 2014 [147]      |
| P: Informative meeting followed by occupational therapy<br>C: Informative meeting alone                                                                                                              | Other SSc patients                      | Intervention: 10<br>Control: 10                               | Alleviation of activities of daily living                    | 10; R   | Zanatta, 2017 [148]    |
| P: Self-management website<br>C: Book                                                                                                                                                                | Other SSc patients                      | Intervention: 134<br>Control: 133                             | Improvement of quality of life                               | 11; W   | Khanna, 2019 [149]     |
| P: Home based self-management programme that consisted of a booklet and information about SSc<br>C: N/A: intraindividual assessment                                                                  | N/A;<br>intraindividual assessment      | Intervention: 22<br>Control: N/A                              | Alleviation of pain                                          | 10; R   | Landim, 2019 [134]     |
| P: Scleroderma Support group Leader Education (SPIN-SSLED) programme<br>C: N/A: intraindividual assessment                                                                                           | N/A;<br>intraindividual assessment      | Intervention: 10<br>Control: N/A                              | Delivery of social support                                   | 10; R   | Thombs, 2019 [150]     |
| P: Face-to-face training + standard information programme (i.e., brochures, DVD)<br>C: Educational materials alone                                                                                   | Other SSc patients                      | Intervention: 31<br>Control: 32                               | Increase of mouth opening                                    | 11; I   | Uras, 2019 [151]       |
| P: Self-management programme composed of a booklet<br>C: No intervention                                                                                                                             | Other SSc patients                      | Intervention: 40<br>Control: 17                               | Improvement of hand mobility                                 | 10; I   | Landim, 2020 [138]     |
| P: Videoconference-based group intervention that provided education and practice with mental health coping strategies<br>C: No intervention                                                          | Other SSc patients                      | Intervention: 86<br>Control: 86                               | Reduction of anxiety                                         | 11; I   | Thombs, 2021 [152]     |
| <b>Bathing and thermal modalities</b>                                                                                                                                                                |                                         |                                                               |                                                              |         |                        |
| P: Paraffin bath and hand exercises<br>C: N/A: intraindividual assessment                                                                                                                            | N/A<br>intraindividual assessment       | Intervention: 17<br>Control: N/A                              | Improvement of hand mobility                                 | 10<br>I | Sandqvist, 2004 [113]  |
| P: Hand stretching & hip exercise, ergotherapy, thermal & mud bath, whirlpool therapy, soft tissue massage of the hands and joints<br>C: Same as intervention, but excluding treatment of the hands. | Other SSc patients                      | Intervention: 31<br>Control: 22                               | Improvement of hand mobility                                 | 10<br>R | Horváth, 2017 [126]    |
| P: Thermal modalities, tissue mobilisation, and upper extremity exercises with occupational therapist<br>C: N/A: intraindividual assessment                                                          | N/A<br>intraindividual assessment       | Intervention: 21<br>Control: N/A                              | Improvement of hand mobility                                 | 10<br>R | Murphy, 2018 [131]     |
| P: Taohong Siwu Decoction (TSD) + oral Prednisone (10mg daily)<br>C: Placebo + oral prednisone                                                                                                       | Other SSc patients                      | Intervention: 71<br>Control: 71                               | Reduction of skin sclerosis                                  | 11<br>I | Zhou, 2018 [153]       |
| P: Paraffin bath and hand exercises<br>C: Hand exercises without wax bath                                                                                                                            | Other SSc patients                      | Intervention: 17<br>Control: 19                               | Improvement of hand mobility                                 | 11<br>I | Gregory, 2019 [132]    |
| P: Paraffin bath and hand exercises<br>C: Water bath, hand exercise                                                                                                                                  | Other SSc patients                      | Intervention: 43<br>Control: 43                               | Improvement of hand mobility                                 | 11<br>I | Kristensen, 2019 [133] |
| P: Intervention 1 (I1): Hand immersion in Bastian CO <sub>2</sub> bath. Intervention 2 (I2): Hand immersion in hot water<br>C: Hand immersion in Bastian CO <sub>2</sub> bath                        | Other SSc patients and healthy controls | Intervention: 12<br>in each intervention group<br>Control: 12 | Reduction of Raynaud's phenomenon                            | 11<br>I | Lange, 2019 [154]      |

| Intervention/management strategy                                                                                                                                                                     | Comparator                                   | N                                              | Aim of management                                            | SD&OA*  | Reference                 |
|------------------------------------------------------------------------------------------------------------------------------------------------------------------------------------------------------|----------------------------------------------|------------------------------------------------|--------------------------------------------------------------|---------|---------------------------|
| P: Ozone bath, 2 series of 10 days per series with 10 days apart<br>C: N/A: intraindividual assessment                                                                                               | N/A intraindividual assessment               | Intervention: 42<br>Control: N/A               | Reduced expression of inflammatory markers                   | 10<br>I | Nowicka, 2019 [155]       |
| <b>Complementary and alternative medicine</b>                                                                                                                                                        |                                              |                                                |                                                              |         |                           |
| P: Active phase of study: Transcutaneous Electrical Nerve Stimulation (TENS)<br>Prolonged study phase: Patients trained to use TENS on a specific acupoints at home<br>C: Active phase of study only | Healthy controls                             | Intervention: 17<br>Control: 9                 | Improvement of gastrointestinal symptoms and quality of life | 10<br>W | Sallam, 2007 [156]        |
| P: Deep oscillation, Biofeedback<br>C: No intervention                                                                                                                                               | Other SSc patients                           | Intervention: Do: 10<br>Biof: 8<br>Control: 10 | Reduction of Raynaud's Phenomenon                            | 11<br>W | Sporbeck, 2012 [157]      |
| P: TENS<br>C: N/A: intraindividual assessment                                                                                                                                                        | N/A intraindividual assessment               | Intervention: 17<br>Control: N/A               | Improvement of neurogastric functioning                      | 10<br>I | McNearney, 2013 [158]     |
| P: Biofeedback training<br>C: Biofeedback training                                                                                                                                                   | Patients with functional faecal incontinence | Intervention: 13<br>Control: 26                | Reduction of faecal incontinence                             | 2<br>R  | Collins, 2016 [159]       |
| P: Taohong Siwu Decoction (TSD) + oral Prednisone<br>C: Placebo + oral prednisone                                                                                                                    | Other SSc patients                           | Intervention: 71<br>Control: 71                | Reduction of skin sclerosis                                  | 11<br>I | Zhou, 2018 [153]          |
| P: Received Ciplukan herb ( <i>Physalis angulata</i> Linn) 250mg<br>C: Placebo                                                                                                                       | Other SSc patients                           | Intervention: 29<br>Control: 30                | Reduction of skin sclerosis                                  | 11<br>I | Dewi, 2019 [160]          |
| P: Tai Chi<br>C: Home exercise                                                                                                                                                                       | Other SSc patients                           | Intervention: 14<br>Control: 14                | Improvement of physical endurance                            | 11<br>W | Cetin, 2020 [136]         |
| P: Holoil (contained Neem oil and <i>Hypericum perforatum</i> )<br>C: Usual care                                                                                                                     | Other SSc patients                           | Intervention: 21<br>Control: 20                | Resolution of skin ulcers                                    | 2<br>I  | Giuggioli, 2020 [161]     |
| <b>Manual therapy</b>                                                                                                                                                                                |                                              |                                                |                                                              |         |                           |
| P: Connective tissue massage, Mc Mennell joint manipulation and home exercise<br>C: Home exercise programme alone                                                                                    | Other SSc patients                           | Intervention: 20<br>Control: 20                | Improvement of hand mobility                                 | 11<br>I | Bongi, 2009 [116]         |
| P: Tailored rehabilitation program with manual therapy and exercise<br>C: Educational advice and information about SSc                                                                               | Other SSc patients                           | Intervention: 10<br>Control: 10                | Improvement of global health, hand- and mouth mobility       | 11<br>W | Maddali Bongi, 2009 [117] |
| P: Manual lymph drainage (MDL)<br>C: No intervention                                                                                                                                                 | Other SSc patients                           | Intervention: 20<br>Control: 15                | Improvement in hand mobility                                 | 11<br>R | Bongi, 2011 [162]         |
| P: Combined connective tissue massage, Kabat's technique, kinesitherapy and home mimic exercise program<br>C: Home exercise programme alone                                                          | Other SSc patients                           | Intervention: 20<br>Control: 20                | Increase in mouth opening                                    | 11<br>I | Maddali Bongi, 2011 [119] |
| P: Daily home programme (warm gloves, Thai massage, stretching)<br>C: Same programme without gloves                                                                                                  | Other SSc patients                           | Intervention: 14<br>Control: 14                | Improvement of hand mobility                                 | 11<br>W | Vannajak, 2014 [163]      |

| Intervention/management strategy                                                                                                                                                                     | Comparator                     | N                                | Aim of management                                            | SD&OA*  | Reference                    |
|------------------------------------------------------------------------------------------------------------------------------------------------------------------------------------------------------|--------------------------------|----------------------------------|--------------------------------------------------------------|---------|------------------------------|
| P: Osteopathic manipulative treatment<br>C: N/A: intraindividual assessment                                                                                                                          | N/A intraindividual assessment | Intervention: 6<br>Control: N/A  | Improvement of hand mobility                                 | 4<br>I  | O'Connor, 2016 [164]         |
| P: Hand stretching & hip exercise, ergotherapy, thermal & mud bath, whirlpool therapy, soft tissue massage of the hands and joints<br>C: Same as intervention, but excluding treatment of the hands. | Other SSC patients             | Intervention: 31<br>Control: 22  | Improvement of hand mobility                                 | 10<br>R | Horváth, 2017 [126]          |
| P: Manual therapy and physiotherapy, three weeks every year for three years<br>C: N/A: intraindividual assessment                                                                                    | N/A intraindividual assessment | Intervention: 43<br>Control: N/A | Development of a personalised rehabilitation programme       | 10<br>R | Brignoli, 2018 [129]         |
| <b>Dietary therapy and nutrition</b>                                                                                                                                                                 |                                |                                  |                                                              |         |                              |
| P: Probiotics<br>C: N/A: intraindividual assessment                                                                                                                                                  | N/A intraindividual assessment | Intervention: 10<br>Control: N/A | Improvement of gastrointestinal symptoms and quality of life | 10<br>I | Frech, 2011 [165]            |
| P: Individually adapted nutritional intervention<br>C: N/A: intraindividual assessment                                                                                                               | N/A intraindividual assessment | Intervention: 9<br>Control: N/A  | Improvement of nutritional status                            | 10<br>I | Ortiz-Santamaria, 2014 [166] |
| P: Medical nutrition therapy<br>C: N/A: intraindividual assessment                                                                                                                                   | N/A intraindividual assessment | Intervention: 18<br>Control: N/A | Improvement of nutritional status                            | 10<br>I | Doerfler, 2017 [167]         |
| P: Probiotics<br>C: Placebo                                                                                                                                                                          | Other SSC patients             | Intervention: 19<br>Control: 21  | Improvement of gastrointestinal symptoms                     | 11<br>I | Low, 2019 [168]              |
| P: Probiotics<br>C: Placebo                                                                                                                                                                          | Other SSC patients             | Intervention: 37<br>Control: 36  | Improvement of gastrointestinal symptoms                     | 11<br>W | Marighela, 2019 [169]        |
| P: Faecal microbiota transplantation<br>C: Placebo                                                                                                                                                   | Other SSC patients             | Intervention: 5<br>Control: 4    | Improvement of gastrointestinal symptoms                     | 11<br>I | Fretheim, 2020 [170]         |
| <b>Phototherapy and laser treatment</b>                                                                                                                                                              |                                |                                  |                                                              |         |                              |
| P: Infrared A (IRA)<br>C: N/A: intraindividual assessment                                                                                                                                            | N/A intraindividual assessment | Intervention: 58<br>Control: N/A | Reduction of Raynaud's phenomenon                            | 10<br>I | Foerster, 2005 [171]         |
| P: Intense pulsed light (IPL)<br>C: N/A: intraindividual assessment                                                                                                                                  | N/A intraindividual assessment | Intervention: 20<br>Control: N/A | Resolution of telangiectases                                 | 10<br>R | Murray, 2012 [172]           |
| P: Pulsed dye laser & intense pulsed light (PDL & IPL)<br>C: N/A: intraindividual assessment                                                                                                         | N/A intraindividual assessment | Intervention: 19<br>Control: N/A | Resolution of telangiectases                                 | 10<br>I | Dinsdale, 2014 [173]         |
| P: Pulsed dye laser (PDL)<br>C: N/A: intraindividual assessment                                                                                                                                      | N/A intraindividual assessment | Intervention: 23<br>Control: N/A | Resolution of telangiectases                                 | 4<br>I  | Burillo-Martinez, 2017 [174] |
| P: Intense pulsed light (IPL)<br>C: N/A: intraindividual assessment                                                                                                                                  | N/A intraindividual assessment | Intervention: 15<br>Control: 5   | Change in skin sclerosis                                     | 10<br>I | Rosholm Comstedt, 2017 [175] |
| P: Low level light therapy (IR + red + blue)<br>C: N/A: intraindividual assessment                                                                                                                   | N/A intraindividual assessment | Intervention: 8<br>Control: N/A  | Resolution of skin ulcers                                    | 10<br>R | Hughes, 2019 [176]           |

| Intervention/management strategy                                                                                   | Comparator                     | N                                | Aim of management                          | SD&OA*  | Reference              |
|--------------------------------------------------------------------------------------------------------------------|--------------------------------|----------------------------------|--------------------------------------------|---------|------------------------|
| <b>Shockwave therapy</b>                                                                                           |                                |                                  |                                            |         |                        |
| P: ESWT with pressure pulses<br>C: N/A: intraindividual assessment                                                 | N/A intraindividual assessment | Intervention: 30<br>Control: N/A | Change in skin sclerosis                   | 10<br>I | Tinazzi, 2011 [177]    |
| P: ESWT<br>C: N/A: intraindividual assessment                                                                      | N/A intraindividual assessment | Intervention: 8<br>Control: N/A  | Improvement of skin sclerosis              | 10<br>I | Belloli, 2013 [178]    |
| P: ESWT for digital ulcers in SSc<br>C: Usual care                                                                 | Other SSc patients             | Intervention: 9<br>Control: 14   | Resolution of skin ulcers                  | 10<br>I | Saito, 2016 [179]      |
| P: ESWT for digital ulcers in SSc<br>C: N/A: intraindividual assessment                                            | N/A intraindividual assessment | Intervention: 9<br>Control: N/A  | Resolution of skin ulcers                  | 10<br>I | Saito, 2016 [180]      |
| <b>Healthcare models</b>                                                                                           |                                |                                  |                                            |         |                        |
| P: Customized intervention for dental hygiene and upper extremity's function<br>C: N/A: intraindividual assessment | N/A intraindividual assessment | Intervention: 17<br>Control: N/A | Improvement of oral hygiene                | 10<br>I | Poole, 2010 [181]      |
| P: Multidisciplinary disease management programme<br>C: N/A: intraindividual assessment                            | N/A intraindividual assessment | Intervention: 41<br>Control: N/A | To improve mental health                   | 10<br>R | Kwakkenbos, 2011 [145] |
| P: Multidisciplinary team care<br>C: Usual care                                                                    | Other SSc patients             | Intervention: 28<br>Control: 25  | Reduction of functional impairment         | 11<br>I | Schouffoer, 2011 [182] |
| <b>Hyperbaric oxygen or ozone therapy</b>                                                                          |                                |                                  |                                            |         |                        |
| P: Hyperbaric oxygen therapy<br>C: N/A: intraindividual assessment                                                 | N/A intraindividual assessment | Intervention: 6<br>Control: N/A  | Resolution of skin ulcers                  | 4<br>I  | Mirasoglu, 2017 [183]  |
| P: Oxygen-ozone therapy<br>C: Usual care                                                                           | Other SSc patients             | Intervention: 25<br>Control: 25  | Resolution of skin ulcers                  | 11<br>W | Hassanien, 2018 [184]  |
| P: Ozone bath, 2 series of 10 days per series with 10 days apart<br>C: N/A: intraindividual assessment             | N/A intraindividual assessment | Intervention: 42<br>Control: N/A | Reduced expression of inflammatory markers | 10<br>I | Nowicka, 2019 [155]    |
| <b>Oral hygiene</b>                                                                                                |                                |                                  |                                            |         |                        |
| P: Customized intervention for dental hygiene and upper extremity's function<br>C: N/A: intraindividual assessment | N/A intraindividual assessment | Intervention: 17<br>Control: N/A | Improvement of oral hygiene                | 10<br>I | Poole, 2010 [181]      |
| P: Multi-faceted oral health intervention<br>C: Usual care                                                         | Other SSc patients             | Intervention: 26<br>Control: 22  | Improvement of oral hygiene                | 11<br>W | Yuen, 2011 [121]       |
| P: Xylitol chewing gum<br>C: Xylitol mouth rinse                                                                   | Other SSc patients             | Intervention: 6<br>Control: 7    | Improvement of oral hygiene                | 11<br>I | Yuen, 2012 [185]       |
| <b>Others</b>                                                                                                      |                                |                                  |                                            |         |                        |
| P: Autologous fat transplantation, two times three months apart<br>C: N/A: intraindividual assessment              | N/A intraindividual assessment | Intervention: 10<br>Control: N/A | Improvement of microstomia                 | 4<br>I  | Onesti, 2016 [186]     |
| P: Neuromuscular taping<br>C: N/A: intraindividual assessment                                                      | N/A intraindividual assessment | Intervention: 53<br>Control: N/A | Improvement of hand mobility               | 10<br>I | Parisi, 2017 [187]     |



| Intervention/management strategy                                                                                                                                   | Comparator                     | N                                             | Aim of management         | SD&OA*  | Reference         |
|--------------------------------------------------------------------------------------------------------------------------------------------------------------------|--------------------------------|-----------------------------------------------|---------------------------|---------|-------------------|
| P: Animal-assisted intervention session with multidisciplinary team, weekly for 20 weeks<br>C:<br>C1: alternative social activity (cooking)<br>C2: No intervention | Other SSc patients             | Intervention: 14<br>Control: C1: 14<br>C2: 14 | Management of anxiety     | 10<br>I | Fiori, 2018 [188] |
| P: Application of amniotic membrane to skin ulcers<br>C: N/A: intraindividual assessment                                                                           | N/A intraindividual assessment | Intervention: 6<br>Control: N/A               | Resolution of skin ulcers | 10<br>I | Frech, 2019 [189] |

\*Study design and overall appraisal (adapted from the Joanna Briggs Institute Manual for Evidence Synthesis [190]):

| Notation | Study design                                     |
|----------|--------------------------------------------------|
| 1        | Analytical cross-sectional study                 |
| 2        | Case-control study                               |
| 3        | Case report                                      |
| 4        | Case series                                      |
| 5        | Cohort study                                     |
| 6        | Diagnostic test accuracy study                   |
| 7        | Economic evaluation                              |
| 8        | Prevalence study                                 |
| 9        | Qualitative research                             |
| 10       | Quasi-experimental study                         |
| 11       | Randomised controlled trial                      |
| 12       | Meta-analysis, with or without systematic review |

| Notation | Overall appraisal |
|----------|-------------------|
| R        | Robust            |
| I        | Intermediate      |
| W        | Weak              |

#### Abbreviations:

6MWT: 6 minutes walking test; abPGSSGA: Abridged Scored Patient-Generated Subjective Global Assessment; AC: acupuncture; ADL: activities in daily living; ANA: anti-nuclear antibody; aPL: antiphospholipid; AUC: area under the curve; BASS: Body Area Satisfaction Scale; BDI: Beck Depression Inventory; BF: breathing frequency; BF/CBT: Biofeedback-assisted cognitive-behavioural treatment; BMD: bone mineral density; BMI: body mass index; BP: bodily pain; BPI: Brief Pain Inventory; C: intervention/management strategy for the comparator group C3: complement component 3; C4: complement component 4; CASE: Children's Arthritis Self-Efficacy scale; CAT: complementary and alternative therapies; CC: calcinosis cutis; CCL4: chemokine (C-C motif) ligands 4; CECs: circulating endothelial cells; CES-D: Center for Epidemiological Studies-Depression; CT: cardiovascular training; CI: confidence interval; CLASI: cutaneous lupus erythematosus disease area and severity index; CRP: C-reactive protein; DAS28: Disease Activity Score-28; DASH: Disabilities of the Arm, Shoulder and Hand; DHA: docosahexaenoic acid; dsDNA: double-stranded DNA; DU: digital ulcers; ECLAM: European Consensus Lupus Activity Measurement; EPA: eicosapentaenoic acid; EPCs: endothelial progenitor cells; ER admission: emergency room admission; ES: effect size; ESR: erythrocyte sedimentation rate; ESWT: extracorporeal shock wave therapy; FACIT: Functional Assessment of Chronic Illness Therapy; FISI: Fecal Incontinence Severity Index; FMD: flow-mediated dilation; FSS: Fatigue Severity Scale; GFR: glomerular filtration rate; GH: general health; GHQ: General Health Questionnaire; GI: gingival index; GIT score: gastrointestinal tract score; HADS: Hospital Anxiety and Depression Scale; HAMIS: Hand Mobility in Scleroderma; HAQ: Health Assessment Questionnaire; HAQ-DI: HAQ-Disability Index; HDL: high-density lipoprotein; HeiQ: Health Education Impact Questionnaire; Hg: mercury; HOMA IR: Homeostatic Model Assessment for Insulin Resistance; HR: hazard ratio; HR: heart rate; HRQoL: health-related quality of life; hsCRP: high sensitivity C-reactive protein; IFN: interferon; Ig: immunoglobulin; IID: interincisal distance; IL: interleukin; IPL: intense pulsed light; IQR: interquartile range; IRR: incidence rate ratio; ITT: intention-to-treat; LDI: laser Doppler imaging; LDL: low-density lipoprotein; LE: lupus erythematosus; Lstren: lip strength; MN: minimal needling; MASRI: Medication

Adherence Self-Report Inventory; MCID: minimal clinically important difference; METS: metabolic equivalent of task; MH: mental health; MHAQ: Modified Health Assessment Questionnaire; MHSS: Mouth Handicap in Systemic Sclerosis; MI-RSWB: Multidimensional Inventory of Religious/Spiritual Well-Being; MMO: maximal mouth opening; MPO: Myeloperoxidase; MPR: medication possession ratio; mRSS: modified Rodnan Skin Score; MSI: Mental Synthetic Index; MUFA: monounsaturated fatty acids; MxA: myxovirus protein A; Ns: not significant; OCT: optical coherence tomography; P: intervention/management strategy for the population under investigation; PCS: mental component summary; PDL: pulsed-dye laser; PETCO<sub>2</sub>: end-tidal carbon dioxide pressure; PF: physical functioning; PGA: Physician Global Assessment; PH: physical health; PHP: Patient Hygiene Performance; PROMIS: Patient-Reported Outcomes Measurement Information System; PSI: Physical Synthetic Index; PSQ: Perceived Severity of Stress Questionnaire; PSQI: Pittsburgh Sleep Quality Index; PSS: Perceived Stress Scale; PtGA: Patient Global Assessment; PUFA: polyunsaturated fatty acids; PUVA: psoralen and ultraviolet A; PWC75%/kg: physical working capacity measured at 75% of the predicted maximal heart rate; RCP: respiratory compensation point; RCT: randomised clinical trial; RNP: ribonucleoprotein; ROM: range of motion; RP: role physical; RR: relative risk; RSE: Rosenberg Self-Esteem Scale; RT: resistance training; SDI: SLICC/ACR Damage Index; SE scale: Chronic Disease Self-Efficacy Scale; SEF: second self-efficacy for performing functions; SEOS: Self-Efficacy for controlling Other Symptoms; SEP: Self-Efficacy Perception for controlling pain; SF-36: short-form 36; SF-MPQ: Short-Form McGill Pain Questionnaire; SFA: saturated fatty acids; SFAQ: Scleroderma Functional Assessment Questionnaire; SGRQ: St. George's Respiratory Questionnaire; SIBID: Situational Inventory of Body Image Dysphoria; sICAM: soluble intracellular cellular adhesion molecule; SLAM: Systemic Lupus Activity Measure; SLAQ: Systemic Lupus Activity Questionnaire; SLE: systemic lupus erythematosus; SLEDAI: Systemic Lupus Erythematosus Disease Activity Index; Sm: Smith; SM: Social media; SMILEY: Simple Measure of the Impact of Lupus Erythematosus in Youngsters; SMS: Symptom-monitoring Support; SSc: systemic sclerosis; SSSLSS: Scleroderma Support Group Leader Self-efficacy Scale; Std: standard; sTNFR: soluble tumour necrosis factor receptor; taVNS: Transcutaneous auricular vagus nerve stimulation; TCM: traditional Chinese medicine; TE: expiratory time; TG: triglycerides; TI: inspiratory time; TLR: toll-like receptor; TNF: tumour necrosis factor; TOT: total respiratory time; Tprot: tongue protrusion; Tstren: tongue strength; TUG: Timed Up and Go; UC: usual care; UCLA GIT: University of California Los Angeles Scleroderma Clinical Trials Consortium Gastrointestinal Tract; UVA1: ultraviolet A1; VAS: visual analogue scale; VAT: ventilatory anaerobic threshold; VE/VCO<sub>2</sub>: ventilatory equivalent for carbon dioxide; VLDL: very low-density lipoprotein; VO<sub>2</sub> max: maximal oxygen consumption; VT: tidal volume; VT: vitality; W: week; WHOQOL: World Health Organization Quality of Life Instrument.

**References:**

1. Ramsey-Goldman R, Schilling EM, Dunlop D, Langman C, Greenland P, Thomas RJ, et al. A pilot study on the effects of exercise in patients with systemic lupus erythematosus. *Arthritis Care & Research*. 2000 2000; 13(5):262-269.
2. Tench CM, McCarthy J, McCurdie I, White PD, D'Cruz DP. Fatigue in systemic lupus erythematosus: a randomized controlled trial of exercise. *Rheumatology*. 2003 2003; 42(9):1050-1054.
3. Carvalho MR, Sato EI, Tebexreni AS, Heidecher RT, Schenkman S, Neto TL. Effects of supervised cardiovascular training program on exercise tolerance, aerobic capacity, and quality of life in patients with systemic lupus erythematosus. *Arthritis & Rheumatism*. 2005 2005; 53(6):838-844.
4. Clarke-Jenssen AC, Fredriksen PM, Lilleby V, Mengshoel AM. Effects of supervised aerobic exercise in patients with systemic lupus erythematosus: a pilot study. *Arthritis & Rheumatism*. 2005 2005; 53(2):308-312.
5. do Prado DM, Gualano B, Miossi R, Lima FR, Roschel H, Borba E, et al. Erratic control of breathing during exercise in patients with systemic lupus erythematosus: a pilot-study. *Lupus*. 2011 2011; 20(14):1535-1540.
6. Otto AD, Mishler AE, Shah N, Krug MM, Phillips A, Wilson N, et al. Feasibility of Implementing a Lifestyle Intervention in Overweight and Obese Patients with Systemic Lupus Erythematosus. *Medicine & Science in Sports & Exercise*. 2011 2011; 43:123-123.
7. Yuen HK, Holthaus K, Kamen DL, Sword DO, Breland HL. Using Wii Fit to reduce fatigue among African American women with systemic lupus erythematosus: a pilot study. *Lupus*. 2011 2011; 20(12):1293-1299.
8. Miossi R, Benatti FB, Lucidade de Sa Pinto A, Lima FR, Borba EF, Prado DM, et al. Using exercise training to counterbalance chronotropic incompetence and delayed heart rate recovery in systemic lupus erythematosus: a randomized trial. *Arthritis care & research*. 2012 2012; 64(8):1159-1166.
9. da Silva AE, dos Reis-Neto ET, da Silva NP, Sato EI. The effect of acute physical exercise on cytokine levels in patients with systemic lupus erythematosus. *Lupus*. 2013 2013; 22(14):1479-1483.
10. dos Reis-Neto ET, da Silva AE, Monteiro CM, de Camargo LM, Sato EI. Supervised physical exercise improves endothelial function in patients with systemic lupus erythematosus. *Rheumatology*. 2013 2013; 52(12):2187-2195.
11. Barnes JN, Nualnim N, Dhindsa M, Renzi CP, Tanaka H. Macro- and microvascular function in habitually exercising systemic lupus erythematosus patients. *Scandinavian Journal of Rheumatology*. 2014 2014; 43(3):209-216.
12. Perandini LA, Sales-de-Oliveira D, Mello SB, Camara NO, Benatti FB, Lima FR, et al. Exercise training can attenuate the inflammatory milieu in women with systemic lupus erythematosus. *Journal of Applied Physiology*. 2014 2014; 117(6):639-647.
13. Benatti FB, Miossi R, Passarelli M, Nakandakare ER, Perandini L, Lima FR, et al. The effects of exercise on lipid profile in systemic lupus erythematosus and healthy individuals: a randomized trial. *Rheumatology International*. 2015 2015; 35(1):61-69.
14. Bogdanovic G, Stojanovich L, Djokovic A, Stanisavljevic N. Physical Activity Program Is Helpful for Improving Quality of Life in Patients with Systemic Lupus Erythematosus. *Tohoku Journal of Experimental Medicine*. 2015 2015; 237(3):193-199.
15. Perandini LA, Sales-de-Oliveira D, Mello S, Camara NO, Benatti FB, Lima FR, et al. Inflammatory cytokine kinetics to single bouts of acute moderate and intense aerobic exercise in women with active and inactive systemic lupus erythematosus. *Exercise Immunology Review*. 2015 2015; 21:174-185.
16. Abrahao MI, Gomiero AB, Peccin MS, Grande AJ, Trevisani VF. Cardiovascular training vs. resistance training for improving quality of life and physical function in patients with systemic lupus erythematosus: a randomized controlled trial. *Scandinavian Journal of Rheumatology*. 2016 2016; 45(3):197-201.
17. Avaux M, Hoellinger P, Nieuwland-Husson S, Fraselie V, Depresseux G, Houssiau FA. Effects of two different exercise programs on chronic fatigue in lupus patients. *Acta Clinica Belgica*. 2016 2016; 71(6):403-406.
18. Bostrom C, Elfving B, Dupre B, Opava CH, Lundberg IE, Jansson E. Effects of a one-year physical activity programme for women with systemic lupus erythematosus - a randomized controlled study. *Lupus*. 2016 2016; 25(6):602-616.
19. Perandini LA, Sales-de-Oliveira D, Almeida DC, Azevedo H, Moreira-Filho CA, Cenedeze MA, et al. Effects of acute aerobic exercise on leukocyte inflammatory gene expression in systemic lupus erythematosus. *Exercise Immunology Review*. 2016 2016; 22:64-81.
20. O'Dwyer T, Durcan L, Wilson F. Exercise and physical activity in systemic lupus erythematosus: A systematic review with meta-analyses. *Seminars in Arthritis & Rheumatism*. 2017 2017; 47(2):204-215.
21. Wu ML, Yu KH, Tsai JC. The Effectiveness of Exercise in Adults With Systemic Lupus Erythematosus: A Systematic Review and Meta-Analysis to Guide Evidence-Based Practice. *Worldviews on Evidence-Based Nursing*. 2017 2017; 14(4):306-315.
22. Benatti FB, Miyake CNH, Dantas WS, Zambelli VO, Shinjo SK, Pereira RM, et al. Exercise Increases Insulin Sensitivity and Skeletal Muscle AMPK Expression in Systemic Lupus Erythematosus: A Randomized Controlled Trial. *Frontiers in Immunology*. 2018 2018; 9:906.

23. Middleton KR, Haaz Moonaz S, Hasni SA, Magana Lopez M, Tataw-Ayuketah G, Farmer N, et al. Yoga for systemic lupus erythematosus (SLE): Clinician experiences and qualitative perspectives from students and yoga instructors living with SLE. *Complementary Therapies in Medicine*. 2018 2018; 41:111-117.
24. Soriano-Maldonado A, Morillas-de-Laguno P, Sabio JM, Gavilan-Carrera B, Rosales-Castillo A, Montalban-Mendez C, et al. Effects of 12-week Aerobic Exercise on Arterial Stiffness, Inflammation, and Cardiorespiratory Fitness in Women with Systemic LUPUS Erythematosus: Non-Randomized Controlled Trial. *Journal of Clinical Medicine*. 2018 2018; 7(12):24.
25. Timoteo RP, Silva AF, Micheli DC, Candido Murta EF, Freire M, Teodoro RB, et al. Increased flexibility, pain reduction and unaltered levels of IL-10 and CD11b + lymphocytes in patients with systemic lupus erythematosus were associated with kinesiotherapy. *Lupus*. 2018 2018; 27(7):1159-1168.
26. da Hora TC, Lima K, Maciel R. The effect of therapies on the quality of life of patients with systemic lupus erythematosus: a meta-analysis of randomized trials. *Advances in Rheumatology*. 2019 2019; 59(1):34.
27. Sheikh SZ, Kaufman K, Gordon BB, Hicks S, Love A, Walker J, et al. Evaluation of the self-directed format of Walk With Ease in patients with systemic lupus erythematosus: the Walk-SLE Pilot Study. *Lupus*. 2019 2019; 28(6):764-770.
28. Wu ML, Tsai JC, Yu KH, Chen JJ. Effects of physical activity counselling in women with systemic lupus erythematosus: A randomized controlled trial. *International Journal of Nursing Practice*. 2019 2019; 25(5):e12770.
29. Gavilan-Carrera B, Vargas-Hitos JA, Morillas-de-Laguno P, Rosales-Castillo A, Sola-Rodriguez S, Callejas-Rubio JL, et al. Effects of 12-week aerobic exercise on patient-reported outcomes in women with systemic lupus erythematosus. *Disability & Rehabilitation*. 2020 2020:1-9.
30. Keramiotou K, Anagnostou C, Kataxaki E, Galanos A, Sfrikakis PP, Tektonidou MG. The impact of upper limb exercise on function, daily activities and quality of life in systemic lupus erythematosus: a pilot randomised controlled trial. *RMD Open*. 2020 2020; 6(1):01.
31. Dionello CF, Souza PL, Rosa PV, Santana A, Marchon R, Morel DS, et al. Acute Neuromuscular Responses to Whole-Body Vibration of Systemic Lupus Erythematosus Individuals: A Randomized Pilot Study. *Applied Sciences-Basel*. 2021 2021; 11(1).
32. Kao VP, Wen HJ, Pan YJ, Pai CS, Tsai ST, Su KY. Combined aerobic and resistance training improves physical and executive functions in women with systemic lupus erythematosus. *Lupus*. 2021 2021; 30(6):946-955.
33. Lopes-Souza P, Dionello CF, Bernardes-Oliveira CL, Moreira-Marconi E, Marchon RM, Teixeira-Silva Y, et al. Effects of 12-week whole-body vibration exercise on fatigue, functional ability and quality of life in women with systemic lupus erythematosus: A randomized controlled trial. *Journal of Bodywork and Movement Therapies*. 2021 2021; 27:191-199.
34. Patterson SL, Trupin L, Yazdany J, Dall'Era M, Lanata C, Dequattro K, et al. Physical Inactivity Independently Predicts Incident Depression in a Multi-Racial/Ethnic Systemic Lupus Cohort. *Arthritis care & research*. 2021 2021; 9:09.
35. Sohng KY. Effects of a self-management course for patients with systemic lupus erythematosus. *Journal of Advanced Nursing*. 2003 2003; 42(5):479-486.
36. Brown SJ, Somerset ME, McCabe CS, McHugh NJ. The impact of group education on participants' management of their disease in lupus and scleroderma. *Musculoskeletal Care*. 2004 2004; 2(4):207-217.
37. Harrison MJ, Morris KA, Horton R, Togliola J, Barsky J, Chait S, et al. Results of intervention for lupus patients with self-perceived cognitive difficulties. *Neurology*. 2005 2005; 65(8):1325-1327.
38. Miljeteig K, Graue M. Evaluation of a multidisciplinary patient education program for people with systemic lupus erythematosus. *Journal of Nursing & Healthcare of Chronic Illnesses*. 2009 2009; 1(1):87-95.
39. Drenkard C, Dunlop-Thomas C, Easley K, Bao G, Brady T, Lim SS. Benefits of a self-management program in low-income African-American women with systemic lupus erythematosus: results of a pilot test. *Lupus*. 2012 2012; 21(14):1586-1593.
40. Ganachari MS, Almas SA. Evaluation of clinical pharmacist mediated education and counselling of systemic lupus erythematosus patients in tertiary care hospital. *Indian Journal of Rheumatology*. 2012 2012; 7(1):7-12.
41. Ting TV, Kudalkar D, Nelson S, Cortina S, Pendl J, Budhani S, et al. Usefulness of cellular text messaging for improving adherence among adolescents and young adults with systemic lupus erythematosus. *Journal of Rheumatology*. 2012 2012; 39(1):174-179.
42. Williams EM, Bruner L, Penfield M, Kamen D, Oates JC. Stress and Depression in Relation to Functional Health Behaviors in African American Patients with Systemic Lupus Erythematosus. *Rheumatology (Sunnyvale)*. 2014; 2014(Suppl 4).
43. Zhang X, Tian Y, Li J, Zhao X. Effect of targeted nursing applied to SLE patients. *Experimental & Therapeutic Medicine*. 2016 2016; 11(6):2209-2212.
44. O'Riordan R, Doran M, Connolly D. Fatigue and Activity Management Education for Individuals with Systemic Lupus Erythematosus. *Occupational Therapy International*. 2017 2017; 2017:4530104.
45. Yelnik CM, Richey M, Haiduc V, Everett S, Zhang M, Erkan D. Cardiovascular Disease Prevention Counseling Program for Systemic Lupus Erythematosus Patients. *Arthritis care & research*. 2017 2017; 69(8):1209-1216.
46. Kusnanto K, Sari N, Harmayetty H, Efendi F, Gunawan J. Self-care model application to improve self-care agency, self-care activities, and quality of life in patients with systemic lupus erythematosus. *Journal of Taibah University Medical Sciences*. 2018 2018; 13(5):472-478.
47. Scalzi LV, Hollenbeck CS, Mascuilli E, Olsen N. Improvement of medication adherence in adolescents and young adults with SLE using web-based education with and without a social media intervention, a pilot study. *Pediatric Rheumatology Online Journal*. 2018 2018; 16(1):18.
48. Williams EM, Hyer JM, Viswanathan R, Faith TD, Voronca D, Gebregziabher M, et al. Peer-to-Peer Mentoring for African American Women With Lupus: A Feasibility Pilot. *Arthritis care & research*. 2018 2018; 70(6):908-917.
49. Williams EM, Dismuke CL, Faith TD, Smalls BL, Brown E, Oates JC, et al. Cost-effectiveness of a peer mentoring intervention to improve disease self-management practices and self-efficacy among African American women with systemic lupus erythematosus: analysis of the Peer Approaches to Lupus Self-management (PALS) pilot study. *Lupus*. 2019 2019; 28(8):937-944.
50. Harry O, Crosby LE, Mara C, Ting TV, Huggins JL, Modi AC. Feasibility and acceptability of an innovative adherence intervention for young adults with childhood-onset systemic Lupus Erythematosus. *Pediatric Rheumatology Online Journal*. 2020 2020; 18(1):36.
51. Kankaya H, Karadakovan A. Effects of web-based education and counselling for patients with systemic lupus erythematosus: self-efficacy, fatigue and assessment of care. *Lupus*. 2020 Jul; 29(8):884-891.
52. Khan F, Granville N, Malkani R, Chathampally Y. Health-Related Quality of Life Improvements in Systemic Lupus Erythematosus Derived from a Digital Therapeutic Plus Tele-Health Coaching Intervention: Randomized Controlled Pilot Trial. *J Med Internet Res*. 2020 Oct 20; 22(10):e23868.
53. Allen KD, Beauchamp T, Rini C, Keefe FJ, Bennell KL, Cleveland RJ, et al. Pilot study of an internet-based pain coping skills training program for patients with systemic Lupus Erythematosus. *BMC Rheumatol*. 2021 Jun 17; 5(1):20.
54. White AA, Ba A, Faith TD, Ramakrishnan V, Dismuke-Greer CL, Oates JC, et al. The Care-coordination Approach to Learning Lupus Self-Management: a patient navigator intervention for systemic lupus inpatients. *Lupus Science & Medicine*. 2021 2021; 8(1).
55. Dobkin PL, Da Costa D, Joseph L, Fortin PR, Edworthy S, Barr S, et al. Counterbalancing patient demands with evidence: results from a pan-Canadian randomized clinical trial of brief supportive-expressive group psychotherapy for women with systemic lupus erythematosus. *Annals of Behavioral Medicine*. 2002 2002; 24(2):88-99.
56. Edworthy SM, Dobkin PL, Clarke AE, Da Costa D, Dritsa M, Fortin PR, et al. Group psychotherapy reduces illness intrusiveness in systemic lupus erythematosus. *Journal of Rheumatology*. 2003 2003; 30(5):1011-1016.

57. Greco CM, Rudy TE, Manzi S. Effects of a stress-reduction program on psychological function, pain, and physical function of systemic lupus erythematosus patients: a randomized controlled trial. *Arthritis & Rheumatism*. 2004 2004; 51(4):625-634.
58. Karlson EW, Liang MH, Eaton H, Huang J, Fitzgerald L, Rogers MP, et al. A randomized clinical trial of a psychoeducational intervention to improve outcomes in systemic lupus erythematosus. *Arthritis & Rheumatism*. 2004 2004; 50(6):1832-1841.
59. Goodman D, Morrissey S, Graham D, Bossingham D. The application of cognitive-behaviour therapy in altering illness representations of systemic lupus erythematosus. *Behaviour Change*. 2005 2005; 22(3):156-171.
60. Haupt M, Millen S, Janner M, Falagan D, Fischer-Betz R, Schneider M. Improvement of coping abilities in patients with systemic lupus erythematosus: a prospective study. *Annals of the Rheumatic Diseases*. 2005 2005; 64(11):1618-1623.
61. Ng P, Chan W. Group psychosocial program for enhancing psychological well-being of people with systemic lupus erythematosus. *Journal of Social Work in Disability & Rehabilitation*. 2007 2007; 6(3):75-87.
62. Navarrete-Navarrete N, Peralta-Ramirez MI, Sabio-Sanchez JM, Coin MA, Robles-Ortega H, Hidalgo-Tenorio C, et al. Efficacy of cognitive behavioural therapy for the treatment of chronic stress in patients with lupus erythematosus: a randomized controlled trial. *Psychotherapy & Psychosomatics*. 2010 2010; 79(2):107-115.
63. Navarrete-Navarrete N, Peralta-Ramirez MI, Sabio JM, Martinez-Egea I, Santos-Ruiz A, Jimenez-Alonso J. Quality-of-life predictor factors in patients with SLE and their modification after cognitive behavioural therapy. *Lupus*. 2010 2010; 19(14):1632-1639.
64. Brown RT, Shaftman SR, Tilley BC, Anthony KK, Kral MC, Maxson B, et al. The health education for lupus study: a randomized controlled cognitive-behavioral intervention targeting psychosocial adjustment and quality of life in adolescent females with systemic lupus erythematosus. *American Journal of the Medical Sciences*. 2012 2012; 344(4):274-282.
65. Zhang J, Wei W, Wang CM. Effects of psychological interventions for patients with systemic lupus erythematosus: a systematic review and meta-analysis. *Lupus*. 2012 2012; 21(10):1077-1087.
66. Jolly M, Peters KF, Mikolaitis R, Evans-Raoul K, Block JA. Body image intervention to improve health outcomes in lupus: a pilot study. *JCR: Journal of Clinical Rheumatology*. 2014 2014; 20(8):403-410.
67. Liang H, Tian X, Cao LY, Chen YY, Wang CM. Effect of psychological intervention on health-related quality of life in people with systemic lupus erythematosus: A systematic review. *International Journal of Nursing Sciences*. 2014 2014; 1(3):298-305.
68. Williams EM, Penfield M, Kamen D, Oates JC. An Intervention to Reduce Psychosocial and Biological Indicators of Stress in African American Lupus Patients: The Balancing Lupus Experiences with Stress Strategies Study. *Open J Prev Med*. 2014 Jan; 4(1):22-31.
69. Horesh D, Glick I, Taub R, Agmon-Levin N, Shoenfeld Y. Mindfulness-based group therapy for systemic lupus erythematosus: A first exploration of a promising mind-body intervention. *Complementary Therapies in Clinical Practice*. 2017 2017; 26:73-75.
70. Solati K, Mousavi M, Kheiri S, Hasanpour-Dehkordi A. The Effectiveness of Mindfulness-based Cognitive Therapy on Psychological Symptoms and Quality of Life in Systemic Lupus Erythematosus Patients: A Randomized Controlled Trial. *Oman Medical Journal*. 2017 2017; 32(5):378-385.
71. Conceição CTM, Meinão IM, Bombana JA, Sato EI. Psychoanalytic psychotherapy improves quality of life, depression, anxiety and coping in patients with systemic lupus erythematosus: a controlled randomized clinical trial. *Adv Rheumatol*. 2019 Jan 22; 59(1):4.
72. Kim HA, Seo L, Jung JY, Kim YW, Lee E, Cho SM, et al. Mindfulness-based cognitive therapy in Korean patients with systemic lupus erythematosus: A pilot study. *Complementary Therapies in Clinical Practice*. 2019 2019; 35:18-21.
73. Sahebari M, Asghari Ebrahimabad MJ, Ahmadi Shoraketokanlo A, Aghamohammadian Sharbaf H, Khodashahi M. Efficacy of Acceptance and Commitment Therapy in Reducing Disappointment, Psychological Distress, and Psychasthenia among Systemic Lupus Erythematosus (SLE) Patients. *Iranian Journal of Psychiatry*. 2019 2019; 14(2):130-136.
74. Xu HY, Teng Q, Zeng Y, Tian CP, Yang BW, Yao XL. Psychoeducational Intervention Benefits the Quality of Life of Patients with Active Systemic Lupus Erythematosus. *Journal of Nanomaterials*. 2021 2021; 2021.
75. Shah M, Kavanaugh A, Coyle Y, Adams-Huet B, Lipsky PE. Effect of a culturally sensitive cholesterol lowering diet program on lipid and lipoproteins, body weight, nutrient intakes, and quality of life in patients with systemic lupus erythematosus. *Journal of Rheumatology*. 2002 2002; 29(10):2122-2128.
76. Minami Y, Sasaki T, Arai Y, Kurisu Y, Hisamichi S. Diet and systemic lupus erythematosus: a 4 year prospective study of Japanese patients. *Journal of Rheumatology*. 2003 2003; 30(4):747-754.
77. Duffy EM, Meenagh GK, McMillan SA, Strain JJ, Hannigan BM, Bell AL. The clinical effect of dietary supplementation with omega-3 fish oils and/or copper in systemic lupus erythematosus. *Journal of Rheumatology*. 2004 2004; 31(8):1551-1556.
78. Shah M, Adams-Huet B, Kavanaugh A, Coyle Y, Lipsky P. Nutrient intake and diet quality in patients with systemic lupus erythematosus on a culturally sensitive cholesterol lowering dietary program. *Journal of Rheumatology*. 2004 2004; 31(1):71-75.
79. Aghdassi E, Morrison S, Landolt-Marticoena C, Su J, Pineau CA, Gladman D, et al. The use of micronutrient supplements is not associated with better quality of life and disease activity in Canadian patients with systemic lupus erythematosus. *J Rheumatol*. 2010 Jan; 37(1):87-90.
80. Minami Y, Hirabayashi Y, Nagata C, Ishii T, Harigae H, Sasaki T. Intakes of vitamin B6 and dietary fiber and clinical course of systemic lupus erythematosus: a prospective study of Japanese female patients. *Journal of Epidemiology*. 2011 2011; 21(4):246-254.
81. Davies RJ, Lomer MC, Yeo SI, Avloniti K, Sangle SR, D'Cruz DP. Weight loss and improvements in fatigue in systemic lupus erythematosus: a controlled trial of a low glycaemic index diet versus a calorie restricted diet in patients treated with corticosteroids. *Lupus*. 2012 2012; 21(6):649-655.
82. Elkan AC, Anania C, Gustafsson T, Jogestrand T, Hafstrom I, Frostegard J. Diet and fatty acid pattern among patients with SLE: associations with disease activity, blood lipids and atherosclerosis. *Lupus*. 2012 2012; 21(13):1405-1411.
83. Khajehdehi P, Zanjanejad B, Aflaki E, Nazarinia M, Azad F, Malekmakan L, et al. Oral supplementation of turmeric decreases proteinuria, hematuria, and systolic blood pressure in patients suffering from relapsing or refractory lupus nephritis: a randomized and placebo-controlled study. *Journal of Renal Nutrition*. 2012 2012; 22(1):50-57.
84. Everett ST, Wolf R, Contento I, Haiduc V, Richey M, Erkan D. Short-term patient-centered nutrition counseling impacts weight and nutrient intake in patients with systemic lupus erythematosus. *Lupus*. 2015 2015; 24(12):1321-1326.
85. Shamekhi Z, Amani R, Habibagahi Z, Namjooyan F, Ghadiri A, Saki Malehi A. A Randomized, Double-blind, Placebo-controlled Clinical Trial Examining the Effects of Green Tea Extract on Systemic Lupus Erythematosus Disease Activity and Quality of Life. *Phytotherapy Research*. 2017 2017; 31(7):1063-1071.
86. Rothman D, Khan F, Rudin V. Individualized Diet and Lifestyle Modifications Reverse Symptoms of Systemic Lupus Erythematosus. *Journal of Medical Internet Research*. 2018 2018; 20(9):21-21.
87. Pocovi-Gerardino G, Correa-Rodriguez M, Callejas-Rubio JL, Rios-Fernandez R, Martin-Amada M, Cruz-Caparrros MG, et al. Beneficial effect of Mediterranean diet on disease activity and cardiovascular risk in systemic lupus erythematosus patients: a cross-sectional study. *Rheumatology*. 2021 2021; 60(1):160-169.
88. Wen CP, Fan YS, Wang XC, Li XY, Lu KD. Effect of detoxification, removing stasis and nourishing yin method on corticosteroid-induced hyperlipidemia in patients with systemic lupus erythematosus. *Chinese Journal of Integrative Medicine*. 2007 2007; 13(3):180-184.
89. Greco CM, Kao AH, Maksimowicz-McKinnon K, Glick RM, Houze M, Sereika SM, et al. Acupuncture for systemic lupus erythematosus: a pilot RCT feasibility and safety study. *Lupus*. 2008 2008; 17(12):1108-1116.

90. Alvarez-Nemegyei J, Bautista-Botello A, Davila-Velazquez J. Association of complementary or alternative medicine use with quality of life, functional status or cumulated damage in chronic rheumatic diseases. *Clinical Rheumatology*. 2009 2009; 28(5):547-551.
91. Liao YN, Liu CS, Tsai TR, Hung YC, Chang SJ, Lin HL, et al. Preliminary study of a traditional Chinese medicine formula in systemic lupus erythematosus patients to taper steroid dose and prevent disease flare-up. *Kaohsiung Journal of Medical Sciences*. 2011 2011; 27(7):251-257.
92. Linda LDZ, Zhao Xiang B, Jun Hua G, Xin Z, Yu T, Jian Chun M, et al. Chinese Herbal Medicine (Zi Shen Qing) for Mild-to-Moderate Systematic Lupus Erythematosus: A Pilot Prospective, Single-Blinded, Randomized Controlled Study. *Evidence-based Complementary & Alternative Medicine (eCAM)*. 2013 2013; 2013:1-10.
93. Stege H, Budde MA, Grether-Beck S, Krutmann J. Evaluation of the capacity of sunscreens to photoprotect lupus erythematosus patients by employing the photoprovocation test. *Photodermatology, Photoimmunology & Photomedicine*. 2000 2000; 16(6):256-259.
94. Herzinger T, Plewig G, Rocken M. Use of sunscreens to protect against ultraviolet-induced lupus erythematosus. *Arthritis & Rheumatism*. 2004 2004; 50(9):3045-3046.
95. Szegedi A, Simics E, Aleksza M, Horkay I, Gaal K, Sipka S, et al. Ultraviolet-A1 phototherapy modulates Th1/Th2 and Tc1/Tc2 balance in patients with systemic lupus erythematosus. *Rheumatology*. 2005 2005; 44(7):925-931.
96. Zahn S, Graef M, Patsinakidis N, Landmann A, Surber C, Wenzel J, et al. Ultraviolet light protection by a sunscreen prevents interferon-driven skin inflammation in cutaneous lupus erythematosus. *Experimental Dermatology*. 2014 2014; 23(7):516-518.
97. Abdul Kadir WD, Jamil A, Shaharir SS, Md Nor N, Abdul Gafor AH. Photoprotection awareness and practices among patients with systemic lupus erythematosus and its association with disease activity and severity. *Lupus*. 2018 2018; 27(8):1287-1295.
98. Ward MM, Sundaramurthy S, Lotstein D, Bush TM, Neuwelt CM, Street RL, Jr. Participatory patient-physician communication and morbidity in patients with systemic lupus erythematosus. *Arthritis Rheum*. 2003 Dec 15; 49(6):810-818.
99. Sahebalzamani M, Farahani H, Jamarani MT, Faezi ST, Moradi K, Paragomi P. Effects of a Continuous Care Model on Patients' Knowledge and Health-Related Quality of Life in Systemic Lupus Erythematosus. *Rehabilitation Nursing Journal*. 2017 2017; 42(6):E9-E18.
100. Xie X, Song Y, Yang H, Nie A, Chen H, Li JP. Effects of transitional care on self-care, readmission rates, and quality of life in adult patients with systemic lupus erythematosus: a randomized controlled trial. *Arthritis Research & Therapy*. 2018 2018; 20(1):184.
101. Zhang L, Geng S, Qian L, Ye S, Wang X, Lu G, et al. Multidisciplinary care in patients with systemic lupus erythematosus: a randomized controlled trial in China. *Int J Clin Pharm*. 2019 Oct; 41(5):1247-1255.
102. Erceg A, Bovenschen HJ, van de Kerkhof PC, de Jong EM, Seyger MM. Efficacy and safety of pulsed dye laser treatment for cutaneous discoid lupus erythematosus. *Journal of the American Academy of Dermatology*. 2009 2009; 60(4):626-632.
103. Rerknimitr P, Tekacharin N, Panchaprateep R, Witsuwannakul J, Tangtanatakul P, Hirankarn N, et al. Pulsed-dye laser as an adjuvant treatment for discoid lupus erythematosus: a randomized, controlled trial. *Journal of Dermatological Treatment*. 2019 2019; 30(1):81-86.
104. Dorsey RR, Andresen EM, Moore TL. Health-related quality of life and support group attendance for patients with systemic lupus erythematosus. *JCR: Journal of Clinical Rheumatology*. 2004 2004; 10(1):6-9.
105. Li X, He L, Wang J, Wang M. Illness uncertainty, social support, and coping mode in hospitalized patients with systemic lupus erythematosus in a hospital in Shaanxi, China. *PLoS ONE [Electronic Resource]*. 2019 2019; 14(2):e0211313.
106. Bantornwan S, Watanapa WB, Hussarin P, Chatsirichaoenkul S, Larpparisuth N, Teerapornlertratt T, et al. Role of meditation in reducing sympathetic hyperactivity and improving quality of life in lupus nephritis patients with chronic kidney disease. *Journal of the Medical Association of Thailand*. 2014 2014; 97:S101-107.
107. Squance ML, Reeves G, Attia J, Bridgman H, Guest M. Self-reported Lupus flare: Association with everyday home and personal product exposure. *Toxicology Reports*. 2015 2015; 2:880-888.
108. Xu D, You X, Wang Z, Zeng Q, Xu J, Jiang L, et al. Chinese Systemic Lupus Erythematosus Treatment and Research Group Registry VI: Effect of Cigarette Smoking on the Clinical Phenotype of Chinese Patients with Systemic Lupus Erythematosus. *PLoS ONE [Electronic Resource]*. 2015 2015; 10(8):e0134451.
109. Abdelaziz SH, Elmetwaly OIA, Maged LA. Effect of using warm shower and warm water footbath with and without adding epsom salt on fatigue level in systemic lupus patients. *Indian Journal of Public Health Research and Development*. 2020 2020; 11(5):854-859.
110. Oliveira FAP, Santos F, Dias A, Neiva CLS, Telles RW, Lanna CCD. Cosmetic camouflage improves health-related quality of life in women with systemic lupus erythematosus and permanent skin damage: A controlled intervention study. *Lupus*. 2020 2020; 29(11):1438-1448.
111. Aranow C, Atish-Fregoso Y, Lesser M, Mackay M, Anderson E, Chavan S, et al. Transcutaneous auricular vagus nerve stimulation reduces pain and fatigue in patients with systemic lupus erythematosus: a randomised, double-blind, sham-controlled pilot trial. *Annals of the Rheumatic Diseases*. 2021 2021; 80(2):203-208.
112. Pizzo G, Scardina GA, Messina P. Effects of a nonsurgical exercise program on the decreased mouth opening in patients with systemic sclerosis. *Clinical Oral Investigations*. 2003 2003; 7(3):175-178.
113. Sandqvist G, Akesson A, Eklund M. Evaluation of paraffin bath treatment in patients with systemic sclerosis. *Disability & Rehabilitation*. 2004 2004; 26(16):981-987.
114. Mugii N, Hasegawa M, Matsushita T, Kondo M, Orito H, Yanaba K, et al. The efficacy of self-administered stretching for finger joint motion in Japanese patients with systemic sclerosis. *Journal of Rheumatology*. 2006 2006; 33(8):1586-1592.
115. Antonioli CM, Bua G, Frige A, Prandini K, Radici S, Scarsi M, et al. An individualized rehabilitation program in patients with systemic sclerosis may improve quality of life and hand mobility. *Clinical Rheumatology*. 2009 2009; 28(2):159-165.
116. Bongli SM, Del Rosso A, Galluccio F, Sigismondi F, Miniati I, Conforti ML, et al. Efficacy of connective tissue massage and Mc Mennell joint manipulation in the rehabilitative treatment of the hands in systemic sclerosis. *Clinical Rheumatology*. 2009 2009; 28(10):1167-1173.
117. Maddali Bongli S, Del Rosso A, Galluccio F, Tai G, Sigismondi F, Passalacqua M, et al. Efficacy of a tailored rehabilitation program for systemic sclerosis. *Clin Exp Rheumatol*. 2009 May-Jun; 27(3 Suppl 54):44-50.
118. Oliveira NC, dos Santos Sabbag LM, de Sá Pinto AL, Borges CL, Lima FR. Aerobic exercise is safe and effective in systemic sclerosis. *Int J Sports Med*. 2009 Oct; 30(10):728-732.
119. Maddali-Bongli S, Landi G, Galluccio F, Del Rosso A, Miniati I, Conforti ML, et al. The rehabilitation of facial involvement in systemic sclerosis: efficacy of the combination of connective tissue massage, Kabat's technique and kinesiotherapy: a randomized controlled trial. *Rheumatology International*. 2011 2011; 31(7):895-901.
120. Pinto AL, Oliveira NC, Gualano B, Christmann RB, Painelli VS, Artioli GG, et al. Efficacy and safety of concurrent training in systemic sclerosis. *Journal of Strength & Conditioning Research*. 2011 2011; 25(5):1423-1428.
121. Yuen HK, Weng Y, Bandyopadhyay D, Reed SG, Leite RS, Silver RM. Effect of a multi-faceted intervention on gingival health among adults with systemic sclerosis. *Clinical & Experimental Rheumatology*. 2011 2011; 29(2):S26-32.
122. Yuen HK, Marlow NM, Reed SG, Mahoney S, Summerlin LM, Leite R, et al. Effect of orofacial exercises on oral aperture in adults with systemic sclerosis. *Disability & Rehabilitation*. 2012 2012; 34(1):84-89.
123. Piga M, Tradori I, Pani D, Barabino G, Dessi A, Raffo L, et al. Telemedicine applied to kinesiotherapy for hand dysfunction in patients with systemic sclerosis and rheumatoid arthritis: recovery of movement and telemonitoring technology. *Journal of Rheumatology*. 2014 2014; 41(7):1324-1333.



124. Lima TR, Guimaraes FS, Carvalho MN, Sousa TL, Menezes SL, Lopes AJ. Lower limb muscle strength is associated with functional performance and quality of life in patients with systemic sclerosis. *Brazilian Journal of Physical Therapy*. 2015 2015; 19(2):129-136.
125. Stefanantoni K, Sciarra I, Iannace N, Vasile M, Caucci M, Sili Scavalli A, et al. Occupational therapy integrated with a self-administered stretching program on systemic sclerosis patients with hand involvement. *Clin Exp Rheumatol*. 2016 Sep-Oct; 34 Suppl 100(5):157-161.
126. Horváth J, Bálint Z, Szép E, Deisinger A, Minier T, Farkas N, et al. Efficacy of intensive hand physical therapy in patients with systemic sclerosis. *Clin Exp Rheumatol*. 2017 Sep-Oct; 35 Suppl 106(4):159-166.
127. Rannou F, Boutron I, Mouthon L, Sanchez K, Tiffreau V, Hachulla E, et al. Personalized Physical Therapy Versus Usual Care for Patients With Systemic Sclerosis: A Randomized Controlled Trial. *Arthritis care & research*. 2017 2017; 69(7):1050-1059.
128. Azar M, Rice DB, Kwakkenbos L, Carrier ME, Shrier I, Bartlett SJ, et al. Exercise habits and factors associated with exercise in systemic sclerosis: a Scleroderma Patient-centered Intervention Network (SPIN) cohort study. *Disability & Rehabilitation*. 2018 2018; 40(17):1997-2003.
129. Brignoli E, Frassanito P, Vercesi E, Ferretti C, Felicetti G, Maestri R, et al. Rehabilitation in systemic sclerosis: proposed personalised rehabilitation programme. *G Ital Med Lav Ergon*. 2018 Dec; 40(4):248-256.
130. Mitropoulos A, Gumber A, Crank H, Akil M, Klonizakis M. The effects of upper and lower limb exercise on the microvascular reactivity in limited cutaneous systemic sclerosis patients. *Arthritis Res Ther*. 2018 Jun 5; 20(1):112.
131. Murphy SL, Barber MW, Homer K, Dodge C, Cutter GR, Khanna D. Occupational Therapy Treatment to Improve Upper Extremity Function in Individuals with Early Systemic Sclerosis: A Pilot Study. *Arthritis care & research*. 2018 2018; 70(11):1653-1660.
132. Gregory WJ, Wilkinson J, Herrick AL. A randomised controlled trial of wax baths as an additive therapy to hand exercises in patients with systemic sclerosis. *Physiotherapy*. 2019 2019; 105(3):370-377.
133. Kristensen LQ, Oestergaard LG, Bovbjerg K, Rolving N, Søndergaard K. Use of paraffin instead of lukewarm water prior to hand exercises had no additional effect on hand mobility in patients with systemic sclerosis: A randomized clinical trial. *Hand Therapy*. 2019 2019; 24(1):13-21.
134. Landim SF, Bertolo MB, Marcatto de Abreu MF, Del Rio AP, Mazon CC, Marques-Neto JF, et al. The evaluation of a home-based program for hands in patients with systemic sclerosis. *Journal of Hand Therapy*. 2019 2019; 32(3):313-321.
135. Mitropoulos A, Gumber A, Akil M, Klonizakis M. Exploring the microcirculatory effects of an exercise programme including aerobic and resistance training in people with limited cutaneous systemic sclerosis. *Microvasc Res*. 2019 Sep; 125:103887.
136. Cetin SY, Calik BB, Ayan A. Investigation of the effectiveness of Tai Chi exercise program in patients with scleroderma: A randomized controlled study. *Complementary Therapies in Clinical Practice*. 2020 2020; 40:101181.
137. Filippetti M, Cazzoletti L, Zamboni F, Ferrari P, Caimmi C, Smania N, et al. Effect of a tailored home-based exercise program in patients with systemic sclerosis: A randomized controlled trial. *Scandinavian Journal of Medicine & Science in Sports*. 2020 2020; 30(9):1675-1684.
138. S FL, M BB, Del Rio AP, Sachetto Z, Zonzini Gaino J, J LP, et al. Sustained efficacy of a concise self-management programme for hands in systemic sclerosis: a longitudinal case-control observational study. *Rheumatology*. 2020 2020; 59(11):3330-3339.
139. Cüzdan N, Türk İ, Çiftçi V, Arslan D, Doğan MC, Ünal İ. The effect of a home-based orofacial exercise program on oral aperture of patients with systemic sclerosis: A single-blind prospective randomized controlled trial. *Archives of Rheumatology*. 2021 2021; 36(2):176-184.
140. Defi IR, Gultom C, Chorman MJ, Jennie J. High-intensity interval training can improve hand grip strength, inspiratory muscle, and quality of life in systemic sclerosis subjects. *Reumatologia*. 2021 2021; 59(2):98-103.
141. Gokcen N, Badak SO, Sarpel T, Sertdemir Y, Erken E. The Efficacy of a Home-Based, Self-Administered Hand Exercise Program for Patients With Systemic Sclerosis: A Randomized Controlled, Evaluator-Blind, Clinical Trial. *JCR: Journal of Clinical Rheumatology*. 2021 2021; 6:06.
142. Maddali Bongli S, Passalacqua M, Landi G, Mikhaylova S, Tofani L, Del Rosso A, et al. Rehabilitation of the face and temporomandibular joint in systemic sclerosis. *Therapeutic Advances in Musculoskeletal Disease*. 2021 2021; 13.
143. Murphy SL, Barber M, Huang S, Sabbagh M, Cutter G, Khanna D. Intensive and App-Delivered Occupational Therapy to Improve Upper Extremity Function in Early Diffuse Cutaneous Systemic Sclerosis: A Pilot Two-Arm Trial. *Rheumatology*. 2021 2021; 11:11.
144. Samuelson UK, Ahlmen EM. Development and evaluation of a patient education program for persons with systemic sclerosis (scleroderma). *Arthritis Care & Research*. 2000 2000; 13(3):141-148.
145. Kwakkenbos L, Blyussen SJ, Vonk MC, van Helmond AF, van den Ende CH, van den Hoogen FH, et al. Addressing patient health care demands in systemic sclerosis: pre-post assessment of a psycho-educational group programme. *Clin Exp Rheumatol*. 2011 Mar-Apr; 29(2 Suppl 65):S60-65.
146. Poole JL, Skipper B, Mendelson C. Evaluation of a mail-delivered, print-format, self-management program for persons with systemic sclerosis. *Clinical Rheumatology*. 2013 2013; 32(9):1393-1398.
147. Poole JL, Mendelson C, Skipper B, Khanna D. Taking charge of systemic sclerosis: a pilot study to assess the effectiveness of an internet self-management program. *Arthritis care & research*. 2014 2014; 66(5):778-782.
148. Zannata E, Rodeghiero F, Pigatto E, Galozzi P, Polito P, Favaro M, et al. Long-term improvement in activities of daily living in women with systemic sclerosis attending occupational therapy. *British Journal of Occupational Therapy*. 2017 2017; 80(7):417-422.
149. Khanna D, Serrano J, Berrocal VJ, Silver RM, Cuencas P, Newbill SL, et al. Randomized Controlled Trial to Evaluate an Internet-Based Self-Management Program in Systemic Sclerosis. *Arthritis care & research*. 2019 2019; 71(3):435-447.
150. Thombs BD, Dyas L, Pepin M, Aguila K, Carrier ME, Tao L, et al. Scleroderma Patient-centered Intervention Network-Scleroderma Support group Leader Education (SPIN-SSLED) program: non-randomised feasibility trial. *BMJ Open*. 2019 2019; 9(11):e029935.
151. Uras C, Mastroeni S, Tabolli S, Masini C, Pallotta S, Teofoli P, et al. A comparison between two educational methods in the rehabilitation of the microstomia in systemic sclerosis: a randomized controlled trial. *Clinical Rehabilitation*. 2019 2019; 33(11):1747-1756.
152. Thombs BD, Kwakkenbos L, Levis B, Bourgeault A, Henry RS, Levis AW, et al. Effects of a multi-faceted education and support programme on anxiety symptoms among people with systemic sclerosis and anxiety during COVID-19 (SPIN-CHAT): a two-arm parallel, partially nested, randomised, controlled trial. *Lancet Rheumatol*. 2021 Jun; 3(6):e427-e437.
153. Zhou J, Yang D, Zhou SH, Wang JP, Liu YS, Wang SL. Clinical Efficacy and Safety of Bathing with Chinese Medicine Taohong Siwu Decoction ( ) for Treatment of Diffuse Cutaneous Systemic Sclerosis: A Randomized Placebo-Controlled Trial. *Chinese Journal of Integrative Medicine*. 2018 2018; 24(3):185-192.
154. Lange U, Bogensperger S, Tarner IH, Müller-Ladner U. The effects of a single carbon dioxide and hot water hand bath on acral perfusion in systemic sclerosis: A randomized, clinical study. *Journal of Scleroderma and Related Disorders*. 2019 2019; 4(2):160-162.
155. Nowicka D. Positive effect of ozonotherapy on serum concentration of soluble interleukin-2 receptor and neopterin in patients with systemic sclerosis. *Postepy Dermatol Alergol*. 2019 Apr; 36(2):158-163.
156. Sallam H, McNearney TA, Doshi D, Chen JD. Transcutaneous electrical nerve stimulation (TENS) improves upper GI symptoms and balances the sympathovagal activity in scleroderma patients. *Dig Dis Sci*. 2007 May; 52(5):1329-1337.
157. Sporbeck B, Mathiske-Schmidt K, Jahr S, Huscher D, Becker M, Riemekasten G, et al. Effect of biofeedback and deep oscillation on Raynaud's phenomenon secondary to systemic sclerosis: results of a controlled prospective randomized clinical trial. *Rheumatology International*. 2012 2012; 32(5):1469-1473.

158. McNearney TA, Sallam HS, Hunnicutt SE, Doshi D, Chen JD. Prolonged treatment with transcutaneous electrical nerve stimulation (TENS) modulates neuro-gastric motility and plasma levels of vasoactive intestinal peptide (VIP), motilin and interleukin-6 (IL-6) in systemic sclerosis. *Clin Exp Rheumatol*. 2013 Mar-Apr; 31(2 Suppl 76):140-150.
159. Collins J, Mazor Y, Jones M, Kellow J, Malcolm A. Efficacy of anorectal biofeedback in scleroderma patients with fecal incontinence: a case-control study. *Scandinavian Journal of Gastroenterology*. 2016 2016; 51(12):1433-1438.
160. Dewi S, Isbagio H, Purwaningsih EH, Kertia N, Setiabyud R, Setiati S. A Double-blind, Randomized Controlled Trial of Ciplukan (*Physalis angulata* Linn) Extract on Skin Fibrosis, Inflammatory, Immunology, and Fibrosis Biomarkers in Scleroderma Patients. *Acta Medica Indonesiana*. 2019 2019; 51(4):303-310.
161. Giuggioli D, Lumetti F, Spinella A, Cocchiara E, Sighinolfi G, Citriniti G, et al. Use of Neem oil and Hypericum perforatum for treatment of calcinosis-related skin ulcers in systemic sclerosis. *Journal of International Medical Research*. 2020 2020; 48(4):300060519882176.
162. Bongi SM, Del Rosso A, Passalacqua M, Miccio S, Cerinic MM. Manual lymph drainage improving upper extremity edema and hand function in patients with systemic sclerosis in edematous phase. *Arthritis care & research*. 2011 2011; 63(8):1134-1141.
163. Vannajak K, Boonprakob Y, Eungpinichpong W, Ungpansattawong S, Nanagara R. The short-term effect of gloving in combination with Traditional Thai Massage, heat, and stretching exercise to improve hand mobility in scleroderma patients. *Journal of Ayurveda and Integrative Medicine*. 2014 2014; 5(1):50-55.
164. O'Connor S, Durand MJ, Hudson M, Baron M, Gaudreault N. Effects of osteopathic manipulative treatment on hand function, disease symptoms and functional status in systemic sclerosis: a series of single-case studies in working women. *International Journal of Osteopathic Medicine*. 2016 2016; 22:21-32.
165. Frech TM, Khanna D, Maranian P, Frech EJ, Sawitzke AD, Murtaugh MA. Probiotics for the treatment of systemic sclerosis-associated gastrointestinal bloating/ distention. *Clin Exp Rheumatol*. 2011 Mar-Apr; 29(2 Suppl 65):S22-25.
166. Ortiz-Santamaria V, Puig C, Soldevilla C, Barata A, Cuquet J, Recasens A. Nutritional support in patients with systemic sclerosis. *Reumatologia Clinica*. 2014 2014; 10(5):283-287.
167. Doerfler B, Allen TS, Southwood C, Brenner D, Hirano I, Sheehan P. Medical Nutrition Therapy for Patients With Advanced Systemic Sclerosis (MNT PASS): A Pilot Intervention Study. *Jpen: Journal of Parenteral & Enteral Nutrition*. 2017 2017; 41(4):678-684.
168. Low AHL, Teng GG, Pettersson S, de Sessions PF, Ho EXP, Fan Q, et al. A double-blind randomized placebo-controlled trial of probiotics in systemic sclerosis associated gastrointestinal disease. *Seminars in Arthritis & Rheumatism*. 2019 2019; 49(3):411-419.
169. Marighela TF, Arismendi MI, Marvulle V, Brunialti MKC, Salomao R, Kayser C. Effect of probiotics on gastrointestinal symptoms and immune parameters in systemic sclerosis: a randomized placebo-controlled trial. *Rheumatology*. 2019 2019; 58(11):1985-1990.
170. Fretheim H, Chung BK, Didriksen H, Baekkevold ES, Midtvedt O, Brunborg C, et al. Fecal microbiota transplantation in systemic sclerosis: A double-blind, placebo-controlled randomized pilot trial. *PLoS ONE [Electronic Resource]*. 2020 2020; 15(5):e0232739.
171. Foerster J, Fleischanderl S, Wittstock S, Storch A, Meffert H, Riemekasten G, et al. Infrared-mediated hyperthermia is effective in the treatment of scleroderma-associated Raynaud's phenomenon. *Journal of Investigative Dermatology*. 2005 2005; 125(6):1313-1316.
172. Murray AK, Moore TL, Richards H, Ennis H, Griffiths CE, Herrick AL. Pilot study of intense pulsed light for the treatment of systemic sclerosis-related telangiectases. *British Journal of Dermatology*. 2012 2012; 167(3):563-569.
173. Dinsdale G, Murray A, Moore T, Ferguson J, Wilkinson J, Richards H, et al. A comparison of intense pulsed light and laser treatment of telangiectases in patients with systemic sclerosis: a within-subject randomized trial. *Rheumatology*. 2014 2014; 53(8):1422-1430.
174. Burillo-Martinez S, Prieto-Barrios M, Velasco-Tamariz V, Tous-Romero F, Lopez-Gomez S, Maronas-Jimenez L. Case series of pulsed dye laser treatment of telangiectasia in 23 patients with systemic sclerosis. *International Journal of Dermatology*. 2017 2017; 56(8):e165-e167.
175. Rosholm Comstedt L, Svensson A, Hesselstrand R, Lehti L, Troilius Rubin A. Effects of intense pulsed light in microstomia in patients with systemic sclerosis: A pilot study. *Journal of Cosmetic & Laser Therapy*. 2017 2017; 19(3):143-148.
176. Hughes M, Moore T, Manning J, Wilkinson J, Watson S, Samraj P, et al. A feasibility study of a novel low-level light therapy for digital ulcers in systemic sclerosis. *Journal of Dermatological Treatment*. 2019 2019; 30(3):251-257.
177. Tinazzi E, Amelio E, Marangoni E, Guerra C, Puccetti A, Codella OM, et al. Effects of shock wave therapy in the skin of patients with progressive systemic sclerosis: a pilot study. *Rheumatology International*. 2011 2011; 31(5):651-656.
178. Belloli L, Cugno M, D'Agostino MC, Ughi N, Tedeschi A, Respizzi S, et al. Shock wave therapy for systemic sclerosis. *Rheumatol Int*. 2013 Apr; 33(4):1099-1100.
179. Saito S, Ishii T, Ito K, Shimokawa H. Extracorporeal shock wave therapy for digital ulcers associated with systemic sclerosis. *Journal of Scleroderma and Related Disorders*. 2016 2016; 1(2):181-185.
180. Saito S, Ishii T, Kamogawa Y, Watanabe R, Shirai T, Fujita Y, et al. Extracorporeal Shock Wave Therapy for Digital Ulcers of Systemic Sclerosis: A Phase 2 Pilot Study. *Tohoku Journal of Experimental Medicine*. 2016 2016; 238(1):39-47.
181. Poole J, Conte C, Brewer C, Good CC, Perella D, Rossie KM, et al. Oral hygiene in scleroderma: The effectiveness of a multi-disciplinary intervention program. *Disability & Rehabilitation*. 2010 2010; 32(5):379-384.
182. Schouffoer AA, Ninaber MK, Beart-van de Voorde LJ, van der Giesen FJ, de Jong Z, Stolk J, et al. Randomized comparison of a multidisciplinary team care program with usual care in patients with systemic sclerosis. *Arthritis care & research*. 2011 2011; 63(6):909-917.
183. Mirasoglu B, Bagli BS, Aktas S. Hyperbaric oxygen therapy for chronic ulcers in systemic sclerosis - case series. *International Journal of Dermatology*. 2017 2017; 56(6):636-640.
184. Hassanien M, Rashad S, Mohamed N, Elawamy A, Ghaly MS. Non-invasive Oxygen-Ozone therapy in treating digital ulcers of patients with systemic sclerosis. *Acta Reumatologica Portuguesa*. 2018 2018; 43(3):210-216.
185. Yuen HK, Westwater C, Degarmo J, Bandyopadhyay D. Immediate Effect of Xylitol Chewing Gum and Mouth Rinse on Salivary Levels of Mutans Streptococci in Adults with Systemic Sclerosis: A Pilot Study. *Journal of Experimental & Integrative Medicine*. 2012 2012; 2(1):89-92.
186. Onesti MG, Fioramonti P, Carella S, Fino P, Marchese C, Scuderi N. Improvement of Mouth Functional Disability in Systemic Sclerosis Patients over One Year in a Trial of Fat Transplantation versus Adipose-Derived Stromal Cells. *Stem Cells Int*. 2016; 2016:2416192.
187. Parisi S, Celletti C, Scarati M, Priora M, Laganà A, Peroni CL, et al. Neuromuscular taping enhances hand function in patients with systemic sclerosis: a pilot study. *Clin Ter*. 2017 Nov-Dec; 168(6):e371-e375.
188. Fiori G, Marzi T, Bartoli F, Bruni C, Ciceroni C, Palomba M, et al. The challenge of pet therapy in systemic sclerosis: evidence for an impact on pain, anxiety, neuroticism and social interaction. *Clin Exp Rheumatol*. 2018 Jul-Aug; 36 Suppl 113(4):135-141.
189. Frech TM, McNeill C, Lebiez-Odrobina D, Lewis G. Amniotic membrane dressings: an effective therapy for SSc-related wounds. *Rheumatology (Oxford)*; 2019:734-736.
190. (Editor) AE, (Editor) MZ. *JBI Manual for Evidence Synthesis*. *JBI Manual for Evidence Synthesis* 2020 [cited 2022 February 25]; Available from: <https://synthesismanual.jbi.global>

## Supplemental Table S2

RESEARCH QUESTION 2: WHICH NON-PHARMACOLOGICAL INTERVENTIONS HAVE BEEN USED?

RESEARCH QUESTION 3: WHICH NON-PHARMACOLOGICAL INTERVENTIONS HAVE BEEN SHOWN TO BE EFFICACIOUS?

| Intervention/management strategy                                                                                                                                                                                                                            | Comparator         | N                             | Results                                                                                                                                                                                                                                                                                                                                                                                                                                                                                                                                                                                                                                                                                                                                                                                                                                | Efficacy                                                                                                                                                            | SD&OA* | Reference                |
|-------------------------------------------------------------------------------------------------------------------------------------------------------------------------------------------------------------------------------------------------------------|--------------------|-------------------------------|----------------------------------------------------------------------------------------------------------------------------------------------------------------------------------------------------------------------------------------------------------------------------------------------------------------------------------------------------------------------------------------------------------------------------------------------------------------------------------------------------------------------------------------------------------------------------------------------------------------------------------------------------------------------------------------------------------------------------------------------------------------------------------------------------------------------------------------|---------------------------------------------------------------------------------------------------------------------------------------------------------------------|--------|--------------------------|
| <b>SLE</b>                                                                                                                                                                                                                                                  |                    |                               |                                                                                                                                                                                                                                                                                                                                                                                                                                                                                                                                                                                                                                                                                                                                                                                                                                        |                                                                                                                                                                     |        |                          |
| <b>Physical exercise and physical activity</b>                                                                                                                                                                                                              |                    |                               |                                                                                                                                                                                                                                                                                                                                                                                                                                                                                                                                                                                                                                                                                                                                                                                                                                        |                                                                                                                                                                     |        |                          |
| <p>P: Phase I: supervised aerobic exercise at 70-80% of maximum heart rate.</p> <p>Phase II: continue exercise in the supervised setting for 1 month/ unsupervised home exercise programme for 6 months.</p> <p>C: Range of motion/muscle strengthening</p> | Other SLE patients | Intervention: 5<br>Control: 5 | <p>Cardiovascular fitness<br/>Exercise (METS)<br/>Aerobic: 0.64 (-0.11, 1.39)<br/>ROM/MS: 1.25 (0.75, 1.75)<br/>p&gt;0.05</p> <p>Mineral density<br/>BMD %T-score (lumbar)<br/>change from baseline<br/>Aerobic: -0.20 (-2.26, 1.86)<br/>ROM/MS: -5.00 (-15.00, 5.00)<br/>p&gt;0.05</p> <p>Disease activity<br/>SLAM change from baseline<br/>Aerobic: 2.80 (0.90, 4.70)<br/>ROM/MS: 0.40 (-2.27, 3.07)<br/>p&gt;0.05</p> <p>Fatigue<br/>FSS change from baseline<br/>Aerobic: -0.71 (-1.23, -0.18)<br/>ROM/MS: -0.68 (-1.22, -0.13)<br/>p&gt;0.05</p> <p>Isometric strength<br/>Both groups showed a significant increase in hamstring but not quadriceps strength. No differences between groups.</p> <p>HRQoL<br/>SF-36 PCS change from baseline<br/>Aerobic: 7.00 (-4.80, 18.80)<br/>ROM/MS: 2.5 (-23.11, 28.11)<br/>p&gt;0.05</p> | <p>Cardiovascular fitness: Yes/No</p> <p>Mineral density: No</p> <p>Disease activity: No</p> <p>Fatigue: Yes/No</p> <p>Isometric strength: Yes</p> <p>HRQoL: No</p> | 11; W  | Ramsey-Goldman, 2000 [1] |



| Intervention/management strategy                                                                                                                                                                                             | Comparator         | N                               | Results                                                                                                                                                                                                                                                                                                                                                                                                                                                                                                                                                                       | Efficacy                                                                                                                            | SD&OA* | Reference       |
|------------------------------------------------------------------------------------------------------------------------------------------------------------------------------------------------------------------------------|--------------------|---------------------------------|-------------------------------------------------------------------------------------------------------------------------------------------------------------------------------------------------------------------------------------------------------------------------------------------------------------------------------------------------------------------------------------------------------------------------------------------------------------------------------------------------------------------------------------------------------------------------------|-------------------------------------------------------------------------------------------------------------------------------------|--------|-----------------|
| <p>P: Exercise group= exercise (walking, cycling, and swimming)</p> <p>Relaxation group= listen to a relaxation audiotape in a darkened, warm, and quiet room</p> <p>C: Relaxation group: listen to relaxation audiotape</p> | Other SLE patients | Intervention: 62<br>Control: 32 | <p>Anxiety<br/>Exercise: 7.4 (0.8)<br/>4.6 (0.7)<br/>Control: 8.2 (0.8)<br/>5.7 (0.6)<br/>p=0.62</p> <p>Disease Activity (SLAM)<br/>Exercise: 4 (3–8)<br/>Control: 6 (4–7). p=0.20</p> <p>Fatigue<br/>Exercise: 15 (1.5)<br/>239 (15)<br/>Control: 21 (1.6)<br/>283 (14)<br/>p=0.05</p> <p>HRQoL<br/>No significant differences in SF-36 PF, RP, VT.</p> <p>Quality of sleep<br/>Exercise: 6 (3–9)<br/>Control: 8 (5–11). p=0.50</p> <p>Aerobic capacity<br/>No significant differences in test duration, max O<sub>2</sub> uptake, max ventilation, max HR, recovery HR.</p> | <p>Anxiety: No<br/>Disease Activity (SLAM): No<br/>Fatigue: Yes<br/>HRQoL: No<br/>Quality of sleep: No<br/>Aerobic capacity: No</p> | 11; I  | Tench, 2003 [2] |

| Intervention/management strategy                                                                                                | Comparator                      | N                               | Results                                                                                                                                                                                                                                                                                                                                                                                                                                                                                                                                                                                                                                                                                                                                                                                                                                                                                                                                                                                                                                                      | Efficacy                                                                                                                        | SD&OA* | Reference                |
|---------------------------------------------------------------------------------------------------------------------------------|---------------------------------|---------------------------------|--------------------------------------------------------------------------------------------------------------------------------------------------------------------------------------------------------------------------------------------------------------------------------------------------------------------------------------------------------------------------------------------------------------------------------------------------------------------------------------------------------------------------------------------------------------------------------------------------------------------------------------------------------------------------------------------------------------------------------------------------------------------------------------------------------------------------------------------------------------------------------------------------------------------------------------------------------------------------------------------------------------------------------------------------------------|---------------------------------------------------------------------------------------------------------------------------------|--------|--------------------------|
| <p>P: Supervised aerobic exercise: incremental load on a treadmill</p> <p>C: Usual care</p>                                     | Other SLE patients              | Intervention: 41<br>Control: 19 | <p>Aerobic capacity</p> <p>Training: Improvement in max exercise tolerance, VO<sub>2</sub> max, anaerobic threshold, max ventilation and Borg scale from baseline.<br/>Greater improvements than control in anaerobic threshold.</p> <p>HRQoL</p> <p>Training: Improvement in all scales but SF-36 BP from baseline.<br/>Greater improvements than control in SF-36 PF and VT</p> <p>Depression</p> <p>Training: pre: 2.0 (2.7)<br/>post: 1.7 (2.7)<br/>Control: pre: 2.5 (2.7)<br/>post: 3.0 (3.5)<br/>P intragroup: 0.47<br/>intergroup: 0.10</p> <p>Pain</p> <p>Training: pre: 8.4 (12.8)<br/>post: 2.9 (3.0)<br/>Control: pre: 5.8 (6.4)<br/>post: 6.6 (8.5)<br/>P intragroup: &lt;0.001<br/>intergroup: 0.15</p> <p>Fatigue</p> <p>Training: pre: 3.6 (1.5)<br/>post: 3.3 (1.3)<br/>Control: pre: 3.3 (1.3)<br/>post: 3.3 (1.5)<br/>P intragroup: &lt;0.001<br/>intergroup: 0.10</p> <p>HAQ</p> <p>Training: pre: 0.14 (0.21)<br/>post: 0.06 (0.19)<br/>Control: pre: 0.23 (0.27)<br/>post: 0.38 (1.14)<br/>P intragroup: 0.01<br/>intergroup: 0.03</p> | <p>Aerobic capacity: Yes</p> <p>HRQoL: Yes</p> <p>Depression: No</p> <p>Pain: Yes/No</p> <p>Fatigue: Yes/No</p> <p>HAQ: Yes</p> | 10; I  | Carvalho, 2005 [3]       |
| <p>P: Supervised aerobic exercise: walking on a treadmill for a 3-month programme</p> <p>C: N/A: intraindividual assessment</p> | N/A; intraindividual assessment | Intervention: 6<br>Control: -   | <p>Disease activity</p> <p>No significant changes in SLEDAI, CRP and ESR after exercise.</p> <p>Aerobic capacity</p> <p>VO<sub>2</sub> max increased after exercise compared with baseline (p=0.05)</p> <p>HRQoL</p> <p>No significant changes in SF-36 pain score (p=0.1) and MHAQ score (p=0.08).</p> <p>Fatigue</p> <p>SF-36 VT score improved after exercise compared with baseline (p=0.03)</p>                                                                                                                                                                                                                                                                                                                                                                                                                                                                                                                                                                                                                                                         | <p>Disease activity: No</p> <p>Aerobic capacity: Yes</p> <p>HRQoL: No</p> <p>Fatigue: Yes</p>                                   | 10; R  | Clarke-Jenssen, 2005 [4] |

| Intervention/management strategy                                                                                                      | Comparator                      | N                               | Results                                                                                                                                                                                                                                                                                                                                                                                                                                                                                                                                                                                                                                                                       | Efficacy                                                                                      | SD&OA* | Reference          |
|---------------------------------------------------------------------------------------------------------------------------------------|---------------------------------|---------------------------------|-------------------------------------------------------------------------------------------------------------------------------------------------------------------------------------------------------------------------------------------------------------------------------------------------------------------------------------------------------------------------------------------------------------------------------------------------------------------------------------------------------------------------------------------------------------------------------------------------------------------------------------------------------------------------------|-----------------------------------------------------------------------------------------------|--------|--------------------|
| P: Cardiorespiratory exercise test carried out on a treadmill<br>C: No                                                                | Healthy controls                | Intervention: 20<br>Control: 20 | Ventilatory efficiency<br>BF, BF/VT, VE/VCO2: significantly higher in SLE patients vs controls (p<0.05).<br>VT, TE, TI, TOT, PETCO2: significantly lower in SLE patients vs controls (p<0.05).                                                                                                                                                                                                                                                                                                                                                                                                                                                                                | Ventilatory efficiency: N/A                                                                   | 1; R   | do Prado, 2011 [5] |
| P: Program of increasing exercise from 100 to 300 min/week (combined with reduced-calorie diet)<br>C: N/A: intraindividual assessment | N/A; intraindividual assessment | Intervention: 15<br>Control: -  | Body composition<br>Weight (kg): - 8.2 (2.0) kg from baseline<br>p<0.05<br>Waist circumference (cm) = - 10.8 (4.9) cm from baseline<br>p<0.05<br><br>Physical activity<br>Physical activity (min/session): +25.6 min/session from baseline<br>p<0.05                                                                                                                                                                                                                                                                                                                                                                                                                          | Body composition: Yes<br>Physical activity: Yes                                               | 10; W  | Otto, 2011 [6]     |
| P: Home exercise program using Wii Fit interactive video game for 10 weeks<br>C: N/A: intraindividual assessment                      | N/A; intraindividual assessment | Intervention: 15<br>Control: -  | Body composition<br>Weight (kg): baseline: 75.4 (17.4)<br>after Wii: 73.6 (16.9) p=0.01<br>Waist circumference (cm): baseline: 90.8 (16.4)<br>after Wii: 88.0 (15.2) p=0.01<br><br>Anxiety/Depression<br>HADS anxiety: baseline: 8.5 (3.4)<br>after Wii: 7.0 (3.0) p=0.03<br>HADS depression: baseline: 5.9 (3.9)<br>after Wii: 4.6 (2.8) p=0.08<br><br>Fatigue<br>FSS: baseline: 53.9 (7.2)<br>after Wii: 44.0 (11.2) p=0.002<br><br>Pain<br>SF-MPQ total index: baseline: 7.1 (9.5)<br>after Wii: 3.8 (7.7) p=0.06<br>SF-MPQ overall intensity: baseline: 1.0 (1.1)<br>after Wii: 0.4 (0.7) p=0.04<br><br>Sleep<br>PSQI: baseline: 9.2 (3.6)<br>after Wii: 4.6 (2.8) p=0.07 | Body composition: Yes<br>Anxiety/Depression: Yes/No<br>Fatigue: Yes<br>Pain: Yes<br>Sleep: No | 10; R  | Yuen, 2011 [7]     |

| Intervention/management strategy                                                                                                                                           | Comparator         | N                               | Results                                                                                                                                                                                                                                                                                                                                                                                                                                                                                                                                                                                                                                                                                                                           | Efficacy                                                                               | SD&OA* | Reference                |
|----------------------------------------------------------------------------------------------------------------------------------------------------------------------------|--------------------|---------------------------------|-----------------------------------------------------------------------------------------------------------------------------------------------------------------------------------------------------------------------------------------------------------------------------------------------------------------------------------------------------------------------------------------------------------------------------------------------------------------------------------------------------------------------------------------------------------------------------------------------------------------------------------------------------------------------------------------------------------------------------------|----------------------------------------------------------------------------------------|--------|--------------------------|
| <p>P: Supervised training sessions: 35–40 minutes of resistance, 30 minutes of treadmill aerobic training, and 5 minutes of stretching exercises.</p> <p>C: Usual care</p> | Other SLE patients | Intervention: 14<br>Control: 10 | <p>Chronotropic reserve</p> <p>Chronotropic reserve: SLE trained: baseline: 81.3 (15.0) post: 95.4 (9.2). SLE non-trained: baseline: 76.1 (18.1) post: 75.6 (16.6) P intragroup&lt;0.05 P intergroup&lt;0.05.</p> <p>Heart rate recovery: SLE trained: baseline: 24.1 (9.8) post: 40.9 (10.3). SLE non-trained: baseline: 25.4 (12.8) post: 26.7 (9.3) P intragroup&lt;0.05 P intergroup&lt;0.05.</p>                                                                                                                                                                                                                                                                                                                             | Chronotropic reserve: Yes                                                              | 11; W  | Miossi, 2012 [8]         |
| <p>P: Ergospirometric test</p> <p>C: No</p>                                                                                                                                | Healthy controls   | Intervention: 27<br>Control: 30 | Inflammatory markers<br>No differences in IL-6, IL-10 and TNF- $\alpha$ after exercise compared to baseline.                                                                                                                                                                                                                                                                                                                                                                                                                                                                                                                                                                                                                      | Inflammatory markers: No                                                               | 10; I  | da Silva, 2013 [9]       |
| <p>P: Supervised walking at a heart rate corresponding to the VT1 threshold.</p> <p>C: Usual care</p>                                                                      | Other SLE patients | Intervention: 18<br>Control: 20 | <p>Disease activity (SLEDAI)<br/>Exercise: baseline: 2.0 (2.1) post: 2.4 (2.3)<br/>Control: baseline: 2.4 (2.3) post: 3.1 (5.3)<br/>P intragroup=0.196<br/>P intergroup: 0.652</p> <p>Vascular function<br/>Flow mediated dilation (%)<br/>Exercise: baseline: 6.3 (6.7) post: 14.1 (9.1) p=0.006<br/>Control: baseline: 8.4 (8.2) post: 9.4 (5.7) p=0.598</p> <p>Nitro-glycerine-mediated dilation<br/>Exercise: baseline: 20.9 (6.1) post: 24.3 (7.9) p=0.147<br/>Control: baseline: 26.7 (7.1) post: 26.1 (7.0) p=0.782</p> <p>Aerobic capacity<br/>Improvement in exercise group, but not in controls, in exercise tolerance (min), maximum speed (km/h) and speed VT1, but not in resting HR, VO2 max, HRmax and VE max.</p> | Disease activity (SLEDAI): No<br>Vascular function: Yes/No<br>Aerobic capacity: Yes/No | 10; R  | dos Reis-Neto, 2013 [10] |

| Intervention/management strategy                                                   | Comparator                           | N                               | Results                                                                                                                                                                                                                                                                                                                                                                                                                                                                                                                                                                                                                                                                                                                                                                                                                                                                                                                     | Efficacy                                                                                          | SD&OA* | Reference         |
|------------------------------------------------------------------------------------|--------------------------------------|---------------------------------|-----------------------------------------------------------------------------------------------------------------------------------------------------------------------------------------------------------------------------------------------------------------------------------------------------------------------------------------------------------------------------------------------------------------------------------------------------------------------------------------------------------------------------------------------------------------------------------------------------------------------------------------------------------------------------------------------------------------------------------------------------------------------------------------------------------------------------------------------------------------------------------------------------------------------------|---------------------------------------------------------------------------------------------------|--------|-------------------|
| <p>P: Walking, running, cycling, or use of an elliptical machine.</p> <p>C: No</p> | Other SLE patients, healthy controls | Intervention: 14<br>Control: 12 | <p>Disease activity</p> <p>SLAQ global score:<br/>Sedentary: 1.5 (0.3)<br/>Physically active: 0.9 (0.3)<br/>p&gt;0.05</p> <p>SLAQ numerical rating:<br/>Sedentary: 5.6 (0.8)<br/>Physically active: 3.2 (0.6)<br/>p&lt;0.05</p> <p>SLAQ symptom score:<br/>Sedentary: 4.1 (1.3)<br/>Physically active: 0.8 (0.4)<br/>p&lt;0.05</p> <p>Inflammatory markers</p> <p>CRP:<br/>Sedentary: 4.4 (0.9)<br/>Physically active: 1.4 (0.4)<br/>p&lt;0.05</p> <p>sICAM-1:<br/>Sedentary: 185.8 (24.9)<br/>Physically active: 131.2 (9.9)<br/>p&lt;0.05</p> <p>No differences between groups in IL-6, IL-10, IL-12 and TNF-<math>\alpha</math></p> <p>Vascular function</p> <p>FMD:<br/>No significant differences between sedentary and physically active SLE patients. However, sedentary SLE patients had lower FMD than healthy controls [3.6 (1.3) vs. 8.1 (1.2) p&lt;0.05], but not the physically active SLE group (p=0.73).</p> | <p>Disease activity: Yes</p> <p>Inflammatory markers: Yes/No</p> <p>Vascular function: Yes/No</p> | 1; I   | Barnes, 2014 [11] |

| Intervention/management strategy                                                                                                 | Comparator                           | N                               | Results                                                                                                                                                                                                                                                                                                                                                                                                                                                                                                                                                                                                                                                                                                                                                                                                                                                                                                                                       | Efficacy                                                                                                                                                      | SD&OA* | Reference            |
|----------------------------------------------------------------------------------------------------------------------------------|--------------------------------------|---------------------------------|-----------------------------------------------------------------------------------------------------------------------------------------------------------------------------------------------------------------------------------------------------------------------------------------------------------------------------------------------------------------------------------------------------------------------------------------------------------------------------------------------------------------------------------------------------------------------------------------------------------------------------------------------------------------------------------------------------------------------------------------------------------------------------------------------------------------------------------------------------------------------------------------------------------------------------------------------|---------------------------------------------------------------------------------------------------------------------------------------------------------------|--------|----------------------|
| <p>P: Treadmill walking</p> <p>C: No</p>                                                                                         | Healthy controls                     | Intervention: 8<br>Control: 10  | <p>Aerobic capacity<br/>Improvement in time in ventilatory anaerobic threshold, respiratory compensation point, time to exhaustion and HR peak, but not VO<sub>2</sub> peak after exercise programme, compared with baseline.</p> <p>Body composition<br/>BMI: baseline: 25.2 (2.6)<br/>post: 24.8 (2.1). p&gt;0.05</p> <p>Disease activity<br/>SLEDAI: baseline: 1.3 (1.1)<br/>post: 0.9 (1.0). p&gt;0.05</p> <p>Fatigue<br/>FSS: baseline: 33.4 (14.4)<br/>post: 26.4 (10.2). p&lt;0.05</p> <p>Inflammatory markers<br/>Resting cytokine levels: No differences between exercise and control groups in IFN-gamma, IL-10, IL-6, TNF-a and sTNFR1/2.<br/>After a single bout of acute moderate or intense aerobic exercise: lower AUC IL-10 group for exercise vs control group. No differences for other cytokines.</p> <p>HRQoL<br/>SF-36: No significant differences in any subscale after exercise programme, compared with baseline.</p> | <p>Aerobic capacity: Yes</p> <p>Body composition: No</p> <p>Disease activity: No</p> <p>Fatigue: Yes</p> <p>Inflammatory markers: Yes/No</p> <p>HRQoL: No</p> | 10; I  | Perandini, 2014 [12] |
| <p>P: Seven strength exercises for the major muscle groups followed by aerobic exercise on a treadmill.</p> <p>C: Usual care</p> | Other SLE patients, healthy controls | Intervention: 17<br>Control: 16 | <p>Lipid profile<br/>No significant changes in plasma total/HDL/LDL/VLDL cholesterol, insulin or glucose levels after intervention.</p>                                                                                                                                                                                                                                                                                                                                                                                                                                                                                                                                                                                                                                                                                                                                                                                                       | Lipid profile: No                                                                                                                                             | 11; W  | Benatti, 2015 [13]   |

| Intervention/management strategy                                                                                  | Comparator                           | N                               | Results                                                                                                                                                                                                                                                                                                                                                                                                                                                                                                                                                                                                                                         | Efficacy                                                          | SD&OA* | Reference             |
|-------------------------------------------------------------------------------------------------------------------|--------------------------------------|---------------------------------|-------------------------------------------------------------------------------------------------------------------------------------------------------------------------------------------------------------------------------------------------------------------------------------------------------------------------------------------------------------------------------------------------------------------------------------------------------------------------------------------------------------------------------------------------------------------------------------------------------------------------------------------------|-------------------------------------------------------------------|--------|-----------------------|
| <p>P: Aerobic training on a bicycle ergometer, for 6 weeks.</p> <p>C: N/A: intraindividual assessment</p>         | N/A; intraindividual assessment      | Intervention: 30<br>Control: 30 | <p>Depression (BDI)<br/>BDI moderate or severe depression<br/>Aerobic training: baseline: 70%<br/>post: 10%<br/>p&lt;0.001<br/>Isotonic exercise: baseline: 70%<br/>post: 6.6%<br/>p&lt;0.001</p> <p>Fatigue (FSS)<br/>Aerobic training: baseline: 53.6 (6.3)<br/>post: 29.2 (7.9)<br/>p&lt;0.001<br/>Isotonic exercise: baseline: 53.6 (6.3)<br/>CG after activity: 29.2 (7.9)<br/>p&lt;0.001<br/>[the reported values are indeed the same]</p> <p>HRQoL (SF-36)<br/>BDI moderate or severe depression<br/>Aerobic training: baseline: 70%<br/>post: 10%<br/>p&lt;0.001<br/>Isotonic exercise: baseline: 70%<br/>post: 6.6%<br/>p&lt;0.001</p> | Depression (BDI): Yes<br>Fatigue (FSS): Yes<br>HRQoL (SF-36): Yes | 11; W  | Bogdanovic, 2015 [14] |
| <p>P: Two single bouts of acute aerobic exercise (moderate and intense) performed in a treadmill</p> <p>C: No</p> | Other SLE patients, healthy controls | Intervention: 23<br>Control: 10 | <p>Inflammatory markers<br/>Higher levels of TNF-a and sTNFR1-2 in patients with inactive vs active disease.</p> <p>No significant differences in IFN-gamma, IL-6 or IL-10.</p> <p>Changes were transient and reached baseline levels after 24h recovery.</p>                                                                                                                                                                                                                                                                                                                                                                                   | Inflammatory markers: N/A                                         | 10; I  | Perandini, 2015 [15]  |

| Intervention/management strategy                                                                                                                              | Comparator         | N                               | Results                                                                                                                                                                                                                                                                                                                                                                                                                                                                                                                                                                                                                                                                                                                                                                                                                                                                                                                                                                                                                                                          | Efficacy                                                                                                                           | SD&OA* | Reference           |
|---------------------------------------------------------------------------------------------------------------------------------------------------------------|--------------------|---------------------------------|------------------------------------------------------------------------------------------------------------------------------------------------------------------------------------------------------------------------------------------------------------------------------------------------------------------------------------------------------------------------------------------------------------------------------------------------------------------------------------------------------------------------------------------------------------------------------------------------------------------------------------------------------------------------------------------------------------------------------------------------------------------------------------------------------------------------------------------------------------------------------------------------------------------------------------------------------------------------------------------------------------------------------------------------------------------|------------------------------------------------------------------------------------------------------------------------------------|--------|---------------------|
| <p>P: Walking and bicycle vs free weight and elastic bands exercises 3 times/week for 12 weeks</p> <p>C: Usual care</p>                                       | Other SLE patients | Intervention: 21<br>Control: 21 | <p>Depression (BDI)<br/>Cardiovascular training: baseline: 20.6 (5.3) post: 20.1 (7.1). p&gt;0.05<br/>Resistance training: baseline: 19.4 (5.0) post: 17.3 (4.4). p&gt;0.05<br/>Control: baseline: 19.1 (5.6) post: 20.1 (5.9). p&lt;0.05</p> <p>Disease activity (SLEDAI)<br/>Cardiovascular training: baseline: 1.8 (0.6) post: 1.6 (0.9). p&gt;0.05<br/>Resistance training: baseline: 1.4 (0.6) post: 1.3 (0.5). p&gt;0.05<br/>Control: baseline: 2.3 (1.7) post: 1.2 (0.4). p&lt;0.05</p> <p>HRQoL (SF-36)<br/>Cardiovascular training: significant improvement in all SF-36 subscales. Greater improvements than control in SF-36 RP and VT.<br/>Resistance training: significant improvement in all SF-36 subscales but VT.</p> <p>Physical function (12-min walk test)<br/>Cardiovascular training: baseline: 1020 (225) post: 1406 (257). p&lt;0.05<br/>Resistance training: baseline: 911 (172) post: 1140 (173). p&lt;0.05<br/>Control: baseline: 936 (169) post: 1068 (187). p&lt;0.05<br/>CT vs control: p&lt;.0.001<br/>RT vs control: p=0.001</p> | <p>Depression (BDI): No<br/>Disease activity (SLEDAI): No<br/>HRQoL (SF-36): Yes<br/>Physical function (12-min walk test): Yes</p> | 11; I  | Abrahamo, 2016 [16] |
| <p>P: Endurance exercises (walking or bicycle) + strengthening exercises (with elastoband or weights for both upper and lower limbs)</p> <p>C: Usual care</p> | Other SLE patients | Intervention: 15<br>Control: 18 | <p>Fatigue (FSS)<br/>Supervised training: reduction in FSS score at month 3 (p=0.007) and 9 (p=0.003) compared with baseline.<br/>Home training reduction in FSS score at month 3 (p=0.003) and 9 (p=0.035) compared with baseline.<br/>Control: no significant differences in FSS score at month 3 and 9 compared with baseline.<br/>[values not reported only box plots].</p> <p>Physical capacity<br/>Physical working capacity (PWC75%/kg) and the Borg scale did not improve over time in none of the 3 groups, nor at month 3, neither at month 9.</p>                                                                                                                                                                                                                                                                                                                                                                                                                                                                                                     | <p>Fatigue (FSS): Yes<br/>Physical capacity: No</p>                                                                                | 11; W  | Avaux, 2016 [17]    |



| Intervention/management strategy                                                                                                                                                                                           | Comparator                           | N                               | Results                                                                                                                                                                                                                                                                                                                                                                                                                                                                                                                                                                                                                                                                                                                                                                                                                                                                                                                                                       | Efficacy                                                                                                    | SD&OA* | Reference            |
|----------------------------------------------------------------------------------------------------------------------------------------------------------------------------------------------------------------------------|--------------------------------------|---------------------------------|---------------------------------------------------------------------------------------------------------------------------------------------------------------------------------------------------------------------------------------------------------------------------------------------------------------------------------------------------------------------------------------------------------------------------------------------------------------------------------------------------------------------------------------------------------------------------------------------------------------------------------------------------------------------------------------------------------------------------------------------------------------------------------------------------------------------------------------------------------------------------------------------------------------------------------------------------------------|-------------------------------------------------------------------------------------------------------------|--------|----------------------|
| <p>P: 0 to 3 months: high + low-moderate intensity aerobic exercise + education+ individual coaching.</p> <p>4 to 12 months: high + low-moderate intensity aerobic exercise + individual coaching</p> <p>C: Usual care</p> | Other SLE patients                   | Intervention: 18<br>Control: 17 | <p>Aerobic capacity<br/>Exercise group: significant improvement in VO2 max, 60% max and 80% max at month 12 compared with baseline.<br/>No significant differences between exercise and control groups.</p> <p>Disease activity<br/>Exercise: baseline 1 (0–8) month 12 4 (2–6)<br/>Control: baseline 2 (0–3) month 12 2 (0–5)<br/>P: intragroup=0.25 intergroup: 0.14.</p> <p>HRQoL<br/>No significant improvement in SF-36 subscales in the exercise and control groups at month 12 compared with baseline.<br/>Exercise group showed a greater improvement in SF-36 MH than control (group x time p value= 0.05)</p> <p>Organ Damage<br/>No significant increase in SDI score in exercise and control groups. No significant differences between groups at month 12.</p> <p>Physical activity<br/>The frequency of self-reported physical activity at high intensity increased for the exercise and control groups at month 12 compared with baseline.</p> | Aerobic capacity: Yes/No<br>Disease activity: No<br>HRQoL: No<br>Organ Damage: No<br>Physical activity: Yes | 11; I  | Bostrom, 2016 [18]   |
| <p>P: Single bout of acute aerobic exercise performed 72 hours after a cardiopulmonary exercise test to determine VAT and RCP</p> <p>C: No</p>                                                                             | Other SLE patients, healthy controls | Intervention: 8<br>Control: 4   | <p>Inflammatory markers<br/>SLEinactive and HC group=down-regulation of innate immunity genes (IL13-IL2-IL18-CCL5) and TLR-related pathway genes at End-ex (up-regulated at baseline) + up-regulation of JAK/STAT in recovery<br/>SLEactive= fewer genes down-regulated related to both innate and adaptive immunity (IL2, IFNG,IL18,IL13,GATA3,CCL4) + fewer genes up-regulated in recovery ,resulting in a less connected network.</p>                                                                                                                                                                                                                                                                                                                                                                                                                                                                                                                      | Inflammatory markers: Yes                                                                                   | 10; I  | Perandini, 2016 [19] |

| Intervention/management strategy                                                                                            | Comparator | N                                      | Results                                                                                                                                                                                                                                                                                                                                                                                                                                                                                                                                                                                                    | Efficacy                                                                                   | SD&OA* | Reference          |
|-----------------------------------------------------------------------------------------------------------------------------|------------|----------------------------------------|------------------------------------------------------------------------------------------------------------------------------------------------------------------------------------------------------------------------------------------------------------------------------------------------------------------------------------------------------------------------------------------------------------------------------------------------------------------------------------------------------------------------------------------------------------------------------------------------------------|--------------------------------------------------------------------------------------------|--------|--------------------|
| <p>P: Various modalities: aerobic exercise programme, resistance training, multi-component interventions.</p> <p>C: N/A</p> | N/A        | 6 RCTs and 5 quasi-RCTs                | <p>Aerobic capacity<br/>Exercise groups: significant increase compared with control group (mean difference: = 1.85, 95%CI: (1.12, 2.58), p&lt;0.001)</p> <p>Depression<br/>Exercise groups: significant decrease compared with control group (mean difference: = -0.40, 95%CI (-0.71, -0.09), p=0.01)</p> <p>Disease activity<br/>Exercise groups: no significant changes compared with control (mean difference: = 0.01, 95%CI: (-0.54, 0.56), p=0.97)</p> <p>Fatigue<br/>Exercise groups: significant decrease compared with control group (mean difference: = -0.61, 95%CI: (-1.19, -0.02), p=0.04)</p> | <p>Aerobic capacity: Yes<br/>Depression: Yes<br/>Disease activity: No<br/>Fatigue: Yes</p> | 12; R  | O'Dwyer, 2017 [20] |
| <p>P: Aerobic exercise (treadmill, walking/cycling/swimming)</p> <p>C: N/A</p>                                              | N/A        | 3 studies: 2 RCT, 1 quasi-experimental | <p>Fatigue<br/>Exercise groups: significant decrease compared with control group (mean difference: = -0.52, 95%CI: (-0.91, -0.13), p=0.009)</p>                                                                                                                                                                                                                                                                                                                                                                                                                                                            | Fatigue: Yes                                                                               | 12; R  | Wu, 2017 [21]      |

| Intervention/management strategy                                                                                                                                                                           | Comparator                      | N                              | Results                                                                                                                                                                                                                                                                                                                                                                                                                                                                                                                                                                                                                                                                                                                                                                                                                                                                                                                                                                            | Efficacy                                                                                                        | SD&OA* | Reference            |
|------------------------------------------------------------------------------------------------------------------------------------------------------------------------------------------------------------|---------------------------------|--------------------------------|------------------------------------------------------------------------------------------------------------------------------------------------------------------------------------------------------------------------------------------------------------------------------------------------------------------------------------------------------------------------------------------------------------------------------------------------------------------------------------------------------------------------------------------------------------------------------------------------------------------------------------------------------------------------------------------------------------------------------------------------------------------------------------------------------------------------------------------------------------------------------------------------------------------------------------------------------------------------------------|-----------------------------------------------------------------------------------------------------------------|--------|----------------------|
| <p>P: Supervised treadmill aerobic training</p> <p>C: No</p>                                                                                                                                               | Other SLE patients              | Intervention: 9<br>Control: 10 | <p>Aerobic capacity</p> <p>Exercise group: significant increases in VAT, time at RCP, time to exhaustion and HR peak, but not VO2 peak compared with control.</p> <p>Body composition</p> <p>Body weight (kg):<br/>Exercise: baseline 65.0 (10.5)<br/>post: -0.3 (-1.7-1.1)<br/>p=0.6<br/>Control: baseline 67.6 (8.8)<br/>post: 0.2 (-1.2-1.5).</p> <p>Fat mass (kg):<br/>Exercise: baseline 21.7 (6.5)<br/>post: 0.1 (-0.9-1.1)<br/>p=0.7<br/>Control: baseline 22.8 (4.8)<br/>post: -0.2 (-1.3-0.9).</p> <p>Food Intake</p> <p>No significant differences in change of caloric or macronutrients intake between exercise and control groups.</p> <p>Insulin sensitivity</p> <p>Exercise group: greater decreases in fasting insulin, AUC insulin, HOMA IR and fasting free fatty acids, and greater increases in Matsuda index and fasting glucagon, compared with control.<br/>No differences in fasting glucose, AUC glucose, fasting proinsulin and insulinogenic index.</p> | <p>Aerobic capacity: Yes</p> <p>Body composition: No</p> <p>Food Intake: No</p> <p>Insulin sensitivity: Yes</p> | 11; W  | Benatti, 2018 [22]   |
| <p>P: Hatha yoga classes (deep breathing, relaxation, meditation, poses for strength, flexibility, and balance) + encouragement to home practice for 8 weeks</p> <p>C: N/A: intraindividual assessment</p> | N/A; intraindividual assessment | Intervention: 7<br>Control: -  | <p>Relaxation</p> <p>Exit interviews (mentions)= benefits: 10<br/>feeling of general well-being: 2<br/>enjoyment: 3<br/>Personal journals (mentions)= benefits: 21<br/>expectation of future benefits: 7<br/>feeling of general well-being: 7</p>                                                                                                                                                                                                                                                                                                                                                                                                                                                                                                                                                                                                                                                                                                                                  | Relaxation: Yes                                                                                                 | 9; W   | Middleton, 2018 [23] |

| Intervention/management strategy                                                       | Comparator         | N                               | Results                                                                                                                                                                                                                                                                                                                                                                                                                                                                                                                                                                                                                                                                                                                                                                                                                                                                                                                                                                                                        | Efficacy                                                                                                         | SD&OA* | Reference                    |
|----------------------------------------------------------------------------------------|--------------------|---------------------------------|----------------------------------------------------------------------------------------------------------------------------------------------------------------------------------------------------------------------------------------------------------------------------------------------------------------------------------------------------------------------------------------------------------------------------------------------------------------------------------------------------------------------------------------------------------------------------------------------------------------------------------------------------------------------------------------------------------------------------------------------------------------------------------------------------------------------------------------------------------------------------------------------------------------------------------------------------------------------------------------------------------------|------------------------------------------------------------------------------------------------------------------|--------|------------------------------|
| <p>P: Aerobic exercise on a treadmill</p> <p>C: Guidelines about healthy lifestyle</p> | Other SLE patients | Intervention: 26<br>Control: 32 | <p>Inflammatory markers</p> <p>Exercise group: No significant differences in change from baseline in hsCRP, TNF-<math>\alpha</math>, IL-6, MPO compared with control.</p> <p>Physical fitness</p> <p>Increase in Bruce (min)</p> <p>Exercise: 2.49 (0.44)</p> <p>Control: 0.22 (0.41)</p> <p>p=0.001</p> <p>Vascular function</p> <p>Change in Pulse wave velocity (m/s)</p> <p>Exercise: -0.26 (0.14)</p> <p>Control: -0.22 (0.13)</p> <p>p=0.860</p>                                                                                                                                                                                                                                                                                                                                                                                                                                                                                                                                                         | <p>Inflammatory markers: No</p> <p>Physical fitness: Yes</p> <p>Vascular function: No</p>                        | 10; I  | Soriano-Maldonado, 2018 [24] |
| <p>P: Kinesiotherapy protocol for 4 months</p> <p>C: Usual care</p>                    | Other SLE patients | Intervention: 5<br>Control: 9   | <p>Body composition</p> <p>Kinesiotherapy: no significant changes from baseline in anthropometric measurements.</p> <p>Control: increase in abdominal circumference [baseline: 84.5 (81.5-102.0) post: 85.0 (82.8-102.5) p=0.039], no significant changes from baseline in other anthropometric measurements.</p> <p>HRQoL</p> <p>Kinesiotherapy: Improvement in SF-36 BP no significant changes from baseline in other subscales.</p> <p>Control: no significant changes in any SF-36 subscales.</p> <p>Inflammatory markers</p> <p>Kinesiotherapy: no significant changes from baseline in IL-2, IL-5, IL-6, IL-8, IL-10 and TNF-<math>\alpha</math>.</p> <p>Control: significant decrease in IL-5, IL-6 and IL-10.</p> <p>Strength and flexibility</p> <p>Kinesiotherapy: Improvement in Wells test (cm)</p> <p>no significant changes from baseline in bench press, leg extension, lying legs curls and stretching test.</p> <p>Control: no significant changes in any strength and flexibility tests.</p> | <p>Body composition: No</p> <p>HRQoL: No</p> <p>Inflammatory markers: No</p> <p>Strength and flexibility: No</p> | 10; R  | Timoteo, 2018 [25]           |

| Intervention/management strategy                                                                              | Comparator         | N                               | Results                                                                                                                                                                                                                                                                                                                                                                                                                                                                                                                                          | Efficacy                                                             | SD&OA* | Reference          |
|---------------------------------------------------------------------------------------------------------------|--------------------|---------------------------------|--------------------------------------------------------------------------------------------------------------------------------------------------------------------------------------------------------------------------------------------------------------------------------------------------------------------------------------------------------------------------------------------------------------------------------------------------------------------------------------------------------------------------------------------------|----------------------------------------------------------------------|--------|--------------------|
| P: Aerobic exercise<br>C: N/A                                                                                 | N/A                | 2 RCTs                          | HRQoL<br>Exercise groups: significant improvement in SF-36 physical functioning (mean difference: = -9.20, 95%CI (-18.16, -0.23), p=0.04), but not in vitality.                                                                                                                                                                                                                                                                                                                                                                                  | HRQoL: Yes/No                                                        | 12; R  | da Hora, 2019 [26] |
| P: Walk With Ease (WWE) programme<br>C: Did not complete intervention                                         | Other SLE patients | Intervention: 48<br>Control: 27 | Fatigue<br>FACIT-Fatigue: baseline: 27.9 (29.3)<br>post: 32.8 (30.5)<br>ES: 0.16 (-0.24-0.57)<br>VAS Fatigue: baseline: 49.5 (71.0)<br>post: 33.4 (71.0). ES 0.23 (-0.19-0.64)<br>Pain<br>VAS Pain: baseline: 41.7 (67.2)<br>post: 33.5 (65.5). ES 0.12 (-0.28-0.53)<br>Patient satisfaction<br>97.9% satisfied with programme, 97.9% confidence to continue physical activity, 80.4% increased physical activity.                                                                                                                               | Fatigue: NA<br>Pain: NA<br>Patient satisfaction: Yes                 | 10; I  | Sheikh, 2019 [27]  |
| P: Wearing of pedometer + face-to-face physical activity counselling + follow up phone calls<br>C: Usual care | Other SLE patients | Intervention: 38<br>Control: 38 | Fatigue<br>FSS<br>Counselling: baseline 3.4 (1.5) Control: baseline 3.5 (1.7). T12 vs T10 (group x time): B -0.14<br>p=0.64<br>HRQoL<br>Greater improvements at week 12 in SF-36 VT scores in counselling versus control group<br>no differences for other subscales.<br>Sleep<br>PSQI<br>Counselling: baseline 6.6 (3.2) Control: baseline 6.2 (3.3). T12 vs T10 (group x time): B -1.24<br>p<0.01<br>Physical activity<br>Daily steps<br>Counselling: baseline 5820 intervention: 7129<br>Control: baseline 2941 intervention: 6227<br>p<0.001 | Fatigue: No<br>HRQoL: Yes/No<br>Sleep: Yes<br>Physical activity: Yes | 11; I  | Wu, 2019 [28]      |

| Intervention/management strategy                                                                                                                                                                             | Comparator         | N                               | Results                                                                                                                                                                                                                                                                                                                                                                                                                                                                                                                                                                                                                                                                                                                                    | Efficacy                                                                                                 | SD&OA* | Reference                  |
|--------------------------------------------------------------------------------------------------------------------------------------------------------------------------------------------------------------|--------------------|---------------------------------|--------------------------------------------------------------------------------------------------------------------------------------------------------------------------------------------------------------------------------------------------------------------------------------------------------------------------------------------------------------------------------------------------------------------------------------------------------------------------------------------------------------------------------------------------------------------------------------------------------------------------------------------------------------------------------------------------------------------------------------------|----------------------------------------------------------------------------------------------------------|--------|----------------------------|
| <p>P: Moderate to vigorous intensity aerobic exercise</p> <p>C: Physical activity guidelines and basic nutritional information</p>                                                                           | Other SLE patients | Intervention: 26<br>Control: 32 | <p>Depressive symptoms<br/>BDI change<br/>Exercise: -4.03 (1.81)<br/>Control: .2.25 (1.59).<br/>p=0.475</p> <p>Fatigue<br/>General fatigue change<br/>Exercise: -2.57 (1.07)<br/>Control: 0.29 (0.94). p=0.049</p> <p>HRQoL<br/>PCS change<br/>Exercise: 2.83 (2.15)<br/>Control: 0.49 (2.06). p=0.448<br/>MCS change<br/>Exercise: 6.51 (2.63)<br/>Control: 2.12 (2.47). p=0.237</p> <p>Psychological stress<br/>PSS change<br/>Exercise: -1.6 (1.2)<br/>Control: -1.2 (1.06). p=0.805</p> <p>Sleep<br/>PSQI change<br/>Exercise: -0.63 (0.73)<br/>Control: -0.96 (0.66).<br/>p=0.744</p>                                                                                                                                                 | <p>Depressive symptoms: No<br/>Fatigue: Yes<br/>HRQoL: No<br/>Psychological stress: No<br/>Sleep: No</p> | 10; I  | Gavilan-Carrera, 2020 [29] |
| <p>P: Strengthening and stretching upper limb exercises</p> <p>C: Four sessions of training in alternative methods of performing daily activities, use of aids, joint protection and energy conservation</p> | Other SLE patients | Intervention: 31<br>Control: 27 | <p>DASH<br/>Exercise w0: 39.02 (16.10)<br/>w12: 21.49 (16.19). p&lt;0.001<br/>Control w0: 43.08 (16.39)<br/>w12: 38.38 (16.29). p=0.058</p> <p>HAQ<br/>Exercise w0: 0.81 (0.45)<br/>w12: 0.45 (0.45). p&lt;0.001<br/>Control w0: 1.10 (0.55)<br/>w12: 1.04 (0.49). p=0.420</p> <p>HRQoL<br/>LupusQoL PH<br/>Exercise w0: 56.44 (22.62)<br/>w12: 72.95 (21.54). p&lt;0.001<br/>Control w0: 51.25 (20.62)<br/>w12: 53.33 (22.12). p=0.527</p> <p>Physical fitness<br/>Exercise group: improvement in grip strength, pinch strength and Purdue test at week 12 compared with baseline (p&lt;0.001 for all).<br/>Control group: improvement in Purdue test at week 12 compared with baseline (p=0.001). No differences in other variables.</p> | <p>DASH: Yes<br/>HAQ: Yes<br/>HRQoL: Yes<br/>Physical fitness: Yes</p>                                   | 11; W  | Keramiotou, 2020 [30]      |
| <p>P: Whole body vibration exercises (WBVE)</p> <p>C: Whole body vibration exercise</p>                                                                                                                      | Healthy controls   | Intervention: 18<br>Control: 9  | <p>Muscle activation<br/>Increase in 100-200% in muscle activation at 30 Hz compared with 0 Hz<br/>p&lt;0.05 for Vastus lateralis.</p>                                                                                                                                                                                                                                                                                                                                                                                                                                                                                                                                                                                                     | Muscle activation: Yes                                                                                   | 11; I  | Dionello, 2021 [31]        |

| Intervention/management strategy                                                                                                                                   | Comparator         | N                                | Results                                                                                                                                                                                                                                                                                                                                                                     | Efficacy                                                                         | SD&OA* | Reference              |
|--------------------------------------------------------------------------------------------------------------------------------------------------------------------|--------------------|----------------------------------|-----------------------------------------------------------------------------------------------------------------------------------------------------------------------------------------------------------------------------------------------------------------------------------------------------------------------------------------------------------------------------|----------------------------------------------------------------------------------|--------|------------------------|
| P: Home-based moderate-intensity aerobic exercise and resistance training.<br>C: Usual care                                                                        | Other SLE patients | Intervention: 12<br>Control: 11  | Physical fitness<br>Fitness index: improvement at 12 weeks in intervention group (p=0.042) but not in the control group (p=1.0)<br>Go/no-go test: improvement in reaction time (p=0.036) and performance index (p=0.024) at 12 weeks in intervention group (p=0.042) but not in the control group.                                                                          | Physical fitness: Yes                                                            | 10; I  | Kao, 2021 [32]         |
| P: Whole body vibration exercises (WBVE)<br>C: Isometry training programme                                                                                         | Other SLE patients | Intervention: 11<br>Control: 10  | Fatigue<br>Mean difference in FACIT-F score: 6.63 (0.64-12.60)<br>p=0.03<br><br>Functional ability<br>No significant changes in TUG scores<br><br>Functional impairment<br>No significant changes in HAQ scores<br><br>HRQoL<br>No significant changes in SF-36 scores                                                                                                      | Fatigue: Yes<br>Functional ability: No<br>Functional impairment: No<br>HRQoL: No | 11; W  | Lopes-Souza, 2021 [33] |
| P: No intervention.<br>Exposure: sedentary behaviour, as per one item from the Rapid Assessment of Physical Activity (RAPA).<br>C: Self-reported physical activity | Other SLE patients | Intervention: 41<br>Control: 184 | Depression<br>Adjusted Risk of Incident Depression= Intervention group (physically Inactive): 3.88 (95% Confidence interval =1.67, 9.03)<br>Control group (physically Active): 1<br><br>Disease activity<br>SLEDAI= physically Inactive: 2.6(2.7)<br>physically Active: 2.9(3.0)<br><br>Organ damage<br>SDI= physically Inactive: 2.2 (2.1)<br>physically Active: 1.7 (1.9) | Depression: Yes<br>Disease activity:<br>Organ damage:                            | 5; R   | Patterson, 2021 [34]   |
| <b>Patient education and self-management</b>                                                                                                                       |                    |                                  |                                                                                                                                                                                                                                                                                                                                                                             |                                                                                  |        |                        |

| Intervention/management strategy                                | Comparator         | N                                                    | Results                                                                                                                                                                                                                                                                                                                                                                                                                                                                                                                                                                                                                                                                                                                                                   | Efficacy                                                                                                       | SD&OA* | Reference        |
|-----------------------------------------------------------------|--------------------|------------------------------------------------------|-----------------------------------------------------------------------------------------------------------------------------------------------------------------------------------------------------------------------------------------------------------------------------------------------------------------------------------------------------------------------------------------------------------------------------------------------------------------------------------------------------------------------------------------------------------------------------------------------------------------------------------------------------------------------------------------------------------------------------------------------------------|----------------------------------------------------------------------------------------------------------------|--------|------------------|
| <p>P: Attend a self-management course</p> <p>C: Usual care</p>  | Other SLE patients | Intervention: 21<br>Control: 20                      | <p>Fatigue</p> <p>IG: before intervention: 27.7 (10.3)<br/>after intervention: 24.8 (10.4)</p> <p>CG: before intervention: 21.7 (9.6)<br/>after intervention: 25.5 (10.1)<br/>p=0.049</p> <p>Depression</p> <p>IG: before intervention: 12.8 (9.1)<br/>after intervention: 11.1 (9.0)</p> <p>CG: before intervention: 8.3 (7.3)<br/>after intervention: 10.9 (5.0)<br/>p=0.025</p> <p>Pain</p> <p>No significant differences in the mean scores for pain<br/>p=0.469</p> <p>Self-efficacy</p> <p>Self-efficacy improved after the intervention<br/>p=0.001</p> <p>Coping skills</p> <p>IG: before intervention: 65.2 (19.8)<br/>after intervention: 68.2 (20.3)/ CG: before intervention: 71.7 (16.1)<br/>after intervention: 68.6 (16.3)<br/>p=0.007</p> | <p>Fatigue: Yes</p> <p>Depression: Yes</p> <p>Pain: No</p> <p>Self-efficacy: Yes</p> <p>Coping skills: Yes</p> | 10; I  | Sohng, 2003 [35] |
| <p>P: Educational programme</p> <p>C: Educational programme</p> | SSc patients       | Intervention: 5 with SSc, 5 with SLE<br>Control: N/A | <p>Overall satisfaction with both programmes, however SLE revealed a more positive feeling about their attendance. Both groups felt that it was valuable to meet individuals with the same disease and welcomed an educator within the program planning team. Both groups were unanimously satisfied with the content and format. Behaviour-wise, SLE patients revealed more definite life changes than SSc patients.</p>                                                                                                                                                                                                                                                                                                                                 | Yes                                                                                                            | 9; R   | Brown, 2004 [36] |



| Intervention/management strategy                                                                                                                                        | Comparator                      | N                              | Results                                                                                                                                                                                                                                                                                                                                                                                                                                                                                                                                      | Efficacy                                                                                | SD&OA* | Reference            |
|-------------------------------------------------------------------------------------------------------------------------------------------------------------------------|---------------------------------|--------------------------------|----------------------------------------------------------------------------------------------------------------------------------------------------------------------------------------------------------------------------------------------------------------------------------------------------------------------------------------------------------------------------------------------------------------------------------------------------------------------------------------------------------------------------------------------|-----------------------------------------------------------------------------------------|--------|----------------------|
| <p>P: Attend a psychoeducational group combining functional strategy training and psychosocial support (MINDFULL program)</p> <p>C: N/A: intraindividual assessment</p> | N/A; intraindividual assessment | Intervention: 17<br>Control: - | <p>Depression<br/>BDI: improved from 16.3 (9.5) to 10.9 (5.0)<br/>p=0.022</p> <p>Metamemory<br/>before MINDFULL: 3.42 (0.14)<br/>after MINDFULL: 3.65 (0.20)<br/>p=0.00003</p> <p>Memory Functioning<br/>Kinds of memory problems<br/>2.88 (0.96) 3.94 (0.85)<br/>p=0.003<br/>Frequency of forgetting 4.16 (0.58) 4.47 (0.81) p=0.123<br/>Seriousness of forgetting<br/>2.98 (0.68) 3.10 (0.85)<br/>p=0.649<br/>Mnemonic usage 2.30 (0.88)<br/>1.84 (0.59) p=0.032<br/>Retrospective functioning<br/>2.29 (0.97) 3.08 (1.29)<br/>p=0.020</p> | <p>Depression: Yes<br/>Metamemory: Yes<br/>Memory Functioning: Yes/<br/>No</p>          | 10; I  | Harrison, 2005 [37]  |
| <p>P: Take part in a patient education program</p> <p>C: N/A: intraindividual assessment</p>                                                                            | N/A; intraindividual assessment | Intervention: 13<br>Control: - | <p>Quality of life<br/>General health= from 47.3 (17.5) to 56.0 (13.2)<br/>p=0.029<br/>Mental health= from 76.7 (SD 16.3) to 84.0 (10.9)<br/>p=0.091</p> <p>Pain<br/>Non-significant (no detailed data provided)</p> <p>Fatigue<br/>Non-significant (no detailed data provided)</p> <p>Physical well-being<br/>Non-significant (no detailed data provided)</p>                                                                                                                                                                               | <p>Quality of life: Yes/No<br/>Pain: No<br/>Fatigue: No<br/>Physical well-being: No</p> | 9; R   | Miljeteig, 2009 [38] |
| <p>P: Attend the Chronic Disease Self-Management Program (CDSMP)</p> <p>C: N/A: intraindividual assessment</p>                                                          | N/A; intraindividual assessment | Intervention: 45<br>Control: - | <p>Quality of life<br/>Mean change=2.4, p=0.032</p> <p>Self-efficacy<br/>Mean change=0.5, p=0.035</p> <p>Self-management behaviours<br/>Mean change=0.3, p=0.036</p>                                                                                                                                                                                                                                                                                                                                                                         | <p>Quality of life: Yes<br/>Self-efficacy: Yes<br/>Self-management behaviours: Yes</p>  | 10; I  | Drenkard, 2012 [39]  |

| Intervention/management strategy                                                                                                                  | Comparator         | N                               | Results                                                                                                                                                                                                                                                                                                                               | Efficacy                                                                 | SD&OA* | Reference            |
|---------------------------------------------------------------------------------------------------------------------------------------------------|--------------------|---------------------------------|---------------------------------------------------------------------------------------------------------------------------------------------------------------------------------------------------------------------------------------------------------------------------------------------------------------------------------------|--------------------------------------------------------------------------|--------|----------------------|
| <p>P: Education regarding SLE and its management including lifestyle modifications</p> <p>C: Usual care</p>                                       | Other SLE patients | Intervention: 21<br>Control: 20 | <p>Medication adherence<br/>Test group: pre-counselling: 3<br/>post-counselling: 5.8<br/>Control group: pre-counselling: 2.9<br/>post-counselling: 4.6<br/>p&lt;0.05</p> <p>Medication knowledge<br/>Test group: m0: 5.52<br/>m2: 16.13<br/>Control group: m0 6.68<br/>m2: 7.54<br/>p&lt;0.001</p>                                    | Medication adherence: Yes<br>Medication knowledge: Yes                   | 11; W  | Ganachari, 2012 [40] |
| <p>P: Standardised daily cellular text message reminders (CTMR) for HCQ intake as prescribed + printed information sheet</p> <p>C: Usual care</p> | Other SLE patients | Intervention: 19<br>Control: 22 | <p>Medication adherence<br/>No improvement in HCQ blood levels</p> <p>Visit adherence<br/>Visit adherence improved significantly by &gt; 80% among those who were non adherent to clinic visits at baseline (p=0.01)</p> <p>Disease activity<br/>No significant changes</p>                                                           | Medication adherence: No<br>Visit adherence: Yes<br>Disease activity: No | 11; W  | Ting, 2012 [41]      |
| <p>P: Take part in BLESS (Balancing Lupus Experience with Stress Strategies) study</p> <p>C: Usual care</p>                                       | Other SLE patients | Intervention: 15<br>Control: 15 | <p>Health distress<br/>Mean difference Post intervention= IG: -0.94<br/>CG: 0.31</p> <p>Self-efficacy<br/>Mean difference Post intervention= IG:19.17<br/>CG: -3.21</p> <p>Depression<br/>Mean difference Post intervention= IG: -7.21<br/>CG: 2.89</p> <p>Anxiety<br/>Mean difference Post intervention= IG: 0.58;<br/>CG: -1.81</p> | Health distress:<br>Self-efficacy:<br>Depression:<br>Anxiety:            | 11; W  | Williams, 2014 [42]  |

| Intervention/management strategy                                                                                                                                                                                           | Comparator         | N                               | Results                                                                                                                                                                                                                                                                                                                                                                                                                                                                                                                                                                                                                                                                                                                                                                                                                                                                                                                                                                                          | Efficacy                                                                                                               | SD&OA* | Reference          |
|----------------------------------------------------------------------------------------------------------------------------------------------------------------------------------------------------------------------------|--------------------|---------------------------------|--------------------------------------------------------------------------------------------------------------------------------------------------------------------------------------------------------------------------------------------------------------------------------------------------------------------------------------------------------------------------------------------------------------------------------------------------------------------------------------------------------------------------------------------------------------------------------------------------------------------------------------------------------------------------------------------------------------------------------------------------------------------------------------------------------------------------------------------------------------------------------------------------------------------------------------------------------------------------------------------------|------------------------------------------------------------------------------------------------------------------------|--------|--------------------|
| <p>P: 0 to 3 months: high + low-moderate intensity aerobic exercise + education+ individual coaching.</p> <p>4 to 12 months: high + low-moderate intensity aerobic exercise + individual coaching</p> <p>C: Usual care</p> | Other SLE patients | Intervention: 18<br>Control: 17 | <p><b>Aerobic capacity</b><br/>Exercise group: significant improvement in VO2 max, 60% max and 80% max at month 12 compared with baseline.<br/>No significant differences between exercise and control groups.</p> <p><b>Disease activity</b><br/>Exercise: baseline 1 (0–8) month 12 4 (2–6)<br/>Control: baseline 2 (0–3) month 12 2 (0–5)<br/>P: intragroup=0.25 intergroup: 0.14.</p> <p><b>HRQoL</b><br/>No significant improvement in SF-36 subscales in the exercise and control groups at month 12 compared with baseline.<br/>Exercise group showed a greater improvement in SF-36 MH than control (group x time p value= 0.05)</p> <p><b>Organ Damage</b><br/>No significant increase in SDI score in exercise and control groups. No significant differences between groups at month 12.</p> <p><b>Physical activity</b><br/>The frequency of self-reported physical activity at high intensity increased for the exercise and control groups at month 12 compared with baseline.</p> | <p>Aerobic capacity: Yes/No<br/>Disease activity: No<br/>HRQoL: No<br/>Organ Damage: No<br/>Physical activity: Yes</p> | 11; I  | Bostrom, 2016 [18] |
| <p>P: 3 phases targeted nursing</p> <p>C: Regular specific nursing</p>                                                                                                                                                     | Other SLE patients | Intervention: 58<br>Control: 58 | <p><b>Medication adherence</b><br/>Compliance score= 15.6(2.2). Significantly high in comparison with patients of the regular special nursing group<br/>P value= 0.033</p> <p><b>Disease activity</b><br/>Target group: 6.2 (1.3)<br/>Control group: 8.4 (1.5)<br/>P value= 0.026</p> <p><b>Organ damage</b><br/>Target group: 18.5 (4.2)<br/>Control group: 27.2 (4.6)<br/>P value=0.023</p> <p><b>Quality of life</b><br/>(Does not mention which item of the SF-36)<br/>Target group: 86.9 (15.5)<br/>Control group: 72.4 (12.6)<br/>P value= 0.026</p>                                                                                                                                                                                                                                                                                                                                                                                                                                       | <p>Medication adherence: Yes<br/>Disease activity: Yes<br/>Organ damage: Yes<br/>Quality of life: Yes</p>              | 11; W  | Zhang, 2016 [43]   |

| Intervention/management strategy                                                                                                                              | Comparator                      | N                               | Results                                                                                                                                                                                                                                                                                                                                                                                                                                                                                                                                                                                                                                                                      | Efficacy                                                                                      | SD&OA* | Reference            |
|---------------------------------------------------------------------------------------------------------------------------------------------------------------|---------------------------------|---------------------------------|------------------------------------------------------------------------------------------------------------------------------------------------------------------------------------------------------------------------------------------------------------------------------------------------------------------------------------------------------------------------------------------------------------------------------------------------------------------------------------------------------------------------------------------------------------------------------------------------------------------------------------------------------------------------------|-----------------------------------------------------------------------------------------------|--------|----------------------|
| <p>P: Take part in FAME (Fatigue and Activity Management Education) = 1 h group education / 1 h individual goal</p> <p>C: N/A: intraindividual assessment</p> | N/A; intraindividual assessment | Intervention: 21<br>Control: -  | <p>Fatigue nonsignificant improvements<br/>T1/T2 p=.370<br/>T2/T3 p=1.000<br/>T1/T3 p=0.306</p> <p>Self-Efficacy nonsignificant improvements<br/>T1/T2 p=0.126<br/>T2/T3 p=0.4572<br/>T1/T3 p=0.056</p> <p>Anxiety nonsignificant improvements<br/>T1/T2 p=0.722<br/>T2/T3 p=0.229<br/>T1/T3 p=0.342</p> <p>Depression<br/>T1 median:6<br/>T3 median:4<br/>T1/T3 p=0.050</p> <p>Quality of life<br/>Category "burden to others":<br/>T1 median 53.17<br/>T2 median: 63.10<br/>T3 median: 55<br/>T1/T2=0.046<br/>T2/T3= 0.033<br/>Category "fatigue":<br/>T1 median 38.99<br/>T2 median: 44.94<br/>T3 median: 34.58<br/>T1/T2 p=0.016<br/>T2/T3 p=0.044<br/>T1/T3 p=0.860</p> | Fatigue: No<br>Self-Efficacy: No<br>Anxiety: No<br>Depression: Yes<br>Quality of life: Yes/No | 10; I  | O'Riordan, 2017 [44] |
| <p>P: 3-year CVD prevention counselling program</p> <p>C: N/A: intraindividual assessment</p>                                                                 | N/A; intraindividual assessment | Intervention: 121<br>Control: - | <p>CVD risk<br/>Systolic blood pressure improvement (-6.12 +/- 2.16 mm Hg p&lt;0.05)<br/>Prevalence of abnormal cholesterol profile decreased with significant improvements in mean HDL (+5.4 +/- 0.36 mg/dl p&lt;0.0001) and triglyceride levels (-12.6 +/- 5.40 mg/dl p&lt;0.05)</p>                                                                                                                                                                                                                                                                                                                                                                                       | CVD risk: Yes                                                                                 | 10; I  | Yelnik, 2017 [45]    |
| <p>P: Session of mentoring</p> <p>C: N/A: intraindividual assessment</p>                                                                                      | N/A; intraindividual assessment | Intervention: 36<br>Control: -  | <p>Self-care agency Improved by 19.93%</p> <p>Self-care activity Improved by 17.53%</p> <p>Quality of life Improved by 12.19%.</p>                                                                                                                                                                                                                                                                                                                                                                                                                                                                                                                                           | Self-care agency: Yes<br>Self-care activity: Yes<br>Quality of life: Yes                      | 10; I  | Kusnanto, 2018 [46]  |

| Intervention/management strategy                                                                                                                        | Comparator                      | N                              | Results                                                                                                                                                                                                                                                                                                                                                                                                                                                                                                                                                                                                                                                                                                                                                                                                                                                                                                                                                    | Efficacy                                                                                                                                                        | SD&OA* | Reference           |
|---------------------------------------------------------------------------------------------------------------------------------------------------------|---------------------------------|--------------------------------|------------------------------------------------------------------------------------------------------------------------------------------------------------------------------------------------------------------------------------------------------------------------------------------------------------------------------------------------------------------------------------------------------------------------------------------------------------------------------------------------------------------------------------------------------------------------------------------------------------------------------------------------------------------------------------------------------------------------------------------------------------------------------------------------------------------------------------------------------------------------------------------------------------------------------------------------------------|-----------------------------------------------------------------------------------------------------------------------------------------------------------------|--------|---------------------|
| <p>P: Follow a web-based educational program + answer module questions on an online social media forum with other participants</p> <p>C: Usual care</p> | Other SLE patients              | Intervention:13<br>Control: 14 | <p>Medication adherence (to HCQ)<br/>MPR:<br/>SM group: w0: 0.75(0.06)<br/>w6: 0.92 (0.03)<br/>p&lt;0.001<br/>Control group: w0: 0.79 (0.7)<br/>w6 =0.81 (0.05)<br/>p=0.56</p> <p>MASRI:<br/>SM group: w0: 85.4 (6.7)<br/>w6: 84.2 (7.7)<br/>p=0.044<br/>Control group: w0: 87.8 (4.0)<br/>w6 = 90.4 (2.4) p=0.76</p> <p>Stress<br/>PSQ did not improve significantly (p=0.35)</p> <p>Self-efficacy<br/>CASE<br/>SM group: w0: 34.3 (3.4)<br/>w6:38.5 (3.4)<br/>P value= 0.04<br/>Control group: w0: 37.0 (2.9)<br/>w6 = 36.6 (2.9) p=0.47</p> <p>HRQoL<br/>SMILEY did not improve significantly (p=0.06)</p> <p>SOA (Self of agency)<br/>SM group: w0: 17.0 (1.8)<br/>w6: 20.8(1.3)<br/>P value = 0.03<br/>Control group: w0: 16.2 (1.5)<br/>w6 = 17.3 (1.2) P value =0.2</p> <p>SOC (Self of community)<br/>SM group: w0: 138.3 (13.4)<br/>w6: 168.3 (10.2)<br/>P value= 0.03<br/>Control group: w0: 143.1 (14.0)<br/>w6 = 152.2 (11.3) P value =0.4</p> | <p>Medication adherence (to HCQ): Yes/No<br/>Stress: No<br/>Self-efficacy: Yes<br/>HRQoL: No<br/>SOA (Self of agency): Yes<br/>SOC (Self of community): Yes</p> | 11; W  | Scalzi, 2018 [47]   |
| <p>P: Receive education and support by a peer-to-peer mentoring</p> <p>C: N/A: intraindividual assessment</p>                                           | N/A; intraindividual assessment | Intervention: 23<br>Control: - | <p>Quality of life<br/>Improved but not statistically significant</p> <p>Depression<br/>T1:8.28 (0.94)<br/>T2: 5.66 (0.96) p=0.057</p> <p>Anxiety<br/>T1: 7.72 (0.99)<br/>T2: 4.2 (1.02) p=0.018</p> <p>Stress<br/>T1: 8.2 (0.58)<br/>T2: 8.28 (0.6) p=0.92</p> <p>Disease activity<br/>T1:32.36 (5.36) T2:7.66(5.5)<br/>p=0.004</p>                                                                                                                                                                                                                                                                                                                                                                                                                                                                                                                                                                                                                       | <p>Quality of life: No<br/>Depression: Yes<br/>Anxiety: Yes<br/>Stress: No<br/>Disease activity: Yes</p>                                                        | 10; I  | Williams, 2018 [48] |

| Intervention/management strategy                                                                                                                         | Comparator                      | N                               | Results                                                                                                                                                                                                                                                                                                                                                                                                           | Efficacy                                                                | SD&OA* | Reference           |
|----------------------------------------------------------------------------------------------------------------------------------------------------------|---------------------------------|---------------------------------|-------------------------------------------------------------------------------------------------------------------------------------------------------------------------------------------------------------------------------------------------------------------------------------------------------------------------------------------------------------------------------------------------------------------|-------------------------------------------------------------------------|--------|---------------------|
| <p>P: To be enrolled in the Peer Approaches to Lupus Self-management (PALS) program</p> <p>C: N/A: intraindividual assessment</p>                        | N/A; intraindividual assessment | Intervention: 20<br>Control: -  | <p>Depression changes of 2.62 or 11% change p=0.05</p> <p>Anxiety score change of 3.52 or 15% change p=0.018</p> <p>Disease activity SLAQ= change score of 24.70 or 25% change p&lt;0.001</p>                                                                                                                                                                                                                     | <p>Depression: Yes</p> <p>Anxiety: Yes</p> <p>Disease activity: Yes</p> | 10; I  | Williams, 2019 [49] |
| <p>P: Use of SimpleMed+ pillbox to organise and administer medication + receiving digital reminders during 2<sup>nd</sup> month</p> <p>C: Usual care</p> | Other SLE patients              | Intervention: 8<br>Control: 11  | <p>Medication adherence</p> <p>Treatment group: 63 to 66 p&gt;0.05</p> <p>Control group: decline</p>                                                                                                                                                                                                                                                                                                              | Medication adherence: No                                                | 11; W  | Harry, 2020 [50]    |
| <p>P: Web-based education programme (3 months) followed by telephone counselling by physicians (3 months)</p> <p>C: Usual care</p>                       | Other SLE patients              | Intervention: 40<br>Control: 40 | <p>Fatigue</p> <p>Intervention</p> <p>Pre: 4.5 (1.2)</p> <p>post: 3.9 (1.3)</p> <p>p&lt;0.001</p> <p>Control</p> <p>Pre: 4.7 (1.2)</p> <p>post: 5.0 (1.4)</p> <p>p=0.001</p> <p>P intergroup: 0.001</p> <p>Self-efficacy</p> <p>Intervention</p> <p>Pre: 4.6 (2.0)</p> <p>post: 5.2 (1.9)</p> <p>p=0.002</p> <p>Control</p> <p>Pre: 4.5 (2.1)</p> <p>post: 4.3 (2.2)</p> <p>p=0.007</p> <p>P intergroup: 0.04</p> | <p>Fatigue: Yes</p> <p>Self-efficacy: Yes</p>                           | 11; W  | Kankaya, 2020 [51]  |

| Intervention/management strategy                                                                                     | Comparator         | N                               | Results                                                                                                                                                                                                                                                                                                                                                                                                                                                                                                                | Efficacy                                                                                       | SD&OA* | Reference        |
|----------------------------------------------------------------------------------------------------------------------|--------------------|---------------------------------|------------------------------------------------------------------------------------------------------------------------------------------------------------------------------------------------------------------------------------------------------------------------------------------------------------------------------------------------------------------------------------------------------------------------------------------------------------------------------------------------------------------------|------------------------------------------------------------------------------------------------|--------|------------------|
| P: App for self-tracking lifestyle activities and symptoms, and weekly telehealth coaching sessions<br>C: Usual care | Other SLE patients | Intervention: 25<br>Control: 22 | Adherence<br>Adherence App: 91.1 (50–97.3)<br>Adherence coaching: 81.3 (25.0–81.3)<br><br>Fatigue<br>FACIT-F change from baseline<br>Intervention: 4.0 (-3.5, 21.0)<br>p=0.04<br>Control: -0.5 (-5.0, 7.3)<br>p=0.75<br>P intergroup: 0.17<br><br>HRQoL<br>No significant differences between treatment groups in LupusQoL domains in the ITT population.<br><br>Pain<br>BPI Pain severity change from baseline<br>Intervention: 0.0 (-2.8, 2.3)<br>p=0.76<br>Control: 0.6 (-1.3, 1.0)<br>p=0.68<br>P intergroup: 0.73 | Adherence: N/A<br>Fatigue: Yes<br>HRQoL: No<br>Pain: No                                        | 11; W  | Khan, 2020 [52]  |
| P: PainTRAINER: 8 weeks, automated, internet-based version of pain coping skills training programme<br>C: Usual care | Other SLE patients | Intervention: 30<br>Control: 30 | HRQoL<br>Intervention: improvement in sleep disturbance, anxiety/depression, and fatigue, and LupusPRO HRQoL.<br>Control: improvement in fatigue and in LupusPRO HRQoL<br>no changes in other domains.<br><br>Pain<br>Change in pain catastrophizing<br>Intervention: -0.9 (8.9)<br>Control: 2.3 (9.6)                                                                                                                                                                                                                 | HRQoL: Yes/No<br>Pain: Yes/No                                                                  | 11; W  | Allen, 2021 [53] |
| P: Follow the Chronic Disease Self-Management Program (CDSMP)<br>C: Usual care                                       | Other SLE patients | Intervention: 24<br>Control: -  | Health literacy<br>No significant differences in pre-post changes between-group comparisons (p=0.82)<br><br>Self-efficacy<br>Self-efficacy: significant increase in mean score for the intervention group p=0.02, but not for the control group p=0.23<br><br>Patient activation<br>Treatment group (p=0.47) and control group (p=0.55).<br><br>Disease activity<br>Not statistically significant change (p=0.37)                                                                                                      | Health literacy: No<br>Self-efficacy: Yes/No<br>Patient activation: No<br>Disease activity: No | 11; W  | White, 2021 [54] |

| Intervention/management strategy                                                                                        | Comparator         | N                                  | Results                                                                                                                                                                                                                                                                                                                                                                                                                                                                                                                                                                                                                                                                                                                 | Efficacy                                                                                                                        | SD&OA* | Reference           |
|-------------------------------------------------------------------------------------------------------------------------|--------------------|------------------------------------|-------------------------------------------------------------------------------------------------------------------------------------------------------------------------------------------------------------------------------------------------------------------------------------------------------------------------------------------------------------------------------------------------------------------------------------------------------------------------------------------------------------------------------------------------------------------------------------------------------------------------------------------------------------------------------------------------------------------------|---------------------------------------------------------------------------------------------------------------------------------|--------|---------------------|
| <b>Psychological interventions</b>                                                                                      |                    |                                    |                                                                                                                                                                                                                                                                                                                                                                                                                                                                                                                                                                                                                                                                                                                         |                                                                                                                                 |        |                     |
| P: Enrolled in a Brief Supportive-Expressive Group Psychotherapy + "booster sessions" for 3 months<br><br>C: Usual care | Other SLE patients | Intervention: 64<br>Control: 64    | Psychological distress<br>No clinically important group differences<br><br>Quality of life<br>No clinically important group differences<br><br>Disease Activity<br>No clinically important group differences<br><br>Organ damage<br>No clinically important group differences<br><br>Health service utilization<br>No clinically important group differences                                                                                                                                                                                                                                                                                                                                                            | Psychological distress: No<br>Quality of life: No<br>Disease Activity: No<br>Organ damage: No<br>Health service utilization: No | 11; I  | Dobkin, 2002 [55]   |
| P: Enrolled in a Brief Supportive-Expressive Group Psychotherapy + "booster sessions" for 3 months<br><br>C: Usual care | Other SLE patients | Intervention: 58<br>Control: 66    | Illness intrusiveness<br>Significant reductions in illness intrusiveness for 2 of 3 domains: (1) relationships and personal development and (2) intimacy                                                                                                                                                                                                                                                                                                                                                                                                                                                                                                                                                                | Illness intrusiveness: Yes                                                                                                      | 11; W  | Edworthy, 2003 [56] |
| P: Receive biofeedback-assisted cognitive behavioural treatment (BF/CBT)<br><br>C: Usual care                           | Other SLE patients | Intervention: 32<br>Control: 27+33 | Pain<br>Pain and psychological dysfunction= BF/CBT had significantly greater reductions compared with SMS group (p=0.044) and UC group p=0.028<br><br>Psychological functioning<br>BF/CBT greater reductions compared with SMS group (p<0.001) and UC group p<0.001)<br>9-month follow up<br>BF/CBT continued to exhibit relative benefit compared with UC in psychological functioning (p=0.023)<br>Physical functioning<br>BF/CBT significantly greater improvement compared with UC(p=0.035), and marginally significant improvement relative to SMS (p=0.097)<br><br>Disease activity<br>changes in BF/CBT group not significantly different from those found for the SMS group (p=0.220) or the UC group (p=0.372) | Pain: Yes<br>Psychological functioning: Yes<br>Physical functioning: Yes<br>Disease activity: No                                | 11; I  | Greco, 2004 [57]    |



| Intervention/management strategy                                                                                                                                                                          | Comparator         | N                               | Results                                                                                                                                                                                                                                                                                                                                                                                                                                                                                                                                                                                                                                                                                                           | Efficacy                                                                                                                                                                 | SD&OA* | Reference          |
|-----------------------------------------------------------------------------------------------------------------------------------------------------------------------------------------------------------|--------------------|---------------------------------|-------------------------------------------------------------------------------------------------------------------------------------------------------------------------------------------------------------------------------------------------------------------------------------------------------------------------------------------------------------------------------------------------------------------------------------------------------------------------------------------------------------------------------------------------------------------------------------------------------------------------------------------------------------------------------------------------------------------|--------------------------------------------------------------------------------------------------------------------------------------------------------------------------|--------|--------------------|
| <p>P: Discussion between educator, patient, and partner, after a regular visit for medical care + telephone follow up</p> <p>C: 45-minute video presentation about lupus, and monthly telephone calls</p> | Other SLE patients | Intervention: 64<br>Control: 58 | <p>HRQoL</p> <p>SF-36 MCS:<br/>Intervention: 69 (26).<br/>Control: 58 (23)<br/>p=0.04.</p> <p>SF-36 PCS:<br/>Intervention: 55 (25).<br/>Control: 48 (25)<br/>p=0.20.</p> <p>Disease activity<br/>No significant differences in SLAQ scores.<br/>Fatigue<br/>Intervention: 5.1 (2.4).<br/>Control: 6.3 (2.4)<br/>p=0.02.<br/>Self-efficacy<br/>Intervention: 7.2 (1.9).<br/>Control: 6.2 (2.0)<br/>p=0.02.<br/>Social support<br/>Intervention: 4.4 (0.6).<br/>Control: 4.1 (0.6)<br/>p=0.03.</p>                                                                                                                                                                                                                  | <p>HRQoL: Yes/No<br/>Disease activity: No<br/>Fatigue: Yes<br/>Self-efficacy: Yes<br/>Social support: Yes</p>                                                            | 11; W  | Karlson, 2004 [58] |
| <p>P: Application of the Cognitive-Behaviour Therapy based on the Chronic Illness Self-Management Course</p> <p>C: Usual care</p>                                                                         | Other SLE patients | Intervention: 11<br>Control: 22 | <p>Physical health status<br/>No significant differences in SF-36 PCS scores.</p> <p>Anxiety and depression<br/>Significant reduction in total HADS score (p&lt;0.01), but not in CES-D depression.</p> <p>Dysfunctional cognitions<br/>Significant reductions in self-criticism (p&lt;0.002) and helplessness (p&lt;0.01), but not in other domains.</p> <p>Fatigue<br/>Significant main effect, favouring the intervention group (p&lt;0.02)</p> <p>Illness representations<br/>Significant main effect, favouring the intervention group in identity, treatment control and emotional representations (p&lt;0.05).</p> <p>Stress<br/>Significant main effect, favouring the intervention group (p&lt;0.02)</p> | <p>Physical health status: No<br/>Anxiety and depression: Yes/No<br/>Dysfunctional cognitions: Yes<br/>Fatigue: Yes<br/>Illness representations: Yes<br/>Stress: Yes</p> | 10; I  | Goodman, 2005 [59] |

| Intervention/management strategy                                                                                                             | Comparator         | N                               | Results                                                                                                                                                                                                                                                                                                                                                                   | Efficacy                                                                                                                                            | SD&OA* | Reference        |
|----------------------------------------------------------------------------------------------------------------------------------------------|--------------------|---------------------------------|---------------------------------------------------------------------------------------------------------------------------------------------------------------------------------------------------------------------------------------------------------------------------------------------------------------------------------------------------------------------------|-----------------------------------------------------------------------------------------------------------------------------------------------------|--------|------------------|
| <p>P: Group session focused on psychoeducative and psychotherapeutic elements</p> <p>C: Same intervention 6 months later (waiting group)</p> | Other SLE patients | Intervention: 26<br>Control: 8  | <p>Psychological distress<br/>Aggression domain: 51.62 (10.20) p&lt;0.001</p> <p>Quality of life<br/>Social functioning domain: 67.65 (27.20) p&lt;0.05</p> <p>Depression<br/>HADS-D 6 months: 5.38 (3.67) p&lt;0.01</p> <p>Control convictions<br/>Follow up (12 months) 40.26 (33.74) p&lt;0.05</p> <p>Social life<br/>Follow up (12 months) 35.15 (5.71) p&lt;0.01</p> | <p>Psychological distress: Yes/No</p> <p>Quality of life: Yes/No</p> <p>Depression: Yes</p> <p>Control convictions: Yes</p> <p>Social life: Yes</p> | 10; I  | Haupt, 2005 [60] |
| <p>P: Enrolled in a psychosocial group program organized by Community Rehabilitation Network</p> <p>C: Usual care</p>                        | Other SLE patients | Intervention: 56<br>Control: 20 | <p>Mental health<br/>Improvement GHQ-30 and all items post intervention compared with baseline (p&lt;0.001 for all). No improvement in control group.</p> <p>Self-esteem<br/>Increase in RSEW score post intervention (28.1) compared with baseline (4.5) p&lt;0.001. No increase in control group.</p>                                                                   | <p>Mental health: Yes</p> <p>Self-esteem: Yes</p>                                                                                                   | 10; R  | Ng, 2007 [61]    |

| Intervention/management strategy                                                                                  | Comparator         | N                               | Results                                                                                                                                                                                                                                                                                                                                                                                                                                                                                                                                                                                                                                                                                                                                                                                     | Efficacy                                                                                                     | SD&OA* | Reference                      |
|-------------------------------------------------------------------------------------------------------------------|--------------------|---------------------------------|---------------------------------------------------------------------------------------------------------------------------------------------------------------------------------------------------------------------------------------------------------------------------------------------------------------------------------------------------------------------------------------------------------------------------------------------------------------------------------------------------------------------------------------------------------------------------------------------------------------------------------------------------------------------------------------------------------------------------------------------------------------------------------------------|--------------------------------------------------------------------------------------------------------------|--------|--------------------------------|
| <p>P: Attend 10 Cognitive-Behaviour Therapy sessions</p> <p>C: General recommendations about health lifestyle</p> | Other SLE patients | Intervention: 21<br>Control: 24 | <p>Quality of life</p> <p>Physical role:<br/>T0-T3= TG: 0.15<br/>CG: 0.30<br/>T0-T9= TG: 0.20<br/>CG: 0.45<br/>T0-T15= TG: 0.40<br/>CG: 0.47</p> <p>Disease activity<br/>No significant changes<br/>T3 p=0.085<br/>T9: p=0.268<br/>T15: p=0.688</p> <p>Stress<br/>T3<br/>TG: 7.8 (4) p=0.017<br/>CG: 11.6 (6)<br/>T9<br/>TG: 7.5 (6.6) p=0.050<br/>CG: 11.3 (6.1)<br/>T15<br/>TG: 6.3 (6.3) p=0.001<br/>CG: 12.1 (5.5)</p> <p>Depression<br/>T3<br/>TG: 7.8(6.6) p=0.006<br/>CG: 16.6 (11.2)<br/>T9<br/>TG :10.3 (9.4) p=0.161<br/>CG: 17.1 (13.1)<br/>T15<br/>TG: 7.6(7.2) p=0.003<br/>CG: 16.5 (10.8)</p> <p>Anxiety<br/>T3<br/>TG 44 (31) p=0.008<br/>CG: 69.1 (26.3)<br/>T9<br/>TG: 43.4 (33.6) p=0.064<br/>CG: 62.2 (30.4)<br/>T15<br/>TG: 42.4 (26.4) p=0.007<br/>CG: 66.5 (27.3)</p> | <p>Quality of life: Yes/No<br/>Disease activity: No<br/>Stress: Yes<br/>Depression: Yes<br/>Anxiety: Yes</p> | 11; W  | Navarrete-Navarrete, 2010 [62] |
| <p>P: Attend 10 Cognitive-Behaviour Therapy sessions</p> <p>C: General recommendations about health lifestyle</p> | Other SLE patients | Intervention: 18<br>Control: 16 | <p>Quality of life<br/>MCS: [F= (1.19).0.627<br/>p&lt;0.035]<br/>PCS: [F= (1.19).0.434<br/>p&lt;0.078]</p> <p>Anxiety (predictor of MCS)<br/>R2 corrected: 0.689, T: -7.294, p&lt;0.00</p>                                                                                                                                                                                                                                                                                                                                                                                                                                                                                                                                                                                                  | <p>Quality of life: Yes/No<br/>Anxiety (predictor of MCS):<br/>Yes</p>                                       | 11; W  | Navarrete-Navarrete, 2010 [63] |

| Intervention/management strategy                                                                               | Comparator         | N                                   | Results                                                                                                                                                                                                                                                                                                                                                                                                                                             | Efficacy                                                                                                                                                                                            | SD&OA* | Reference        |
|----------------------------------------------------------------------------------------------------------------|--------------------|-------------------------------------|-----------------------------------------------------------------------------------------------------------------------------------------------------------------------------------------------------------------------------------------------------------------------------------------------------------------------------------------------------------------------------------------------------------------------------------------------------|-----------------------------------------------------------------------------------------------------------------------------------------------------------------------------------------------------|--------|------------------|
| <p>P: Follow three separate CBT modules preinstalled on a CD ROM</p> <p>C: Educational sessions usual care</p> | Other SLE patients | Intervention: 27<br>Control: 10 +16 | <p>Pain<br/>No significant differences</p> <p>Behaviour<br/>No significant differences</p> <p>Self-perception<br/>No significant differences</p> <p>Self-efficacy<br/>No significant differences</p> <p>Quality of life<br/>No significant differences</p> <p>Disease activity<br/>No significant differences</p> <p>Social support<br/>No significant differences</p> <p>Coping skills<br/>Increase at post-hoc secondary analysis (p&lt;0.05)</p> | <p>Pain: No</p> <p>Behaviour: No</p> <p>Self-perception: No</p> <p>Self-efficacy: No</p> <p>Quality of life: No</p> <p>Disease activity: No</p> <p>Social support: No</p> <p>Coping skills: Yes</p> | 11; W  | Brown, 2012 [64] |

| Intervention/management strategy                                                                                                                        | Comparator | N      | Results                                                                                                                                                                                                                                                                                                                                                                                                                                                                                                                                                                                                                                                                                                                                                                                                                                                                                                                                            | Efficacy                                                                                                            | SD&OA* | Reference        |
|---------------------------------------------------------------------------------------------------------------------------------------------------------|------------|--------|----------------------------------------------------------------------------------------------------------------------------------------------------------------------------------------------------------------------------------------------------------------------------------------------------------------------------------------------------------------------------------------------------------------------------------------------------------------------------------------------------------------------------------------------------------------------------------------------------------------------------------------------------------------------------------------------------------------------------------------------------------------------------------------------------------------------------------------------------------------------------------------------------------------------------------------------------|---------------------------------------------------------------------------------------------------------------------|--------|------------------|
| <p>P: Cognitive-Behaviour Therapy sessions, supportive therapy, multiple psychological interventions, psychoeducational intervention.</p> <p>C: N/A</p> | N/A        | 6 RCTs | <p>Anxiety<br/>Therapy groups: significant improvement versus control (standard mean difference: = -0.95, 95%CI: (-1.57, -0.34), p&lt;0.001).</p> <p>Depression<br/>Therapy groups: significant improvement versus control (standard mean difference: = -1.14, 95%CI: (-1.84, -0.44), p&lt;0.001).</p> <p>Disease activity<br/>Therapy groups: significant improvement versus control (standard mean difference: = -0.34, 95%CI: (-0.57, -0.11), p&lt;0.001).</p> <p>Fatigue<br/>Therapy groups: no significant difference versus control (mean difference: = -0.17, 95%CI: (-0.49, 0.15), p=0.30).</p> <p>HRQoL<br/>Therapy groups: significant improvement versus control in physical function (standard mean difference: = 7.65, 95%CI: (0.16, -15.13), p=0.05), but not in mental health.</p> <p>Stress<br/>Therapy groups: significant improvement versus control (standard mean difference: = -0.63, 95%CI: (-1.02, -0.23), p&lt;0.001).</p> | <p>Anxiety: Yes<br/>Depression: Yes<br/>Disease activity: Yes<br/>Fatigue: No<br/>HRQoL: Yes/No<br/>Stress: Yes</p> | 12; R  | Zhang, 2012 [65] |

| Intervention/management strategy                                                                                               | Comparator         | N                              | Results                                                                                                                                                                                                                                                                                                                                                                                                                                                                                                                                                                                                                                                                                          | Efficacy                                                                                              | SD&OA* | Reference        |
|--------------------------------------------------------------------------------------------------------------------------------|--------------------|--------------------------------|--------------------------------------------------------------------------------------------------------------------------------------------------------------------------------------------------------------------------------------------------------------------------------------------------------------------------------------------------------------------------------------------------------------------------------------------------------------------------------------------------------------------------------------------------------------------------------------------------------------------------------------------------------------------------------------------------|-------------------------------------------------------------------------------------------------------|--------|------------------|
| <p>P: Follow a modified BI-CBT 8 step program + Skin care education + appearance enhancement workshop</p> <p>C: Usual care</p> | Other SLE patients | Intervention: 10<br>Control: 5 | <p>Body image</p> <p>Intervention group:<br/>SIBID pre: 1.92 (0.29)<br/>SIBID 24 weeks: 1.16 (1.05)<br/>p=0.048<br/>BASS pre: 2.38 (0.84)<br/>BASS 24 weeks: 2.96 (0.76)<br/>p=0.008<br/>Control group:<br/>No significant changes</p> <p>Depression</p> <p>CES-D Intervention group:<br/>Pre: 22.60 (11.67)<br/>24 wk: 16.00 (11.65) p=0.045<br/>Control group:<br/>No significant changes</p> <p>Quality of Life</p> <p>Intervention group:<br/>pre: 40.00 (30.37)<br/>24 wk: 79.38 (27.18) p=0.001<br/>Control group:<br/>No significant changes</p> <p>Disease activity</p> <p>Intervention group:<br/>SLEDAI total score: pre 5.60 (4.88)<br/>SLEDAI total score 24 wk: 6.25 (3.77) p=1</p> | <p>Body image: Yes/No<br/>Depression: Yes/No<br/>Quality of Life: Yes/No<br/>Disease activity: No</p> | 10; I  | Jolly, 2014 [66] |
| <p>P: Cognitive-Behaviour Therapy sessions, psychoeducational intervention, expressive group psychotherapy.</p> <p>C: N/A</p>  | N/A                | 6 RCTs                         | <p>Depression</p> <p>Std. mean difference: -0.44 (-0.78 -- -0.10). p=0.01</p> <p>Disease activity</p> <p>Std. mean difference: -0.68 (-1.82--0.46). p=0.24</p> <p>Fatigue</p> <p>Std. mean difference: 0.10 (-0.19--0.39). p=0.51</p> <p>HRQoL</p> <p>PCS</p> <p>Std. mean difference: 8.85 (3.69--14.0). p&lt;0.001</p> <p>MCS</p> <p>Std. mean difference: 14.4 (-4.9--33.8). p=0.14</p> <p>Pain</p> <p>Std. mean difference: 0.35 (-0.23--0.93). p=0.23</p>                                                                                                                                                                                                                                   | <p>Depression: Yes<br/>Disease activity: No<br/>Fatigue: No<br/>HRQoL: Yes/No<br/>Pain: No</p>        | 12; R  | Liang, 2014 [67] |

| Intervention/management strategy                                                                                         | Comparator                      | N                               | Results                                                                                                                                                                                                                                                                                                                                                                                                                                                                                                                                                                                                                                       | Efficacy                                                                                                        | SD&OA* | Reference           |
|--------------------------------------------------------------------------------------------------------------------------|---------------------------------|---------------------------------|-----------------------------------------------------------------------------------------------------------------------------------------------------------------------------------------------------------------------------------------------------------------------------------------------------------------------------------------------------------------------------------------------------------------------------------------------------------------------------------------------------------------------------------------------------------------------------------------------------------------------------------------------|-----------------------------------------------------------------------------------------------------------------|--------|---------------------|
| <p>P: Follow the "Better Choice, Better Health" Chronic Disease Self-Management Program (CDSMP)</p> <p>C: Usual care</p> | Other SLE patients              | Intervention: 15<br>Control: 15 | <p>Pain<br/>d=0.96</p> <p>Psychological distress<br/>PI<br/>d=1.13<br/>4 months:<br/>d=0.78</p> <p>Depression<br/>PI:<br/>d=1.63<br/>4 months:<br/>d=1.68</p> <p>Social/role activities limitation<br/>Difference between baseline and PI<br/>LSES: -0.36<br/>STAI: -0.24<br/>BDI-II: 0.40 p&lt;0.05<br/>CSM: -0.38<br/>HSD: 0.50 p&lt;0.05</p>                                                                                                                                                                                                                                                                                               | <p>Pain: Yes<br/>Psychological distress: Yes<br/>Depression: Yes<br/>Social/role activities limitation: Yes</p> | 11; W  | Williams, 2014 [68] |
| <p>P: Participate in a mindfulness group protocol</p> <p>C: N/A: intraindividual assessment</p>                          | N/A; intraindividual assessment | Intervention: 6<br>Control: -   | Qualitative improvement                                                                                                                                                                                                                                                                                                                                                                                                                                                                                                                                                                                                                       | Coping skills: N/A                                                                                              | 4; W   | Horesh, 2017 [69]   |
| <p>P: Attend a mindfulness-based cognitive therapy</p> <p>C: General recommendations about health lifestyle</p>          | Other SLE patients              | Intervention: 23<br>Control: 23 | <p>Depression<br/>MBCT pre: 13.6 (4.1)<br/>MBCT post: 8.9 (2.3)<br/>CG pre: 12.7 (2.5)<br/>CG post: 14.4 (2.8)</p> <p>Quality of life<br/>MCS=<br/>MBCT pre: 43.7 (11.0)<br/>MBCT post: 51.6 (10.4)<br/>CG pre: 44.3 (10.8)<br/>CG post: 43.7 (11.5)<br/>p&lt;0.050<br/>PCS=<br/>MBCT pre: 44.0 (11.5)<br/>MBCT post: 49.7 (10.6)<br/>CG pre: 43.2 (10.4)<br/>CG post: 44.3 (11.7)<br/>p&gt;0.050</p> <p>Anxiety<br/>MBCT pre: 13.8 (4.2)<br/>MBCT post: 9.2 (3.5)<br/>CG pre: 13.4 (3.2)<br/>CG post: 14.5 (3.5)</p> <p>Social function<br/>MBCT pre: 15.6 (3.5)<br/>MBCT post: 8.8 (2.7)<br/>CG pre: 13.4 (3.7)<br/>CG post: 14.7 (4.1)</p> | <p>Depression: Yes<br/>Quality of life: Yes/No<br/>Anxiety: Yes<br/>Social function: Yes</p>                    | 11; I  | Solati, 2017 [70]   |

| Intervention/management strategy                                                                                  | Comparator         | N                               | Results                                                                                                                                                                                                                                                                                                                                                                                                                                                                                                                                                                                                                                                                                                                                                                                                                                                                                                                                                                                                                                                            | Efficacy                                                                                | SD&OA* | Reference            |
|-------------------------------------------------------------------------------------------------------------------|--------------------|---------------------------------|--------------------------------------------------------------------------------------------------------------------------------------------------------------------------------------------------------------------------------------------------------------------------------------------------------------------------------------------------------------------------------------------------------------------------------------------------------------------------------------------------------------------------------------------------------------------------------------------------------------------------------------------------------------------------------------------------------------------------------------------------------------------------------------------------------------------------------------------------------------------------------------------------------------------------------------------------------------------------------------------------------------------------------------------------------------------|-----------------------------------------------------------------------------------------|--------|----------------------|
| <p>P: Brief group psychoanalytic psychotherapy: 90 min session once a week for 20 weeks.</p> <p>C: Usual care</p> | Other SLE patients | Intervention: 43<br>Control: 37 | <p>Anxiety/Depression</p> <p>Anxiety<br/>Psychotherapy: baseline: 9.0 (0.0–20.0)<br/>post: 6.0 (1.0–16.0).<br/>p&lt;0.0001<br/>Control: baseline: 6.0 (1.0–16.0)<br/>post: 8.0 (1.0–18.0). p=0.132<br/>P intergroup: 0.019</p> <p>Depression<br/>Psychotherapy: baseline: 8.0 (0.0–14.0)<br/>post: 4.0 (0.0–14.0).<br/>p&lt;0.0001<br/>Control: baseline: 5.0 (1.0–16.0)<br/>post: 7.0 (1.0–17.0). p=0.081<br/>P intergroup: 0.022</p> <p>Coping skills<br/>Intervention: significant improvements in confrontive, escape and avoidance, planful problem solving and positive reappraisal, that were higher than those in control for planful problem solving.</p> <p>Disease activity<br/>No significant intergroup and intragroup differences in SLEDAI scores.</p> <p>SLE-SSc<br/>Significant reductions in intervention group, that were higher than in the control group.</p> <p>HRQoL<br/>Significant reductions in intervention group, that were higher than in the control group for Occupational activity, Symptoms, Treatment, Humor and Self-image.</p> | Anxiety/Depression: Yes<br>Coping skills: Yes<br>Disease activity: Yes/No<br>HRQoL: Yes | 11; I  | Conceição, 2019 [71] |
| <p>P: Attend 10 Cognitive-Behaviour Therapy sessions</p> <p>C: N/A</p>                                            | N/A                | 2 studies: 2 RCTs               | <p>HRQoL<br/>CBT groups: significant improvement in HRQoL (mean difference: = -17.7, 95%CI: (-26.7, -8.63), p&lt;0.001).<br/>*Not clear what was the outcome measure.</p>                                                                                                                                                                                                                                                                                                                                                                                                                                                                                                                                                                                                                                                                                                                                                                                                                                                                                          | HRQoL: Yes                                                                              | 12; R  | da Hora, 2019 [26]   |



| Intervention/management strategy                                                                         | Comparator                      | N                               | Results                                                                                                                                                                                                                                                                                                                                                                                             | Efficacy                                                                                             | SD&OA* | Reference           |
|----------------------------------------------------------------------------------------------------------|---------------------------------|---------------------------------|-----------------------------------------------------------------------------------------------------------------------------------------------------------------------------------------------------------------------------------------------------------------------------------------------------------------------------------------------------------------------------------------------------|------------------------------------------------------------------------------------------------------|--------|---------------------|
| P: Attend a mindfulness-based cognitive therapy + homework<br>C: N/A: intraindividual assessment         | N/A; intraindividual assessment | Intervention: 25<br>Control: -  | Depression<br>Pre: 24.6 ± 11.2<br>Post: 17.4 ± 13.0 (p<0.01)<br><br>Anxiety<br>Pre: 18.2 ± 9.5<br>Post: 13.4 ± 7.7 (p=0.04)<br><br>Satisfaction with life<br>Pre: 13.9 ± 6.4<br>Post: 15.4 ± 8.3 (p=0.48)<br><br>Stress<br>Pre: 20.4 ± 3.2<br>Post: 17.9 ± 4.6 (p=0.04)<br><br>Disease activity<br>No improvement                                                                                   | Depression: Yes<br>Anxiety: Yes<br>Satisfaction with life: No<br>Stress: Yes<br>Disease activity: No | 10; I  | Kim, 2019 [72]      |
| P: Eight Sessions of Acceptance and Commitment Therapy (ACT)<br>C: Usual care                            | Other SLE patients              | Intervention: 12<br>Control: 12 | Disappointment<br>Intervention<br>Pre: 7.72 (56.50)<br>Post: 5.28 (36.50)<br>CG<br>Pre: 4.33 (53.75)<br>Post 5.33 (57.83)<br><br>Psychological distress<br>Intervention<br>Pre: 3.27 (26.75)<br>Post: 5.33 (9.42)<br>CG<br>Pre: 2.44 (29.17)<br>Post: 4.33 (29)<br><br>Psychasthenia<br>Intervention<br>Pre: 11.27 (49.17)<br>Post: 8.32 (19.43)<br>CG<br>Pre: 11.14 (45.25)<br>Post: 11.14 (44.25) | Disappointment: Yes<br>Psychological distress: Yes<br>Psychasthenia: Yes                             | 10; I  | Sahebari, 2019 [73] |
| P: Receive psychoeducational interventions<br>C: Health education, and nontargeted psychological comfort | Other SLE patients              | Intervention: 42<br>Control: 43 | Quality of Life<br>Increase of all four domains of the WHOQOL-BREF at 3 months (p<0:05)<br><br>Depression<br>Reduced, p<0.05<br><br>Anxiety<br>Reduced, p<0.05                                                                                                                                                                                                                                      | Quality of Life: Yes<br>Depression: Yes<br>Anxiety: Yes                                              | 11; W  | Xu, 2021 [74]       |
| <b>Dietary therapy and nutrition</b>                                                                     |                                 |                                 |                                                                                                                                                                                                                                                                                                                                                                                                     |                                                                                                      |        |                     |

| Intervention/management strategy                                                                                                                                                                                                                                  | Comparator         | N                             | Results                                                                                                                                                                                                                                                                                                                                                                                                                                                                                                                                                                                                                                                                                                                                                                                                                                                                                                                                                                                                                                                                                                                                                                                                                                                                           | Efficacy                                                                                                       | SD&OA* | Reference       |
|-------------------------------------------------------------------------------------------------------------------------------------------------------------------------------------------------------------------------------------------------------------------|--------------------|-------------------------------|-----------------------------------------------------------------------------------------------------------------------------------------------------------------------------------------------------------------------------------------------------------------------------------------------------------------------------------------------------------------------------------------------------------------------------------------------------------------------------------------------------------------------------------------------------------------------------------------------------------------------------------------------------------------------------------------------------------------------------------------------------------------------------------------------------------------------------------------------------------------------------------------------------------------------------------------------------------------------------------------------------------------------------------------------------------------------------------------------------------------------------------------------------------------------------------------------------------------------------------------------------------------------------------|----------------------------------------------------------------------------------------------------------------|--------|-----------------|
| <p>P: NCEP Step 2 diet: 30% or less calories from fat (7% from saturated fat, 13% from monounsaturated fat, and 10% from polyunsaturated fat), and &lt; 200 mg of cholesterol per day + maintain their usual level of physical activity.</p> <p>C: Usual care</p> | Other SLE patients | Intervention: 8<br>Control: 8 | <p>Body composition (body weight)<br/>Diet group: w0: 79.4 (8.4)<br/>w12: 75.7 (7.4)<br/>Control group: 86.2 (24.5)<br/>w12: 81.5 (20.3)<br/>P intragroup: 0.006<br/>P intergroup: 0.50</p> <p>HRQoL (VAS)<br/>Diet group: w0: 59.4 (7.8)<br/>w12: 68.4 (7.8)<br/>Control group: 56.3 (15.1)<br/>w12: 53.8 (18.2)<br/>P intragroup: 0.01<br/>P intergroup: 0.05</p> <p>Lipid profile<br/>Total cholesterol<br/>Diet group: w0: 222.4 (24.3)<br/>w12: 210.1 (25.4)<br/>Control group: 199.3 (49.4)<br/>w12: 194.3 (24.1)<br/>P intragroup: 0.01<br/>P intergroup: 0.40</p> <p>LDLc<br/>Diet group: w0: 136.4 (23.7)<br/>w12: 134 (20.6)<br/>Control group: 125.3 (36.9)<br/>w12: 119.1 (26.8)<br/>P intragroup: 0.80<br/>P intergroup: 0.60</p> <p>HDLc<br/>Diet group: w0: 55.6 (17.4)<br/>w12: 53.3 (15.9)<br/>Control group: 44.0 (10.8)<br/>w12: 49.4 (11.6)<br/>P intragroup: 0.09<br/>P intergroup: 0.04</p> <p>TG<br/>Diet group: w0: 151.6 (85.2)<br/>w12: 114.6 (30.2)<br/>Control group: 150.8 (62.2)<br/>w12: 128.0 (43.8)<br/>P intragroup: 0.80<br/>P intergroup: 0.20</p> <p>Nutrient intake<br/>Diet group: greater reductions in nutrient intake compared to control group in percentage calories from total fat, SFA, MUFA, and PUFA, and dietary cholesterol</p> | <p>Body composition (body weight): Yes<br/>HRQoL (VAS): Yes<br/>Lipid profile: No<br/>Nutrient intake: Yes</p> | 11; W  | Shah, 2002 [75] |

| Intervention/management strategy                                                                                                                       | Comparator         | N                               | Results                                                                                                                                                                                                                                                                                                                                                                                                                                                                          | Efficacy                                                | SD&OA* | Reference         |
|--------------------------------------------------------------------------------------------------------------------------------------------------------|--------------------|---------------------------------|----------------------------------------------------------------------------------------------------------------------------------------------------------------------------------------------------------------------------------------------------------------------------------------------------------------------------------------------------------------------------------------------------------------------------------------------------------------------------------|---------------------------------------------------------|--------|-------------------|
| <p>P: No intervention.</p> <p>Dietary nutrients estimated by a semiquantitative food frequency questionnaire</p> <p>C: No</p>                          | Other SLE patients | Intervention: 7<br>Control: 189 | <p>Disease activity</p> <p>High intake of Vitamin C associated with less active disease (RR: 0.26 95%CI: (0.1–0.67), p=0.005).</p> <p>No significant associations for other nutrients.</p> <p>Cardiovascular risk</p> <p>Higher intake of vegetable fat was found among patients who developed a vascular event versus those who did not (35.9 versus 30.4 g/day p=0.04).</p> <p>No significant differences for other nutrients.</p>                                             | Disease activity: Yes/No<br>Cardiovascular risk: Yes/No | 5; R   | Minami, 2003 [76] |
| <p>P: 1° group: 3g MaxEPA+ 3mg copper</p> <p>2° group: 3g MaxEPA + placebo copper</p> <p>3° group: 3 mg copper+ placebo oil fish</p> <p>C: Placebo</p> | Other SLE patients | Intervention: 40<br>Control: 12 | <p>Body composition</p> <p>No significant changes from baseline in BMI in any of the groups.</p> <p>Disease activity</p> <p>SLAM-R</p> <p>Fish oil: w0: 6.12 w24: 4.69 p&lt;0.05</p> <p>No fish oil: no significant change from baseline.</p> <p>Copper: no significant change from baseline.</p> <p>Patient-reported improvement</p> <p>Fish oil and copper: Improvement: 6/13 No changes: 7/13.</p> <p>Placebo: Improvement 1/13 No changes: 9/13 Worsening: 3/13. p=0.027</p> | Body composition: No<br>Disease activity: Yes           | 11; W  | Duffy, 2004 [77]  |

| Intervention/management strategy                                                                                                                                                                                                                                                                                                                                                          | Comparator         | N                                 | Results                                                                                                                                                                                                                                                                                                                                                                                                                                                                                                                                                                                                                                                                                                            | Efficacy                                                                                | SD&OA* | Reference           |
|-------------------------------------------------------------------------------------------------------------------------------------------------------------------------------------------------------------------------------------------------------------------------------------------------------------------------------------------------------------------------------------------|--------------------|-----------------------------------|--------------------------------------------------------------------------------------------------------------------------------------------------------------------------------------------------------------------------------------------------------------------------------------------------------------------------------------------------------------------------------------------------------------------------------------------------------------------------------------------------------------------------------------------------------------------------------------------------------------------------------------------------------------------------------------------------------------------|-----------------------------------------------------------------------------------------|--------|---------------------|
| <p>P: Counselling to follow the NCEP Step II diet: &lt; 30% of energy as fat and &lt; 7% as saturated fat, and &lt; 200 mg of cholesterol per day 21.</p> <p>Counselling to limit their intake of sodium (&lt; 2400 mg/day) and refined and added sugars and consume 2–3 servings of skim/low fat dairy foods and ≥ 5 servings of fruits and vegetables per day.</p> <p>C: Usual care</p> | Other SLE patients | Intervention: 8<br>Control: 7     | <p>Nutrient intake</p> <p>Energy intake<br/>Diet group: w0: 1693 (320)<br/>w12: 1145 (310)<br/>Control group: 1386 (509)<br/>w12: 1339 (465)<br/>P intragroup: 0.02<br/>P intergroup: 0.10</p> <p>Vitamin B12<br/>Diet group: w0: 2.8 (0.8)<br/>w12: 1.6 (1.1)<br/>Control group: 2.3 (0.9)<br/>w12: 2.6 (0.7)<br/>P intragroup: 0.02<br/>P intergroup: 0.05</p> <p>Sodium<br/>Diet group: w0: 2.7 (1.2)<br/>w12: 1.7 (0.7)<br/>Control group: 1.9 (0.6)<br/>w12: 1.9 (0.8)<br/>P intragroup: &lt;0.05<br/>P intergroup: 0.08</p> <p>Haemoglobin levels<br/>Diet group: w0: 12.4 (1.1)<br/>w12: 12.0 (1.1)<br/>Control group: 11.3 (1.8)<br/>w12: 10.9 (1.7)<br/>P intragroup: &gt;0.05<br/>P intergroup: 0.08</p> | Nutrient intake: Yes/No<br>Haemoglobin levels: No                                       | 11; W  | Shah, 2004 [78]     |
| <p>P: Assessing daily use of micronutrient supplements (MS) in SLE patients: Calcium, Vitamin D, Multivitamins (vitamin B6, folic acid, minerals iron, B12, C, E, magnesium, potassium).</p> <p>C: No</p>                                                                                                                                                                                 | Other SLE patients | Intervention: 137<br>Control: 122 | <p>Healthcare utilisation<br/>Compared with non-users, MS users frequently visited health-care professionals and used diagnostics tests.</p> <p>Disease activity<br/>No difference in SLEDAI-2K or SLAM between users and non-users.</p> <p>Lower SLAM in MS users (4.0 (0.4)) versus non-users (5.0 (0.3)) after excluding those taking calcium /vitamin D.</p> <p>HRQoL<br/>No differences between users and non-users in SF-36 PCS and MCS scores.</p> <p>Organ damage<br/>Higher SDI in MS users (1.6 (0.2)) versus non-users (1.2 (0.1)).p=0.02</p>                                                                                                                                                           | Healthcare utilisation: No<br>Disease activity: Yes/No<br>HRQoL: No<br>Organ damage: No | 1; I   | Aghdassi, 2010 [79] |

| Intervention/management strategy                                                                                                                                                                                                      | Comparator                      | N                               | Results                                                                                                                                                                                                                                                                                                                                                                    | Efficacy                                         | SD&OA* | Reference         |
|---------------------------------------------------------------------------------------------------------------------------------------------------------------------------------------------------------------------------------------|---------------------------------|---------------------------------|----------------------------------------------------------------------------------------------------------------------------------------------------------------------------------------------------------------------------------------------------------------------------------------------------------------------------------------------------------------------------|--------------------------------------------------|--------|-------------------|
| <p>P: No intervention.</p> <p>Dietary nutrients estimated by a semiquantitative food frequency questionnaire (Vitamin B6, Vitamin B12, folate, total dietary fibre, soluble dietary fibre, insoluble dietary fibre).</p> <p>C: No</p> | Other SLE patients              | Intervention: 216<br>Control: - | <p>Disease activity</p> <p>High intake of Vitamin B6 (HR: 0.41, 95%CI: 0.18–0.97, p=0.04), and total dietary fibre (HR: 0.29, 95%CI: (0.11, 0.78), p=0.01) associated with less active disease</p> <p>No significant associations for Vitamin B12 or folate</p> <p>Cardiovascular risk</p> <p>No significant associations between nutrient intake and vascular events.</p> | Disease activity: Yes<br>Cardiovascular risk: No | 5; R   | Minami, 2011 [80] |
| <p>P: Reduced calorie diet (1200/1500 kcal/d) [combined with increasing exercise from 100 to 300 min/w]</p> <p>C: N/A: intraindividual assessment</p>                                                                                 | N/A; intraindividual assessment | Intervention: 15<br>Control: -  | <p>Body composition</p> <p>BMI change: -3.04 (0.7)</p> <p>Body weight change (kg): -8.3 (2.0)</p> <p>Waist circumference change (cm): -10.8 (4.9)</p> <p>Physical activity</p> <p>Self-reported physical activity (minutes/session) +25.6.</p>                                                                                                                             | Body composition: Yes<br>Physical activity: Yes  | 10; W  | Otto, 2011 [6]    |

| Intervention/management strategy                                                                                                                                                | Comparator         | N                                 | Results                                                                                                                                                                                                                                                                                                                                                                                                                                                                                                                                                                                                                                                                                                                                                                                                                                                                                                                                                                                                   | Efficacy                                                                                                | SD&OA* | Reference         |
|---------------------------------------------------------------------------------------------------------------------------------------------------------------------------------|--------------------|-----------------------------------|-----------------------------------------------------------------------------------------------------------------------------------------------------------------------------------------------------------------------------------------------------------------------------------------------------------------------------------------------------------------------------------------------------------------------------------------------------------------------------------------------------------------------------------------------------------------------------------------------------------------------------------------------------------------------------------------------------------------------------------------------------------------------------------------------------------------------------------------------------------------------------------------------------------------------------------------------------------------------------------------------------------|---------------------------------------------------------------------------------------------------------|--------|-------------------|
| <p>P: Low GI diet whereby carbohydrate intake was limited to 45 g per day of low GI food, without restricting the consumption of fat and protein</p> <p>C: Low calorie diet</p> | Other SLE patients | Intervention: 11<br>Control: 12   | <p>Body composition</p> <p>Weight loss from baseline (kg)</p> <p>Low GI diet 3.9 (0.9)</p> <p>Low Cal diet 2.4 (2.2) p&lt;0.01</p> <p>P intragroup: &lt;0.001</p> <p>P intergroup: &gt; 0.05</p> <p>Disease activity</p> <p>SLEDAI</p> <p>Low GI diet: w0: 3.2 (5.1)</p> <p>w6: 2.8 (6.1)</p> <p>Low Cal diet: w0: 1.0 (1.2)</p> <p>w6: 1.0 (1.2)</p> <p>P intragroup: =0.03</p> <p>P intergroup: &gt;0.05</p> <p>ECLAM</p> <p>Low GI diet: w0: 1.7 (1.2)</p> <p>w6: 1.3 (1.4)</p> <p>Low Cal diet: w0: 1.8 (1.2)</p> <p>w6: 2.2 (1.1)</p> <p>P intragroup: =0.03</p> <p>P intergroup: &gt;0.05</p> <p>Fatigue</p> <p>FSS</p> <p>Low GI diet: w0: 4.9 (0.9)</p> <p>w6: 4.4(1.2)</p> <p>Low Cal diet: w0: 4.7(1.5)</p> <p>w6: 4.4(1.7)</p> <p>P intragroup: =0.03</p> <p>P intergroup: &gt;0.05</p> <p>Seep quality</p> <p>PSQI</p> <p>Low GI diet: w0: 9.3(5.2)</p> <p>w6: 6.7(4.3)</p> <p>Low Cal diet w0: 7.1(4.2)</p> <p>w6: 7.6 (4.7)</p> <p>P intragroup: &gt;0.05</p> <p>P intergroup: &gt;0.05</p> | <p>Body composition: Yes</p> <p>Disease activity: No</p> <p>Fatigue: Yes/No</p> <p>Seep quality: No</p> | 11; W  | Davies, 2012 [81] |
| <p>P: No intervention.</p> <p>Administration of food frequency questionnaire (FFQ) + study of fatty acid content and plaque occurrence</p> <p>C: No</p>                         | Other SLE patients | Intervention: 114<br>Control: 122 | <p>Cardiovascular risk</p> <p>Omega-3 (r = -0.20, p=0.049), EPA (r = -0.32, p=0.002) and DHA (r = -0.33, p=0.001) in adipose tissue correlated negatively with plaque presence, whereas Omega-6 (r = 0.22, p=0.027) and linoleic acid (r = 0.24, p=0.019) correlated positively.</p> <p>Disease activity</p> <p>EPA (r= -0.36, p&lt;0.001) and DHA (r= -0.33, p&lt;0.001) in adipose tissue correlated negatively with SLEDAI</p> <p>Organ damage</p> <p>Arachidonic acid in adipose tissue correlated positively with SDI (r= -0.20, p&lt;0.005).</p>                                                                                                                                                                                                                                                                                                                                                                                                                                                    | <p>Cardiovascular risk: Yes</p> <p>Disease activity: Yes</p> <p>Organ damage: Yes/No</p>                | 1; I   | Elkan, 2012 [82]  |

| Intervention/management strategy                                                                                                                                  | Comparator         | N                              | Results                                                                                                                                                                                                                                                                                                                                                                                                                                                                                                                                                                                                                                                                                                                                                                                                                                                                                                                                            | Efficacy                                           | SD&OA* | Reference             |
|-------------------------------------------------------------------------------------------------------------------------------------------------------------------|--------------------|--------------------------------|----------------------------------------------------------------------------------------------------------------------------------------------------------------------------------------------------------------------------------------------------------------------------------------------------------------------------------------------------------------------------------------------------------------------------------------------------------------------------------------------------------------------------------------------------------------------------------------------------------------------------------------------------------------------------------------------------------------------------------------------------------------------------------------------------------------------------------------------------------------------------------------------------------------------------------------------------|----------------------------------------------------|--------|-----------------------|
| <p>P: With each meal, each patient received 1 capsule for 3 months, containing 500 mg turmeric (22.1 mg was the active ingredient curcumin)</p> <p>C: Placebo</p> | Other SLE patients | Intervention: 12<br>Control:12 | <p>Renal function</p> <p>Proteinuria (mg/day)</p> <p>Turmeric: m0: 954.2 (836.6)<br/>m3: 260.9 (106.2).</p> <p>Placebo: m0: 527.7 (388.3)<br/>m3: 471.4 (292.3).</p> <p>P intragroup: 0.009<br/>P intergroup&gt;0.05</p> <p>Systolic blood pressure (mmHg)</p> <p>Turmeric: m0: 13.3 (2.3)<br/>m3: 12.4 (1.8).</p> <p>Placebo: m0: 12.5 (2.4)<br/>m3: 12.3 (1.5).</p> <p>P intragroup: 0.02<br/>P intergroup&gt;0.05</p> <p>Haematuria</p> <p>Significant decrease from baseline in RBC in the turmeric (p=0.02) but not in the placebo group.</p> <p>No significant differences in diastolic blood pressure, GFR, serum albumin.</p> <p>Inflammatory markers</p> <p>Turmeric:</p> <p>C4: m0: 17.0 (8.5)<br/>m3: 22.9 (9.0)<br/>p=0.02.</p> <p>No significant changes from baseline in C3 and anti-dsDNA levels.</p> <p>No significant differences between groups changes from baseline in C4, C4 and anti-dsDNA levels in the turmeric group.</p> | Renal function: Yes/No<br>Inflammatory markers: No | 11; I  | Khajehdehi, 2012 [83] |

| Intervention/management strategy                                                                                                                                                                                                                                                                 | Comparator         | N                               | Results                                                                                                                                                                                                                                                                                                                                                                                                                                                                                                                                                                                                                                         | Efficacy                                             | SD&OA* | Reference           |
|--------------------------------------------------------------------------------------------------------------------------------------------------------------------------------------------------------------------------------------------------------------------------------------------------|--------------------|---------------------------------|-------------------------------------------------------------------------------------------------------------------------------------------------------------------------------------------------------------------------------------------------------------------------------------------------------------------------------------------------------------------------------------------------------------------------------------------------------------------------------------------------------------------------------------------------------------------------------------------------------------------------------------------------|------------------------------------------------------|--------|---------------------|
| <p>P: CVD-PCP counselling program= Phase 1: assessment of CVD risk factor on patients</p> <p>Phase 2: education on cardiovascular diseases and discussion on prevention strategies. Followed by a patient-centred nutrition counselling to attend at least once a month</p> <p>C: Usual care</p> | Other SLE patients | Intervention: 41<br>Control: 30 | <p>Body composition</p> <p>Weight (kg): m0: 86.0 (20.2)<br/>m6: 84.3 (19.0)<br/>p=0.025.</p> <p>BMI: m0: 31.3 (7.4)<br/>m6: 30.9 (7.2)<br/>p=0.07.</p> <p>Waist circumference (cm):<br/>m0: 101.3 (15.1)<br/>m6: 102.3 (14.2)<br/>p=0.37.</p> <p>Nutrient intake</p> <p>Total calories: -164.7 kcal at month 6 (p=0.071)<br/>%. Calories from fat: -4.13% at month 6 (p=0.011)<br/>Sodium: -508.3 mg at month 6 (p=0.006)</p> <p>No differences in cholesterol, omega-3/6, fibre, sugar and folate levels. Changes in diet habits: richer in fruits and vegetables (O&lt;0.001), richer in fibre (O=0.011), low-cholesterol diet (p=0.034).</p> | Body composition: Yes/No<br>Nutrient intake: Yes/No  | 10; I  | Everett, 2015 [84]  |
| <p>P: 1000 mg of green tea extract</p> <p>C: Placebo</p>                                                                                                                                                                                                                                         | Other SLE patients | Intervention: 32<br>Control: 36 | <p>Disease activity (SLEDAI)</p> <p>Green tea extract: m0: 4.7 (3.3)<br/>m3: 2.8 (3.2)<br/>Placebo: m0: 3.2 (3.2)<br/>m3: 2.9 (3.2)<br/>P intragroup: 0.001<br/>P intergroup: 0.004.</p> <p>HRQoL (SF-36)</p> <p>Green tea extract: significant improvement from baseline in PF, RP, GH and VT. Higher improvements than placebo in PF, GH and VT.</p>                                                                                                                                                                                                                                                                                          | Disease activity (SLEDAI): Yes<br>HRQoL (SF-36): Yes | 11; I  | Shamekhi, 2017 [85] |
| <p>P: Health coaching (weekly calls to educate and implement changes based on data analysis)</p> <p>C: Usual care</p>                                                                                                                                                                            | Other SLE patients | Intervention: 20<br>Control: 20 | <p>Pain, Fatigue, HRQoL</p> <p>78% improved in the experimental group and 36% in the control group (p&lt;0.01)</p>                                                                                                                                                                                                                                                                                                                                                                                                                                                                                                                              | Pain, Fatigue, HRQoL: Yes                            | 11; W  | Rothman, 2018 [86]  |



| Intervention/management strategy                                                                                                                                                                                                                       | Comparator         | N                                | Results                                                                                                                                                                                                                                                                                                                                                                                                                                                                                                                                                                                                                                                                                                                                                                                                                                                                                                                                 | Efficacy                                                                                                              | SD&OA* | Reference                   |
|--------------------------------------------------------------------------------------------------------------------------------------------------------------------------------------------------------------------------------------------------------|--------------------|----------------------------------|-----------------------------------------------------------------------------------------------------------------------------------------------------------------------------------------------------------------------------------------------------------------------------------------------------------------------------------------------------------------------------------------------------------------------------------------------------------------------------------------------------------------------------------------------------------------------------------------------------------------------------------------------------------------------------------------------------------------------------------------------------------------------------------------------------------------------------------------------------------------------------------------------------------------------------------------|-----------------------------------------------------------------------------------------------------------------------|--------|-----------------------------|
| <p>P: No intervention.</p> <p>Good adherence (&gt;10 points to Med Diet (14-item questionnaire on food consumption frequency and habits)</p> <p>C: No</p>                                                                                              | Other SLE patients | Intervention: 143<br>Control: 16 | <p>Body composition</p> <p>Patients with high adherence had lower frequency of obesity than patients with low adherence (20.7% versus 37.5%<br/>p=0.026), a lower mean BMI (25.9 [5.4] versus 31.5 [7.9], p=0.001) and lower fat mass BMI (32.8 [9.0] versus 38.5 [7.9], p=0.002)</p> <p>Cardiovascular risk</p> <p>Inverse relationship between Med Diet score and hsCRP: delta= -0.055, 95%CI: (-0.108, -0.003), p=0.039</p> <p>No significant relationship with homocysteine levels.</p> <p>Patients with high adherence had lower concentrations of TG than patients with low adherence, but there were no differences in total/HDL/LDL cholesterol.</p> <p>Disease activity</p> <p>Inverse relationship between Med Diet score and SLEDAI: beta= -0.380, 95%CI: (-0.464, -0.296), p&lt;0.001</p> <p>Organ damage</p> <p>Inverse relationship between Med Diet score and SDI: beta= -0.740, 95%CI: (-0.938, -0.542), p&lt;0.001</p> | <p>Body composition: Yes</p> <p>Cardiovascular risk: Yes/No</p> <p>Disease activity: Yes</p> <p>Organ damage: Yes</p> | 1; R   | Pocovi-Gerardino, 2021 [87] |
| <b>Complementary and alternative medicine</b>                                                                                                                                                                                                          |                    |                                  |                                                                                                                                                                                                                                                                                                                                                                                                                                                                                                                                                                                                                                                                                                                                                                                                                                                                                                                                         |                                                                                                                       |        |                             |
| <p>P: Administration of Traditional Chinese Medicine (cicimifuga rhizome 9g + oldenlandia herb 18 h, southernwood 15 g, red peony root 12 g + moutan bark 12 g+ rehmannia root 15 g+ turtle shell 12g etc)</p> <p>C: Usual care (Western medicine)</p> | Other SLE patients | Intervention: 85<br>Control: 85  | <p>Lipid profile</p> <p>Total cholesterol</p> <p>IM group: m0: 2.1(0.1)<br/>m24: 2.2 (0.1)</p> <p>WM group: m0: 2.0 (0.1)<br/>m24: 3.0 (0.2)</p> <p>P intragroup: &gt;0.05</p> <p>P intergroup: &lt;0.01</p> <p>TG</p> <p>IM group: m0: 4.0 (0.1)<br/>m24: 4.2 (0.1)</p> <p>WM group: m0: 4.0 (0.1)<br/>m24: 5.7 (0.2)</p> <p>P intragroup: &gt;0.05</p> <p>P intergroup: &lt;0.01</p> <p>Lipoproteins</p> <p>IM group: no significant changes from baseline in HDL/LDL/VLDL c and APoA. Lower levels of LDL and VLDLc and higher levels of HDLc compared with WM.</p>                                                                                                                                                                                                                                                                                                                                                                  | Lipid profile: Yes/No                                                                                                 | 11; W  | Wen, 2007 [88]              |

| Intervention/management strategy                                                           | Comparator         | N                                | Results                                                                                                                                                                                                                                                                                                                                                                                                                                                                                                                                                                                                                                                                                                | Efficacy                                                                              | SD&OA* | Reference                   |
|--------------------------------------------------------------------------------------------|--------------------|----------------------------------|--------------------------------------------------------------------------------------------------------------------------------------------------------------------------------------------------------------------------------------------------------------------------------------------------------------------------------------------------------------------------------------------------------------------------------------------------------------------------------------------------------------------------------------------------------------------------------------------------------------------------------------------------------------------------------------------------------|---------------------------------------------------------------------------------------|--------|-----------------------------|
| <p>P: Acupuncture (modified Feng 1985 protocol)</p> <p>C: Minimal needling, usual care</p> | Other SLE patients | Intervention: 103<br>Control: 89 | <p>Fatigue<br/>No significant differences across groups in post-pre scores in fatigue</p> <p>Pain<br/>No significant differences across groups in post-pre scores in pain</p> <p>Disease activity<br/>SLEDAI mean change<br/>AC: 1.9(7.2)<br/>MN: 1.6(4.1)<br/>UC: 0.75(8.3)<br/>P value AC vs MN: 0.05<br/>AC vs UC: 0.12</p> <p>SLAM-R mean change<br/>AC: 0.63(4.6)<br/>MN: -0.57(3.9)<br/>UC: -0.63(6.7)<br/>P value AC vs MN: 0.22<br/>AC vs UC: 0.28</p> <p>PGA mean change<br/>AC: 0.0(14.8)<br/>MN: -1.4(5.6)<br/>UC: 0.38(11.1)<br/>P value AC vs MN: 0.03<br/>AC vs UC: 0.13</p> <p>Inflammatory markers<br/>No significant differences across groups in post-pre-IL-1B and IL-6 levels.</p> | <p>Fatigue: No<br/>Pain: No<br/>Disease activity: No<br/>Inflammatory markers: No</p> | 11; I  | Greco, 2008 [89]            |
| <p>P: Being CAT (complementary and alternative therapies) users</p> <p>C: No</p>           | Other SLE patients | Intervention:<br>Control:        | <p>Quality of life<br/>CAT users: significantly reduced PF, BP and SF compared with CAT non-users.</p> <p>Organ damage<br/>CAT users: 1.20 (0.97)<br/>CAT non-users: 0.57 (0.98)<br/>P value: 0.01</p>                                                                                                                                                                                                                                                                                                                                                                                                                                                                                                 | <p>Quality of life: No<br/>Organ damage: No</p>                                       | 1; R   | Alvarez-Nemegyei, 2009 [90] |

| Intervention/management strategy                                                                                                       | Comparator         | N                               | Results                                                                                                                                                                                                                                                                                                                                                                                                                                                                                                                                                                                                  | Efficacy                                                                   | SD&OA* | Reference        |
|----------------------------------------------------------------------------------------------------------------------------------------|--------------------|---------------------------------|----------------------------------------------------------------------------------------------------------------------------------------------------------------------------------------------------------------------------------------------------------------------------------------------------------------------------------------------------------------------------------------------------------------------------------------------------------------------------------------------------------------------------------------------------------------------------------------------------------|----------------------------------------------------------------------------|--------|------------------|
| <p>P: Traditional Chinese Medicine: Dan-Chi-Liu-Wei combination (granules)</p> <p>C: Usual care + 10% Traditional Chinese medicine</p> | Other SLE patients | Intervention:<br>Control:       | <p>Disease flares<br/>TCM: 2/23 (8.6%), 0 severe<br/>C: 3/23 (13%) 1 severe. P intergroup&gt;0.05</p> <p>Disease activity<br/>SLEDAI:<br/>TCM: m0: 4.3 (2.3)<br/>m6: 3.5 (1.1)<br/>p=0.083 Control: m0: 3.7 (2.2)<br/>m6: 3.3 (3)<br/>p=0.867</p> <p>Inflammatory markers<br/>C3 and anti-dsDNA: no change after 6 months in TCM or control group.</p> <p>C4:<br/>TCM: m0: 14.7 (5.6)<br/>m6: 26 (8.6)<br/>p&lt;0.01<br/>Control: m0: 15.7 (8.3)<br/>m6: 24.7 (10.7)<br/>p&lt;0.01</p>                                                                                                                   | Disease flares: No<br>Disease activity: No<br>Inflammatory markers: Yes/No | 11; I  | Liao, 2011 [91]  |
| <p>P: Zi Shen Qing (combination of 6 herbs)</p> <p>C: Hydroxychloroquine 100 mg/12h PO</p>                                             | Other SLE patients | Intervention: 42<br>Control: 42 | <p>Disease activity<br/>SLEDAI<br/>Active group: w0: 10.5 (2.2)<br/>w12: 5.1 (1.5)<br/>Control: w0: 10 (2.1)<br/>w12: 7.0 (1.9)<br/>P intragroup&lt;0.01<br/>P intergroup: 0.03</p> <p>Mean prednisone dose<br/>Active group: w0: 10.2 (3.6)<br/>w12: 3.6 (3.1)<br/>Control: w0: 11.1 (6.6)<br/>w12: 6.6 (5.6)<br/>P intragroup&lt;0.01<br/>P intergroup: 0.01</p> <p>Inflammatory markers<br/>Active group: reduction in anti-dsDNA and IgG levels increase in C3, C4, NK cell activity from baseline.<br/>Reductions in anti-ds DNA and increases in C3/C4 were greater than in the control group.</p> | Disease activity: Yes<br>Inflammatory markers: Yes                         | 11; I  | Linda, 2013 [92] |
| <b>Photoprotection</b>                                                                                                                 |                    |                                 |                                                                                                                                                                                                                                                                                                                                                                                                                                                                                                                                                                                                          |                                                                            |        |                  |

| Intervention/management strategy                                                                                                                                                                                                                                                                                                                                                                                                 | Comparator                      | N                              | Results                                                                                                                                                                                                                                                                                                                      | Efficacy                                           | SD&OA* | Reference            |
|----------------------------------------------------------------------------------------------------------------------------------------------------------------------------------------------------------------------------------------------------------------------------------------------------------------------------------------------------------------------------------------------------------------------------------|---------------------------------|--------------------------------|------------------------------------------------------------------------------------------------------------------------------------------------------------------------------------------------------------------------------------------------------------------------------------------------------------------------------|----------------------------------------------------|--------|----------------------|
| <p>P: 3 different sunscreens:</p> <p>Sunscreen A: UVB: Octocrylene. UVA: Mexoryl SX, Mexoryl XL, Parsol 1789. TiO<sub>2</sub>, SPF &gt;60</p> <p>Sunscreen B: (UVB: Eusolex 6300, Parsol MCX, Uvinul T150, Neohelipan. UVA: Parsol 1789. TiO<sub>2</sub>, SPF &gt;75</p> <p>Sunscreen C: (Eusolex 6300, Parsol MCX, Uvinul T150</p> <p>UVA: Parsol 1789. TiO<sub>2</sub>) SPF= 35]</p> <p>C: N/A: intraindividual assessment</p> | N/A; intraindividual assessment | Intervention: 11<br>Control: - | <p>Photoprotection</p> <p>Complete Photoprotection Sunscreen A in 11 out of 11 patients<br/>Sunscreen B in 5 out of 11 patients<br/>Sunscreen C in 3 out of 11 patients</p> <p>Expression of keratinocyte ICAM-1 mRNA</p> <p>Increased in unprotected irradiated skin area not increased in area treated by sunscreen A</p>  | Photoprotection<br>: Yes                           | 10; R  | Stege, 2000 [93]     |
| <p>P: 2 mg/cm<sup>2</sup> sunscreen Anthelios W30 La Roche-Posay (parsol 1789, uvinul N539, uvinul T150, mexoryl XL, titanium dioxide)</p> <p>C: N/A: intraindividual assessment</p>                                                                                                                                                                                                                                             | N/A; intraindividual assessment | Intervention: 66<br>Control: - | <p>Photoprotection</p> <p>Patients with photosensitivity who were treated with sunscreen developed:<br/>LE lesion: 2 (4)<br/>No reaction: 26 (47)<br/>Pigmentation only: 25 (49)</p>                                                                                                                                         | Photoprotection<br>: Yes                           | 5; W   | Herzinger, 2004 [94] |
| <p>P: 9-week course of low-dose UVA1 phototherapy</p> <p>C: N/A: intraindividual assessment</p>                                                                                                                                                                                                                                                                                                                                  | N/A; intraindividual assessment | Intervention: 9<br>Control: -  | <p>Disease activity SLEDAI<br/>Pre: 7.2 (5.6)<br/>post: 0.9 (1.8)<br/>p=0.005</p> <p>Manifestations<br/>Reduction in skin rash<br/>no significant changes in other manifestations.</p> <p>Inflammatory markers<br/>Reduction in Th2, Th1/Th2 ratio, Tc1, IFN-gamma producing CD8+ cells.<br/>Increase in IL4+/D4+ cells.</p> | Disease activity: Yes<br>Inflammatory markers: Yes | 10; I  | Szegedi, 2005 [95]   |

| Intervention/management strategy                                                                                                        | Comparator                                   | N                                | Results                                                                                                                                                                                                                                                                                                                                                                                             | Efficacy                                                                     | SD&OA* | Reference                |
|-----------------------------------------------------------------------------------------------------------------------------------------|----------------------------------------------|----------------------------------|-----------------------------------------------------------------------------------------------------------------------------------------------------------------------------------------------------------------------------------------------------------------------------------------------------------------------------------------------------------------------------------------------------|------------------------------------------------------------------------------|--------|--------------------------|
| P: Broad-spectrum liposomal sunscreen 20 min prior to a combined standardized UVA/UVB irradiation<br>C: Unprotected skin, sunscreen use | Healthy controls, intraindividual assessment | Intervention: 20<br>Control: 10  | Inflammatory markers<br>MxA: sunscreen reduced MxA positive cells compared with unprotected skin.<br>Immune cells: sunscreen reduced the number of CD11c (DC), CD23 (pDC) and CD68 (macrophages) cells compared with unprotected skin.                                                                                                                                                              | Inflammatory markers: Yes                                                    | 10; I  | Zahn, 2014 [96]          |
| P: Photoprotection awareness<br>C: No                                                                                                   | Other SLE patients                           | Intervention: 205<br>Control: 17 | Disease activity<br>SLEDAI<br>Aware: 2.0 (4)<br>unaware: 2.0 (3)<br>p=0.41<br>Organ damage<br>SDI<br>Aware: 1.0 (2)<br>unaware: 1.0 (2)<br>p=0.81<br>Inflammatory markers<br>No differences in ANA, Ro/La and anti-DSDNA positivity, and in C3/C4 levels.                                                                                                                                           | Disease activity: No<br>Organ damage: No<br>Inflammatory markers: No         | 1; I   | Abdul Kadir, 2018 [97]   |
| <b>Healthcare models</b>                                                                                                                |                                              |                                  |                                                                                                                                                                                                                                                                                                                                                                                                     |                                                                              |        |                          |
| P: Analysis (coding) of active patient-physician communication from audiotaped routine visits<br>C: N/A: intraindividual assessment     | N/A; intraindividual assessment              | Intervention: 79<br>Control: -   | Disease activity<br>No associations between SLAM or SLEDAI score and patient participation score (p>0.20 for all)<br>Functional disability<br>No associations between HAQ score and patient participation score (p=0.20)<br>Organ damage<br>Patient participation was associated with lower SDI scores (OR: 0.93, 95%CI: (0.91–0.94), p<0.001), but not with reductions in SDI progression (p=0.13) | Disease activity: No<br>Functional disability: No<br>Organ damage: Yes       | 10; I  | Ward, 2003 [98]          |
| P: Application of the continuous care model (CCM) [Orientation, sensitization, control]<br>C: N/A: intraindividual assessment           | N/A; intraindividual assessment              | Intervention: 34<br>Control: -   | Knowledge (about SLE-related healthcare issues)<br>Baseline: 3.0 (5.3)<br>3 months: 26.9 (14.2) [improved]<br>Quality of life<br>SF-36<br>Improvements in PF, RP, GH, VT, RE, and MH (p<.001)                                                                                                                                                                                                       | Knowledge (about SLE-related healthcare issues): Yes<br>Quality of life: Yes | 10; I  | Sahebalzamani, 2017 [99] |

| Intervention/management strategy                                                                                                                                                                     | Comparator         | N                               | Results                                                                                                                                                                                                                                                                                                                                                                                                                                                                                                                                                                                                                                                                                    | Efficacy                                                                                                                                                    | SD&OA* | Reference         |
|------------------------------------------------------------------------------------------------------------------------------------------------------------------------------------------------------|--------------------|---------------------------------|--------------------------------------------------------------------------------------------------------------------------------------------------------------------------------------------------------------------------------------------------------------------------------------------------------------------------------------------------------------------------------------------------------------------------------------------------------------------------------------------------------------------------------------------------------------------------------------------------------------------------------------------------------------------------------------------|-------------------------------------------------------------------------------------------------------------------------------------------------------------|--------|-------------------|
| <p>P: Transitional care plan (structural assessments and corresponding interventions based on the Omaha System) + telephone follow up 2, 3, 6, and 10 weeks after discharge</p> <p>C: Usual care</p> | Other SLE patients | Intervention: 64<br>Control: 61 | <p>Quality of life</p> <p>SF-36 MCS<br/>TC pre-test: 45.4 (14.3)<br/>post-test: 61.1 (9.1)<br/>Control pre-test: 49.8 (13.1)<br/>post-test: 57.4 (9.3)<br/>p=0.001</p> <p>SF-36 PCS<br/>TC pre-test: 48.8 (12.4)<br/>post-test: 63.7 (10.9)<br/>Control pre-test: 50.0 (11.9)<br/>post-test: 60.5 (12.3)<br/>p=0.046</p> <p>Self-care<br/>TC pre-test: 92.9 (10.8)<br/>post-test: 112.9 (6.8)<br/>Control pre-test: 95.7 (9.6)<br/>post-test: 100.9 (8.5)<br/>p&lt;0.001</p> <p>Readmission rate 30 day<br/>TC: 3 (4.7)<br/>Control: 13 (21.3)<br/>P: 0.005</p>                                                                                                                            | Quality of life: Yes<br>Self-care: Yes<br>Readmission rate 30 day: Yes                                                                                      | 11; I  | Xie, 2018 [100]   |
| <p>P: Multidisciplinary care (from a physician, pharmacist, and nurse) in addition to routine clinical follow up</p> <p>C: Usual care</p>                                                            | Other SLE patients | Intervention: 42<br>Control: 40 | <p>Disease activity<br/>SLEDAI-2K<br/>Intervention: 0<br/>control group: 2<br/>p=0.027</p> <p>Patient satisfaction<br/>Intervention: 92.9%<br/>Control group: 0%<br/>p=0.000</p> <p>Quality of life<br/>Improvements (0.94 vs. 0.85)<br/>p=0.006</p> <p>Medication adherence<br/>Control group: baseline:55 (51.8, 64)<br/>end 59 (53, 63.3)<br/>Intervention: baseline56.5 (52.3,63.8)<br/>end: 55 (51, 65)</p> <p>Belief about medicines<br/>Control group: baseline: 2.5(0,6.3)<br/>end: 3(1.8, 5)<br/>Intervention: baseline: 2 (0,6.8)<br/>end: 3 (0,7)</p> <p>Organ damage<br/>Control group: baseline:1 (0, 1.3)<br/>end: 0.5<br/>Intervention group: (0, 2.3)<br/>end 0 (0, 1)</p> | Disease activity: Yes<br>Patient satisfaction: Yes<br>Quality of life: Yes<br>Medication adherence: Yes<br>Belief about medicines: Yes<br>Organ damage: Yes | 11; W  | Zhang, 2019 [101] |
| <b>Laser treatment</b>                                                                                                                                                                               |                    |                                 |                                                                                                                                                                                                                                                                                                                                                                                                                                                                                                                                                                                                                                                                                            |                                                                                                                                                             |        |                   |

| Intervention/management strategy                                                                                                                                                   | Comparator                      | N                               | Results                                                                                                                                                                                                                                                                                                                                                        | Efficacy                                                             | SD&OA* | Reference              |
|------------------------------------------------------------------------------------------------------------------------------------------------------------------------------------|---------------------------------|---------------------------------|----------------------------------------------------------------------------------------------------------------------------------------------------------------------------------------------------------------------------------------------------------------------------------------------------------------------------------------------------------------|----------------------------------------------------------------------|--------|------------------------|
| P: Treatment with pulsed dye laser (PDL) on discoid lesions<br>C: N/A: intraindividual assessment                                                                                  | N/A; intraindividual assessment | Intervention: 12<br>Control: -  | Pain<br>VAS (0–10): 2.4 (0.5)<br><br>Disease activity<br>CLASI activity<br>W0: 4.4 (0.2)<br>w6: 1.3 (0.3)<br>p<0.001<br><br>Patient satisfaction<br>VAS (0–10): 6.9 (0.5)                                                                                                                                                                                      | Pain: N/A<br>Disease activity: Yes<br>Patient satisfaction: N/A      | 10; R  | Erceg, 2009 [102]      |
| P: Treatment with pulsed dye laser (PDL) on discoid lesions<br>C: N/A: intraindividual assessment                                                                                  | N/A; intraindividual assessment | Intervention: 9<br>Control: -   | Disease activity (cutaneous)<br>Erythema index change<br>PDL: -16.6%<br>Control: -9.8%<br>p<0.05<br><br>Texture index change<br>PDL: -14.6%<br>Control: -5.9%<br>p<0.05<br><br>mCLASI<br>PDL: -36.7%<br>Control: -33.3%<br>p>0.05<br><br>Inflammatory markers<br>Non-significant reduction in CXCL-9, 10, IFN-c, IL-1b, TNF-a, TGF-b, CD3, CD4, CD8 and CXCR3. | Disease activity (cutaneous):<br>Yes<br>Inflammatory markers: No     | 10; I  | Rerknimitr, 2019 [103] |
| <b>Social support</b>                                                                                                                                                              |                                 |                                 |                                                                                                                                                                                                                                                                                                                                                                |                                                                      |        |                        |
| P: Attend support group<br>C: No                                                                                                                                                   | Other SLE patients              | Intervention: 34<br>Control: 71 | HRQoL<br>Adjusted MCS<br>Support group: 31.5 (1.9)<br>No support group: 39.8 (1.3)<br>p<0.05<br><br>Adjusted PCS<br>Support group: 38.0 (1.6)<br>No support group: 39.8 (1.1)<br>p>0.05                                                                                                                                                                        | HRQoL: Yes/No                                                        | 1; R   | Dorsey, 2004 [104]     |
| P: No intervention (exposure to illness uncertainty, social support, coping modes through questionnaires)-being hospitalized for over a week<br>C: N/A: intraindividual assessment | N/A; intraindividual assessment | Intervention: 200<br>Control: - | Illness uncertainty<br>Mean: 97.60 ± 11.24<br><br>Social support<br>Illness uncertainty negatively correlated with support availability (r = -0.161)<br><br>Coping modes<br>Illness uncertainty positively correlated with the yielding coping mode (r = 0.249)                                                                                                | Illness uncertainty: Yes<br>Social support: Yes<br>Coping modes: Yes | 1; R   | Li, 2019 [105]         |
| <b>Others</b>                                                                                                                                                                      |                                 |                                 |                                                                                                                                                                                                                                                                                                                                                                |                                                                      |        |                        |

| Intervention/management strategy                                                                     | Comparator         | N                               | Results                                                                                                                                                                                                                                                                                                                                                                                                                                                                                                                                                                                                                                                    | Efficacy                                             | SD&OA* | Reference              |
|------------------------------------------------------------------------------------------------------|--------------------|---------------------------------|------------------------------------------------------------------------------------------------------------------------------------------------------------------------------------------------------------------------------------------------------------------------------------------------------------------------------------------------------------------------------------------------------------------------------------------------------------------------------------------------------------------------------------------------------------------------------------------------------------------------------------------------------------|------------------------------------------------------|--------|------------------------|
| <p>P: Meditation instruction + meditation practice</p> <p>C: Usual care</p>                          | Other SLE patients | Intervention: 15<br>Control: 15 | <p>Sympathetic activity<br/>Serum normetanephrine level decreased in meditation and control groups, not statically significant.</p> <p>Heart rate:<br/>Meditation: 78.5 (4.7)<br/>Control: 82.2 (4.2)<br/>p=0.03</p> <p>Heart rate variability [measured only in intervention group]<br/>Improvement in time and frequency domains.</p> <p>Quality of life<br/>SF-36 PCS<br/>Meditation: m0: 21.4(5.0-50-2)<br/>m6 62.2 (51.8-88.4)<br/>Control: m0: 19.4 (10.4-49.2)<br/>m6: 55.4 (36.4-83.4). p=0.04</p> <p>SF-36 MCS<br/>Meditation: m0: 16.9 (4.4-46.0)<br/>m6 72.4 (45.1-81.6)<br/>Control: m0: 13.9 (7.7-44.2)<br/>m6: 45 (29.8-77.6). p&lt;0.01</p> | Sympathetic activity: Yes/No<br>Quality of life: Yes | 10; I  | Bantornwan, 2014 [106] |
| <p>P: Completing a Home Cleaning and Maintenance Product list (HCMPL) questionnaire</p> <p>C: No</p> | Other SLE patients | Intervention: 80<br>Control: 41 | <p>Disease flares<br/>Bath oil use (IRR 1.008, 95%CI: (1.00, 1.02)) = significant association with increased SRF day relative risk (IRR).<br/>Cleansing beauty (IRR 0.999, 95%CI: (0.998, 0.999))<br/>make-up (IRR 0.998, 95% : (0.997, 0.999))<br/>adhesives (IRR 0.994, 95%CI: (0.991, 0.997))<br/>paint (IRR 0.99, 95%CI: (0.986, 0.995)) = paradoxical "protective" effects (reduced SRF days)</p>                                                                                                                                                                                                                                                     | Disease flares: Yes                                  | 2; I   | Squance, 2015 [107]    |



| Intervention/management strategy                                                                                                         | Comparator         | N                                | Results                                                                                                                                                                                                                                                                                                                                                                                                                                                                                                                                                                     | Efficacy                                                         | SD&OA* | Reference             |
|------------------------------------------------------------------------------------------------------------------------------------------|--------------------|----------------------------------|-----------------------------------------------------------------------------------------------------------------------------------------------------------------------------------------------------------------------------------------------------------------------------------------------------------------------------------------------------------------------------------------------------------------------------------------------------------------------------------------------------------------------------------------------------------------------------|------------------------------------------------------------------|--------|-----------------------|
| <p>P: No intervention.</p> <p>Self-reported smoking status (smoker: one cigarette per day for three consecutive months)</p> <p>C: No</p> | Other SLE patients | Intervention: 65<br>Control: 665 | <p>Disease activity/manifestations SLEDAI<br/>Smokers:12.5(8.9)<br/>Non-smokers:10. (7.1)<br/>p=0.028</p> <p>Manifestations<br/>Smokers had higher frequency of Microscopic haematuria (30.8% versus 19.1%, p=0.025), photosensitivity (35.9% versus 18%, p=0.006), nephropathy (59.4% versus 39.8%, p=0.011) and proteinuria (54.7% versus 35.2%, p=0.010), but not in other SLEDAI descriptors.</p> <p>Inflammatory markers<br/>There were no differences between smokers and non-smokers in ANA, anti-dsDNA, anti-Sm, anti-RNP, SSA/SSB and aPL antibody positivity.</p> | Disease activity/manifestations: Yes<br>Inflammatory markers: No | 1; R   | Xu, 2015 [108]        |
| <p>P: 1° group= warm shower / 2° group= warm footbath with adding of 2 cups of Epsom salt</p> <p>C: Warm shower</p>                      | Other SLE patients | Intervention: 60<br>Control: 30  | <p>Fatigue<br/>Warm shower, mean difference<br/>baseline - day 3: 1.90000, p=0.001<br/>baseline - day 5: 2.34333, p=0.002<br/>baseline - day 7: 2.90000, p=0.001</p> <p>Footbath using warm water only, mean difference<br/>baseline - day 3: 0.76667, p=0.305<br/>baseline - day 5: 0.10000, p=0.878<br/>baseline - day 7: 1.43333, p=0.052</p> <p>Footbath using Epsom salt, mean difference<br/>baseline - day 3: 0.66667, p=0.268<br/>baseline - day 5: 1.00000, p=0.116<br/>baseline - day 7: 1.24000, p=0.110</p>                                                     | Fatigue: Yes                                                     | 10; R  | Abdelaziz, 2020 [109] |

| Intervention/management strategy                                                                                                                          | Comparator         | N                               | Results                                                                                                                                                                                                                                                                                                                                                                                                                                                                                                                                                                                                    | Efficacy                                                                                                        | SD&OA* | Reference            |
|-----------------------------------------------------------------------------------------------------------------------------------------------------------|--------------------|---------------------------------|------------------------------------------------------------------------------------------------------------------------------------------------------------------------------------------------------------------------------------------------------------------------------------------------------------------------------------------------------------------------------------------------------------------------------------------------------------------------------------------------------------------------------------------------------------------------------------------------------------|-----------------------------------------------------------------------------------------------------------------|--------|----------------------|
| <p>P: Training of the patient on how to use the cosmetic camouflage. Letting the patient use camouflage based on personal needs.</p> <p>C: Usual care</p> | Other SLE patients | Intervention: 28<br>Control: 15 | <p>Depression<br/>b = 1.92, 95%CI: (-3.67, -0.16), p=0.033<br/>No significant changes in the control group</p> <p>Anxiety<br/>b = 2.87, 95%CI: (-5.67, -0.07), p=0.045<br/>No significant changes in the control group</p> <p>Self-esteem<br/>b= 2.79 95%CI: (0.13, 5.46)<br/>p=0.041<br/>No significant changes in the control group</p> <p>HRQoL<br/>b = 7.56, 95%CI: (-47.86, -7.27), p=0.009<br/>No significant changes in the control group</p> <p>Skin damage<br/>DLQI<br/>b = 7.65, 95%CI: (-12.31, -3.00), p=0.002<br/>No significant changes in the control group</p>                             | <p>Depression: Yes/No<br/>Anxiety: Yes/No<br/>Self-esteem: Yes/No<br/>HRQoL: Yes/No<br/>Skin damage: Yes/No</p> | 11; W  | Oliveira, 2020 [110] |
| <p>P: Transcutaneous auricular vagus nerve stimulation (taVNS)</p> <p>C: Sham-stimulation</p>                                                             | Other SLE patients | Intervention: 12<br>Control: 6  | <p>Disease activity<br/>Decrease from baseline to day 5 of both PtGA PGA in taVNS subjects compared to SS (not statistically significant: p=0.125, p=0.053, PtGA, PGA respectively)</p> <p>Fatigue<br/>Reduction in taVNS compared with SS (11.00 vs 0.00, p=0.003)</p> <p>Pain<br/>Reduction in taVNS compared with SS (-5.00 vs 0.10, p=0.049)</p> <p>Swollen joint<br/>taVNS: 100.0 (100.0 to 100.0)<br/>SS: 9.09 (-8.33 to 57.15)</p> <p>Inflammatory markers<br/>No significant changes in serum levels of IFN<math>\alpha</math>, IL-1<math>\beta</math>, IL-6, IL-8, IL-10, IL1RA, IL-18 or TNF</p> | <p>Disease activity: No<br/>Fatigue: Yes<br/>Pain: Yes<br/>Swollen joint: Yes<br/>Inflammatory markers: No</p>  | 11; I  | Aranow, 2021 [111]   |
| SSc                                                                                                                                                       |                    |                                 |                                                                                                                                                                                                                                                                                                                                                                                                                                                                                                                                                                                                            |                                                                                                                 |        |                      |
| Physical exercise and physical activity                                                                                                                   |                    |                                 |                                                                                                                                                                                                                                                                                                                                                                                                                                                                                                                                                                                                            |                                                                                                                 |        |                      |

| Intervention/management strategy                                                                                                            | Comparator                      | N                                                                         | Results                                                                                                                                                                                                                                                    | Efficacy | SD&OA* | Reference                 |
|---------------------------------------------------------------------------------------------------------------------------------------------|---------------------------------|---------------------------------------------------------------------------|------------------------------------------------------------------------------------------------------------------------------------------------------------------------------------------------------------------------------------------------------------|----------|--------|---------------------------|
| P: Mouth stretching exercise and oral augmentation exercise<br>C: N/A: intraindividual assessment                                           | N/A; intraindividual assessment | Intervention: 10 selected among 35 patients with MMO≤30mm<br>Control: N/A | MMO: +10.7 mm (2.06-SD), p<0.0049. Similar for dentulous and edentulous.                                                                                                                                                                                   | Yes      | 10; R  | Pizzo, 2003 [112]         |
| P: Paraffin bath and hand exercises<br>C: N/A: intraindividual assessment                                                                   | N/A; intraindividual assessment | Intervention: 17<br>Control: N/A                                          | Improvement in finger flexion and extension deficit, p<0.01<br>Thumb abduction, volar flexion wrist, p<0.05<br>VAS stiffness and VAS skin, p<0.001                                                                                                         | Yes      | 10; I  | Sandqvist, 2004 [113]     |
| P: Self-administrated stretching<br>C: No intervention                                                                                      | Healthy controls                | Intervention: 45<br>Control: 21 healthy controls                          | Total passive range of movement was significantly improved in each finger after 1m of intervention.                                                                                                                                                        | Yes      | 10; I  | Mugii, 2006 [114]         |
| P: Individualised rehabilitation program followed by at-home exercise<br>C: Usual care                                                      | Other SSc patients              | Intervention: 16<br>Control: 17                                           | Non-significant (ns) change in HAQ-DI. SF-36, Increase in both MCS and PCS (p=0.013 and 0.001 resp.). Significant improvement in HAMIS (both hands) and SGRQ (all domains).                                                                                | Yes/no   | 10; R  | Antonioli, 2009 [115]     |
| P: Connective tissue massage, Mc Mennell joint manipulation and home exercise<br>C: Home exercise programme alone                           | Other SSc patients              | Intervention: 20<br>Control: 20                                           | Intervention: Fist closure, HAMIS, Cochin hand functional disability scale, (HAQ, PSI, MSI) of SF-36 p<0.05<br>Control: only fist closure p<0.0001                                                                                                         | Yes      | 11; I  | Bongi, 2009 [116]         |
| P: Tailored rehabilitation program with manual therapy and exercise<br>C: Educational advice and information about SSc                      | Other SSc patients              | Intervention: 10<br>Control: 10                                           | Intervention group: HAMIS: T0-T1: p<0.005<br>T0-T2: p<0.01<br>Mouth opening: T0-T1: p<0.05<br>T0-T2: p<0.01// MSI and PSI (SF-36), HAQ, DURUOZ scale, Fist closure, FACE-VAS significant in T0-T1, NS in T0-T2<br>Hand opening NS in both T0-T1- and T0-T2 | Yes      | 11; W  | Maddali Bongi, 2009 [117] |
| P: Aerobic exercise programme<br>C: Aerobic exercise programme                                                                              | Healthy controls                | Intervention: 7<br>Control: 7                                             | Baseline: SSc: 19.72 (3.51)<br>Control: 22.94 (4.70)<br>w8: SSc: 22.27 (2.53)<br>Control: 24.55 (3.00)<br>p between group= 0.149                                                                                                                           | Yes      | 10; I  | Oliveira, 2009 [118]      |
| P: Combined connective tissue massage, Kabat's technique, kinesitherapy and home mimic exercise program<br>C: Home exercise programme alone | Other SSc patients              | Intervention: 20<br>Control: 20                                           | Intervention: Mouth opening, T0: 3.8 (1.06), T1: 4.28 (0.99), T2: 4.58 (1.16)<br>T0-T1: p<0.05, T0-T2 p<0.001. Control: Mouth opening: T0: 4.0 (1.09), T1: 4.48 (1.04), T2: 4.1 (1.05)<br>T0-T1: p<0.001<br>T0-T2: HAQ & SF-36 ns.                         | Yes      | 11; I  | Maddali Bongi, 2011 [119] |

| Intervention/management strategy                                                                                            | Comparator                      | N                                                         | Results                                                                                                                                                                                                                                                                                                                                                                                                                                                                                                                                                                                                              | Efficacy | SD&OA* | Reference         |
|-----------------------------------------------------------------------------------------------------------------------------|---------------------------------|-----------------------------------------------------------|----------------------------------------------------------------------------------------------------------------------------------------------------------------------------------------------------------------------------------------------------------------------------------------------------------------------------------------------------------------------------------------------------------------------------------------------------------------------------------------------------------------------------------------------------------------------------------------------------------------------|----------|--------|-------------------|
| P: Supervised, treadmill, treadmill (aerobic), stretching exercise<br>C: N/A: intraindividual assessment                    | N/A; intraindividual assessment | Intervention: 11<br>Control: N/A                          | Significant improvement in 4/6 exercises. Change in anaerobic threshold, respiratory compensation point and peak of exercise in SSc patients, $P \leq 0.05$ .                                                                                                                                                                                                                                                                                                                                                                                                                                                        | Yes      | 10; R  | Pinto, 2011 [120] |
| P: Multi-faceted oral health intervention<br>C: Usual care                                                                  | Other SSc patients              | Intervention: 26<br>Control: 22                           | Reduction of gingival index (GI) in intervention: 20.8% after 6 months<br>Intervention vs Control at 6 months showed significant reduction in GI by 8%, $p=0.0007$ .                                                                                                                                                                                                                                                                                                                                                                                                                                                 | Yes      | 11; W  | Yuen, 2011 [121]  |
| P: Orofacial exercise + multifaceted oral health intervention<br>C: Usual care                                              | Other SSc patients              | Intervention: 26<br>Control: 22                           | F1-B: Intervention: 1.44 (2.83), $P$ (intra-group difference) = 0.02<br>Control: -0.09 (3.16) $p=0.71$ . $P$ (inter-group difference) = 0.04<br>F(final)-B: Intervention: 2.14 (2.88), $P$ (intra-group) = 0.001<br>Control: 2.26 (4.28), $p=0.02$ . $P$ (inter-group difference) = 0.19                                                                                                                                                                                                                                                                                                                             | No       | 11; I  | Yuen, 2012 [122]  |
| P: Stretching and mobility exercises at home using a newly developed telemedicine system<br>C: Home kinesiotherapy protocol | SSc patients and RA-patients    | Intervention: 20 (10 with RA)<br>Control: 20 (10 with RA) | Dreiser's index changes over time: Intervention: $p=0.006$<br>Control: $p=0.006$<br>Intervention vs Control: $p=0.496$ , Interaction effect: $p=0.984$<br>HAQ changes over time: Intervention: $p=0.016$<br>Control: $p=0.063$<br>Intervention vs Control: $p=0.287$ , Interaction effect: $p=0.988$<br>HAMIS right hand changes over time: Intervention: $p=0.016$<br>Control: $p=0.104$<br>Intervention vs Control: $p=0.832$ , Interaction: $p=0.246$<br>HAMIS Left hand changes over time: Intervention: $p=0.075$<br>Control: $p=0.529$<br>Intervention vs Control: $p=0.401$ , Interaction effect: $p=0.124$ . | No       | 11; W  | Piga, 2014 [123]  |

| Intervention/management strategy                                                                                                                                                                                     | Comparator         | N                                 | Results                                                                                                                                                                                                                                                                                                                                                                                                                                                                         | Efficacy | SD&OA* | Reference                |
|----------------------------------------------------------------------------------------------------------------------------------------------------------------------------------------------------------------------|--------------------|-----------------------------------|---------------------------------------------------------------------------------------------------------------------------------------------------------------------------------------------------------------------------------------------------------------------------------------------------------------------------------------------------------------------------------------------------------------------------------------------------------------------------------|----------|--------|--------------------------|
| P: Muscle strength<br>C: No intervention                                                                                                                                                                             | Healthy controls   | Intervention: 20<br>Control: 20   | SSc patients exhibit a reduction in quadriceps strength (p=0.0001), increased quadriceps fatigability (p=0.034), impaired pulmonary function and reduced 6MWD (p=0.0001) compared to control<br>Quadriceps strength significantly correlated with 6MWD (Rho = 0.719, p=0.0004) and HAQ-DAI (Rho = -0.622, p=0.003)<br>Significant correlations between quadriceps fatigability and maximal inspiratory, (Rho = 0.684, p=0.0009) and expiratory pressure (Rho = 0.472, p=0.035). | N/A      | 1; R   | Lima, 2015 [124]         |
| P: Hand stretching exercise and weekly phone call with occupational therapist, with specific timetable for when to conduct exercise<br>C: Hand stretching exercise and weekly phone call with occupational therapist | Other SSc patients | Intervention: 15<br>Control: 16   | Intervention: T0: 5.75 median (IQR 4.5, 6.5)<br>T1: 6.7 (5.6, 7.3), p<0.0001<br>T2: 6.8 (6.15, 8), p<0.001<br>Other score such as COPM satisfaction, significant at both T0-T1 & T0-T2. HAQ, SF-36 (mental) significant in T0-T2<br>Control: T0: 5.27 (4.6, 6.4), T1: 5.53 (4.9, 6.7)<br>T2: 5.4 (4.7, 7.1), p<0.04<br>HAQ significant in both T0-T1 & T0-T2. SF-36 (mental) significant in T0-T2.                                                                              | Yes      | 11; I  | Stefanantoni, 2016 [125] |
| P: Hand stretching & hip exercise, ergotherapy, thermal & mud bath, whirlpool therapy, soft tissue massage of the hands and joints<br>C: Same as intervention, but excluding treatment of the hands.                 | Other SSc patients | Intervention: 31<br>Control: 22   | Intervention: T0: 1.125 median, (IQR 0.6-1.6)<br>T6: 0.75 (0.25-1.5)<br>p=0.017<br>Control: T0: 0.875 (0.4-1.2)<br>T6: 0.875 (0.4-1.4)<br>p=0.442                                                                                                                                                                                                                                                                                                                               | Yes      | 10; R  | Horváth, 2017 [126]      |
| P: Personalized physical therapy session with physiotherapist and occupational therapist<br>C: Usual care                                                                                                            | Other SSc patients | Intervention: 110<br>Control: 108 | Personalized physical therapy: 1.19 (0.74) (n=93)<br>Usual care: 1.2 (0.74) (n=87)<br>p=0.86                                                                                                                                                                                                                                                                                                                                                                                    | No       | 11; R  | Rannou, 2017 [127]       |

| Intervention/management strategy                                                                                                                        | Comparator                      | N                                                       | Results                                                                                                                                                                                                                                                                                                                                                    | Efficacy | SD&OA* | Reference               |
|---------------------------------------------------------------------------------------------------------------------------------------------------------|---------------------------------|---------------------------------------------------------|------------------------------------------------------------------------------------------------------------------------------------------------------------------------------------------------------------------------------------------------------------------------------------------------------------------------------------------------------------|----------|--------|-------------------------|
| P: Exercise habits<br>C: No intervention                                                                                                                | Other SSc patients              | Intervention: 389<br>Control: 363                       | HAQ, mean (SD): Exercise, 0.7 (0.7)<br>Non-exercise: 0.9 (0.7)<br>RR (95%CI): 0.26 (0.16, 0.36)<br>PROMIS-29: Exercise was significantly associated with higher scores for function & social roles, lower score for anxiety, depression and fatigue. Furthermore, exercise was significantly associated with age, more years of education and non-smoking. | N/A      | 5; I   | Azar, 2018 [128]        |
| P: Manual therapy and physiotherapy, three weeks every year for three years<br>C: N/A: intraindividual assessment                                       | N/A; intraindividual assessment | Intervention: 43<br>Control: N/A                        | T0 (admission): 1.2 (0.6), T1(discharge): 0.8 (0.6), T2: 1.3 (0.6), T3: 1.0 (0.6), T4: 1.4 (0.7), T5: 1.1(0.7)<br>T0-T1: p<0.0001<br>T2-T3: p<0.0001<br>T4-T5: p<0.0001                                                                                                                                                                                    | Yes      | 10; R  | Brignoli, 2018 [129]    |
| P: Intervention 1: HIIT (cycling) twice a week for 12 weeks<br>Intervention 2: HIIT (arm cranking) twice a week for 12 weeks<br>C: No training protocol | Other SSc patients              | Intervention 1: 11<br>Intervention 2: 11<br>Control: 12 | CVC: no significant changes after intervention<br><br>$\Delta$ TcpO2: non-significant increase in intervention 2 (p=0.59)<br><br>VO2max and EQ-5D: significant increase in both interventions (p<0.05 and p<0.001 respectively)                                                                                                                            | No       | 11; W  | Mitropoulos, 2018 [130] |
| P: Thermal modalities, tissue mobilisation, and upper extremity exercises with occupational therapist<br>C: N/A: intraindividual assessment             | N/A; intraindividual assessment | Intervention: 21<br>Control: N/A                        | Significant improvement of QuickDASH (p=0.0012) and PROMIS (p=0.004)                                                                                                                                                                                                                                                                                       | Yes      | 10; R  | Murphy, 2018 [131]      |
| P: Paraffin bath and hand exercises<br>C: Hand exercises without wax bath                                                                               | Other SSc patients              | Intervention: 17<br>Control: 19                         | Inter-group comparison showed no evidence of effectiveness<br>Intervention vs Control (mean (95%CI)): -1.5 (-3.6, 0.6), p=0.16 at 9 weeks<br>1.9 (-1.1, 5.0), p=0.20 at 18 weeks                                                                                                                                                                           | No       | 11; I  | Gregory, 2019 [132]     |
| P: Paraffin bath and hand exercises<br>C: Water bath, hand exercise                                                                                     | Other SSc patients              | Intervention: 43<br>Control: 43                         | HAMIS changes after 6 months: Intervention: -2.6 (95%CI: -4.4, -0.8), p<0.05<br>Control: -3.3 (-5.2 -1.5), p<0.05<br>Changes after 12 months: Intervention: -3.0 (-4.8 -1.2), p<0.05<br>Control: -2.9 (-4.6 -1.1), p<0.05                                                                                                                                  | No       | 11; I  | Kristensen, 2019 [133]  |

| Intervention/management strategy                                                                                                             | Comparator                      | N                                | Results                                                                                                                                                                                                         | Efficacy | SD&OA* | Reference               |
|----------------------------------------------------------------------------------------------------------------------------------------------|---------------------------------|----------------------------------|-----------------------------------------------------------------------------------------------------------------------------------------------------------------------------------------------------------------|----------|--------|-------------------------|
| P: Home based self-management programme that consisted of a booklet and information about SSC<br>C: N/A: intraindividual assessment          | N/A; intraindividual assessment | Intervention: 22<br>Control: N/A | Pain-VAS: T0: 3.97 (2.92)<br>T1: 2.61 (2.11)<br>T2: 2.21 (2.07)<br>p=0.0022, effect-size (ES) = 0.695<br>CHFS: T0: 19.24 (15.78)<br>T1: 16.86 (15.42)<br>T2: 12.48 (12.04)<br>p<0.0001, ES = 0.482              | Yes      | 10; R  | Landim, 2019 [134]      |
| P: Combined programme with HIIT and resistance training, twice weekly for 12 weeks<br>C: No intervention                                     | Other SSC patients              | Intervention: 16<br>Control: 16  | Significant improvements in CVC, $\Delta$ TcpO2 and VO2max after 12 weeks in intervention vs control (p<0.05 for all). No significant changes between 3- and 6-month follow-up.                                 | Yes      | 11; W  | Mitropoulos, 2019 [135] |
| P: Tai Chi<br>C: Home exercise                                                                                                               | Other SSC patients              | Intervention: 14<br>Control: 14  | Tai Chi: all variables p<0.05<br>Home-exercise only trunk lateral endurance p=0.007 and Pittsburg sleep quality test p=0.036<br>Delta value in all variables p<0.05 except trunk lateral endurance test p=0.061 | Yes/no   | 11; W  | Cetin, 2020 [136]       |
| P: Home-based aerobic exercise (stationary bike), muscular endurance training (upper limbs) and stretching (hands)<br>C: Usual care          | Other SSC patients              | Intervention: 22<br>Control: 22  | 6MWT: Intervention: T0: 486 (458-513-IQR)<br>T1: 532 (504-561)<br>Control: T0: 464 (431-497)<br>T1: 459 (427-490)<br>p<0.001                                                                                    | Yes      | 11; I  | Filippetti, 2020 [137]  |
| P: Self-management programme composed of a booklet<br>C: No intervention                                                                     | Other SSC patients              | Intervention: 40<br>Control: 17  | Improvement noted only in intervention group, P<0.05, with large effect size                                                                                                                                    | Yes      | 10; I  | Landim, 2020 [138]      |
| P: Orofacial exercise programme followed by oral hygiene care advice<br>C: Oral hygiene care advice followed by orofacial exercise programme | Other SSC patients              | Intervention: 28<br>Control: 28  | T1: Intervention: Mean difference 1.94 (1.19-2.69)<br>p<0.001<br>Control: -0.09 (-0.43-0-24)<br>p=0.579<br>T2: Intervention: 0.38 (0.44-1.20) p=0.352<br>Control 1.71 (0.91-2.50)<br>p<0.001                    | Yes      | 11; I  | Cüzdan, 2021 [139]      |
| P: High-intensity interval exercise (HIIT)<br>C: N/A: intraindividual assessment                                                             | N/A; intraindividual assessment | Intervention: 11<br>Control: N/A | All parameters p<0.05 except domain Disability index p=0.0571                                                                                                                                                   | Yes/no   | 10; I  | Defi, 2021 [140]        |

| Intervention/management strategy                                                                                                                                                           | Comparator                      | N                                                    | Results                                                                                                                                                                                                                                                                                                                                                                                                            | Efficacy | SD&OA* | Reference                  |
|--------------------------------------------------------------------------------------------------------------------------------------------------------------------------------------------|---------------------------------|------------------------------------------------------|--------------------------------------------------------------------------------------------------------------------------------------------------------------------------------------------------------------------------------------------------------------------------------------------------------------------------------------------------------------------------------------------------------------------|----------|--------|----------------------------|
| P: Booklet, isometric hand exercise and self-administrated stretching<br>C: Booklet alone                                                                                                  | Other SSc patients              | Intervention: 32<br>Control: 30                      | Improvement percentage-wise for HAMIS, Duruoz Hand Index (DHI), HAQ-DI and Handgrip strength ( $p < 0.05$ ). SF-36: significant improvement in 3/8 domains. Change in mRSS ns.                                                                                                                                                                                                                                     | Yes      | 11; I  | Gokcen, 2021 [141]         |
| P: Home exercises for temporomandibular joint, mimic, masticatory and cervical spine muscles<br>C: Home exercises and combined physiotherapeutic procedures performed by a physiotherapist | Other SSc patients              | Intervention: 25<br>Control: 22                      | Both intervention & control showed improved clinical parameters but better result in the intervention group. Differences in effect between groups at T1: MHISS total: Intervention: -7.08 (8.06) Control: -2.00 (5.72) $p=0.0178$ MHISS mouth opening: Intervention: -4.04 (4.46) Control: -0.91 (3.32) $p=0.0098$                                                                                                 | Yes      | 11; W  | Maddali Bongji, 2021 [142] |
| P: Intensive occupational therapy and app-delivered home exercise.<br>C: App alone                                                                                                         | Other SSc patients              | Intervention: 16<br>Control: 16                      | T1: QuickDASH: Intervention: -8.5 (3.9), $p=0.03$<br>App alone-group (AA): -3.1 (4.3), $p=0.47$<br>MCID: intervention: 38% (n=16)<br>AA 21% (n=14)<br>T2: AA achieved equivalent improvement with mean of -6.4 point<br>MCID intervention: 50% (n=16)<br>app-alone: 64% (n=11)                                                                                                                                     | Yes      | 11; W  | Murphy, 2021 [143]         |
| <b>Patient education and self-management</b>                                                                                                                                               |                                 |                                                      |                                                                                                                                                                                                                                                                                                                                                                                                                    |          |        |                            |
| P: Educational programme<br>C: N/A: intraindividual assessment                                                                                                                             | N/A; intraindividual assessment | Intervention: 6<br>Control: N/A                      | SEP: 3/6 showed improvement<br>SEF: showed stable among all 6 patients<br>SEOS: showed improvement in 5/6 patient, while the remaining patient had excellent score from the beginning                                                                                                                                                                                                                              | Yes/no   | 10; I  | Samuelson, 2000 [144]      |
| P: Educational programme<br>C: Educational programme                                                                                                                                       | SLE-patients                    | Intervention: 5 with SSc, 5 with SLE<br>Control: N/A | Overall satisfaction with both programmes, however SLE revealed a more positive feeling about their attendance. Both groups felt that it was valuable to meet individuals with the same disease and welcomed an educator within the program planning team. Both groups were unanimously satisfied with the content and format. Behaviour-wise, SLE patients revealed more definite life changes than SSc patients. | Yes      | 9; R   | Brown, 2004 [36]           |



| Intervention/management strategy                                                                                                    | Comparator                      | N                                                                   | Results                                                                                                                                                                                                                                                                                                                                                                    | Efficacy | SD&OA* | Reference              |
|-------------------------------------------------------------------------------------------------------------------------------------|---------------------------------|---------------------------------------------------------------------|----------------------------------------------------------------------------------------------------------------------------------------------------------------------------------------------------------------------------------------------------------------------------------------------------------------------------------------------------------------------------|----------|--------|------------------------|
| P: Multidisciplinary disease management programme<br>C: N/A: intraindividual assessment                                             | N/A; intraindividual assessment | Intervention: 41<br>Control: N/A                                    | ICQ (helplessness): T0: 13.1 (4.2)<br>T1: -1.24 (-2.27, -0.22), ES=-0.32<br>T2: -1.05 (-2.03, -0.08), ES: -0.26<br>p=0.02<br>Acceptance of limitations: T0: 29 (4.9)<br>T1: -1.60 (-3.22, 0.02), ES:-0.28<br>T2: -2.24 (-3.73, -0.75), ES: -0.44<br>p=0.01<br>Other parameters such as VAS, HAQ DI, IRGL showed NS.                                                        | Yes/no   | 10; R  | Kwakkenbos, 2011 [145] |
| P: Mail-delivered self-management programme<br>C: N/A: intraindividual assessment                                                   | N/A; intraindividual assessment | Intervention: 62 (49 completers, 13 non-completers)<br>Control: N/A | Self-efficacy, domain pain: T0: 5.2 (2.7), T1: 6.4 (2.7)<br>Changes: 1.2 (2.9), p=0.006<br>Multidimensional assessment of fatigue scale, CES-D, HAQ, SFAQ, no. of ED visits showed NS<br>It showed significantly more married persons completed the program, suggesting a supportive partner may play a roll (married completers: 36 (73), married non-completers: 5 (52)) | Yes/no   | 10; I  | Poole, 2013 [146]      |
| P: Self-management website with 10 modules<br>C: N/A: intraindividual assessment                                                    | N/A; intraindividual assessment | Intervention: 16<br>Control: N/A                                    | SE scale: p=0.084<br>HeiQ: T0: 114.6 (9.9), T1: 120.6 (7.7), p=0.012, ES: 0.72<br>PAM: T0: 38.5 (5.2), T1: 41.5 (5.0), p=0.025, ES 0.62<br>CES-D: T0: 20.7 (9.6), T1: 16.4 (8.9), p=0.013, ES -0.71<br>Fatigue VAS: T0: 8.1 (1.4), T1: 7.6 (1.4), p=0.05, ES -0.55                                                                                                         | Yes/no   | 10; R  | Poole, 2014 [147]      |
| P: Informative meeting followed by occupational therapy<br>C: Informative meeting alone                                             | Other SSc patients              | Intervention: 10<br>Control: 10                                     | HAQ: Intervention: T0: 14.9 (11.3)<br>T1: 11.8 (7.1)<br>Control T0: 13.3 (13.1)<br>T1: 13.9 (13.5). p<0.05                                                                                                                                                                                                                                                                 | Yes      | 10; R  | Zanatta, 2017 [148]    |
| P: Self-management website<br>C: Book                                                                                               | Other SSc patients              | Intervention: 134<br>Control: 133                                   | PROMIS T0-T1 NS between groups. EQ5D-Index: Intervention: T0-T1: -0.002 (0.14)<br>Control: 0.02 (0.14)<br>p=0.05                                                                                                                                                                                                                                                           | Yes/no   | 11; W  | Khanna, 2019 [149]     |
| P: Home based self-management programme that consisted of a booklet and information about SSc<br>C: N/A: intraindividual assessment | N/A; intraindividual assessment | Intervention: 22<br>Control: N/A                                    | Pain-VAS: T0: 3.97 (2.92)<br>T1: 2.61 (2.11)<br>T2: 2.21 (2.07)<br>p=0.0022, effect-size (ES) = 0.695<br>CHFS: T0: 19.24 (15.78)<br>T1: 16.86 (15.42)<br>T2: 12.48 (12.04)<br>p<0.0001, ES = 0.482                                                                                                                                                                         | Yes      | 10; R  | Landim, 2019 [134]     |

| Intervention/management strategy                                                                                                                                                                     | Comparator                      | N                                | Results                                                                                                                                                                                                          | Efficacy | SD&OA* | Reference             |
|------------------------------------------------------------------------------------------------------------------------------------------------------------------------------------------------------|---------------------------------|----------------------------------|------------------------------------------------------------------------------------------------------------------------------------------------------------------------------------------------------------------|----------|--------|-----------------------|
| P: Scleroderma Support group Leader Education (SPIN-SSLED) programme<br>C: N/A: intraindividual assessment                                                                                           | N/A; intraindividual assessment | Intervention: 10<br>Control: N/A | SSGLSS, baseline mean (SD), 124.4 (22) and post training 159.2 (17.1)<br>Feasibility outcome: attendance rate 95%, 123/130 sessions<br>Overall feedback 9.4/10<br>No concerns related adverse event was reported | Yes      | 10; R  | Thombs, 2019 [150]    |
| P: Face-to-face training + standard information programme (i.e., brochures, DVD)<br>C: Educational materials alone                                                                                   | Other SSc patients              | Intervention: 31<br>Control: 32  | ITT: Mouth opening: Intervention 0.31 (0.13-0.49), p=0.003 Control: 0.13 (0.01-0.25) 0.06 inter-group difference p=0.10<br>Per-protocol analysis: inter-group difference p=0.02                                  | Yes/no   | 11; I  | Uras, 2019 [151]      |
| P: Self-management programme composed of a booklet<br>C: No intervention                                                                                                                             | Other SSc patients              | Intervention: 40<br>Control: 17  | Improvement noted only in intervention group, P≤0.05, with large effect size                                                                                                                                     | Yes      | 10; I  | Landim, 2020 [138]    |
| P: Videoconference-based group intervention that provided education and practice with mental health coping strategies<br>C: No intervention                                                          | Other SSc patients              | Intervention: 86<br>Control: 86  | PROMIS anxiety score immediately after intervention: -1.57 (95% CI: 3.59, 0.45)                                                                                                                                  | No       | 11; I  | Thombs, 2021 [152]    |
| <b>Bathing and thermal modalities</b>                                                                                                                                                                |                                 |                                  |                                                                                                                                                                                                                  |          |        |                       |
| P: Paraffin bath and hand exercises<br>C: N/A: intraindividual assessment                                                                                                                            | N/A; intraindividual assessment | Intervention: 17<br>Control: N/A | Improvement in finger flexion and extension deficit, p<0.01<br>Thumb abduction, volar flexion wrist, p<0.05<br>VAS stiffness and VAS skin, p<0.001                                                               | Yes      | 10; I  | Sandqvist, 2004 [113] |
| P: Hand stretching & hip exercise, ergotherapy, thermal & mud bath, whirlpool therapy, soft tissue massage of the hands and joints<br>C: Same as intervention, but excluding treatment of the hands. | Other SSc patients              | Intervention: 31<br>Control: 22  | Intervention: T0: 1.125 median, (IQR 0.6-1.6)<br>T6: 0.75 (0.25-1.5) p=0.017<br>Control: T0: 0.875 (0.4-1.2)<br>T6: 0.875 (0.4-1.4) p=0.442                                                                      | Yes      | 10; R  | Horváth, 2017 [126]   |

| Intervention/management strategy                                                                                                                                                     | Comparator                              | N                                                          | Results                                                                                                                                                                                                                                                                                                                                                                                             | Efficacy | SD&OA* | Reference              |
|--------------------------------------------------------------------------------------------------------------------------------------------------------------------------------------|-----------------------------------------|------------------------------------------------------------|-----------------------------------------------------------------------------------------------------------------------------------------------------------------------------------------------------------------------------------------------------------------------------------------------------------------------------------------------------------------------------------------------------|----------|--------|------------------------|
| P: Thermal modalities, tissue mobilisation, and upper extremity exercises with occupational therapist<br><br>C: N/A: intraindividual assessment                                      | N/A; intraindividual assessment         | Intervention: 21<br>Control: N/A                           | Significant improvement of QuickDASH (p=0.0012) and PROMIS (p=0.004)                                                                                                                                                                                                                                                                                                                                | Yes      | 10; R  | Murphy, 2018 [131]     |
| P: Taohong Siwu Decoction (TSD) + oral Prednisone (10mg daily)<br><br>C: Placebo + oral prednisone                                                                                   | Other SSc patients                      | Intervention: 71<br>Control: 71                            | MRSS: Intervention: T2: p<0.05<br>Control: NS                                                                                                                                                                                                                                                                                                                                                       | Yes      | 11; I  | Zhou, 2018 [153]       |
| P: Paraffin bath and hand exercises<br><br>C: Hand exercises without wax bath                                                                                                        | Other SSc patients                      | Intervention: 17<br>Control: 19                            | Inter-group comparison showed no evidence of effectiveness<br>Intervention vs Control (mean (95%CI)): -1.5 (-3.6, 0.6), p=0.16 at 9 weeks<br>1.9 (-1.1 to 5.0), p=0.20 at 18 weeks                                                                                                                                                                                                                  | No       | 11; I  | Gregory, 2019 [132]    |
| P: Paraffin bath and hand exercises<br><br>C: Water bath, hand exercise                                                                                                              | Other SSc patients                      | Intervention: 43<br>Control: 43                            | HAMIS changes after 6 months: Intervention: -2.6 (95%CI -4.4, -0.8), p<0.05<br>Control: -3.3 (-5.2 -1.5), p<0.05<br>Changes after 12 months: Intervention: -3.0 (-4.8 -1.2), p<0.05<br>Control: -2.9 (-4.6 -1.1), p<0.05                                                                                                                                                                            | No       | 11; I  | Kristensen, 2019 [133] |
| P: Intervention 1 (I1): Hand immersion in Bastian CO <sub>2</sub> bath.<br>Intervention 2 (I2): Hand immersion in hot water<br><br>C: Hand immersion in Bastian CO <sub>2</sub> bath | Other SSc patients and healthy controls | Intervention: 12 in each intervention group<br>Control: 12 | RI at baseline and during treatment was higher in both I1 and I2 than healthy control, p<0.01<br>RI at baseline between I1 and I2 was not different<br>Treatment-induced reduction in RI was significant in I1, p<0.01 directly after CO <sub>2</sub> bath with a non-significant lasting tendency 10 to 20mins after I2 and healthy control showed no significant changes in RI at all time points | Yes      | 11; I  | Lange, 2019 [154]      |

| Intervention/management strategy                                                                                                                                                                     | Comparator                      | N                                              | Results                                                                                                                                                                                                                                                                                                                                                                                                                                                 | Efficacy | SD&OA* | Reference             |
|------------------------------------------------------------------------------------------------------------------------------------------------------------------------------------------------------|---------------------------------|------------------------------------------------|---------------------------------------------------------------------------------------------------------------------------------------------------------------------------------------------------------------------------------------------------------------------------------------------------------------------------------------------------------------------------------------------------------------------------------------------------------|----------|--------|-----------------------|
| P: Ozone bath, 2 series of 10 days per series with 10 days apart<br>C: N/A: intraindividual assessment                                                                                               | N/A; intraindividual assessment | Intervention: 42<br>Control: N/A               | Mean concentration (conc.) of IL-2sR decreased significantly from 1563.73 to 1249.86pg/ml, p=0.02<br>Mean conc. of neopterin decreased significantly from 12.06 to 10.9 nmol/ml, p=0.012<br>Absolute monocytosis decreased insignificantly from 1.694 to 1.480g/l, p=0.2<br>Correlations between the disease duration and conc. of IL-2sR were weak and negative, while between disease duration and concentration of neopterin were weak and positive. | Yes      | 10; I  | Nowicka, 2019 [155]   |
| <b>Complementary and alternative medicine</b>                                                                                                                                                        |                                 |                                                |                                                                                                                                                                                                                                                                                                                                                                                                                                                         |          |        |                       |
| P: Active phase of study: Transcutaneous Electrical Nerve Stimulation (TENS)<br>Prolonged study phase: Patients trained to use TENS on a specific acupoints at home<br>C: Active phase of study only | Healthy controls                | Intervention: 17<br>Control: 9                 | TENS showed significantly increased sympathetic and vagal activities vs baseline (HRV, p=0.02 vs p=0.004)<br>Prolonged TENS application during prolonged phase of study showed a normalization of sympathovagal balance (p=0.04), decreased GI symptoms score (p=0.02), increased physical function score in SF-36 which correlated with the changes in sympathovagal balance (r=0.6, p=0.02).                                                          | Yes      | 10; W  | Sallam, 2007 [156]    |
| P: Deep oscillation, Biofeedback<br>C: No intervention                                                                                                                                               | Other SSC patients              | Intervention: Do: 10<br>Biof: 8<br>Control: 10 | VAS improvement in Biofeedback vs control p<0.05. Deep oscillation vs control p=0.055                                                                                                                                                                                                                                                                                                                                                                   | Yes/no   | 11; W  | Sporbeck, 2012 [157]  |
| P: TENS<br>C: N/A: intraindividual assessment                                                                                                                                                        | N/A; intraindividual assessment | Intervention: 17<br>Control: N/A               | GMA: percentage of normal slow waves increased after 2 weeks from 63.4±5.6% to 82.1±4.2%, p=0.02. NS improvement after 1 30-minute session<br>Questionnaire: Improvement only in nocturnal pain (p=0.04)<br>Acute decrease in VIP (p<0.01). Acute increase in IL-6 (p<0.04), but decrease after 2 weeks (p<0.05).                                                                                                                                       | Yes      | 10; I  | McNearney, 2013 [158] |

| Intervention/management strategy                                                                                 | Comparator                                   | N                               | Results                                                                                                                                                                                                                                                                                                                                 | Efficacy | SD&OA* | Reference             |
|------------------------------------------------------------------------------------------------------------------|----------------------------------------------|---------------------------------|-----------------------------------------------------------------------------------------------------------------------------------------------------------------------------------------------------------------------------------------------------------------------------------------------------------------------------------------|----------|--------|-----------------------|
| P: Biofeedback training<br>C: Biofeedback training                                                               | Patients with functional faecal incontinence | Intervention: 13<br>Control: 26 | FISI T0-T1: SSc: -11 (8), p=0.001<br>Functional FI: -9 (8), p<0.0001<br>FISI at T2: SSc: -10 (8), p=0.008<br>Functional FI: -11 (10), p=0.08<br>Effect on QoL T0-T1: SSc: -2.5 (2), p=0.001<br>Functional FI: -3 (2), p<0.0001<br>Effect on QoL at T2: SSc: -3 (1.8), p=0.008<br>Functional FI: -2.9 (3.1), p=0.06                      | Yes/no   | 2; R   | Collins, 2016 [159]   |
| P: Taohong Siwu Decoction (TSD) + oral Prednisone<br>C: Placebo + oral prednisone                                | Other SSc patients                           | Intervention: 71<br>Control: 71 | MRSS: Intervention: T2: p<0.05<br>Control: NS                                                                                                                                                                                                                                                                                           | Yes      | 11; I  | Zhou, 2018 [153]      |
| P: Received Ciplukan herb (Physalis angulata Linn) 250mg<br>C: Placebo                                           | Other SSc patients                           | Intervention: 29<br>Control: 30 | MRSS: significant decrease in intervention vs control (35.9% vs 6.3%, p<0.001)<br>P1NP level: relative decrease (17.8% vs 0.7%, p=0.002)<br>ESR, BAFF, sCD40L: no decrease in both group<br>Positive correlation between MRSS and P1NP level: r=0.236, p=0.036                                                                          | Yes      | 11; I  | Dewi, 2019 [160]      |
| P: Tai Chi<br>C: Home exercise                                                                                   | Other SSc patients                           | Intervention: 14<br>Control: 14 | Tai Chi: all variables p<0.05<br>Home-exercise only trunk lateral endurance p=0.007 and Pittsburg sleep quality test p=0.036<br>Delta value in all variables p<0.05 except trunk lateral endurance test p=0.061                                                                                                                         | Yes/no   | 11; W  | Cetin, 2020 [136]     |
| P: Holoil (contained Neem oil and Hypericum perforatum)<br>C: Usual care                                         | Other SSc patients                           | Intervention: 21<br>Control: 20 | Antibiotic request: Holoil: 4 (12.1%), Control: 11 (42.3%), p=0.0146<br>Debridement + surgical removal: Holoil: 1(3%), Control: 6 (23.1%), p=0.0367<br>Skin ulcer changes (healing): Holoil: 15 (45.4%), Control: 4 (15.4%), p=0.0237<br>Skin ulcer changes (healing time in days): Holoil: 40.1 (16.3), Control: 96.3 (10.7), p=0.0001 | Yes      | 2; I   | Giuggioli, 2020 [161] |
| <b>Manual therapy</b>                                                                                            |                                              |                                 |                                                                                                                                                                                                                                                                                                                                         |          |        |                       |
| P: Connective tissue massage, Mc Menell joint manipulation and home exercise<br>C: Home exercise programme alone | Other SSc patients                           | Intervention: 20<br>Control: 20 | Intervention: Fist closure, HAMIS, Cochin hand functional disability scale, (HAQ, PSI, MSI) of SF-36 p<0.05<br>Control: only fist closure p<0.0001                                                                                                                                                                                      | Yes      | 11; I  | Bongi, 2009 [116]     |

| Intervention/management strategy                                                                                                             | Comparator                      | N                               | Results                                                                                                                                                                                                                                                                                                                               | Efficacy | SD&OA* | Reference                 |
|----------------------------------------------------------------------------------------------------------------------------------------------|---------------------------------|---------------------------------|---------------------------------------------------------------------------------------------------------------------------------------------------------------------------------------------------------------------------------------------------------------------------------------------------------------------------------------|----------|--------|---------------------------|
| P: Tailored rehabilitation program with manual therapy and exercise<br>C: Educational advice and information about SSc                       | Other SSc patients              | Intervention: 10<br>Control: 10 | Intervention group: HAMIS:<br>T0-T1: p<0.005<br>T0-T2: p<0.01<br>Mouth opening: T0-T1: p<0.05<br>T0-T2: p<0.01// MSI and PSI (SF-36), HAQ, DURUOZ scale, Fist closure, FACE-VAS significant in T0-T1, NS in T0-T2<br>Hand opening NS in both T0-T1 and T0-T2                                                                          | Yes      | 11; W  | Maddali Bongi, 2009 [117] |
| P: Manual lymph drainage (MDL)<br>C: No intervention                                                                                         | Other SSc patients              | Intervention: 20<br>Control: 15 | HAMIS left hand:<br>Interventional group (IG) vs observational group (OG) T0: NS<br>T1: p<0.01<br>T2: p<0.05<br>HAMIS right hand: IG vs OG: T0: NS<br>T1: p<0.01<br>T2: p<0.05<br>IG: HAQ, PSI & MSI of SF-36 improved at T1 p<0.001<br>Only PSI improvement maintained at T2 p<0.001<br>OG: no improvement at T1 and T2 was observed | Yes      | 11; R  | Bongi, 2011 [162]         |
| P: Combined connective tissue massage, Kabat's technique, kinesiotherapy and home mimic exercise program<br>C: Home exercise programme alone | Other SSc patients              | Intervention: 20<br>Control: 20 | Intervention: Mouth opening, T0: 3.8 (1.06), T1: 4.28 (0.99), T2: 4.58 (1.16)<br>T0-T1: p<0.05, T0-T2 p<0.001. Control: Mouth opening: T0: 4.0 (1.09), T1: 4.48 (1.04), T2: 4.1 (1.05)<br>T0-T1: p<0.001<br>T0-T2: HAQ & SF-36 ns.                                                                                                    | Yes      | 11; I  | Maddali Bongi, 2011 [119] |
| P: Daily home programme (warm gloves, Thai massage, stretching)<br>C: Same programme without gloves                                          | Other SSc patients              | Intervention: 14<br>Control: 14 | HAMIS, median (IQR):<br>Intervention: Left hand: T0: 2 (1-2), T1: 1 (1-1), p<0.05<br>Right hand: T0: 2 (1-2), T1: 1 (1-1), p<0.05<br>Control: Left hand: T0: 2 (1-2), T1: 1 (1-1.25), p<0.05<br>Right hand: T0: 2 (1-2), T1: 1 (0-1), p<0.05<br>Wearing gloves resulted in better thumb mobility.                                     | Yes      | 11; W  | Vannajak, 2014 [163]      |
| P: Osteopathic manipulative treatment<br>C: N/A: intraindividual assessment                                                                  | N/A; intraindividual assessment | Intervention: 6<br>Control: N/A | 4/6 improved in hand stiffness, ROM of fingers, most improved distal upper limbs skin score<br>Disease improvement: (pain 6/6, dyspnoea 3/4, fatigue 4/6)<br>Functional status: (global disability 5/5, work disability 4/6, quality of life: physical 6/6, mental 4/6)                                                               | Yes/no   | 4; I   | O'Connor, 2016 [164]      |

| Intervention/management strategy                                                                                                                                                                                        | Comparator                      | N                                | Results                                                                                                                                                                                                                                                                                                                                                                     | Efficacy | SD&OA* | Reference                    |
|-------------------------------------------------------------------------------------------------------------------------------------------------------------------------------------------------------------------------|---------------------------------|----------------------------------|-----------------------------------------------------------------------------------------------------------------------------------------------------------------------------------------------------------------------------------------------------------------------------------------------------------------------------------------------------------------------------|----------|--------|------------------------------|
| <p>P: Hand stretching &amp; hip exercise, ergotherapy, thermal &amp; mud bath, whirlpool therapy, soft tissue massage of the hands and joints</p> <p>C: Same as intervention, but excluding treatment of the hands.</p> | Other SSC patients              | Intervention: 31<br>Control: 22  | <p>Intervention: T0: 1.125 median, (IQR 0.6-1.6)<br/>T6: 0.75 (0.25-1.5)<br/>p=0.017</p> <p>Control: T0: 0.875 (0.4-1.2)<br/>T6: 0.875 (0.4-1.4)<br/>p=0.442</p>                                                                                                                                                                                                            | Yes      | 10; R  | Horváth, 2017 [126]          |
| <p>P: Manual therapy and physiotherapy, three weeks every year for three years</p> <p>C: N/A: intraindividual assessment</p>                                                                                            | N/A; intraindividual assessment | Intervention: 43<br>Control: N/A | <p>T0 (admission): 1.2 (0.6), T1 (discharge): 0.8 (0.6), T2: 1.3 (0.6), T3: 1.0 (0.6), T4: 1.4 (0.7), T5: 1.1(0.7)</p> <p>T0-T1: p&lt;0.0001<br/>T2-T3: p&lt;0.0001<br/>T4-T5: p&lt;0.0001</p>                                                                                                                                                                              | Yes      | 10; R  | Brignoli, 2018 [129]         |
| <b>Dietary therapy and nutrition</b>                                                                                                                                                                                    |                                 |                                  |                                                                                                                                                                                                                                                                                                                                                                             |          |        |                              |
| <p>P: Probiotics</p> <p>C: N/A: intraindividual assessment</p>                                                                                                                                                          | N/A; intraindividual assessment | Intervention: 10<br>Control: N/A | <p>Total GIT score: T0: 0.73 (0.35)<br/>T1: 0.43 (0.29)<br/>p&lt;0.01</p> <p>Effect size (ES): 0.82 (large)</p> <p>Reflux: T0: 0.74 (0.56)<br/>T1: 0.64 (0.48)<br/>p&lt;0.05</p> <p>ES: 0.18 (small)</p> <p>Bloating/distention: T0: 2.15 (0.67)<br/>T1: 0.97 (0.77)<br/>p&lt;0.01</p> <p>ES: 1.76(large)</p>                                                               | Yes      | 10; I  | Frech, 2011 [165]            |
| <p>P: Individually adapted nutritional intervention</p> <p>C: N/A: intraindividual assessment</p>                                                                                                                       | N/A; intraindividual assessment | Intervention: 9<br>Control: N/A  | NS improvement observed in all the parameters                                                                                                                                                                                                                                                                                                                               | No       | 10; I  | Ortiz-Santamaria, 2014 [166] |
| <p>P: Medical nutrition therapy</p> <p>C: N/A: intraindividual assessment</p>                                                                                                                                           | N/A; intraindividual assessment | Intervention: 18<br>Control: N/A | <p>Abridged Scored Patient-Generated Subjective Global Assessment (abPGSGA): T0: 13.1 (7.2), T1: 7.6 (5.2), p=0.01</p> <p>Lean body mass/height: T0: 5.6 (0.8), T1: 5.8 (0.8), p=0.05</p> <p>Classified as sarcopenic, No. (%): T0: 7 (54)<br/>T1: 5 (39)<br/>p=0.02</p> <p>Calorie intake, p=0.12</p> <p>Macronutrient distribution (% fat, protein, carbohydrate): NS</p> | Yes/no   | 10; I  | Doerfler, 2017 [167]         |

| Intervention/management strategy                                    | Comparator                      | N                                | Results                                                                                                                                                                                                                                                                                                                    | Efficacy | SD&OA* | Reference             |
|---------------------------------------------------------------------|---------------------------------|----------------------------------|----------------------------------------------------------------------------------------------------------------------------------------------------------------------------------------------------------------------------------------------------------------------------------------------------------------------------|----------|--------|-----------------------|
| P: Probiotics<br>C: Placebo                                         | Other SSc patients              | Intervention: 19<br>Control: 21  | Total GIT score: T1-T0:<br>Intervention -0.13 (0.07)<br>Control: -0.14 (0.06)<br>p=0.847<br>T2-T0: Intervention: -0.18 (0.07)<br>Control: -0.05 (0.06)<br>p=0.141<br>Reflux: T1-T0: Intervention: -0.10 (0.11)<br>Control: -0.10 (0.07)<br>p=0.978<br>T2-T0: Intervention: -0.22 (0.05)<br>Control: 0.05 (0.07)<br>p=0.004 | Yes/no   | 11; I  | Low, 2019 [168]       |
| P: Probiotics<br>C: Placebo                                         | Other SSc patients              | Intervention: 37<br>Control: 36  | UCLA GIT: Intervention: T0: 0.8 (0.3), T1: 0.3 (0.2)<br>Control: T0: 0.7 (0.2), T1: 0.3 (0.2)<br>P (interaction)=0.507<br>P(treatment)=0.846<br>Th17: Intervention: T0: 2.5 (1.9), T1: 1.6 (0.8)<br>Control: T0: 2.2 (1.2)<br>T1: 2.5 (2.2)<br>P(treatment)=0.003<br>NS changes in Th1,2 and Treg                          | No       | 11; W  | Marighela, 2019 [169] |
| P: Faecal microbiota transplantation<br>C: Placebo                  | Other SSc patients              | Intervention: 5<br>Control: 4    | 2 placebos had procedure-related serious adverse event (AE)-1 developed laryngospasm, 1 encountered duodenal perforation during gastroduodenoscopy<br>Decreased bloating, diarrhoea and/ or faecal incontinence was observed in 4/5 patient in the interventional group and 2/4 in the placebo group.                      | Yes/no   | 11; I  | Fretheim, 2020 [170]  |
| <b>Phototherapy and laser treatment</b>                             |                                 |                                  |                                                                                                                                                                                                                                                                                                                            |          |        |                       |
| P: Infrared A (IRA)<br>C: N/A: intraindividual assessment           | N/A; intraindividual assessment | Intervention: 58<br>Control: N/A | 6 weeks follow-up: Tau-value: 8.39 to 5.36 (95%CI: (4.44, 6.27), p<0.001). VAS RP: 1.17 to 0.94 (95%CI: (0.77, 1.10), p=0.005) = 19.7% reduction. mRSS: 12.9 - 9.8 (95%CI: (7.9, 11.8), p<0.001) = 24% reduction. DAS28: 4.2 - 3.9 (95%CI: (3.5, 4.3), p=0.021).                                                           | Yes      | 10; I  | Foerster, 2005 [171]  |
| P: Intense pulsed light (IPL)<br>C: N/A: intraindividual assessment | N/A; intraindividual assessment | Intervention: 20<br>Control: N/A | Photograph grading: 8/12 "improved" or "much improved" at both 1- and 6-month follow-up.<br>LDI (median (IQR)): Baseline: 2.66 (1.78–3.93)<br>1 month: 1.70 (1.07–2.55), p=0.006<br>6 months: 2.05 (1.42–2.36), p=0.008                                                                                                    | Yes/no   | 10; R  | Murray, 2012 [172]    |



| Intervention/management strategy                                                             | Comparator                      | N                                | Results                                                                                                                                                                                                                                                                                                                                                                                                                             | Efficacy | SD&OA* | Reference                    |
|----------------------------------------------------------------------------------------------|---------------------------------|----------------------------------|-------------------------------------------------------------------------------------------------------------------------------------------------------------------------------------------------------------------------------------------------------------------------------------------------------------------------------------------------------------------------------------------------------------------------------------|----------|--------|------------------------------|
| P: Pulsed dye laser & intense pulsed light (PDL & IPL)<br>C: N/A: intraindividual assessment | N/A; intraindividual assessment | Intervention: 19<br>Control: N/A | Dermoscopy: PDL > IPL, both p=0.01. 100% of patients experienced overall improvement with phototherapy (88% with PDL and 69% with IPL)                                                                                                                                                                                                                                                                                              | Yes      | 10; I  | Dinsdale, 2014 [173]         |
| P: Pulsed dye laser (PDL)<br>C: N/A: intraindividual assessment                              | N/A; intraindividual assessment | Intervention: 23<br>Control: N/A | Mean PDL session required to achieve clearance: 3 (range 1-7)<br>Recurrence: 2 cases recurred at 6 months, 4 cases recurred at 18-36 months<br>PDL generally well tolerated: mean Tolerance score 6.5 (on a 0-10 scale)<br>mean Satisfaction score: 8.75 (on a 0-10 scale) and 100% of patients would repeat the treatment.                                                                                                         | Yes      | 4; I   | Burillo-Martinez, 2017 [174] |
| P: Intense pulsed light (IPL)<br>C: N/A: intraindividual assessment                          | N/A; intraindividual assessment | Intervention: 15<br>Control: 5   | Increase in inter-ridge distance of 4.1 mm (95% confidence interval, 1.726–6.638, p<0.005) from baseline to six-month follow-up (after last session). No significant increase in inter-incisal distance. Subjective improvement of lip movements.                                                                                                                                                                                   | Yes/no   | 10; I  | Rosholm Comstedt, 2017 [175] |
| P: Low level light therapy (IR + red + blue)<br>C: N/A: intraindividual assessment           | N/A; intraindividual assessment | Intervention: 8<br>Control: N/A  | No safety concerns were encountered, and all the participants considered that the treatment took 'just the right amount of time' and was 'feasible'<br>VAS-reduction (patient assessment) = 7.1 units per visit (95%CI: (-8.6, -5.7), p<0.001), VAS-reduction (clinician assessment) = 5.2 units per visit (95%CI: -6.5, -3.8) (p<.001)<br>LDI: increased mean perfusion in both ulcer core and periphery (p=0.0013 & p=0.04 resp.) | Yes      | 10; R  | Hughes, 2019 [176]           |
| <b>Shockwave therapy</b>                                                                     |                                 |                                  |                                                                                                                                                                                                                                                                                                                                                                                                                                     |          |        |                              |
| P: ESWT with pressure pulses<br>C: N/A: intraindividual assessment                           | N/A; intraindividual assessment | Intervention: 30<br>Control: N/A | RSS improvement after 1st sitting and remained until after 30d, p<0.05<br>VAS improved after 1st sitting and remained after 90d, p<0.05<br>No differences in skin thickness<br>CECs and EPCs increased after 1st sitting, p<0.05<br>Biochemical markers showed no variation before and after treatment                                                                                                                              | Yes      | 10; I  | Tinazzi, 2011 [177]          |

| Intervention/management strategy                                                                                   | Comparator                      | N                                | Results                                                                                                                                                                                                                                                                                                                                                                         | Efficacy | SD&OA* | Reference              |
|--------------------------------------------------------------------------------------------------------------------|---------------------------------|----------------------------------|---------------------------------------------------------------------------------------------------------------------------------------------------------------------------------------------------------------------------------------------------------------------------------------------------------------------------------------------------------------------------------|----------|--------|------------------------|
| P: ESWT<br>C: N/A: intraindividual assessment                                                                      | N/A; intraindividual assessment | Intervention: 8<br>Control: N/A  | After first ESWT session, VEGF and vWF significantly decreased, (p=0.007 and p=0.004 respectively) but remained stable thereafter. At end of intervention, there were no changes in total RSS, RSS at fingers was significantly reduced (p=0.018) and durometer analysis showed significant decrease at finger-pads and at treated forearm (p<0.0001 and p=0.021 respectively). | Yes      | 10; I  | Belloli, 2013 [178]    |
| P: ESWT for digital ulcers in SSC<br>C: Usual care                                                                 | Other SSC patients              | Intervention: 9<br>Control: 14   | ESWT group: No. of ulcer decreased from 5.8 (baseline) to 1.2 (week 8)<br>Conventional treatment alone: mean no. of ulcer increased from 3.1 (baseline) to 3.8 (week 8).                                                                                                                                                                                                        | Yes      | 10; I  | Saito, 2016 [179]      |
| P: ESWT for digital ulcers in SSC<br>C: N/A: intraindividual assessment                                            | N/A; intraindividual assessment | Intervention: 9<br>Control: N/A  | Ulcers showed signs of healing after 1 session, and no. decreased from 5.4 to 1.1 at 9 weeks<br>Mean size of ulcers decreased from 10.9 to 2.5 mm at 20 weeks<br>Average improvement on HAQ, EQ-5D and PainVision system was observed                                                                                                                                           | Yes      | 10; I  | Saito, 2016 [180]      |
| <b>Healthcare models</b>                                                                                           |                                 |                                  |                                                                                                                                                                                                                                                                                                                                                                                 |          |        |                        |
| P: Customized intervention for dental hygiene and upper extremity's function<br>C: N/A: intraindividual assessment | N/A; intraindividual assessment | Intervention: 17<br>Control: N/A | Patient hygiene performance index (PHP): T0 vs T2: p<0.05<br>No. of sites bleeding on probing: T1 vs T2: p<0.05<br>No. of teeth with supragingival calculus: T0 vs T2 and T1 vs T2: p<0.05<br>No differences in any upper extremity measures or oral aperture                                                                                                                   | Yes      | 10; I  | Poole, 2010 [181]      |
| P: Multidisciplinary disease management programme<br>C: N/A: intraindividual assessment                            | N/A; intraindividual assessment | Intervention: 41<br>Control: N/A | ICQ (helplessness): T0: 13.1 (4.2)<br>T1: -1.24 (-2.27, -0.22), ES=-0.32<br>T2: -1.05 (-2.03, -0.08), ES: -0.26<br>p=0.02<br>Acceptance of limitations: T0: 29 (4.9)<br>T1: -1.60 (-3.22, 0.02), ES:-0.28<br>T2: -2.24 (-3.73, -0.75), ES: -0.44<br>p=0.01<br>Other parameters such as VAS, HAQ DI, IRGL showed NS.                                                             | Yes/no   | 10; R  | Kwakkenbos, 2011 [145] |

| Intervention/management strategy                                                                                   | Comparator                      | N                                | Results                                                                                                                                                                                                                                                                                                                                                                                                                                                 | Efficacy | SD&OA* | Reference              |
|--------------------------------------------------------------------------------------------------------------------|---------------------------------|----------------------------------|---------------------------------------------------------------------------------------------------------------------------------------------------------------------------------------------------------------------------------------------------------------------------------------------------------------------------------------------------------------------------------------------------------------------------------------------------------|----------|--------|------------------------|
| P: Multidisciplinary team care<br>C: Usual care                                                                    | Other SSC patients              | Intervention: 28<br>Control: 25  | At T1: improvement in grip strength (2.2 vs -1.8kg, p=0.001), MMO (1.4 vs -0.9mm, p=0.011), 6MWD (42.8 vs 3.9m, p=0.021), HAQ (-0.18 vs 0.13, p=0.025) in the intervention group<br>At T2: effect of grip strength persisted.                                                                                                                                                                                                                           | Yes      | 11; I  | Schouffoer, 2011 [182] |
| <b>Hyperbaric oxygen or ozone therapy</b>                                                                          |                                 |                                  |                                                                                                                                                                                                                                                                                                                                                                                                                                                         |          |        |                        |
| P: Hyperbaric oxygen therapy<br>C: N/A: intraindividual assessment                                                 | N/A; intraindividual assessment | Intervention: 6<br>Control: N/A  | Mean no. of session to achieve healing was 41 (range 30-60), 53 for DU and 28 for lower extremity ulcer (LU)<br>4 patients healed completely, 2 patients had near-complete healing<br>Amputation was not required for any                                                                                                                                                                                                                               | Yes/no   | 4; I   | Mirasoglu, 2017 [183]  |
| P: Oxygen-ozone therapy<br>C: Usual care                                                                           | Other SSC patients              | Intervention: 25<br>Control: 25  | Grading of DU healing: intervention vs control: 96% (24/25) vs 44% (11/25), $\chi^2=7.26$ , p=0.007<br>After treatment, significant reduction of wound size is observed in intervention vs control, 0.75 (0.3 vs 2.44 (0.8), p<0.001<br>VEGF higher in intervention, 83.96 (9.7) vs 67.9 (6.55), p<0.001<br>ETAR lower in intervention, 3.1 (1.1) vs 4.6 (1.2), p<0.001                                                                                 | Yes      | 11; W  | Hassanien, 2018 [184]  |
| P: Ozone bath, 2 series of 10 days per series with 10 days apart<br>C: N/A: intraindividual assessment             | N/A; intraindividual assessment | Intervention: 42<br>Control: N/A | Mean concentration (conc.) of IL-2sR decreased significantly from 1563.73 to 1249.86pg/ml, p=0.02<br>Mean conc. of neopterin decreased significantly from 12.06 to 10.9 nmol/ml, p=0.012<br>Absolute monocytosis decreased insignificantly from 1.694 to 1.480g/l, p=0.2<br>Correlations between the disease duration and conc. of IL-2sR were weak and negative, while between disease duration and concentration of neopterin were weak and positive. | Yes      | 10; I  | Nowicka, 2019 [155]    |
| <b>Oral hygiene</b>                                                                                                |                                 |                                  |                                                                                                                                                                                                                                                                                                                                                                                                                                                         |          |        |                        |
| P: Customized intervention for dental hygiene and upper extremity's function<br>C: N/A: intraindividual assessment | N/A; intraindividual assessment | Intervention: 17<br>Control: N/A | Patient hygiene performance index (PHP): T0 vs T2: p<0.05<br>No. of sites bleeding on probing: T1 vs T2: p<0.05<br>No. of teeth with supragingival calculus: T0 vs T2 and T1 vs T2: p<0.05<br>No differences in any upper extremity measures or oral aperture                                                                                                                                                                                           | Yes      | 10; I  | Poole, 2010 [181]      |

| Intervention/management strategy                                                                                                                                   | Comparator                      | N                                             | Results                                                                                                                                                                                                                                                                                                                      | Efficacy | SD&OA* | Reference          |
|--------------------------------------------------------------------------------------------------------------------------------------------------------------------|---------------------------------|-----------------------------------------------|------------------------------------------------------------------------------------------------------------------------------------------------------------------------------------------------------------------------------------------------------------------------------------------------------------------------------|----------|--------|--------------------|
| P: Multi-faceted oral health intervention<br>C: Usual care                                                                                                         | Other SSc patients              | Intervention: 26<br>Control: 22               | Reduction of gingival index (GI) in intervention: 20.8% after 6 months<br>Intervention vs Control at 6 months showed significant reduction in GI by 8%, p=0.0007.                                                                                                                                                            | Yes      | 11; W  | Yuen, 2011 [121]   |
| P: Xylitol chewing gum<br>C: Xylitol mouth rinse                                                                                                                   | Other SSc patients              | Intervention: 6<br>Control: 7                 | MS score changes: After 10 mins chewing gum/ 2 mins mouth rinse: Intervention: 0.67 (0.82)<br>Control: 0.00 (0.82) p=0.18<br>25 mins post xylitol exposure: Intervention: 0.33 (1.03)<br>Control: -0.14 (0.69) p=0.45                                                                                                        | No       | 11; I  | Yuen, 2012 [185]   |
| <b>Others</b>                                                                                                                                                      |                                 |                                               |                                                                                                                                                                                                                                                                                                                              |          |        |                    |
| P: Autologous fat transplantation, two times three months apart<br>C: N/A: intraindividual assessment                                                              | N/A; intraindividual assessment | Intervention: 10<br>Control: N/A              | IVMHSS: Intervention T1 vs T0: p=0.0234, t: 2.794<br>Control: p=0.0022 t=4.445<br>Improvement between groups: p=0.962 t=0.049<br>MMO: Intervention T1 vs T0: p=0.017, t=2.999<br>Control: p=0.032, t=2.587<br>Difference of improvement between groups: p=0.5833 t=0.559<br>VAS difference between groups: p=0.034, t=2.556. | Yes      | 4; I   | Onesti, 2016 [186] |
| P: Neuromuscular taping<br>C: N/A: intraindividual assessment                                                                                                      | N/A; intraindividual assessment | Intervention: 53<br>Control: N/A              | CHFDS: T0/T4: p=0.000<br>T4-T0: p=0.000<br>T1-T0: p=0.000<br>HAMIS: T0/T4: p=0.000<br>T4-T0: p=0.31<br>T1-T0: p=0.000<br>VAS: T0/T4: p=0.000<br>T4-T0: p=0.000<br>T1-T2: p=0.000                                                                                                                                             | Yes      | 10; I  | Parisi, 2017 [187] |
| P: Animal-assisted intervention session with multidisciplinary team, weekly for 20 weeks<br>C:<br>C1: alternative social activity (cooking)<br>C2: No intervention | Other SSc patients              | Intervention: 14<br>Control: C1: 14<br>C2: 14 | Animal-assisted intervention (AAI) showed significant decrease of anxiety level compare to C1 & C2, p<0.001<br>VAS lower in AAI p<0.001 and C1 p<0.01<br>STAI-T and TAS reduced in AAI p<0.001                                                                                                                               | Yes      | 10; I  | Fiori, 2018 [188]  |

| Intervention/management strategy                                                         | Comparator                      | N                               | Results                                                                                                                                                                                                                                                                                                                                                | Efficacy | SD&OA* | Reference         |
|------------------------------------------------------------------------------------------|---------------------------------|---------------------------------|--------------------------------------------------------------------------------------------------------------------------------------------------------------------------------------------------------------------------------------------------------------------------------------------------------------------------------------------------------|----------|--------|-------------------|
| P: Application of amniotic membrane to skin ulcers<br>C: N/A: intraindividual assessment | N/A; intraindividual assessment | Intervention: 6<br>Control: N/A | 3 patients with digital ulcer had complete healing in 1-3 weeks<br>2 with elbow ulcers healed in 7-9 weeks<br>1 with shin ulcer healed in 21 weeks<br>1 patient required a repeat application for a reoccurrence after 2 months<br><br>All patients reported pain relief with this type of dressing which was not registered by a formal rating scale. | Yes      | 10; I  | Frech, 2019 [189] |

\*Study design and overall appraisal (adapted from the Joanna Briggs Institute Manual for Evidence Synthesis [190]):

| Notation | Study design                                     |
|----------|--------------------------------------------------|
| 1        | Analytical cross-sectional study                 |
| 2        | Case-control study                               |
| 3        | Case report                                      |
| 4        | Case series                                      |
| 5        | Cohort study                                     |
| 6        | Diagnostic test accuracy study                   |
| 7        | Economic evaluation                              |
| 8        | Prevalence study                                 |
| 9        | Qualitative research                             |
| 10       | Quasi-experimental study                         |
| 11       | Randomised controlled trial                      |
| 12       | Meta-analysis, with or without systematic review |

| Notation | Overall appraisal |
|----------|-------------------|
| R        | Robust            |
| I        | Intermediate      |
| W        | Weak              |

#### Abbreviations:

6MWT: 6 minutes walking test; abPGSGA: Abridged Scored Patient-Generated Subjective Global Assessment; AC: acupuncture; ADL: activities in daily living; ANA: anti-nuclear antibody; aPL: antiphospholipid; AUC: area under the curve; BASS: Body Area Satisfaction Scale; BDI: Beck Depression Inventory; BF: breathing frequency; BF/CBT: Biofeedback-assisted cognitive-behavioural treatment; BMD: bone mineral density; BMI: body mass index; BP: bodily pain; BPI: Brief Pain Inventory; C: intervention/management strategy for the comparator group C3: complement component 3; C4: complement component 4; CASE: Children's Arthritis Self-Efficacy scale; CAT: complementary and alternative therapies; CC: calcinosis cutis; CCL4: chemokine (C-C motif) ligands 4; CECs: circulating endothelial cells; CES-D: Center for Epidemiological Studies-Depression; CT: cardiovascular training; CI: confidence interval; CLASI: cutaneous lupus erythematosus disease area and severity index; CRP: C-reactive protein; DAS28: Disease Activity Score-28; DASH: Disabilities of the Arm, Shoulder and Hand; DHA: docosahexaenoic acid; dsDNA: double-stranded DNA; DU: digital ulcers; ECLAM: European Consensus Lupus Activity Measurement; EPA: eicosapentaenoic acid; EPCs: endothelial progenitor cells; ER admission: emergency room admission; ES: effect size; ESR: erythrocyte sedimentation rate; ESWT: extracorporeal shock wave therapy; FACIT: Functional Assessment of Chronic Illness Therapy; FISI: Fecal Incontinence Severity Index; FMD: flow-mediated dilation; FSS: Fatigue Severity Scale; GFR: glomerular filtration rate; GH: general health; GHQ: General Health Questionnaire; GI: gingival index; GIT score: gastrointestinal tract score; HADS: Hospital Anxiety and Depression Scale; HAMIS: Hand Mobility in

Scleroderma; HAQ: Health Assessment Questionnaire; HAQ-DI: HAQ-Disability Index; HDL: high-density lipoprotein; HeiQ: Health Education Impact Questionnaire; Hg: mercury; HOMA IR: Homeostatic Model Assessment for Insulin Resistance; HR: hazard ratio; HR: heart rate; HRQoL: health-related quality of life; hsCRP: high sensitivity C-reactive protein; IFN: interferon; Ig: immunoglobulin; IID: interincisal distance; IL: interleukin; IPL: intense pulsed light; IQR: interquartile range; IRR: incidence rate ratio; ITT: intention-to-treat; LDl: laser Doppler imaging; LDL: low-density lipoprotein; LE: lupus erythematosus; Lstren: lip strength; MN: minimal needling; MASRI: Medication Adherence Self-Report Inventory; MCID: minimal clinically important difference; METS: metabolic equivalent of task; MH: mental health; MHAQ: Modified Health Assessment Questionnaire; MHISS: Mouth Handicap in Systemic Sclerosis; MI-RSWB: Multidimensional Inventory of Religious/Spiritual Well-Being; MMO: maximal mouth opening; MPO: Myeloperoxidase; MPR: medication possession ratio; mRSS: modified Rodnan Skin Score; MSI: Mental Synthetic Index; MUFA: monounsaturated fatty acids; MxA: myxovirus protein A; Ns: not significant; OCT: optical coherence tomography; P: intervention/management strategy for the population under investigation; PCS: mental component summary; PDL: pulsed-dye laser; PETCO2: end-tidal carbon dioxide pressure; PF: physical functioning; PGA: Physician Global Assessment; PH: physical health; PHP: Patient Hygiene Performance; PROMIS: Patient-Reported Outcomes Measurement Information System; PSI: Physical Synthetic Index; PSQ: Perceived Severity of Stress Questionnaire; PSQI: Pittsburgh Sleep Quality Index; PSS: Perceived Stress Scale; PtGA: Patient Global Assessment; PUFA: polyunsaturated fatty acids; PUVA: psoralen and ultraviolet A; PWC75%/kg: physical working capacity measured at 75% of the predicted maximal heart rate; RCP: respiratory compensation point; RCT: randomised clinical trial; RNP: ribonucleoprotein; ROM: range of motion; RP: role physical; RR: relative risk; RSE: Rosenberg Self-Esteem Scale; RT: resistance training; SDI: SLICC/ACR Damage Index; SE scale: Chronic Disease Self-Efficacy Scale; SEF: second self-efficacy for performing functions; SEOS: Self-Efficacy for controlling Other Symptoms; SEP: Self-Efficacy Perception for controlling pain; SF-36: short-form 36; SF-MPQ: Short-Form McGill Pain Questionnaire; SFA: saturated fatty acids; SFAQ: Scleroderma Functional Assessment Questionnaire; SGRQ: St. George's Respiratory Questionnaire; SIBID: Situational Inventory of Body Image Dysphoria; sICAM: soluble intracellular cellular adhesion molecule; SLAM: Systemic Lupus Activity Measure; SLAQ: Systemic Lupus Activity Questionnaire; SLE: systemic lupus erythematosus; SLEDAI: Systemic Lupus Erythematosus Disease Activity Index; Sm: Smith; SM: Social media; SMILEY: Simple Measure of the Impact of Lupus Erythematosus in Youngsters; SMS: Symptom-monitoring Support; SSC: systemic sclerosis; SGLSS: Scleroderma Support Group Leader Self-efficacy Scale; Std: standard; sTNFR: soluble tumour necrosis factor receptor; taVNS: Transcutaneous auricular vagus nerve stimulation; TCM: traditional Chinese medicine; TE: expiratory time; TG: triglycerides; TI: inspiratory time; TLR: toll-like receptor; TNF: tumour necrosis factor; TOT: total respiratory time; Tprot: tongue protrusion; Tstren: tongue strength; TUG: Timed Up and Go; UC: usual care; UCLA GIT: University of California Los Angeles Scleroderma Clinical Trials Consortium Gastrointestinal Tract; UVA1: ultraviolet A1; VAS: visual analogue scale; VAT: ventilatory anaerobic threshold; VE/VC02: ventilatory equivalent for carbon dioxide; VLDL: very low-density lipoprotein; VO2 max: maximal oxygen consumption; VT: tidal volume; VT: vitality; W: week; WHOQOL: World Health Organization Quality of Life Instrument.

**References:**

- Ramsey-Goldman R, Schilling EM, Dunlop D, Langman C, Greenland P, Thomas RJ, et al. A pilot study on the effects of exercise in patients with systemic lupus erythematosus. *Arthritis Care & Research*. 2000 2000; 13(5):262-269.
- Tench CM, McCarthy J, McCurdie I, White PD, D'Crux DP. Fatigue in systemic lupus erythematosus: a randomized controlled trial of exercise. *Rheumatology*. 2003 2003; 42(9):1050-1054.
- Carvalho MR, Sato EI, Tebexreni AS, Heidecher RT, Schenkman S, Neto TL. Effects of supervised cardiovascular training program on exercise tolerance, aerobic capacity, and quality of life in patients with systemic lupus erythematosus. *Arthritis & Rheumatism*. 2005 2005; 53(6):838-844.
- Clarke-Jenssen AC, Fredriksen PM, Lilleby V, Mengshoel AM. Effects of supervised aerobic exercise in patients with systemic lupus erythematosus: a pilot study. *Arthritis & Rheumatism*. 2005 2005; 53(2):308-312.
- do Prado DM, Gualano B, Miozzi R, Lima FR, Roschel H, Borba E, et al. Erratic control of breathing during exercise in patients with systemic lupus erythematosus: a pilot-study. *Lupus*. 2011 2011; 20(14):1535-1540.
- Otto AD, Mishler AE, Shah N, Krug MM, Phillips A, Wilson N, et al. Feasibility of Implementing a Lifestyle Intervention in Overweight and Obese Patients with Systemic Lupus Erythematosus. *Medicine & Science in Sports & Exercise*. 2011 2011; 43:123-123.
- Yuen HK, Holthaus K, Kamen DL, Sword DO, Breland HL. Using Wii Fit to reduce fatigue among African American women with systemic lupus erythematosus: a pilot study. *Lupus*. 2011 2011; 20(12):1293-1299.
- Miozzi R, Benatti FB, Lucide de Sa Pinto A, Lima FR, Borba EF, Prado DM, et al. Using exercise training to counterbalance chronotropic incompetence and delayed heart rate recovery in systemic lupus erythematosus: a randomized trial. *Arthritis care & research*. 2012 2012; 64(8):1159-1166.
- da Silva AE, dos Reis-Neto ET, da Silva NP, Sato EI. The effect of acute physical exercise on cytokine levels in patients with systemic lupus erythematosus. *Lupus*. 2013 2013; 22(14):1479-1483.
- dos Reis-Neto ET, da Silva AE, Monteiro CM, de Camargo LM, Sato EI. Supervised physical exercise improves endothelial function in patients with systemic lupus erythematosus. *Rheumatology*. 2013 2013; 52(12):2187-2195.
- Barnes JN, Nualnim N, Dhindsa M, Renzi CP, Tanaka H. Macro- and microvascular function in habitually exercising systemic lupus erythematosus patients. *Scandinavian Journal of Rheumatology*. 2014 2014; 43(3):209-216.
- Perandini LA, Sales-de-Oliveira D, Mello SB, Camara NO, Benatti FB, Lima FR, et al. Exercise training can attenuate the inflammatory milieu in women with systemic lupus erythematosus. *Journal of Applied Physiology*. 2014 2014; 117(6):639-647.
- Benatti FB, Miozzi R, Passarelli M, Nakandakare ER, Perandini L, Lima FR, et al. The effects of exercise on lipid profile in systemic lupus erythematosus and healthy individuals: a randomized trial. *Rheumatology International*. 2015 2015; 35(1):61-69.
- Bogdanovic G, Stojanovich L, Djokovic A, Stanislavljevic N. Physical Activity Program Is Helpful for Improving Quality of Life in Patients with Systemic Lupus Erythematosus. *Tohoku Journal of Experimental Medicine*. 2015 2015; 237(3):193-199.
- Perandini LA, Sales-de-Oliveira D, Mello S, Camara NO, Benatti FB, Lima FR, et al. Inflammatory cytokine kinetics to single bouts of acute moderate and intense aerobic exercise in women with active and inactive systemic lupus erythematosus. *Exercise Immunology Review*. 2015 2015; 21:174-185.
- Abraham MI, Gomiero AB, Peccin MS, Grande AJ, Trevisani VF. Cardiovascular training vs. resistance training for improving quality of life and physical function in patients with systemic lupus erythematosus: a randomized controlled trial. *Scandinavian Journal of Rheumatology*. 2016 2016; 45(3):197-201.
- Avaux M, Hoellinger P, Nieuwland-Husson S, Fraselle V, Depresseux G, Houssiau FA. Effects of two different exercise programs on chronic fatigue in lupus patients. *Acta Clinica Belgica*. 2016 2016; 71(6):403-406.
- Bostrom C, Elfving B, Dupre B, Opava CH, Lundberg IE, Jansson E. Effects of a one-year physical activity programme for women with systemic lupus erythematosus - a randomized controlled study. *Lupus*. 2016 2016; 25(6):602-616.
- Perandini LA, Sales-de-Oliveira D, Almeida DC, Azevedo H, Moreira-Filho CA, Cenedeze MA, et al. Effects of acute aerobic exercise on leukocyte inflammatory gene expression in systemic lupus erythematosus. *Exercise Immunology Review*. 2016 2016; 22:64-81.

20. O'Dwyer T, Durcan L, Wilson F. Exercise and physical activity in systemic lupus erythematosus: A systematic review with meta-analyses. *Seminars in Arthritis & Rheumatism*. 2017 2017; 47(2):204-215.
21. Wu ML, Yu KH, Tsai JC. The Effectiveness of Exercise in Adults With Systemic Lupus Erythematosus: A Systematic Review and Meta-Analysis to Guide Evidence-Based Practice. *Worldviews on Evidence-Based Nursing*. 2017 2017; 14(4):306-315.
22. Benatti FB, Miyake CNH, Dantas WS, Zambelli VO, Shinjo SK, Pereira RMR, et al. Exercise Increases Insulin Sensitivity and Skeletal Muscle AMPK Expression in Systemic Lupus Erythematosus: A Randomized Controlled Trial. *Frontiers in Immunology*. 2018 2018; 9:906.
23. Middleton KR, Haaz Moonaz S, Hasni SA, Magana Lopez M, Tataw-Ayuketah G, Farmer N, et al. Yoga for systemic lupus erythematosus (SLE): Clinician experiences and qualitative perspectives from students and yoga instructors living with SLE. *Complementary Therapies in Medicine*. 2018 2018; 41:111-117.
24. Soriano-Maldonado A, Morillas-de-Laguno P, Sabio JM, Gavilan-Carrera B, Rosales-Castillo A, Montalban-Mendez C, et al. Effects of 12-week Aerobic Exercise on Arterial Stiffness, Inflammation, and Cardiorespiratory Fitness in Women with Systemic LUPUS Erythematosus: Non-Randomized Controlled Trial. *Journal of Clinical Medicine*. 2018 2018; 7(12):24.
25. Timoteo RP, Silva AF, Micheli DC, Candido Murta EF, Freire M, Teodoro RB, et al. Increased flexibility, pain reduction and unaltered levels of IL-10 and CD11b + lymphocytes in patients with systemic lupus erythematosus were associated with kinesiotherapy. *Lupus*. 2018 2018; 27(7):1159-1168.
26. da Hora TC, Lima K, Maciel R. The effect of therapies on the quality of life of patients with systemic lupus erythematosus: a meta-analysis of randomized trials. *Advances in Rheumatology*. 2019 2019; 59(1):34.
27. Sheikh SZ, Kaufman K, Gordon BB, Hicks S, Love A, Walker J, et al. Evaluation of the self-directed format of Walk With Ease in patients with systemic lupus erythematosus: the Walk-SLE Pilot Study. *Lupus*. 2019 2019; 28(6):764-770.
28. Wu ML, Tsai JC, Yu KH, Chen JJ. Effects of physical activity counselling in women with systemic lupus erythematosus: A randomized controlled trial. *International Journal of Nursing Practice*. 2019 2019; 25(5):e12770.
29. Gavilan-Carrera B, Vargas-Hitos JA, Morillas-de-Laguno P, Rosales-Castillo A, Sola-Rodriguez S, Callejas-Rubio JL, et al. Effects of 12-week aerobic exercise on patient-reported outcomes in women with systemic lupus erythematosus. *Disability & Rehabilitation*. 2020 2020:1-9.
30. Keramiotou K, Anagnostou C, Kataxaki E, Galanos A, Sfrikakis PP, Tektonidou MG. The impact of upper limb exercise on function, daily activities and quality of life in systemic lupus erythematosus: a pilot randomised controlled trial. *RMD Open*. 2020 2020; 6(1):01.
31. Dionello CF, Souza PL, Rosa PV, Santana A, Marchon R, Morel DS, et al. Acute Neuromuscular Responses to Whole-Body Vibration of Systemic Lupus Erythematosus Individuals: A Randomized Pilot Study. *Applied Sciences-Basel*. 2021 2021; 11(1).
32. Kao VP, Wen HJ, Pan YJ, Pai CS, Tsai ST, Su KY. Combined aerobic and resistance training improves physical and executive functions in women with systemic lupus erythematosus. *Lupus*. 2021 2021; 30(6):946-955.
33. Lopes-Souza P, Dionello CF, Bernardes-Oliveira CL, Moreira-Marconi E, Marchon RM, Teixeira-Silva Y, et al. Effects of 12-week whole-body vibration exercise on fatigue, functional ability and quality of life in women with systemic lupus erythematosus: A randomized controlled trial. *Journal of Bodywork and Movement Therapies*. 2021 2021; 27:191-199.
34. Patterson SL, Trupin L, Yazdany J, Dall'Era M, Lanata C, Dequattro K, et al. Physical Inactivity Independently Predicts Incident Depression in a Multi-Racial/Ethnic Systemic Lupus Cohort. *Arthritis care & research*. 2021 2021; 9:09.
35. Sohng KY. Effects of a self-management course for patients with systemic lupus erythematosus. *Journal of Advanced Nursing*. 2003 2003; 42(5):479-486.
36. Brown SJ, Somerset ME, McCabe CS, McHugh NJ. The impact of group education on participants' management of their disease in lupus and scleroderma. *Musculoskeletal Care*. 2004 2004; 2(4):207-217.
37. Harrison MJ, Morris KA, Horton R, Toglia J, Barsky J, Chait S, et al. Results of intervention for lupus patients with self-perceived cognitive difficulties. *Neurology*. 2005 2005; 65(8):1325-1327.
38. Miljeteig K, Graue M. Evaluation of a multidisciplinary patient education program for people with systemic lupus erythematosus. *Journal of Nursing & Healthcare of Chronic Illnesses*. 2009 2009; 1(1):87-95.
39. Drenkard C, Dunlop-Thomas C, Easley K, Bao G, Brady T, Lim SS. Benefits of a self-management program in low-income African-American women with systemic lupus erythematosus: results of a pilot test. *Lupus*. 2012 2012; 21(14):1586-1593.
40. Ganachari MS, Almas SA. Evaluation of clinical pharmacist mediated education and counselling of systemic lupus erythematosus patients in tertiary care hospital. *Indian Journal of Rheumatology*. 2012 2012; 7(1):7-12.
41. Ting TV, Kudalkar D, Nelson S, Cortina S, Pendl J, Budhani S, et al. Usefulness of cellular text messaging for improving adherence among adolescents and young adults with systemic lupus erythematosus. *Journal of Rheumatology*. 2012 2012; 39(1):174-179.
42. Williams EM, Bruner L, Penfield M, Kamen D, Oates JC. Stress and Depression in Relation to Functional Health Behaviors in African American Patients with Systemic Lupus Erythematosus. *Rheumatology (Sunnyvale)*. 2014; 2014(Suppl 4).
43. Zhang X, Tian Y, Li J, Zhao X. Effect of targeted nursing applied to SLE patients. *Experimental & Therapeutic Medicine*. 2016 2016; 11(6):2209-2212.
44. O'Riordan R, Doran M, Connolly D. Fatigue and Activity Management Education for Individuals with Systemic Lupus Erythematosus. *Occupational Therapy International*. 2017 2017; 2017:4530104.
45. Yelnik CM, Richey M, Haiduc V, Everett S, Zhang M, Erkan D. Cardiovascular Disease Prevention Counseling Program for Systemic Lupus Erythematosus Patients. *Arthritis care & research*. 2017 2017; 69(8):1209-1216.
46. Kusnanto K, Sari N, Harmayetty H, Efendi F, Gunawan J. Self-care model application to improve self-care agency, self-care activities, and quality of life in patients with systemic lupus erythematosus. *Journal of Taibah University Medical Sciences*. 2018 2018; 13(5):472-478.
47. Scalzi LV, Hollenbeak CS, Mascuilli E, Olsen N. Improvement of medication adherence in adolescents and young adults with SLE using web-based education with and without a social media intervention, a pilot study. *Pediatric Rheumatology Online Journal*. 2018 2018; 16(1):18.
48. Williams EM, Hyer JM, Viswanathan R, Faith TD, Voronca D, Gebregziabher M, et al. Peer-to-Peer Mentoring for African American Women With Lupus: A Feasibility Pilot. *Arthritis care & research*. 2018 2018; 70(6):908-917.
49. Williams EM, Dismuke CL, Faith TD, Smalls BL, Brown E, Oates JC, et al. Cost-effectiveness of a peer mentoring intervention to improve disease self-management practices and self-efficacy among African American women with systemic lupus erythematosus: analysis of the Peer Approaches to Lupus Self-management (PALS) pilot study. *Lupus*. 2019 2019; 28(8):937-944.
50. Harry O, Crosby LE, Mara C, Ting TV, Huggins JL, Modi AC. Feasibility and acceptability of an innovative adherence intervention for young adults with childhood-onset systemic Lupus Erythematosus. *Pediatric Rheumatology Online Journal*. 2020 2020; 18(1):36.
51. Kankaya H, Karadakovan A. Effects of web-based education and counselling for patients with systemic lupus erythematosus: self-efficacy, fatigue and assessment of care. *Lupus*. 2020 Jul; 29(8):884-891.
52. Khan F, Granville N, Malkani R, Chathampally Y. Health-Related Quality of Life Improvements in Systemic Lupus Erythematosus Derived from a Digital Therapeutic Plus Tele-Health Coaching Intervention: Randomized Controlled Pilot Trial. *J Med Internet Res*. 2020 Oct 20; 22(10):e23868.
53. Allen KD, Beauchamp T, Rini C, Keefe FJ, Bennell KL, Cleveland RJ, et al. Pilot study of an internet-based pain coping skills training program for patients with systemic Lupus Erythematosus. *BMC Rheumatol*. 2021 Jun 17; 5(1):20.



54. White AA, Ba A, Faith TD, Ramakrishnan V, Dismuke-Greer CL, Oates JC, et al. The Care-coordination Approach to Learning Lupus Self-Management: a patient navigator intervention for systemic lupus inpatients. *Lupus Science & Medicine*. 2021 2021; 8(1).
55. Dobkin PL, Da Costa D, Joseph L, Fortin PR, Edworthy S, Barr S, et al. Counterbalancing patient demands with evidence: results from a pan-Canadian randomized clinical trial of brief supportive-expressive group psychotherapy for women with systemic lupus erythematosus. *Annals of Behavioral Medicine*. 2002 2002; 24(2):88-99.
56. Edworthy SM, Dobkin PL, Clarke AE, Da Costa D, Drits M, Fortin PR, et al. Group psychotherapy reduces illness intrusiveness in systemic lupus erythematosus. *Journal of Rheumatology*. 2003 2003; 30(5):1011-1016.
57. Greco CM, Rudy TE, Manzi S. Effects of a stress-reduction program on psychological function, pain, and physical function of systemic lupus erythematosus patients: a randomized controlled trial. *Arthritis & Rheumatism*. 2004 2004; 51(4):625-634.
58. Karlson EW, Liang MH, Eaton H, Huang J, Fitzgerald L, Rogers MP, et al. A randomized clinical trial of a psychoeducational intervention to improve outcomes in systemic lupus erythematosus. *Arthritis & Rheumatism*. 2004 2004; 50(6):1832-1841.
59. Goodman D, Morrissey S, Graham D, Bossingham D. The application of cognitive-behaviour therapy in altering illness representations of systemic lupus erythematosus. *Behaviour Change*. 2005 2005; 22(3):156-171.
60. Haupt M, Millen S, Janner M, Falagan D, Fischer-Betz R, Schneider M. Improvement of coping abilities in patients with systemic lupus erythematosus: a prospective study. *Annals of the Rheumatic Diseases*. 2005 2005; 64(11):1618-1623.
61. Ng P, Chan W. Group psychosocial program for enhancing psychological well-being of people with systemic lupus erythematosus. *Journal of Social Work in Disability & Rehabilitation*. 2007 2007; 6(3):75-87.
62. Navarrete-Navarrete N, Peralta-Ramirez MI, Sabio-Sanchez JM, Coin MA, Robles-Ortega H, Hidalgo-Tenorio C, et al. Efficacy of cognitive behavioural therapy for the treatment of chronic stress in patients with lupus erythematosus: a randomized controlled trial. *Psychotherapy & Psychosomatics*. 2010 2010; 79(2):107-115.
63. Navarrete-Navarrete N, Peralta-Ramirez MI, Sabio JM, Martinez-Egea I, Santos-Ruiz A, Jimenez-Alonso J. Quality-of-life predictor factors in patients with SLE and their modification after cognitive behavioural therapy. *Lupus*. 2010 2010; 19(14):1632-1639.
64. Brown RT, Shaftman SR, Tilley BC, Anthony KK, Kral MC, Maxson B, et al. The health education for lupus study: a randomized controlled cognitive-behavioral intervention targeting psychosocial adjustment and quality of life in adolescent females with systemic lupus erythematosus. *American Journal of the Medical Sciences*. 2012 2012; 344(4):274-282.
65. Zhang J, Wei W, Wang CM. Effects of psychological interventions for patients with systemic lupus erythematosus: a systematic review and meta-analysis. *Lupus*. 2012 2012; 21(10):1077-1087.
66. Jolly M, Peters KF, Mikolaitis R, Evans-Raoul K, Block JA. Body image intervention to improve health outcomes in lupus: a pilot study. *JCR: Journal of Clinical Rheumatology*. 2014 2014; 20(8):403-410.
67. Liang H, Tian X, Cao LY, Chen YY, Wang CM. Effect of psychological intervention on health-related quality of life in people with systemic lupus erythematosus: A systematic review. *International Journal of Nursing Sciences*. 2014 2014; 1(3):298-305.
68. Williams EM, Penfield M, Kamen D, Oates JC. An Intervention to Reduce Psychosocial and Biological Indicators of Stress in African American Lupus Patients: The Balancing Lupus Experiences with Stress Strategies Study. *Open J Prev Med*. 2014 Jan; 4(1):22-31.
69. Horesh D, Glick I, Taub R, Agmon-Levin N, Shoenfeld Y. Mindfulness-based group therapy for systemic lupus erythematosus: A first exploration of a promising mind-body intervention. *Complementary Therapies in Clinical Practice*. 2017 2017; 26:73-75.
70. Solati K, Mousavi M, Kheiri S, Hasanpour-Dehkordi A. The Effectiveness of Mindfulness-based Cognitive Therapy on Psychological Symptoms and Quality of Life in Systemic Lupus Erythematosus Patients: A Randomized Controlled Trial. *Oman Medical Journal*. 2017 2017; 32(5):378-385.
71. Conceição CTM, Meinão IM, Bombana JA, Sato EI. Psychoanalytic psychotherapy improves quality of life, depression, anxiety and coping in patients with systemic lupus erythematosus: a controlled randomized clinical trial. *Adv Rheumatol*. 2019 Jan 22; 59(1):4.
72. Kim HA, Seo L, Jung JY, Kim YW, Lee E, Cho SM, et al. Mindfulness-based cognitive therapy in Korean patients with systemic lupus erythematosus: A pilot study. *Complementary Therapies in Clinical Practice*. 2019 2019; 35:18-21.
73. Sahebari M, Asghari Ebrahimabad MJ, Ahmadi Shoraketokanlo A, Aghamohammadian Sharbaf H, Khodashahi M. Efficacy of Acceptance and Commitment Therapy in Reducing Disappointment, Psychological Distress, and Psychasthenia among Systemic Lupus Erythematosus (SLE) Patients. *Iranian Journal of Psychiatry*. 2019 2019; 14(2):130-136.
74. Xu HY, Teng Q, Zeng Y, Tian CP, Yang BW, Yao XL. Psychoeducational Intervention Benefits the Quality of Life of Patients with Active Systemic Lupus Erythematosus. *Journal of Nanomaterials*. 2021 2021; 2021.
75. Shah M, Kavanaugh A, Coyle Y, Adams-Huet B, Lipsky PE. Effect of a culturally sensitive cholesterol lowering diet program on lipid and lipoproteins, body weight, nutrient intakes, and quality of life in patients with systemic lupus erythematosus. *Journal of Rheumatology*. 2002 2002; 29(10):2122-2128.
76. Minami Y, Sasaki T, Arai Y, Kurisu Y, Hisamichi S. Diet and systemic lupus erythematosus: a 4 year prospective study of Japanese patients. *Journal of Rheumatology*. 2003 2003; 30(4):747-754.
77. Duffy EM, Meenagh GK, McMillan SA, Strain JJ, Hannigan BM, Bell AL. The clinical effect of dietary supplementation with omega-3 fish oils and/or copper in systemic lupus erythematosus. *Journal of Rheumatology*. 2004 2004; 31(8):1551-1556.
78. Shah M, Adams-Huet B, Kavanaugh A, Coyle Y, Lipsky P. Nutrient intake and diet quality in patients with systemic lupus erythematosus on a culturally sensitive cholesterol lowering dietary program. *Journal of Rheumatology*. 2004 2004; 31(1):71-75.
79. Aghdassi E, Morrison S, Landolt-Marticoena C, Su J, Pineau CA, Gladman D, et al. The use of micronutrient supplements is not associated with better quality of life and disease activity in Canadian patients with systemic lupus erythematosus. *J Rheumatol*. 2010 Jan; 37(1):87-90.
80. Minami Y, Hirabayashi Y, Nagata C, Ishii T, Harigae H, Sasaki T. Intakes of vitamin B6 and dietary fiber and clinical course of systemic lupus erythematosus: a prospective study of Japanese female patients. *Journal of Epidemiology*. 2011 2011; 21(4):246-254.
81. Davies RJ, Lomer MC, Yeo SI, Avloniti K, Sangle SR, D'Cruz DP. Weight loss and improvements in fatigue in systemic lupus erythematosus: a controlled trial of a low glycaemic index diet versus a calorie restricted diet in patients treated with corticosteroids. *Lupus*. 2012 2012; 21(6):649-655.
82. Elkan AC, Anania C, Gustafsson T, Jogestrand T, Hafstrom I, Frostegard J. Diet and fatty acid pattern among patients with SLE: associations with disease activity, blood lipids and atherosclerosis. *Lupus*. 2012 2012; 21(13):1405-1411.
83. Khajehdehi P, Zanjaninejad B, Aflaki E, Nazarinia M, Azad F, Malekmakan L, et al. Oral supplementation of turmeric decreases proteinuria, hematuria, and systolic blood pressure in patients suffering from relapsing or refractory lupus nephritis: a randomized and placebo-controlled study. *Journal of Renal Nutrition*. 2012 2012; 22(1):50-57.
84. Everett ST, Wolf R, Contento I, Haiduc V, Richey M, Erkan D. Short-term patient-centered nutrition counseling impacts weight and nutrient intake in patients with systemic lupus erythematosus. *Lupus*. 2015 2015; 24(12):1321-1326.
85. Shamekhi Z, Amani R, Habibbaghi Z, Namjooyan F, Ghadiri A, Saki Malehi A. A Randomized, Double-blind, Placebo-controlled Clinical Trial Examining the Effects of Green Tea Extract on Systemic Lupus Erythematosus Disease Activity and Quality of Life. *Phytotherapy Research*. 2017 2017; 31(7):1063-1071.
86. Rothman D, Khan F, Rudin V. Individualized Diet and Lifestyle Modifications Reverse Symptoms of Systemic Lupus Erythematosus. *Journal of Medical Internet Research*. 2018 2018; 20(9):21-21.



87. Pocovi-Gerardino G, Correa-Rodriguez M, Callejas-Rubio JL, Rios-Fernandez R, Martin-Amada M, Cruz-Caparros MG, et al. Beneficial effect of Mediterranean diet on disease activity and cardiovascular risk in systemic lupus erythematosus patients: a cross-sectional study. *Rheumatology*. 2021 2021; 60(1):160-169.
88. Wen CP, Fan YS, Wang XC, Li XY, Lu KD. Effect of detoxification, removing stasis and nourishing yin method on corticosteroid-induced hyperlipidemia in patients with systemic lupus erythematosus. *Chinese Journal of Integrative Medicine*. 2007 2007; 13(3):180-184.
89. Greco CM, Kao AH, Maksimowicz-McKinnon K, Glick RM, Houze M, Sereika SM, et al. Acupuncture for systemic lupus erythematosus: a pilot RCT feasibility and safety study. *Lupus*. 2008 2008; 17(12):1108-1116.
90. Alvarez-Nemegyei J, Bautista-Botello A, Davila-Velazquez J. Association of complementary or alternative medicine use with quality of life, functional status or cumulated damage in chronic rheumatic diseases. *Clinical Rheumatology*. 2009 2009; 28(5):547-551.
91. Liao YN, Liu CS, Tsai TR, Hung YC, Chang SJ, Lin HL, et al. Preliminary study of a traditional Chinese medicine formula in systemic lupus erythematosus patients to taper steroid dose and prevent disease flare-up. *Kaohsiung Journal of Medical Sciences*. 2011 2011; 27(7):251-257.
92. Linda LDZ, Zhao Xiang B, Jun Hua G, Xin Z, Yu T, Jian Chun M, et al. Chinese Herbal Medicine (Zi Shen Qing) for Mild-to-Moderate Systematic Lupus Erythematosus: A Pilot Prospective, Single-Blinded, Randomized Controlled Study. *Evidence-based Complementary & Alternative Medicine (eCAM)*. 2013 2013; 2013:1-10.
93. Stege H, Budde MA, Grether-Beck S, Krutmann J. Evaluation of the capacity of sunscreens to photoprotect lupus erythematosus patients by employing the photoprovocation test. *Photodermatology, Photoimmunology & Photomedicine*. 2000 2000; 16(6):256-259.
94. Herzinger T, Plewig G, Rocken M. Use of sunscreens to protect against ultraviolet-induced lupus erythematosus. *Arthritis & Rheumatism*. 2004 2004; 50(9):3045-3046.
95. Szegedi A, Simics E, Aleksza M, Horkay I, Gaal K, Sipka S, et al. Ultraviolet-A1 phototherapy modulates Th1/Th2 and Tc1/Tc2 balance in patients with systemic lupus erythematosus. *Rheumatology*. 2005 2005; 44(7):925-931.
96. Zahn S, Graef M, Patsinakidis N, Landmann A, Surber C, Wenzel J, et al. Ultraviolet light protection by a sunscreen prevents interferon-driven skin inflammation in cutaneous lupus erythematosus. *Experimental Dermatology*. 2014 2014; 23(7):516-518.
97. Abdul Kadir WD, Jamil A, Shaharir SS, Md Nor N, Abdul Gafor AH. Photoprotection awareness and practices among patients with systemic lupus erythematosus and its association with disease activity and severity. *Lupus*. 2018 2018; 27(8):1287-1295.
98. Ward MM, Sundaramurthy S, Lotstein D, Bush TM, Neuwelt CM, Street RL, Jr. Participatory patient-physician communication and morbidity in patients with systemic lupus erythematosus. *Arthritis Rheum*. 2003 Dec 15; 49(6):810-818.
99. Sahebalzamani M, Farahani H, Jamarani MT, Faezi ST, Moradi K, Paragomi P. Effects of a Continuous Care Model on Patients' Knowledge and Health-Related Quality of Life in Systemic Lupus Erythematosus. *Rehabilitation Nursing Journal*. 2017 2017; 42(6):E9-E18.
100. Xie X, Song Y, Yang H, Nie A, Chen H, Li JP. Effects of transitional care on self-care, readmission rates, and quality of life in adult patients with systemic lupus erythematosus: a randomized controlled trial. *Arthritis Research & Therapy*. 2018 2018; 20(1):184.
101. Zhang L, Geng S, Qian L, Ye S, Wang X, Lu G, et al. Multidisciplinary care in patients with systemic lupus erythematosus: a randomized controlled trial in China. *Int J Clin Pharm*. 2019 Oct; 41(5):1247-1255.
102. Erceg A, Bovenschen HJ, van de Kerkhof PC, de Jong EM, Seyger MM. Efficacy and safety of pulsed dye laser treatment for cutaneous discoid lupus erythematosus. *Journal of the American Academy of Dermatology*. 2009 2009; 60(4):626-632.
103. Rerknimitr P, Tekacharin N, Panchaprateep R, Wititsuwannakul J, Tangtanatakul P, Hirankarn N, et al. Pulsed-dye laser as an adjuvant treatment for discoid lupus erythematosus: a randomized, controlled trial. *Journal of Dermatological Treatment*. 2019 2019; 30(1):81-86.
104. Dorsey RR, Andresen EM, Moore TL. Health-related quality of life and support group attendance for patients with systemic lupus erythematosus. *JCR: Journal of Clinical Rheumatology*. 2004 2004; 10(1):6-9.
105. Li X, He L, Wang J, Wang M. Illness uncertainty, social support, and coping mode in hospitalized patients with systemic lupus erythematosus in a hospital in Shaanxi, China. *PLoS ONE [Electronic Resource]*. 2019 2019; 14(2):e0211313.
106. Bantornwan S, Watanapa WB, Hussarin P, Chatsiricharoenkul S, Larpparisuth N, Teerapornlertratt T, et al. Role of meditation in reducing sympathetic hyperactivity and improving quality of life in lupus nephritis patients with chronic kidney disease. *Journal of the Medical Association of Thailand*. 2014 2014; 97:S101-107.
107. Squance ML, Reeves G, Attia J, Bridgman H, Guest M. Self-reported Lupus flare: Association with everyday home and personal product exposure. *Toxicology Reports*. 2015 2015; 2:880-888.
108. Xu D, You X, Wang Z, Zeng Q, Xu J, Jiang L, et al. Chinese Systemic Lupus Erythematosus Treatment and Research Group Registry VI: Effect of Cigarette Smoking on the Clinical Phenotype of Chinese Patients with Systemic Lupus Erythematosus. *PLoS ONE [Electronic Resource]*. 2015 2015; 10(8):e0134451.
109. Abdelaziz SH, Elmetwaly OIA, Maged LA. Effect of using warm shower and warm water footbath with and without adding epsom salt on fatigue level in systemic lupus patients. *Indian Journal of Public Health Research and Development*. 2020 2020; 11(5):854-859.
110. Oliveira FAP, Santos F, Dias A, Neiva CLS, Telles RW, Lanna CCD. Cosmetic camouflage improves health-related quality of life in women with systemic lupus erythematosus and permanent skin damage: A controlled intervention study. *Lupus*. 2020 2020; 29(11):1438-1448.
111. Aranow C, Atish-Fregoso Y, Lesser M, Mackay M, Anderson E, Chavan S, et al. Transcutaneous auricular vagus nerve stimulation reduces pain and fatigue in patients with systemic lupus erythematosus: a randomised, double-blind, sham-controlled pilot trial. *Annals of the Rheumatic Diseases*. 2021 2021; 80(2):203-208.
112. Pizzo G, Scardina GA, Messina P. Effects of a nonsurgical exercise program on the decreased mouth opening in patients with systemic scleroderma. *Clinical Oral Investigations*. 2003 2003; 7(3):175-178.
113. Sandqvist G, Akesson A, Eklund M. Evaluation of paraffin bath treatment in patients with systemic sclerosis. *Disability & Rehabilitation*. 2004 2004; 26(16):981-987.
114. Mugii N, Hasegawa M, Matsushita T, Kondo M, Orito H, Yanaba K, et al. The efficacy of self-administered stretching for finger joint motion in Japanese patients with systemic sclerosis. *Journal of Rheumatology*. 2006 2006; 33(8):1586-1592.
115. Antonioli CM, Bua G, Frige A, Prandini K, Radici S, Scarsi M, et al. An individualized rehabilitation program in patients with systemic sclerosis may improve quality of life and hand mobility. *Clinical Rheumatology*. 2009 2009; 28(2):159-165.
116. Bongli SM, Del Rosso A, Galluccio F, Sigismondi F, Miniati I, Conforti ML, et al. Efficacy of connective tissue massage and Mc Mennell joint manipulation in the rehabilitative treatment of the hands in systemic sclerosis. *Clinical Rheumatology*. 2009 2009; 28(10):1167-1173.
117. Maddali Bongli S, Del Rosso A, Galluccio F, Tai G, Sigismondi F, Passalacqua M, et al. Efficacy of a tailored rehabilitation program for systemic sclerosis. *Clin Exp Rheumatol*. 2009 May-Jun; 27(3 Suppl 54):44-50.
118. Oliveira NC, dos Santos Sabbag LM, de Sá Pinto AL, Borges CL, Lima FR. Aerobic exercise is safe and effective in systemic sclerosis. *Int J Sports Med*. 2009 Oct; 30(10):728-732.
119. Maddali-Bongli S, Landi G, Galluccio F, Del Rosso A, Miniati I, Conforti ML, et al. The rehabilitation of facial involvement in systemic sclerosis: efficacy of the combination of connective tissue massage, Kabat's technique and kinesitherapy: a randomized controlled trial. *Rheumatology International*. 2011 2011; 31(7):895-901.
120. Pinto AL, Oliveira NC, Gualano B, Christmann RB, Painelli VS, Artioli GG, et al. Efficacy and safety of concurrent training in systemic sclerosis. *Journal of Strength & Conditioning Research*. 2011 2011; 25(5):1423-1428.

121. Yuen HK, Weng Y, Bandyopadhyay D, Reed SG, Leite RS, Silver RM. Effect of a multi-faceted intervention on gingival health among adults with systemic sclerosis. *Clinical & Experimental Rheumatology*. 2011 2011; 29(2):S26-32.
122. Yuen HK, Marlow NM, Reed SG, Mahoney S, Summerlin LM, Leite R, et al. Effect of orofacial exercises on oral aperture in adults with systemic sclerosis. *Disability & Rehabilitation*. 2012 2012; 34(1):84-89.
123. Piga M, Tradori I, Pani D, Barabino G, Dessi A, Raffo L, et al. Telemedicine applied to kinesiotherapy for hand dysfunction in patients with systemic sclerosis and rheumatoid arthritis: recovery of movement and telemonitoring technology. *Journal of Rheumatology*. 2014 2014; 41(7):1324-1333.
124. Lima TR, Guimaraes FS, Carvalho MN, Sousa TL, Menezes SL, Lopes AJ. Lower limb muscle strength is associated with functional performance and quality of life in patients with systemic sclerosis. *Brazilian Journal of Physical Therapy*. 2015 2015; 19(2):129-136.
125. Stefanantoni K, Sciarra I, Iannace N, Vasile M, Caucci M, Sili Scavalli A, et al. Occupational therapy integrated with a self-administered stretching program on systemic sclerosis patients with hand involvement. *Clin Exp Rheumatol*. 2016 Sep-Oct; 34 Suppl 100(5):157-161.
126. Horváth J, Bálint Z, Szép E, Deiszingler A, Minier T, Farkas N, et al. Efficacy of intensive hand physical therapy in patients with systemic sclerosis. *Clin Exp Rheumatol*. 2017 Sep-Oct; 35 Suppl 106(4):159-166.
127. Rannou F, Boutron I, Mouthon L, Sanchez K, Tiffreau V, Hachulla E, et al. Personalized Physical Therapy Versus Usual Care for Patients With Systemic Sclerosis: A Randomized Controlled Trial. *Arthritis care & research*. 2017 2017; 69(7):1050-1059.
128. Azar M, Rice DB, Kwakkenbos L, Carrier ME, Shrier I, Bartlett SJ, et al. Exercise habits and factors associated with exercise in systemic sclerosis: a Scleroderma Patient-centered Intervention Network (SPIN) cohort study. *Disability & Rehabilitation*. 2018 2018; 40(17):1997-2003.
129. Brignoli E, Frassanito P, Vercesi E, Ferretti C, Felicetti G, Maestri R, et al. Rehabilitation in systemic sclerosis: proposed personalised rehabilitation programme. *G Ital Med Lav Ergon*. 2018 Dec; 40(4):248-256.
130. Mitropoulos A, Gumber A, Crank H, Akil M, Klonizakis M. The effects of upper and lower limb exercise on the microvascular reactivity in limited cutaneous systemic sclerosis patients. *Arthritis Res Ther*. 2018 Jun 5; 20(1):112.
131. Murphy SL, Barber MW, Homer K, Dodge C, Cutter GR, Khanna D. Occupational Therapy Treatment to Improve Upper Extremity Function in Individuals with Early Systemic Sclerosis: A Pilot Study. *Arthritis care & research*. 2018 2018; 70(11):1653-1660.
132. Gregory WJ, Wilkinson J, Herrick AL. A randomised controlled trial of wax baths as an additive therapy to hand exercises in patients with systemic sclerosis. *Physiotherapy*. 2019 2019; 105(3):370-377.
133. Kristensen LQ, Oestergaard LG, Bovbjerg K, Rolving N, Søndergaard K. Use of paraffin instead of lukewarm water prior to hand exercises had no additional effect on hand mobility in patients with systemic sclerosis: A randomized clinical trial. *Hand Therapy*. 2019 2019; 24(1):13-21.
134. Landim SF, Bertolo MB, Marcato de Abreu MF, Del Rio AP, Mazon CC, Marques-Neto JF, et al. The evaluation of a home-based program for hands in patients with systemic sclerosis. *Journal of Hand Therapy*. 2019 2019; 32(3):313-321.
135. Mitropoulos A, Gumber A, Akil M, Klonizakis M. Exploring the microcirculatory effects of an exercise programme including aerobic and resistance training in people with limited cutaneous systemic sclerosis. *Microvasc Res*. 2019 Sep; 125:103887.
136. Cetin SY, Calik BB, Ayan A. Investigation of the effectiveness of Tai Chi exercise program in patients with scleroderma: A randomized controlled study. *Complementary Therapies in Clinical Practice*. 2020 2020; 40:101181.
137. Filippetti M, Cazzoletti L, Zamboni F, Ferrari P, Caimmi C, Smania N, et al. Effect of a tailored home-based exercise program in patients with systemic sclerosis: A randomized controlled trial. *Scandinavian Journal of Medicine & Science in Sports*. 2020 2020; 30(9):1675-1684.
138. S FL, M BB, Del Rio AP, Sachetto Z, Zonzini Gaino J, J LP, et al. Sustained efficacy of a concise self-management programme for hands in systemic sclerosis: a longitudinal case-control observational study. *Rheumatology*. 2020 2020; 59(11):3330-3339.
139. Cüzdan N, Türk İ, Çiftçi V, Arslan D, Doğan MC, Ünal İ. The effect of a home-based orofacial exercise program on oral aperture of patients with systemic sclerosis: A single-blind prospective randomized controlled trial. *Archives of Rheumatology*. 2021 2021; 36(2):176-184.
140. Defi IR, Gultom C, Chorman MJ, Jennie J. High-intensity interval training can improve hand grip strength, inspiratory muscle, and quality of life in systemic sclerosis subjects. *Reumatologia*. 2021 2021; 59(2):98-103.
141. Gokcen N, Badak SO, Sarpel T, Serdemir Y, Erken E. The Efficacy of a Home-Based, Self-Administered Hand Exercise Program for Patients With Systemic Sclerosis: A Randomized Controlled, Evaluator-Blind, Clinical Trial. *JCR: Journal of Clinical Rheumatology*. 2021 2021; 6:06.
142. Maddali Bongli S, Passalacqua M, Landi G, Mikhaylova S, Tofani L, Del Rosso A, et al. Rehabilitation of the face and temporomandibular joint in systemic sclerosis. *Therapeutic Advances in Musculoskeletal Disease*. 2021 2021; 13.
143. Murphy SL, Barber M, Huang S, Sabbagh M, Cutter G, Khanna D. Intensive and App-Delivered Occupational Therapy to Improve Upper Extremity Function in Early Diffuse Cutaneous Systemic Sclerosis: A Pilot Two-Arm Trial. *Rheumatology*. 2021 2021; 11:11.
144. Samuelson UK, Ahlmen EM. Development and evaluation of a patient education program for persons with systemic sclerosis (scleroderma). *Arthritis Care & Research*. 2000 2000; 13(3):141-148.
145. Kwakkenbos L, Bluyssen SJ, Vonk MC, van Helmond AF, van den Ende CH, van den Hoogen FH, et al. Addressing patient health care demands in systemic sclerosis: pre-post assessment of a psycho-educational group programme. *Clin Exp Rheumatol*. 2011 Mar-Apr; 29(2 Suppl 65):S60-65.
146. Poole JL, Skipper B, Mendelson C. Evaluation of a mail-delivered, print-format, self-management program for persons with systemic sclerosis. *Clinical Rheumatology*. 2013 2013; 32(9):1393-1398.
147. Poole JL, Mendelson C, Skipper B, Khanna D. Taking charge of systemic sclerosis: a pilot study to assess the effectiveness of an internet self-management program. *Arthritis care & research*. 2014 2014; 66(5):778-782.
148. Zanatta E, Rodeghiero F, Pigatto E, Galozzi P, Polito P, Favaro M, et al. Long-term improvement in activities of daily living in women with systemic sclerosis attending occupational therapy. *British Journal of Occupational Therapy*. 2017 2017; 80(7):417-422.
149. Khanna D, Serrano J, Berrocal VJ, Silver RM, Cuencas P, Newbill SL, et al. Randomized Controlled Trial to Evaluate an Internet-Based Self-Management Program in Systemic Sclerosis. *Arthritis care & research*. 2019 2019; 71(3):435-447.
150. Thombs BD, Dias L, Pepin M, Aguila K, Carrier ME, Tao L, et al. Scleroderma Patient-centered Intervention Network-Scleroderma Support group Leader Education (SPIN-SSLED) program: non-randomised feasibility trial. *BMJ Open*. 2019 2019; 9(11):e029935.
151. Uras C, Mastroeni S, Tabolli S, Masini C, Pallotta S, Teofoli P, et al. A comparison between two educational methods in the rehabilitation of the microstomia in systemic sclerosis: a randomized controlled trial. *Clinical Rehabilitation*. 2019 2019; 33(11):1747-1756.
152. Thombs BD, Kwakkenbos L, Levis B, Bourgeault A, Henry RS, Levis AW, et al. Effects of a multi-faceted education and support programme on anxiety symptoms among people with systemic sclerosis and anxiety during COVID-19 (SPIN-CHAT): a two-arm parallel, partially nested, randomised, controlled trial. *Lancet Rheumatol*. 2021 Jun; 3(6):e427-e437.
153. Zhou J, Yang D, Zhou SH, Wang JP, Liu YS, Wang SL. Clinical Efficacy and Safety of Bathing with Chinese Medicine Taohong Siwu Decoction ( ) for Treatment of Diffuse Cutaneous Systemic Sclerosis: A Randomized Placebo-Controlled Trial. *Chinese Journal of Integrative Medicine*. 2018 2018; 24(3):185-192.
154. Lange U, Bogensperger S, Tarner IH, Müller-Ladner U. The effects of a single carbon dioxide and hot water hand bath on acral perfusion in systemic sclerosis: A randomized, clinical study. *Journal of Scleroderma and Related Disorders*. 2019 2019; 4(2):160-162.

155. Nowicka D. Positive effect of ozonotherapy on serum concentration of soluble interleukin-2 receptor and neopterin in patients with systemic sclerosis. *Postepy Dermatol Alergol*. 2019 Apr; 36(2):158-163.
156. Sallam H, McNearney TA, Doshi D, Chen JD. Transcutaneous electrical nerve stimulation (TENS) improves upper GI symptoms and balances the sympathovagal activity in scleroderma patients. *Dig Dis Sci*. 2007 May; 52(5):1329-1337.
157. Sporbeck B, Mathiske-Schmidt K, Jahr S, Huscher D, Becker M, Riemekasten G, et al. Effect of biofeedback and deep oscillation on Raynaud's phenomenon secondary to systemic sclerosis: results of a controlled prospective randomized clinical trial. *Rheumatology International*. 2012 2012; 32(5):1469-1473.
158. McNearney TA, Sallam HS, Hunnicutt SE, Doshi D, Chen JD. Prolonged treatment with transcutaneous electrical nerve stimulation (TENS) modulates neuro-gastric motility and plasma levels of vasoactive intestinal peptide (VIP), motilin and interleukin-6 (IL-6) in systemic sclerosis. *Clin Exp Rheumatol*. 2013 Mar-Apr; 31(2 Suppl 76):140-150.
159. Collins J, Mazor Y, Jones M, Kellow J, Malcolm A. Efficacy of anorectal biofeedback in scleroderma patients with fecal incontinence: a case-control study. *Scandinavian Journal of Gastroenterology*. 2016 2016; 51(12):1433-1438.
160. Dewi S, Isbaggio H, Purwaningsih EH, Kertia N, Setiabudy R, Setiati S. A Double-blind, Randomized Controlled Trial of Ciplukan (*Physalis angulata* Linn) Extract on Skin Fibrosis, Inflammation, Immunology, and Fibrosis Biomarkers in Scleroderma Patients. *Acta Medica Indonesiana*. 2019 2019; 51(4):303-310.
161. Giuggioli D, Lumetti F, Spinella A, Cocchiara E, Sighinolfi G, Citriniti G, et al. Use of Neem oil and *Hypericum perforatum* for treatment of calcinosis-related skin ulcers in systemic sclerosis. *Journal of International Medical Research*. 2020 2020; 48(4):300060519882176.
162. Bongio SM, Del Rosso A, Passalacqua M, Miccio S, Cerinic MM. Manual lymph drainage improving upper extremity edema and hand function in patients with systemic sclerosis in edematous phase. *Arthritis care & research*. 2011 2011; 63(8):1134-1141.
163. Vannajak K, Boonprakob Y, Eungpinichpong W, Ungpansattawong S, Nanagara R. The short-term effect of gloving in combination with Traditional Thai Massage, heat, and stretching exercise to improve hand mobility in scleroderma patients. *Journal of Ayurveda and Integrative Medicine*. 2014 2014; 5(1):50-55.
164. O'Connor S, Durand MJ, Hudson M, Baron M, Gaudreault N. Effects of osteopathic manipulative treatment on hand function, disease symptoms and functional status in systemic sclerosis: a series of single-case studies in working women. *International Journal of Osteopathic Medicine*. 2016 2016; 22:21-32.
165. Frech TM, Khanna D, Maranian P, Frech EJ, Sawitzke AD, Murtaugh MA. Probiotics for the treatment of systemic sclerosis-associated gastrointestinal bloating/distention. *Clin Exp Rheumatol*. 2011 Mar-Apr; 29(2 Suppl 65):S22-25.
166. Ortiz-Santamaria V, Puig C, Soldevilla C, Barata A, Cuquet J, Recasens A. Nutritional support in patients with systemic sclerosis. *Reumatologia Clinica*. 2014 2014; 10(5):283-287.
167. Doerfler B, Allen TS, Southwood C, Brenner D, Hirano I, Sheehan P. Medical Nutrition Therapy for Patients With Advanced Systemic Sclerosis (MNT PASS): A Pilot Intervention Study. *Jpen: Journal of Parenteral & Enteral Nutrition*. 2017 2017; 41(4):678-684.
168. Low AHL, Teng GG, Pettersson S, de Sessions PF, Ho EXP, Fan Q, et al. A double-blind randomized placebo-controlled trial of probiotics in systemic sclerosis associated gastrointestinal disease. *Seminars in Arthritis & Rheumatism*. 2019 2019; 49(3):411-419.
169. Marighela TF, Arismendi MI, Marville V, Brunialti MKC, Salomao R, Kayser C. Effect of probiotics on gastrointestinal symptoms and immune parameters in systemic sclerosis: a randomized placebo-controlled trial. *Rheumatology*. 2019 2019; 58(11):1985-1990.
170. Fretheim H, Chung BK, Didriksen H, Baekkevold ES, Midtvedt O, Brunborg C, et al. Fecal microbiota transplantation in systemic sclerosis: A double-blind, placebo-controlled randomized pilot trial. *PLoS ONE [Electronic Resource]*. 2020 2020; 15(5):e0232739.
171. Foerster J, Fleischanderl S, Wittstock S, Storch A, Meffert H, Riemekasten G, et al. Infrared-mediated hyperthermia is effective in the treatment of scleroderma-associated Raynaud's phenomenon. *Journal of Investigative Dermatology*. 2005 2005; 125(6):1313-1316.
172. Murray AK, Moore TL, Richards H, Ennis H, Griffiths CE, Herrick AL. Pilot study of intense pulsed light for the treatment of systemic sclerosis-related telangiectases. *British Journal of Dermatology*. 2012 2012; 167(3):563-569.
173. Dinsdale G, Murray A, Moore T, Ferguson J, Wilkinson J, Richards H, et al. A comparison of intense pulsed light and laser treatment of telangiectases in patients with systemic sclerosis: a within-subject randomized trial. *Rheumatology*. 2014 2014; 53(8):1422-1430.
174. Burillo-Martinez S, Prieto-Barrios M, Velasco-Tamariz V, Tous-Romero F, Lopez-Gomez S, Maronas-Jimenez L. Case series of pulsed dye laser treatment of telangiectasia in 23 patients with systemic sclerosis. *International Journal of Dermatology*. 2017 2017; 56(8):e165-e167.
175. Rosholm Comstedt L, Svensson A, Hesselstrand R, Lehti L, Troilius Rubin A. Effects of intense pulsed light in microstomia in patients with systemic sclerosis: A pilot study. *Journal of Cosmetic & Laser Therapy*. 2017 2017; 19(3):143-148.
176. Hughes M, Moore T, Manning J, Wilkinson J, Watson S, Samraj P, et al. A feasibility study of a novel low-level light therapy for digital ulcers in systemic sclerosis. *Journal of Dermatological Treatment*. 2019 2019; 30(3):251-257.
177. Tinazzi E, Amelio E, Marangoni E, Guerra C, Puccetti A, Codella OM, et al. Effects of shock wave therapy in the skin of patients with progressive systemic sclerosis: a pilot study. *Rheumatology International*. 2011 2011; 31(5):651-656.
178. Belloli L, Cugno M, D'Agostino MC, Ughi N, Tedeschi A, Respizzi S, et al. Shock wave therapy for systemic sclerosis. *Rheumatol Int*. 2013 Apr; 33(4):1099-1100.
179. Saito S, Ishii T, Ito K, Shimokawa H. Extracorporeal shock wave therapy for digital ulcers associated with systemic sclerosis. *Journal of Scleroderma and Related Disorders*. 2016 2016; 1(2):181-185.
180. Saito S, Ishii T, Kamogawa Y, Watanabe R, Shirai T, Fujita Y, et al. Extracorporeal Shock Wave Therapy for Digital Ulcers of Systemic Sclerosis: A Phase 2 Pilot Study. *Tohoku Journal of Experimental Medicine*. 2016 2016; 238(1):39-47.
181. Poole J, Conte C, Brewer C, Good CC, Perella D, Rossie KM, et al. Oral hygiene in scleroderma: The effectiveness of a multi-disciplinary intervention program. *Disability & Rehabilitation*. 2010 2010; 32(5):379-384.
182. Schouffoer AA, Ninaber MK, Beart-van de Voorde LJ, van der Giesen FJ, de Jong Z, Stolk J, et al. Randomized comparison of a multidisciplinary team care program with usual care in patients with systemic sclerosis. *Arthritis care & research*. 2011 2011; 63(6):909-917.
183. Mirasoglu B, Bagli BS, Aktas S. Hyperbaric oxygen therapy for chronic ulcers in systemic sclerosis - case series. *International Journal of Dermatology*. 2017 2017; 56(6):636-640.
184. Hassanien M, Rashad S, Mohamed N, Elawamy A, Ghaly MS. Non-invasive Oxygen-Ozone therapy in treating digital ulcers of patients with systemic sclerosis. *Acta Reumatologica Portuguesa*. 2018 2018; 43(3):210-216.
185. Yuen HK, Westwater C, Degarmo J, Bandyopadhyay D. Immediate Effect of Xylitol Chewing Gum and Mouth Rinse on Salivary Levels of Mutans Streptococci in Adults with Systemic Sclerosis: A Pilot Study. *Journal of Experimental & Integrative Medicine*. 2012 2012; 2(1):89-92.
186. Onesti MG, Fioramonti P, Carella S, Fino P, Marchese C, Scuderi N. Improvement of Mouth Functional Disability in Systemic Sclerosis Patients over One Year in a Trial of Fat Transplantation versus Adipose-Derived Stromal Cells. *Stem Cells Int*. 2016; 2016:2416192.
187. Parisi S, Celletti C, Scarati M, Priora M, Laganà A, Peroni CL, et al. Neuromuscular taping enhances hand function in patients with systemic sclerosis: a pilot study. *Clin Ter*. 2017 Nov-Dec; 168(6):e371-e375.
188. Fiori G, Marzi T, Bartoli F, Bruni C, Ciceroni C, Palomba M, et al. The challenge of pet therapy in systemic sclerosis: evidence for an impact on pain, anxiety, neuroticism and social interaction. *Clin Exp Rheumatol*. 2018 Jul-Aug; 36 Suppl 113(4):135-141.

189. Frech TM, McNeill C, Lebiedz-Odrobina D, Lewis G. Amniotic membrane dressings: an effective therapy for SSc-related wounds. *Rheumatology (Oxford)*; 2019:734-736.
190. (Editor) AE, (Editor) MZ. JBI Manual for Evidence Synthesis. JBI Manual for Evidence Synthesis 2020 [cited 2022 February 25]; Available from: <https://synthesismanual.jbi.global>

## Supplemental Table S3

### RESEARCH QUESTION 4: WHICH INSTRUMENTS HAVE BEEN USED TO ASSESS THE OUTCOME OF NON-PHARMACOLOGICAL MANAGEMENT?

### RESEARCH QUESTION 5: WHEN SHOULD THE OUTCOME OF NON-PHARMACOLOGICAL MANAGEMENT BE ASSESSED?

| Intervention/management strategy                                                                                                                                                                                                                            | Comparator         | N                               | Outcome measures                                                                                                                                                                                                                                    | Assessment timepoints        | SD&OA* | Reference                |
|-------------------------------------------------------------------------------------------------------------------------------------------------------------------------------------------------------------------------------------------------------------|--------------------|---------------------------------|-----------------------------------------------------------------------------------------------------------------------------------------------------------------------------------------------------------------------------------------------------|------------------------------|--------|--------------------------|
| <b>SLE</b>                                                                                                                                                                                                                                                  |                    |                                 |                                                                                                                                                                                                                                                     |                              |        |                          |
| <b>Physical exercise and physical activity</b>                                                                                                                                                                                                              |                    |                                 |                                                                                                                                                                                                                                                     |                              |        |                          |
| <p>P: Phase I: supervised aerobic exercise at 70-80% of maximum heart rate.</p> <p>Phase II: continue exercise in the supervised setting for 1 month/ unsupervised home exercise programme for 6 months.</p> <p>C: Range of motion/muscle strengthening</p> | Other SLE patients | Intervention: 5<br>Control: 5   | <p>Exercise treadmill: maximum exercise capacity (METS)</p> <p>Bone mineral density</p> <p>Biomarkers: PTH, osteocalcin</p> <p>SLAM</p> <p>FSS</p> <p>SF-36 PF</p> <p>Maximum muscle strength (isokinetic exercise machine, CYBEX)</p> <p>SF-36</p> | Baseline, 2 months, 6 months | 11; W  | Ramsey-Goldman, 2000 [1] |
| <p>P: Exercise group= exercise (walking, cycling, and swimming)</p> <p>Relaxation group= listen to a relaxation audiotape in a darkened, warm, and quiet room</p> <p>C: Relaxation group: listen to relaxation audiotape</p>                                | Other SLE patients | Intervention: 62<br>Control: 32 | <p>HAD</p> <p>SLAM</p> <p>Clinical global impression change score</p> <p>FSS</p> <p>Chalder Fatigue Scale (CFS)</p> <p>VAS fatigue</p> <p>SF-36</p> <p>PSQI</p> <p>Test duration, max O2 uptake, max ventilation, max HR, recovery HR.</p>          | Baseline, 12 weeks           | 11; I  | Tench, 2003 [2]          |
| <p>P: Supervised aerobic exercise: incremental load on a treadmill</p> <p>C: Usual care</p>                                                                                                                                                                 | Other SLE patients | Intervention: 41<br>Control: 19 | <p>Physiologic variables</p> <p>HAQ</p> <p>SF-36</p> <p>BDI</p> <p>VAS for pain</p> <p>VAS for fatigue</p>                                                                                                                                          | Baseline, 12 weeks           | 10; I  | Carvalho, 2005 [3]       |

| Intervention/management strategy                                                                                                                                | Comparator                      | N                               | Outcome measures                                                                                                                                                                                                                                                                                                    | Assessment timepoints                                                                                                                                                        | SD&OA* | Reference                |
|-----------------------------------------------------------------------------------------------------------------------------------------------------------------|---------------------------------|---------------------------------|---------------------------------------------------------------------------------------------------------------------------------------------------------------------------------------------------------------------------------------------------------------------------------------------------------------------|------------------------------------------------------------------------------------------------------------------------------------------------------------------------------|--------|--------------------------|
| P: Supervised aerobic exercise: walking on a treadmill for a 3-month programme<br>C: N/A: intraindividual assessment                                            | N/A; intraindividual assessment | Intervention: 6<br>Control: -   | SLEDAI<br>Modified HAQ<br>SF-36 VT and BP<br>Aerobic capacity (VO2 max)                                                                                                                                                                                                                                             | Every week for 3 weeks before starting the exercise programme, 4, 8, and 12 weeks during the exercise programme - 3 months after the exercise program had ended (follow up). | 10; R  | Clarke-Jenssen, 2005 [4] |
| P: Cardiorespiratory exercise test carried out on a treadmill<br>C: No                                                                                          | Healthy controls                | Intervention: 20<br>Control: 20 | Tidal volume (VT)<br>breathing frequency (BF)<br>total respiratory time (TOT)<br>inspiratory time (TI)<br>expiratory time (TE)<br>inspiratory time to total time (TI/TOT)<br>mean inspiratory flow (VT/TI)<br>ventilatory equivalent for carbon dioxide (VE/VCO2)<br>and end-tidal carbon dioxide pressure (PETCO2) | Immediate results                                                                                                                                                            | 1; R   | do Prado, 2011 [5]       |
| P: Program of increasing exercise from 100 to 300 min/week (combined with reduced-calorie diet)<br>C: N/A: intraindividual assessment                           | N/A; intraindividual assessment | Intervention: 15<br>Control: -  | BMI<br>Waist circumference<br>Self-reported physical activity                                                                                                                                                                                                                                                       | Baseline, 16 weeks                                                                                                                                                           | 10; W  | Otto, 2011 [6]           |
| P: Home exercise program using Wii Fit interactive video game for 10 weeks<br>C: N/A: intraindividual assessment                                                | N/A; intraindividual assessment | Intervention: 15<br>Control: -  | Body weight<br>Waist circumference<br>HADS<br>FSS<br>Short-form of the McGill Pain Questionnaire (SF-MPQ) at week 10<br>Pittsburgh Sleep Quality Index (PSQI)                                                                                                                                                       | Baseline, 10 weeks                                                                                                                                                           | 10; R  | Yuen, 2011 [7]           |
| P: Supervised training sessions: 35–40 minutes of resistance, 30 minutes of treadmill aerobic training, and 5 minutes of stretching exercises.<br>C: Usual care | Other SLE patients              | Intervention: 14<br>Control: 10 | Chronotropic reserve (CR);<br>Heart rate recovery (absolute change) at the first minute after exercise (HRR1) at the second minute after exercise (HRR2).                                                                                                                                                           | Baseline, 12 weeks                                                                                                                                                           | 11; W  | Miozzi, 2012 [8]         |
| P: Ergospirometric test<br>C: No                                                                                                                                | Healthy controls                | Intervention: 27<br>Control: 30 | Cardiopulmonary exercise test<br>IL-6, IL-10 and TNF-a                                                                                                                                                                                                                                                              | Immediate results                                                                                                                                                            | 10; I  | da Silva, 2013 [9]       |
| P: Supervised walking at a heart rate corresponding to the VT1 threshold.<br>C: Usual care                                                                      | Other SLE patients              | Intervention: 18<br>Control: 20 | SLEDAI<br>Flow-mediated dilation (FMD)<br>Cardiopulmonary exercise test                                                                                                                                                                                                                                             | Baseline, 16 weeks                                                                                                                                                           | 10; R  | dos Reis-Neto, 2013 [10] |

| Intervention/management strategy                                                                                                                   | Comparator                           | N                               | Outcome measures                                                                                                                                               | Assessment timepoints        | SD&OA* | Reference             |
|----------------------------------------------------------------------------------------------------------------------------------------------------|--------------------------------------|---------------------------------|----------------------------------------------------------------------------------------------------------------------------------------------------------------|------------------------------|--------|-----------------------|
| P: Walking, running, cycling, or use of an elliptical machine.<br>C: No                                                                            | Other SLE patients, healthy controls | Intervention: 14<br>Control: 12 | SLAQ<br>CRP, IL-12, ICAM-1 and TNF- $\alpha$<br>Flow-mediated dilation (FMD).                                                                                  | Immediate results            | 1; I   | Barnes, 2014 [11]     |
| P: Treadmill walking<br>C: No                                                                                                                      | Healthy controls                     | Intervention: 8<br>Control: 10  | Cardiopulmonary exercise test<br>Weight, BMI<br>SLEDAI<br>FSS<br>IFN-gamma, IL-10, IL-6, TNF- $\alpha$ , sTNFR1, and sTNFR2<br>CRP<br>C3 and C4<br>SF-36       | Baseline, 12 weeks           | 10; I  | Perandini, 2014 [12]  |
| P: Seven strength exercises for the major muscle groups followed by aerobic exercise on a treadmill.<br>C: Usual care                              | Other SLE patients, healthy controls | Intervention: 17<br>Control: 16 | Total cholesterol, HDLc, LDLc, VLDLc, triglycerides.<br>Composition of the HDL subfractions                                                                    | Baseline, 12 weeks           | 11; W  | Benatti, 2015 [13]    |
| P: Aerobic training on a bicycle ergometer, for 6 weeks.<br>C: N/A: intraindividual assessment                                                     | N/A; intraindividual assessment      | Intervention: 30<br>Control: 30 | Beck depression inventory (BDI)<br>Fatigue Severity Scale (FSS)<br>SF-36                                                                                       | Baseline, 6 weeks            | 11; W  | Bogdanovic, 2015 [14] |
| P: Two single bouts of acute aerobic exercise (moderate and intense) performed in a treadmill<br>C: No                                             | Other SLE patients, healthy controls | Intervention: 23<br>Control: 10 | INF- $\gamma$ , IL-10, IL-6, TNF- $\alpha$ and soluble TNF receptors (sTNFR1 and sTNFR2)                                                                       | Immediate results            | 10; I  | Perandini, 2015 [15]  |
| P: Walking and bicycle vs free weight and elastic bands exercises 3 times/week for 12 weeks<br>C: Usual care                                       | Other SLE patients                   | Intervention: 21<br>Control: 21 | BDI<br>SLEDAI<br>SF-36<br>12-minute walk test                                                                                                                  | Baseline, 12 weeks           | 11; I  | Abrahamo, 2016 [16]   |
| P: Endurance exercises (walking or bicycle) + strengthening exercises (with elastoband or weights for both upper and lower limbs)<br>C: Usual care | Other SLE patients                   | Intervention: 15<br>Control: 18 | FSS<br>Physical working capacity (measured at 75% of the predicted maximal heart rate<br>PWC75%/kg)<br>Modified Borg's scale to assess perception of exertion. | Baseline, 3 months, 9 months | 11; W  | Avaux, 2016 [17]      |



| Intervention/management strategy                                                                                                                                                                                           | Comparator                           | N                                      | Outcome measures                                                                                                                                                                                                                            | Assessment timepoints                                          | SD&OA* | Reference            |
|----------------------------------------------------------------------------------------------------------------------------------------------------------------------------------------------------------------------------|--------------------------------------|----------------------------------------|---------------------------------------------------------------------------------------------------------------------------------------------------------------------------------------------------------------------------------------------|----------------------------------------------------------------|--------|----------------------|
| <p>P: 0 to 3 months: high + low-moderate intensity aerobic exercise + education+ individual coaching.</p> <p>4 to 12 months: high + low-moderate intensity aerobic exercise + individual coaching</p> <p>C: Usual care</p> | Other SLE patients                   | Intervention: 18<br>Control: 17        | Maximal oxygen uptake (VO2 max)<br>SLEDAI<br>SF-36<br>SDI<br>Self-reported question for physical activity                                                                                                                                   | Baseline, 3 months, 6-month,12 months                          | 11; I  | Bostrom, 2016 [18]   |
| <p>P: Single bout of acute aerobic exercise performed 72 hours after a cardiopulmonary exercise test to determine VAT and RCP</p> <p>C: No</p>                                                                             | Other SLE patients, healthy controls | Intervention: 8<br>Control: 4          | Quantitative PCR array assay of a panel of immune-related genes (altered if fold changes of >2)                                                                                                                                             | At baseline, at end of exercise, after three hours of recovery | 10; I  | Perandini, 2016 [19] |
| <p>P: Various modalities: aerobic exercise programme, resistance training, multi-component interventions.</p> <p>C: N/A</p>                                                                                                | N/A                                  | 6 RCTs and 5 quasi-RCTs                | Aerobic capacity<br>BDI<br>HADS<br>SLEDAI<br>FSS                                                                                                                                                                                            | Dissimilar time points. Span: 6–52 weeks                       | 12; R  | O'Dwyer, 2017 [20]   |
| <p>P: Aerobic exercise (treadmill, walking/cycling/swimming)</p> <p>C: N/A</p>                                                                                                                                             | N/A                                  | 3 studies: 2 RCT, 1 quasi-experimental | FSS<br>SF-36 VT<br>VAS fatigue                                                                                                                                                                                                              | 8/12 weeks                                                     | 12; R  | Wu, 2017 [21]        |
| <p>P: Supervised treadmill aerobic training</p> <p>C: No</p>                                                                                                                                                               | Other SLE patients                   | Intervention: 9<br>Control: 10         | Cardiopulmonary exercise test<br>Body weight<br>Fat, lean mass<br>24-h dietary recalls<br>Fasting glucose and insulin levels<br>Matsuda index + insulinogenic index<br>phospho-AMPK Thr 172 assessed through muscle biopsy and western blot | Baseline, 12 weeks                                             | 11; W  | Benatti, 2018 [22]   |

| Intervention/management strategy                                                                                                                                                                    | Comparator                      | N                               | Outcome measures                                                                                                                                                                                                                                                                                                 | Assessment timepoints       | SD&OA* | Reference                    |
|-----------------------------------------------------------------------------------------------------------------------------------------------------------------------------------------------------|---------------------------------|---------------------------------|------------------------------------------------------------------------------------------------------------------------------------------------------------------------------------------------------------------------------------------------------------------------------------------------------------------|-----------------------------|--------|------------------------------|
| P: Hatha yoga classes (deep breathing, relaxation, meditation, poses for strength, flexibility, and balance) + encouragement to home practice for 8 weeks<br><br>C: N/A: intraindividual assessment | N/A; intraindividual assessment | Intervention: 7<br>Control: -   | Personal Journals<br>Interviews                                                                                                                                                                                                                                                                                  | Baseline, 8 weeks           | 9; W   | Middleton, 2018 [23]         |
| P: Aerobic exercise on a treadmill<br><br>C: Guidelines about healthy lifestyle                                                                                                                     | Other SLE patients              | Intervention: 26<br>Control: 32 | High-sensitivity hsCRP, TNF- $\alpha$ , IL-6<br>Oxidative stress markers (MPO)<br>Bruce test<br>Arterial stiffness - pulse wave velocity (PWV)                                                                                                                                                                   | Baseline, 12 weeks          | 10; I  | Soriano-Maldonado, 2018 [24] |
| P: Kinesiotherapy protocol for 4 months<br><br>C: Usual care                                                                                                                                        | Other SLE patients              | Intervention: 5<br>Control: 9   | BMI and skin folds,<br>Body circumferences<br>Percentage of body fat<br>SF-36<br>Cytokine levels: TNF- $\alpha$ , IL-2, IL-5, IL-6, IL-8, IL-10 (ELISA)<br>CD11b+ and CXCR2+ neutrophils and lymphocytes<br>Flexibility tests<br>10 maximal repetitions test (10 RM)<br>Tinetti gait and balance evaluation test | Baseline, 4 months          | 10; R  | Timoteo, 2018 [25]           |
| P: Aerobic exercise<br><br>C: N/A                                                                                                                                                                   | N/A                             | 2 RCTs                          | SF-36                                                                                                                                                                                                                                                                                                            | 3/12 months                 | 12; R  | da Hora, 2019 [26]           |
| P: Walk With Ease (WWE) programme<br><br>C: Did not complete intervention                                                                                                                           | Other SLE patients              | Intervention: 48<br>Control: 27 | FACIT-Fatigue<br>VAS fatigue<br>VAS pain<br>Satisfaction survey                                                                                                                                                                                                                                                  | Baseline, 6 weeks           | 10; I  | Sheikh, 2019 [27]            |
| P: Wearing of pedometer + face-to-face physical activity counselling + follow up phone calls<br><br>C: Usual care                                                                                   | Other SLE patients              | Intervention: 38<br>Control: 38 | FSS<br>SF-36<br>Pittsburgh Sleep Quality Index (PSQI)<br>Daily steps                                                                                                                                                                                                                                             | Baseline, 8 weeks, 12 weeks | 11; I  | Wu, 2019 [28]                |
| P: Moderate to vigorous intensity aerobic exercise<br><br>C: Physical activity guidelines and basic nutritional information                                                                         | Other SLE patients              | Intervention: 26<br>Control: 32 | Bruce submaximal treadmill protocol<br>Beck depression inventory<br>Multidimensional fatigue inventory<br>SF-36<br>Perceived stress scale<br>PSQI                                                                                                                                                                | Baseline, 12 weeks          | 10; I  | Gavilan-Carrera, 2020 [29]   |



| Intervention/management strategy                                                                                                                                                                      | Comparator         | N                                                    | Outcome measures                                                                                                                                                                                                                   | Assessment timepoints               | SD&OA* | Reference              |
|-------------------------------------------------------------------------------------------------------------------------------------------------------------------------------------------------------|--------------------|------------------------------------------------------|------------------------------------------------------------------------------------------------------------------------------------------------------------------------------------------------------------------------------------|-------------------------------------|--------|------------------------|
| P: Strengthening and stretching upper limb exercises<br><br>C: Four sessions of training in alternative methods of performing daily activities, use of aids, joint protection and energy conservation | Other SLE patients | Intervention: 31<br>Control: 27                      | Disability of arm, shoulder and hand (DASH)<br>HAQ<br>LupusQoL<br>Grip and pinch strength<br>Purdue test                                                                                                                           | 6, 12 and 24 weeks                  | 11; W  | Keramiotou, 2020 [30]  |
| P: Whole body vibration exercises (WBVE)<br><br>C: Whole body vibration exercise                                                                                                                      | Healthy controls   | Intervention: 18<br>Control: 9                       | sEMG of GM (gastrocnemius medialis), VL (Vastus lateralis), TA (tibialis anterior) muscles                                                                                                                                         | Baseline, 1 month                   | 11; I  | Dionello, 2021 [31]    |
| P: Home-based moderate-intensity aerobic exercise and resistance training.<br><br>C: Usual care                                                                                                       | Other SLE patients | Intervention: 12<br>Control: 11                      | Fitness Index (FI) in 2 km walking test at week 12, Go/no-go test, Stroop task                                                                                                                                                     | Baseline, 12 weeks                  | 10; I  | Kao, 2021 [32]         |
| P: Whole body vibration exercises (WBVE)<br><br>C: Isometry training programme                                                                                                                        | Other SLE patients | Intervention: 11<br>Control: 10                      | FACIT-F<br>Timed up and go (TUG)<br>HAQ<br>SF-36                                                                                                                                                                                   | Baseline, 6 weeks, 12. weeks        | 11; W  | Lopes-Souza, 2021 [33] |
| P: No intervention.<br><br>Exposure: sedentary behaviour, as per one item from the Rapid Assessment of Physical Activity (RAPA).<br><br>C: Self-reported physical activity                            | Other SLE patients | Intervention: 41<br>Control: 184                     | Adjusted Risk of Incident Depression (Incident depression= a change in PHQ-8 score from less than 10 at baseline to greater than or equal to 10 during follow-up)<br>SLEDAI<br>SDI<br>Rapid assessment of physical activity (RAPA) | Baseline, up to 36 months           | 5; R   | Patterson, 2021 [34]   |
| <b>Patient education and self-management</b>                                                                                                                                                          |                    |                                                      |                                                                                                                                                                                                                                    |                                     |        |                        |
| P: Attend a self-management course<br><br>C: Usual care                                                                                                                                               | Other SLE patients | Intervention: 21<br>Control: 20                      | Multidimensional Assessment of Fatigue<br>BDI<br>VAS scale for pain<br>7 items devised by Arthritis Foundation<br>10 items devised by Arthritis Foundation                                                                         | Baseline, 6 weeks                   | 10; I  | Sohng, 2003 [35]       |
| P: Educational programme<br><br>C: Educational programme                                                                                                                                              | Ssc patients       | Intervention: 5 with Ssc, 5 with SLE<br>Control: N/A | Results of interview                                                                                                                                                                                                               | Immediate results (interview study) | 9; R   | Brown, 2004 [36]       |

| Intervention/management strategy                                                                                                                             | Comparator                      | N                               | Outcome measures                                                                                                                                                                                                                                          | Assessment timepoints                                                | SD&OA* | Reference            |
|--------------------------------------------------------------------------------------------------------------------------------------------------------------|---------------------------------|---------------------------------|-----------------------------------------------------------------------------------------------------------------------------------------------------------------------------------------------------------------------------------------------------------|----------------------------------------------------------------------|--------|----------------------|
| P: Attend a psychoeducational group combining functional strategy training and psychosocial support (MINDFULL program)<br>C: N/A: intraindividual assessment | N/A; intraindividual assessment | Intervention: 17<br>Control: -  | BDI<br>Metamemory in Adulthood Questionnaire (MIA)<br>Memory Functioning Questionnaire (MFQ)<br>SDI                                                                                                                                                       | Baseline, 8 weeks                                                    | 10; I  | Harrison, 2005 [37]  |
| P: Take part in a patient education program<br>C: N/A: intraindividual assessment                                                                            | N/A; intraindividual assessment | Intervention: 13<br>Control: -  | SF-36<br>VAS for Pain<br>VAS for fatigue<br>VAS for physical well-being<br>Patient satisfaction questionnaire                                                                                                                                             | Baseline, 3 months                                                   | 9; R   | Miljeteig, 2009 [38] |
| P: Attend the Chronic Disease Self-Management Program (CDSMP)<br>C: N/A: intraindividual assessment                                                          | N/A; intraindividual assessment | Intervention: 45<br>Control: -  | SF-36<br>Self-efficacy for Managing Chronic Disease Scale<br>Cognitive Symptom Management Scale<br>Exercise Behavior Scale<br>three-item Communication with Physicians Scale<br>Self-reported Medication-taking Scale<br>Grady Health Electronic Records. | Baseline, 4 months                                                   | 10; I  | Drenkard, 2012 [39]  |
| P: Education regarding SLE and its management including lifestyle modifications<br>C: Usual care                                                             | Other SLE patients              | Intervention: 21<br>Control: 20 | Modified Morisky Scale (MMS)<br>Knowledge assessment questionnaire                                                                                                                                                                                        | Baseline, 1 month, 2 months                                          | 11; W  | Ganachari, 2012 [40] |
| P: Standardised daily cellular text message reminders (CTMR) for HCQ intake as prescribed + printed information sheet<br>C: Usual care                       | Other SLE patients              | Intervention: 19<br>Control: 22 | Medication Adherence Self-Report Inventory (MASRI)<br>whole-blood levels of HCQ<br>pharmacy refill adherence<br>Percentage of clinic visits occurred "on time"<br>SLEDAI                                                                                  | Baseline, at follow up visits (about every 2–4 months) for 14 months | 11; W  | Ting, 2012 [41]      |
| P: Take part in BLESS (Balancing Lupus Experience with Stress Strategies) study<br>C: Usual care                                                             | Other SLE patients              | Intervention: 15<br>Control: 15 | Medical Outcomes Study (MOS) health distress scale<br>Arthritis Self-Efficacy Scale<br>BDI<br>LUP-QOL<br>State-Trait Anxiety Inventory (STAI)                                                                                                             | Baseline, 4 months                                                   | 11; W  | Williams, 2014 [42]  |

| Intervention/management strategy                                                                                                                                                                                           | Comparator                      | N                               | Outcome measures                                                                                                                                                                                                                                                     | Assessment timepoints                 | SD&OA* | Reference            |
|----------------------------------------------------------------------------------------------------------------------------------------------------------------------------------------------------------------------------|---------------------------------|---------------------------------|----------------------------------------------------------------------------------------------------------------------------------------------------------------------------------------------------------------------------------------------------------------------|---------------------------------------|--------|----------------------|
| <p>P: 0 to 3 months: high + low-moderate intensity aerobic exercise + education+ individual coaching.</p> <p>4 to 12 months: high + low-moderate intensity aerobic exercise + individual coaching</p> <p>C: Usual care</p> | Other SLE patients              | Intervention: 18<br>Control: 17 | Maximal oxygen uptake (VO2 max)<br>SLEDAI<br>SF-36<br>SDI<br>Self-reported question for physical activity                                                                                                                                                            | Baseline, 3 months, 6-month,12 months | 11; I  | Bostrom, 2016 [18]   |
| <p>P: 3 phases targeted nursing</p> <p>C: Regular specific nursing</p>                                                                                                                                                     | Other SLE patients              | Intervention: 58<br>Control: 58 | Likert scaling method<br>SLEDAI<br>SDI<br>SF-36                                                                                                                                                                                                                      | Baseline, 20 months                   | 11; W  | Zhang, 2016 [43]     |
| <p>P: Take part in FAME (Fatigue and Activity Management Education) = 1 h group education / 1 h individual goal</p> <p>C: N/A: intraindividual assessment</p>                                                              | N/A; intraindividual assessment | Intervention: 21<br>Control: -  | FSS<br>FAI<br>SEPECSA<br>HADS-A<br>HADS-D<br>LupusQoL                                                                                                                                                                                                                | Baseline, 6 weeks, 8 weeks            | 10; I  | O'Riordan, 2017 [44] |
| <p>P: 3-year CVD prevention counselling program</p> <p>C: N/A: intraindividual assessment</p>                                                                                                                              | N/A; intraindividual assessment | Intervention: 121<br>Control: - | Blood pressure<br>Blood glucose<br>Cholesterol profile<br>BMI                                                                                                                                                                                                        | Baseline, 3 years                     | 10; I  | Yelnik, 2017 [45]    |
| <p>P: Session of mentoring</p> <p>C: N/A: intraindividual assessment</p>                                                                                                                                                   | N/A; intraindividual assessment | Intervention: 36<br>Control: -  | Self-care agency scale<br>Self-rated abilities on the health practices scale<br>Lupus quality inventory                                                                                                                                                              | Weekly                                | 10; I  | Kusnanto, 2018 [46]  |
| <p>P: Follow a web-based educational program + answer module questions on an online social media forum with other participants</p> <p>C: Usual care</p>                                                                    | Other SLE patients              | Intervention:13<br>Control: 14  | MPR (medication possession ratio)<br>MASRI (medication adherence self-report inventory)<br>PSQ<br>CASE (children arthritis self-efficacy scale)<br>SMILEY (erythematosus in youngsters) index<br>3 Likert scale questions<br>22-item scale<br>Validated Likert scale | Baseline, 3 months                    | 11; W  | Scalzi, 2018 [47]    |

| Intervention/management strategy                                                                                                              | Comparator                      | N                               | Outcome measures                                                                                      | Assessment timepoints       | SD&OA* | Reference           |
|-----------------------------------------------------------------------------------------------------------------------------------------------|---------------------------------|---------------------------------|-------------------------------------------------------------------------------------------------------|-----------------------------|--------|---------------------|
| P: Receive education and support by a peer-to-peer mentoring<br>C: N/A: intraindividual assessment                                            | N/A; intraindividual assessment | Intervention: 23<br>Control: -  | SF-36<br>PHQ-9<br>GAD-7<br>PSS<br>Patient activation measure<br>Systemic Lupus Activity Questionnaire | Baseline, 6 weeks, 12 weeks | 10; I  | Williams, 2018 [48] |
| P: To be enrolled in the Peer Approaches to Lupus Self-management (PALS) program<br>C: N/A: intraindividual assessment                        | N/A; intraindividual assessment | Intervention: 20<br>Control: -  | PHQ-8<br>GAD-8 score<br>SLAQ<br>Th1/Th2 cytokine balance<br>LUP-QOL<br>Patient Activation Measure     | Baseline, 6 weeks, 12 weeks | 10; I  | Williams, 2019 [49] |
| P: Use of SimpleMed+ pillbox to organise and administer medication + receiving digital reminders during 2 <sup>o</sup> month<br>C: Usual care | Other SLE patients              | Intervention: 8<br>Control: 11  | Report from SimpleMed+ pillbox: pill count<br>MASRI                                                   | Baseline, 3 months          | 11; W  | Harry, 2020 [50]    |
| P: Web-based education programme (3 months) followed by telephone counselling by physicians (3 months)<br>C: Usual care                       | Other SLE patients              | Intervention: 40<br>Control: 40 | FSS<br>Self-Efficacy for Managing Chronic Disease 6-Item Scale                                        | Baseline, Month 6           | 11; W  | Kankaya, 2020 [51]  |
| P: App for self-tracking lifestyle activities and symptoms, and weekly telehealth coaching sessions<br>C: Usual care                          | Other SLE patients              | Intervention: 25<br>Control: 22 | Number of days with at least 1 login<br>FACIT-Fatigue<br>LupusQoL<br>BPI-SF                           | Baseline, 16 weeks          | 11; W  | Khan, 2020 [52]     |
| P: PainTRAINER: 8 weeks, automated, internet-based version of pain coping skills training programme<br>C: Usual care                          | Other SLE patients              | Intervention: 30<br>Control: 30 | Coping strategies questionnaire<br>PROMIS-29<br>LupusPRO<br>PROMIS pain interference instrument       | Baseline, 9 weeks           | 11; W  | Allen, 2021 [53]    |
| P: Follow the Chronic Disease Self-Management Program (CDSMP)<br>C: Usual care                                                                | Other SLE patients              | Intervention: 24<br>Control: -  | Chew Health Literacy Scale<br>Lupus Self-Efficacy Scale<br>Patient activation measure (PAM)<br>SLAQ   | Baseline, 6 weeks, 12 weeks | 11; W  | White, 2021 [54]    |
| <b>Psychological interventions</b>                                                                                                            |                                 |                                 |                                                                                                       |                             |        |                     |

| Intervention/management strategy                                                                                                                                                               | Comparator         | N                                  | Outcome measures                                                                                                                                                                                                                                                | Assessment timepoints                                                       | SD&OA* | Reference           |
|------------------------------------------------------------------------------------------------------------------------------------------------------------------------------------------------|--------------------|------------------------------------|-----------------------------------------------------------------------------------------------------------------------------------------------------------------------------------------------------------------------------------------------------------------|-----------------------------------------------------------------------------|--------|---------------------|
| P: Enrolled in a Brief Supportive–Expressive Group Psychotherapy + “booster sessions” for 3 months<br>C: Usual care                                                                            | Other SLE patients | Intervention: 64<br>Control: 64    | SCL-90-R (Symptom Checklist 90-Revised)<br>SF-36<br>SLAM-R<br>SDI<br>HAQ (Stanford Health Assessment Questionnaire)                                                                                                                                             | Baseline, 12 weeks, and post intervention (6 after and 12 months follow-up) | 11; I  | Dobkin, 2002 [55]   |
| P: Enrolled in a Brief Supportive–Expressive Group Psychotherapy + “booster sessions” for 3 months<br>C: Usual care                                                                            | Other SLE patients | Intervention: 58<br>Control: 66    | SCL90-R<br>SLEDAI<br>SLAM-R<br>SDI<br>Illness Intrusiveness Ratings Scale (IIRS)                                                                                                                                                                                | Baseline, 12 weeks, and post intervention (6 after and 12 months follow-up) | 11; W  | Edworthy, 2003 [56] |
| P: Receive biofeedback-assisted cognitive behavioural treatment (BF/CBT)<br>C: Usual care                                                                                                      | Other SLE patients | Intervention: 32<br>Control: 27+33 | AIMS2-Pain<br>MPI-I<br>CES-D<br>Arthritis Self-Efficacy Scale<br>PSS (Perceived Stress Scale)<br>SF-36<br>SLAM-R<br>SLEDAI                                                                                                                                      | Baseline, 3 months, 9 months                                                | 11; I  | Greco, 2004 [57]    |
| P: Discussion between educator, patient, and partner, after a regular visit for medical care + telephone follow up<br>C: 45-minute video presentation about lupus, and monthly telephone calls | Other SLE patients | Intervention: 64<br>Control: 58    | SF-36<br>SLAQ<br>Profile of mood states (POMS)<br>Self-efficacy–scale<br>modified social support scale developed for arthritis patients<br>8-item subscale of the Medical Interview Satisfaction Scale                                                          | Baseline, 6 months, 12 months                                               | 11; W  | Karlson, 2004 [58]  |
| P: Application of the Cognitive-Behaviour Therapy based on the Chronic Illness Self-Management Course<br>C: Usual care                                                                         | Other SLE patients | Intervention: 11<br>Control: 22    | SF-36<br>HADS<br>CES-D (Centre for epidemiological Studies-Depression scale)<br>CDS (Cognitive Distortion Scale)<br>Fatigue Intensity scale<br>Illness Perceptions Questionnaire revised (IPQ-R)<br>Perceived Stress Scale (PSS)                                | Baseline, weekly and post intervention (2 weeks, 4 months, 12 months)       | 10; I  | Goodman, 2005 [59]  |
| P: Group session focused on psychoeducative and psychotherapeutic elements<br>C: Same intervention 6 months later (waiting group)                                                              | Other SLE patients | Intervention: 26<br>Control: 8     | SCL-90-R (Symptom Checklist 90-Revised)<br>SF-36<br>HADS-D<br>KKG (control convictions relating to illness and health)<br>Freiburg questionnaire on coping with illness (FKV)<br>Self-acceptance registration scale (SESA)<br>Everyday life questionnaire (FAL) | Baseline, 3 months, 6 months, 12 months                                     | 10; I  | Haupt, 2005 [60]    |

| Intervention/management strategy                                                                                                             | Comparator         | N                                   | Outcome measures                                                                                                                                                                                                                                                                                                                                                        | Assessment timepoints                                 | SD&OA* | Reference                      |
|----------------------------------------------------------------------------------------------------------------------------------------------|--------------------|-------------------------------------|-------------------------------------------------------------------------------------------------------------------------------------------------------------------------------------------------------------------------------------------------------------------------------------------------------------------------------------------------------------------------|-------------------------------------------------------|--------|--------------------------------|
| P: Enrolled in a psychosocial group program organized by Community Rehabilitation Network<br>C: Usual care                                   | Other SLE patients | Intervention: 56<br>Control: 20     | General Health Questionnaire (GHQ-30)<br>Rosenberg Self-Esteem Scale (RSE)                                                                                                                                                                                                                                                                                              | Baseline, 6 weeks                                     | 10; R  | Ng, 2007 [61]                  |
| P: Attend 10 Cognitive-Behaviour Therapy sessions<br>C: General recommendations about health lifestyle                                       | Other SLE patients | Intervention: 21<br>Control: 24     | SF-36<br>SLEDAI<br>Stress Vulnerability Inventory<br>Perception of stress (SRLE)<br>BDI<br>STAI-T                                                                                                                                                                                                                                                                       | Baseline, 3-9-15 months                               | 11; W  | Navarrete-Navarrete, 2010 [62] |
| P: Attend 10 Cognitive-Behaviour Therapy sessions<br>C: General recommendations about health lifestyle                                       | Other SLE patients | Intervention: 18<br>Control: 16     | Cohen Perceived Stress Questionnaire<br>Perceived Stress Scale (SRLE)<br>SF-36<br>State-Trait Anxiety Inventory (STAI)<br>Beck Depression Inventory (BDI)                                                                                                                                                                                                               | Baseline, 3-9-15 months                               | 11; W  | Navarrete-Navarrete, 2010 [63] |
| P: Follow three separate CBT modules preinstalled on a CD ROM<br>C: Educational sessions<br>usual care                                       | Other SLE patients | Intervention: 27<br>Control: 10 +16 | McGill Pain Questionnaire – Short Form (SF-MPQ)<br>Behaviour Assessment System for Children (BASC)<br>Self-Perception Profile for Adolescents (SPPA)<br>Multidimensional Health Locus of Control Scales (MHLC)<br>PedsQL<br>SLEDAI<br>Perceived Social Support-Family (PSS-Fa)<br>Perceived Social Support-Friend (PSS-Fr)<br>The Coping Strategies Questionnaire (CSQ) | Baseline, 6 weeks, and post intervention (3-6 months) | 11; W  | Brown, 2012 [64]               |
| P: Cognitive-Behaviour Therapy sessions, supportive therapy, multiple psychological interventions, psychoeducational intervention.<br>C: N/A | N/A                | 6 RCTs                              | Self-rating anxiety scale (SAS)<br>HAMA<br>STAI-T<br>BDI<br>CES-D<br>Self-rating depression scale (SDS)<br>HAMD<br>SLEDAI<br>SLAM<br>SLAQ<br>FSS<br>SF-36<br>Cohen's perceived stress scale (STRESS)<br>Revised Hasstes scale                                                                                                                                           | 6/12 months post intervention                         | 12; R  | Zhang, 2012 [65]               |

| Intervention/management strategy                                                                                    | Comparator                      | N                               | Outcome measures                                                                                                                                                                | Assessment timepoints                                        | SD&OA* | Reference            |
|---------------------------------------------------------------------------------------------------------------------|---------------------------------|---------------------------------|---------------------------------------------------------------------------------------------------------------------------------------------------------------------------------|--------------------------------------------------------------|--------|----------------------|
| P: Follow a modified BI-CBT 8 step program + Skin care education + appearance enhancement workshop<br>C: Usual care | Other SLE patients              | Intervention: 10<br>Control: 5  | Body image in Lupus Scale (BILS)<br>Multidimensional Body Self-Relations<br>Centre for Epidemiological Studies- Depression (CES-D),<br>STAI<br>LupusPRO<br>SELENA-SLEDAI<br>SDI | Baseline, 7 months                                           | 10; I  | Jolly, 2014 [66]     |
| P: Cognitive-Behaviour Therapy sessions, psychoeducational intervention, expressive group psychotherapy.<br>C: N/A  | N/A                             | 6 RCTs                          | BDI<br>SLEDAI<br>FSS<br>SF-36<br>SF-36<br>AIMS2-Pain<br>VAS pain                                                                                                                | Baseline, 6 weeks – 15 months                                | 12; R  | Liang, 2014 [67]     |
| P: Follow the "Better Choice, Better Health" Chronic Disease Self-Management Program (CDSMP)<br>C: Usual care       | Other SLE patients              | Intervention: 15<br>Control: 15 | STAI<br>DHEA and cortisol levels in saliva sample<br>Arthritis Self- Efficacy Scale<br>pain<br>MOS<br>BDI<br>LUP-QOL                                                            | Baseline, 6 weeks and post intervention (4 months)           | 11; W  | Williams, 2014 [68]  |
| P: Participate in a mindfulness group protocol<br>C: N/A: intraindividual assessment                                | N/A; intraindividual assessment | Intervention: 6<br>Control: -   | Qualitative                                                                                                                                                                     | N/A                                                          | 4; W   | Horesh, 2017 [69]    |
| P: Attend a mindfulness-based cognitive therapy<br>C: General recommendations about health lifestyle                | Other SLE patients              | Intervention: 23<br>Control: 23 | GHQ-28<br>SF-36                                                                                                                                                                 | Baseline, 8 weeks, and post intervention (6 months)          | 11; I  | Solati, 2017 [70]    |
| P: Brief group psychoanalytic psychotherapy: 90 min session once a week for 20 weeks.<br>C: Usual care              | Other SLE patients              | Intervention: 43<br>Control: 37 | HADS<br>Coping Strategies Inventory (CSI)<br>SLE Specific Symptom Checklist<br>SLEDAI<br>SLEQOL                                                                                 | Baseline, 20 weeks                                           | 11; I  | Conceição, 2019 [71] |
| P: Attend 10 Cognitive-Behaviour Therapy sessions<br>C: N/A                                                         | N/A                             | 2 studies: 2 RCTs               | SF-36                                                                                                                                                                           | 15 months                                                    | 12; R  | da Hora, 2019 [26]   |
| P: Attend a mindfulness-based cognitive therapy + homework<br>C: N/A: intraindividual assessment                    | N/A; intraindividual assessment | Intervention: 25<br>Control: -  | Korean version of Beck Depression Inventory-II (BDI-II)<br>Beck Anxiety Inventory (BAI)<br>Satisfaction with Life Scale (SWLS)<br>Perceived Stress Scale (PSS)                  | Baseline, 6 weeks, and post intervention (1 month, 2 months) | 10; I  | Kim, 2019 [72]       |

| Intervention/management strategy                                                                                                                                                                                                                    | Comparator         | N                               | Outcome measures                                                                                                           | Assessment timepoints         | SD&OA* | Reference           |
|-----------------------------------------------------------------------------------------------------------------------------------------------------------------------------------------------------------------------------------------------------|--------------------|---------------------------------|----------------------------------------------------------------------------------------------------------------------------|-------------------------------|--------|---------------------|
| P: Eight Sessions of Acceptance and Commitment Therapy (ACT)<br>C: Usual care                                                                                                                                                                       | Other SLE patients | Intervention: 12<br>Control: 12 | Beck's Hopelessness Scale<br>Kessler's Psychological Distress Inventory<br>Krupp's Psychasthenia Inventory                 | Baseline, 2 months            | 10; I  | Sahebari, 2019 [73] |
| P: Receive psychoeducational interventions<br>C: Health education, and nontargeted psychological comfort                                                                                                                                            | Other SLE patients | Intervention: 42<br>Control: 43 | WHOQOL-BREF<br>BDI<br>STAI                                                                                                 | 1 week, 3 months, 6 months    | 11; W  | Xu, 2021 [74]       |
| <b>Dietary therapy and nutrition</b>                                                                                                                                                                                                                |                    |                                 |                                                                                                                            |                               |        |                     |
| P: NCEP Step 2 diet: 30% or less calories from fat (7% from saturated fat, 13% from monounsaturated fat, and 10% from polyunsaturated fat), and < 200 mg of cholesterol per day + maintain their usual level of physical activity.<br>C: Usual care | Other SLE patients | Intervention: 8<br>Control: 8   | Body weight<br>7-day activity recall QOL (VAS)<br>Blood levels of VLDL, HDL, LDL, TG.<br>3-day food record for food intake | Baseline, 6 weeks, 12 weeks   | 11; W  | Shah, 2002 [75]     |
| P: No intervention.<br>Dietary nutrients estimated by a semiquantitative food frequency questionnaire<br>C: No                                                                                                                                      | Other SLE patients | Intervention: 7<br>Control: 189 | Lupus Activity Criteria Count<br>SDI                                                                                       | 4 years                       | 5; R   | Minami, 2003 [76]   |
| P: 1° group: 3g MaxEPA+ 3mg copper<br>2° group: 3g MaxEPA + placebo copper<br>3° group: 3 mg copper+ placebo oil fish<br>C: Placebo                                                                                                                 | Other SLE patients | Intervention: 40<br>Control: 12 | BMI<br>SLAM-R<br>Patient-reported improvement                                                                              | Baseline, 6, 12, and 24 weeks | 11; W  | Duffy, 2004 [77]    |



| Intervention/management strategy                                                                                                                                                                                                                                                                                                                                                         | Comparator                      | N                                 | Outcome measures                                                                                                                                            | Assessment timepoints           | SD&OA* | Reference           |
|------------------------------------------------------------------------------------------------------------------------------------------------------------------------------------------------------------------------------------------------------------------------------------------------------------------------------------------------------------------------------------------|---------------------------------|-----------------------------------|-------------------------------------------------------------------------------------------------------------------------------------------------------------|---------------------------------|--------|---------------------|
| <p>P: Counselling to follow the NCEP Step II diet: &lt; 30% of energy as fat and &lt; 7% as saturated fat, and &lt; 200 mg of cholesterol per day 21.</p> <p>Counselled to limit their intake of sodium (&lt; 2400 mg/day) and refined and added sugars and consume 2–3 servings of skim/low fat dairy foods and ≥ 5 servings of fruits and vegetables per day.</p> <p>C: Usual care</p> | Other SLE patients              | Intervention: 8<br>Control: 7     | 3-day food record at baseline, 6, 12 weeks<br>Changes in nutrient intakes                                                                                   | Baseline, 6 weeks, 12 weeks     | 11; W  | Shah, 2004 [78]     |
| <p>P: Assessing daily use of micronutrient supplements (MS) in SLE patients: Calcium, Vitamin D, Multivitamins (vitamin B6, folic acid, minerals iron, B12, C, E, magnesium, potassium).</p> <p>C: No</p>                                                                                                                                                                                | Other SLE patients              | Intervention: 137<br>Control: 122 | SLAM- R<br>SLEDAI 2K<br>Use of healthcare resources (visit to healthcare professionals, use of diagnostic tests, hospital emergency visits)<br>SF-36<br>SDI | N/A                             | 1; I   | Aghdassi, 2010 [79] |
| <p>P: No intervention.</p> <p>Dietary nutrients estimated by a semiquantitative food frequency questionnaire (Vitamin B6, Vitamin B12, folate, total dietary fibre, soluble dietary fibre, insoluble dietary fibre).</p> <p>C: No</p>                                                                                                                                                    | Other SLE patients              | Intervention: 216<br>Control: -   | Food frequency questionnaire (FFQ)<br>Lupus Activity Criteria Count                                                                                         | Baseline (1995), 5 years (2000) | 5; R   | Minami, 2011 [80]   |
| <p>P: Reduced calorie diet (1200/1500 kcal/d) [combined with increasing exercise from 100 to 300 min/w]</p> <p>C: N/A: intraindividual assessment</p>                                                                                                                                                                                                                                    | N/A; intraindividual assessment | Intervention: 15<br>Control: -    | BMI<br>Waist circumference<br>Self-reported physical activity                                                                                               | Baseline, 16 weeks              | 10; W  | Otto, 2011 [6]      |

| Intervention/management strategy                                                                                                                                                                                                                                                                 | Comparator         | N                                 | Outcome measures                                                                                                    | Assessment timepoints | SD&OA* | Reference             |
|--------------------------------------------------------------------------------------------------------------------------------------------------------------------------------------------------------------------------------------------------------------------------------------------------|--------------------|-----------------------------------|---------------------------------------------------------------------------------------------------------------------|-----------------------|--------|-----------------------|
| <p>P: Low GI diet whereby carbohydrate intake was limited to 45 g per day of low GI food, without restricting the consumption of fat and protein</p> <p>C: Low calorie diet</p>                                                                                                                  | Other SLE patients | Intervention: 11<br>Control: 12   | Weight, BMI<br>Waist circumference<br>BILAG<br>ECLAM<br>SLEDAI<br>Fatigue Severity Scale<br>PSQI                    | Baseline, 6 weeks     | 11; W  | Davies, 2012 [81]     |
| <p>P: No intervention.</p> <p>Administration of food frequency questionnaire (FFQ) + study of fatty acid content and plaque occurrence</p> <p>C: No</p>                                                                                                                                          | Other SLE patients | Intervention: 114<br>Control: 122 | Food frequency questionnaire (FFQ)<br>SLAM<br>SLEDAI<br>Intima-media thickness (IMT)<br>Occurrence of plaque<br>SDI | Immediate results     | 1; I   | Elkan, 2012 [82]      |
| <p>P: With each meal, each patient received 1 capsule for 3 months, containing 500 mg turmeric (22.1 mg was the active ingredient curcumin)</p> <p>C: Placebo</p>                                                                                                                                | Other SLE patients | Intervention: 12<br>Control: 12   | Haematuria<br>Proteinuria<br>Systolic blood pressure<br>C3, C4, anti-dsDNA                                          | 3 months              | 11; I  | Khajehdehi, 2012 [83] |
| <p>P: CVD-PCP counselling program= Phase 1: assessment of CVD risk factor on patients</p> <p>Phase 2: education on cardiovascular diseases and discussion on prevention strategies. Followed by a patient-centred nutrition counselling to attend at least once a month</p> <p>C: Usual care</p> | Other SLE patients | Intervention: 41<br>Control: 30   | Weight, BMI<br>Waist circumference<br>Changes in nutrient intake                                                    | Baseline, 6 months    | 10; I  | Everett, 2015 [84]    |
| <p>P: 1000 mg of green tea extract</p> <p>C: Placebo</p>                                                                                                                                                                                                                                         | Other SLE patients | Intervention: 32<br>Control: 36   | SLEDAI<br>SF-36                                                                                                     | Baseline, 12 weeks    | 11; I  | Shamekhi, 2017 [85]   |

| Intervention/management strategy                                                                                                                                                                                                            | Comparator         | N                                | Outcome measures                                                                                                                                                             | Assessment timepoints                          | SD&OA* | Reference                   |
|---------------------------------------------------------------------------------------------------------------------------------------------------------------------------------------------------------------------------------------------|--------------------|----------------------------------|------------------------------------------------------------------------------------------------------------------------------------------------------------------------------|------------------------------------------------|--------|-----------------------------|
| P: Health coaching (weekly calls to educate and implement changes based on data analysis)<br>C: Usual care                                                                                                                                  | Other SLE patients | Intervention: 20<br>Control: 20  | FACIT-Fatigue<br>Brief Pain Inventory-Short form<br>LupusQoL                                                                                                                 | Baseline, 4 weeks, 8 weeks, 12 weeks, 16 weeks | 11; W  | Rothman, 2018 [86]          |
| P: No intervention.<br>Good adherence (>10 points) to Med Diet (14-item questionnaire on food consumption frequency and habits)<br>C: No                                                                                                    | Other SLE patients | Intervention: 143<br>Control: 16 | BMI, fat percentage<br>Lipid profile<br>Ankle-brachial index, BP<br>Comorbidities: T2DM, AHT, dyslipidaemia.<br>hsCRP<br>Homocysteine<br>SLEDAI<br>Anti-dsDNA, C3, C4<br>SDI | N/A                                            | 1; R   | Pocovi-Gerardino, 2021 [87] |
| <b>Complementary and alternative medicine</b>                                                                                                                                                                                               |                    |                                  |                                                                                                                                                                              |                                                |        |                             |
| P: Administration of Traditional Chinese Medicine (cicimifuga rhizome 9g + oldenlandia herb 18 h, southernwood 15 g, red peony root 12 g + moutan bark 12 g+ rehmannia root 15 g+ turtle shell 12g etc)<br>C: Usual care (Western medicine) | Other SLE patients | Intervention: 85<br>Control: 85  | Serum lipids and lipoproteins (TC, TG, HDL-C, LDL-C, VLDL-C, ApoA)                                                                                                           | Baseline, 2 years                              | 11; W  | Wen, 2007 [88]              |
| P: Acupuncture (modified Feng 1985 protocol)<br>C: Minimal needling, usual care                                                                                                                                                             | Other SLE patients | Intervention: 103<br>Control: 89 | FSS<br>SF-36 VT<br>AIMS2-Pain MPI<br>SF-36 BP<br>SLEDAI<br>SLAM-R<br>PGA<br>SDI<br>IL-1b, IL-6                                                                               | Baseline, 5 weeks                              | 11; I  | Greco, 2008 [89]            |
| P: Being CAT (complementary and alternative therapies) users<br>C: No                                                                                                                                                                       | Other SLE patients | Intervention:<br>Control:        | SF-36<br>SDI                                                                                                                                                                 | N/A                                            | 1; R   | Alvarez-Nemegyei, 2009 [90] |
| P: Traditional Chinese Medicine: Dan-Chi-Liu-Wei combination (granules)<br>C: Usual care + 10% Traditional Chinese medicine                                                                                                                 | Other SLE patients | Intervention:<br>Control:        | SLEDAI-based<br>SLEDAI<br>anti-dsDNA, C3, C3                                                                                                                                 | Baseline, 3 months, 6 months                   | 11; I  | Liao, 2011 [91]             |

| Intervention/management strategy                                                                                                                                                                                                                                                                                                                                                     | Comparator                      | N                               | Outcome measures                                                                                                                | Assessment timepoints                  | SD&OA* | Reference            |
|--------------------------------------------------------------------------------------------------------------------------------------------------------------------------------------------------------------------------------------------------------------------------------------------------------------------------------------------------------------------------------------|---------------------------------|---------------------------------|---------------------------------------------------------------------------------------------------------------------------------|----------------------------------------|--------|----------------------|
| P: Zi Shen Qing (combination of 6 herbs)<br>C: Hydroxychloroquine 100 mg/12h PO                                                                                                                                                                                                                                                                                                      | Other SLE patients              | Intervention: 42<br>Control: 42 | SLEDAI-2K<br>Chinese Medicine Syndromes (CMSs)<br>Prednisone dose<br>C3, C4, anti-dsDNA, IgG, sIL-2R, NK-cell activity          | Baseline, 12 weeks                     | 11; I  | Linda, 2013 [92]     |
| <b>Photoprotection</b>                                                                                                                                                                                                                                                                                                                                                               |                                 |                                 |                                                                                                                                 |                                        |        |                      |
| P: 3 different sunscreens:<br><br>Sunscreen A: UVB: Octocrylene. UVA: Mexoryl SX, Mexoryl XL, Parsol 1789. TiO2), SPF >60<br><br>Sunscreen B: (UVB: Eusolex 6300, Parsol MCX, Uvinul T150, Neohelipan. UVA: Parsol 1789. TiO2), SPF >75<br><br>Sunscreen C: (Eusolex 6300, Parsol MCX, Uvinul T150<br><br>UVA: Parsol 1789. TiO2) SPF= 35]<br><br>C: N/A: intraindividual assessment | N/A; intraindividual assessment | Intervention: 11<br>Control: -  | Photoprovocation test<br>Skin biopsies after treatment<br>Semiquantitative RT-PCR for ICAM-1 mRNA expression                    | Up to 4 weeks after irradiation        | 10; R  | Stege, 2000 [93]     |
| P: 2 mg/cm <sup>2</sup> sunscreen Anthelios W30 La Roche-Posay (parsol 1789, uvinul N539, uvinul T150, mexoryl XL, titanium dioxide)<br><br>C: N/A: intraindividual assessment                                                                                                                                                                                                       | N/A; intraindividual assessment | Intervention: 66<br>Control: -  | Photoprovocation test<br>Photosensitivity, skin lesions                                                                         | Days 2, 3, and 4 and 1, 2, and 3 weeks | 5; W   | Herzinger, 2004 [94] |
| P: 9-week course of low-dose UVA1 phototherapy<br><br>C: N/A: intraindividual assessment                                                                                                                                                                                                                                                                                             | N/A; intraindividual assessment | Intervention: 9<br>Control: -   | SLEDAI<br>Subjective clinical scoring<br>Subjective clinical scoring<br>Serum levels of IFN-gamma, IL-4<br>T- cell populations, | Baseline, 9 weeks                      | 10; I  | Szegedi, 2005 [95]   |

| Intervention/management strategy                                                                                                                                                          | Comparator                                   | N                                | Outcome measures                                                                                                                                                                                                            | Assessment timepoints                 | SD&OA* | Reference                |
|-------------------------------------------------------------------------------------------------------------------------------------------------------------------------------------------|----------------------------------------------|----------------------------------|-----------------------------------------------------------------------------------------------------------------------------------------------------------------------------------------------------------------------------|---------------------------------------|--------|--------------------------|
| P: Broad-spectrum liposomal sunscreen 20 min prior to a combined standardized UVA/UVB irradiation<br>C: Unprotected skin, sunscreen use                                                   | Healthy controls, intraindividual assessment | Intervention: 20<br>Control: 10  | Immunohistological analysis for immune cell subpopulations.                                                                                                                                                                 | Baseline, 24 h, 72 h                  | 10; I  | Zahn, 2014 [96]          |
| P: Photoprotection awareness<br>C: No                                                                                                                                                     | Other SLE patients                           | Intervention: 205<br>Control: 17 | SLEDAI-2K<br>SDI<br>Anti-dsDNA, ANA, Ro, La, ENA<br>C3, C4<br>ESR                                                                                                                                                           | N/A                                   | 1; I   | Abdul Kadir, 2018 [97]   |
| <b>Healthcare models</b>                                                                                                                                                                  |                                              |                                  |                                                                                                                                                                                                                             |                                       |        |                          |
| P: Analysis (coding) of active patient-physician communication from audiotaped routine visits<br>C: N/A: intraindividual assessment                                                       | N/A; intraindividual assessment              | Intervention: 79<br>Control: -   | SLEDAI<br>HAQ<br>SDI                                                                                                                                                                                                        | Baseline, after a median of 4.7 years | 10; I  | Ward, 2003 [98]          |
| P: Application of the continuous care model (CCM) [Orientation, sensitization, control]<br>C: N/A: intraindividual assessment                                                             | N/A; intraindividual assessment              | Intervention: 34<br>Control: -   | Knowledge questionnaires at baseline<br>SF-36                                                                                                                                                                               | Baseline, 3 months                    | 10; I  | Sahebalzamani, 2017 [99] |
| P: Transitional care plan (structural assessments and corresponding interventions based on the Omaha System) + telephone follow up 2, 3, 6, and 10 weeks after discharge<br>C: Usual care | Other SLE patients                           | Intervention: 64<br>Control: 61  | SLEDAI-2K<br>SF-36<br>Exercise Self-Care Agency scale (ESCA)<br>N° readmissions 30, 60, and 90 days                                                                                                                         | Baseline, 3 months                    | 11; I  | Xie, 2018 [100]          |
| P: Multidisciplinary care (from a physician, pharmacist, and nurse) in addition to routine clinical follow up<br>C: Usual care                                                            | Other SLE patients                           | Intervention: 42<br>Control: 40  | SLEDAI-2K<br>SIMS (Satisfaction with Information about Medicines Scale)<br>EQ-5D-3L questionnaire for health status<br>CQR (Compliance Questionnaire of Rheumatology)<br>BMQ (Beliefs about Medicines Questionnaire)<br>SDI | Baseline, 12 months                   | 11; W  | Zhang, 2019 [101]        |

| Intervention/management strategy                                                                                                                                                   | Comparator                      | N                                | Outcome measures                                                                                                                                    | Assessment timepoints                               | SD&OA* | Reference              |
|------------------------------------------------------------------------------------------------------------------------------------------------------------------------------------|---------------------------------|----------------------------------|-----------------------------------------------------------------------------------------------------------------------------------------------------|-----------------------------------------------------|--------|------------------------|
| <b>Laser treatment</b>                                                                                                                                                             |                                 |                                  |                                                                                                                                                     |                                                     |        |                        |
| P: Treatment with pulsed dye laser (PDL) on discoid lesions<br>C: N/A: intraindividual assessment                                                                                  | N/A; intraindividual assessment | Intervention: 12<br>Control: -   | Pain VAS scale<br>Cutaneous Lupus Erythematosus Disease Area and Severity Index (CLASI)<br>Cosmetic VAS scale                                       | N/A                                                 | 10; R  | Erceg, 2009 [102]      |
| P: Treatment with pulsed dye laser (PDL) on discoid lesions<br>C: N/A: intraindividual assessment                                                                                  | N/A; intraindividual assessment | Intervention: 9<br>Control: -    | Erythema index (EI) and Texture index (from mCLASI)                                                                                                 | Baseline, week 4, week 8, week 12, week 16, week 24 | 10; I  | Rerknimitr, 2019 [103] |
| <b>Social support</b>                                                                                                                                                              |                                 |                                  |                                                                                                                                                     |                                                     |        |                        |
| P: Attend support group<br>C: No                                                                                                                                                   | Other SLE patients              | Intervention: 34<br>Control: 71  | SF-36 (PCS and MCS)<br>SLAM                                                                                                                         | N/A                                                 | 1; R   | Dorsey, 2004 [104]     |
| P: No intervention (exposure to illness uncertainty, social support, coping modes through questionnaires)-being hospitalized for over a week<br>C: N/A: intraindividual assessment | N/A; intraindividual assessment | Intervention: 200<br>Control: -  | Mishel Uncertainty in Illness Scale (MUIS)<br>Social Support Rating Scale (SSRS)<br>Medical Coping Modes Questionnaires (MCMQ)                      | N/A                                                 | 1; R   | Li, 2019 [105]         |
| <b>Others</b>                                                                                                                                                                      |                                 |                                  |                                                                                                                                                     |                                                     |        |                        |
| P: Meditation instruction + meditation practice<br>C: Usual care                                                                                                                   | Other SLE patients              | Intervention: 15<br>Control: 15  | SF- 36<br>Normetanephrine levels<br>Heart rate variability                                                                                          | Baseline, 24 weeks                                  | 10; I  | Bantornwan, 2014 [106] |
| P: Completing a Home Cleaning and Maintenance Product list (HCMPL) questionnaire<br>C: No                                                                                          | Other SLE patients              | Intervention: 80<br>Control: 41  | SRF (Self-reported flare) risk                                                                                                                      | N/A                                                 | 2; I   | Squance, 2015 [107]    |
| P: No intervention.<br>Self-reported smoking status (smoker: one cigarette per day for three consecutive months)<br>C: No                                                          | Other SLE patients              | Intervention: 65<br>Control: 665 | SLEDAI (score and domains)<br>Autoantibodies (dsDNA, anti-Smith, anti-SSA/Ro, anti-SSB/La, anti-ribonucleoprotein (RNP) and anti-ribosomal RNP, APL | Immediate results                                   | 1; R   | Xu, 2015 [108]         |

| Intervention/management strategy                                                                                                               | Comparator                      | N                                                                                | Outcome measures                                                                                                                                                       | Assessment timepoints                    | SD&OA* | Reference             |
|------------------------------------------------------------------------------------------------------------------------------------------------|---------------------------------|----------------------------------------------------------------------------------|------------------------------------------------------------------------------------------------------------------------------------------------------------------------|------------------------------------------|--------|-----------------------|
| P: 1° group= warm shower / 2° group= warm footbath with adding of 2 cups of Epsom salt<br>C: Warm shower                                       | Other SLE patients              | Intervention: 60<br>Control: 30                                                  | FSS                                                                                                                                                                    | Baseline, day 3, day 5, day 7            | 10; R  | Abdelaziz, 2020 [109] |
| P: Training of the patient on how to use the cosmetic camouflage. Letting the patient use camouflage based on personal needs.<br>C: Usual care | Other SLE patients              | Intervention: 28<br>Control: 15                                                  | Hospital Anxiety and Depression Scale (HADS)<br>SLEDAI-2K<br>SDI<br>SLEQoL<br>Rosenberg self-esteem scale<br>DLQI (Dermatology Life Quality Index)                     | Baseline, 12 weeks, 21 weeks             | 11; W  | Oliveira, 2020 [110]  |
| P: Transcutaneous auricular vagus nerve stimulation (taVNS)<br>C: Sham-stimulation                                                             | Other SLE patients              | Intervention: 12<br>Control: 6                                                   | VAS scale for pain<br>FACIT-F<br>PtGA and PGA<br>Tender and swollen joint counts<br>Serum level of: IFN $\alpha$ , IL-1, IL-8, IL-10, and tumour necrosis factor (TNF) | Baseline, day 5, day 12                  | 11; I  | Aranow, 2021 [111]    |
| <b>SSc</b>                                                                                                                                     |                                 |                                                                                  |                                                                                                                                                                        |                                          |        |                       |
| <b>Physical exercise and physical activity</b>                                                                                                 |                                 |                                                                                  |                                                                                                                                                                        |                                          |        |                       |
| P: Mouth stretching exercise and oral augmentation exercise<br>C: N/A: intraindividual assessment                                              | N/A; intraindividual assessment | Intervention: 10 selected among 35 patients with MMO $\leq$ 30mm<br>Control: N/A | Maximal Mouth opening (MMO)                                                                                                                                            | Baseline, 18 weeks                       | 10; R  | Pizzo, 2003 [112]     |
| P: Paraffin bath and hand exercises<br>C: N/A: intraindividual assessment                                                                      | N/A; intraindividual assessment | Intervention: 17<br>Control: N/A                                                 | Hand function<br>Skin lesions (skin sclerosis)<br>Pain                                                                                                                 | Baseline, end of intervention at 1 month | 10; I  | Sandqvist, 2004 [113] |
| P: Self-administrated stretching<br>C: No intervention                                                                                         | Healthy controls                | Intervention: 45<br>Control: 21 healthy controls                                 | Range of movement (ROM)<br>HAQ                                                                                                                                         | Baseline, 1 month, 1 year                | 10; I  | Mugii, 2006 [114]     |
| P: Individualised rehabilitation program followed by at-home exercise<br>C: Usual care                                                         | Other SSc patients              | Intervention: 16<br>Control: 17                                                  | HAQ DI<br>Short form -36(SF-36)<br>St George's Respiratory Questionnaire (SGRQ)<br>HAMIS                                                                               | Baseline, 4 months                       | 10; R  | Antonioli, 2009 [115] |

| Intervention/management strategy                                                                                                            | Comparator                      | N                                                         | Outcome measures                                                                                                | Assessment timepoints                                                  | SD&OA* | Reference                 |
|---------------------------------------------------------------------------------------------------------------------------------------------|---------------------------------|-----------------------------------------------------------|-----------------------------------------------------------------------------------------------------------------|------------------------------------------------------------------------|--------|---------------------------|
| P: Connective tissue massage, Mc Mennell joint manipulation and home exercise<br>C: Home exercise programme alone                           | Other SSc patients              | Intervention: 20<br>Control: 20                           | Fist closure<br>Hand Mobility in Scleroderma (HAMIS)<br>Cochin hand functional disability scale (CHFS)<br>SF-36 | Baseline, 9 weeks                                                      | 11; I  | Bongi, 2009 [116]         |
| P: Tailored rehabilitation program with manual therapy and exercise<br>C: Educational advice and information about SSc                      | Other SSc patients              | Intervention: 10<br>Control: 10                           | global health<br>hand and face conditions:                                                                      | Baseline, 9 weeks (end of intervention), 18 weeks                      | 11; W  | Maddali Bongi, 2009 [117] |
| P: Aerobic exercise programme<br>C: Aerobic exercise programme                                                                              | Healthy controls                | Intervention: 7<br>Control: 7                             | VO2max                                                                                                          | Baseline, 8 weeks                                                      | 10; I  | Oliveira, 2009 [118]      |
| P: Combined connective tissue massage, Kabat's technique, kinesitherapy and home mimic exercise program<br>C: Home exercise programme alone | Other SSc patients              | Intervention: 20<br>Control: 20                           | Mouth Opening<br>HAQ<br>SF-36                                                                                   | Baseline, end of treatment (9 weeks), 9 weeks post treatment follow up | 11; I  | Maddali Bongi, 2011 [119] |
| P: Supervised, treadmill, treadmill (aerobic), stretching exercise<br>C: N/A: intraindividual assessment                                    | N/A; intraindividual assessment | Intervention: 11<br>Control: N/A                          | Strength & muscle function assessment<br>Anaerobic threshold<br>Respiratory compensation point<br>Peak exercise | Baseline, week 12                                                      | 10; R  | Pinto, 2011 [120]         |
| P: Multi-faceted oral health intervention<br>C: Usual care                                                                                  | Other SSc patients              | Intervention: 26<br>Control: 22                           | Löe-Silness gingival index (GI)                                                                                 | Baseline, 3 months, 6 months                                           | 11; W  | Yuen, 2011 [121]          |
| P: Orofacial exercise + multifaceted oral health intervention<br>C: Usual care                                                              | Other SSc patients              | Intervention: 26<br>Control: 22                           | Oral aperture                                                                                                   | Baseline, 3 months, 6 months                                           | 11; I  | Yuen, 2012 [122]          |
| P: Stretching and mobility exercises at home using a newly developed telemedicine system<br>C: Home kinesiotherapy protocol                 | SSc patients and RA-patients    | Intervention: 20 (10 with RA)<br>Control: 20 (10 with RA) | Dreiser's index (functional index of hand)<br>HAMIS<br>HAQ                                                      | Baseline, after 6w and 12w                                             | 11; W  | Piga, 2014 [123]          |



| Intervention/management strategy                                                                                                                                                                                     | Comparator                      | N                                 | Outcome measures                                                                                                                                                             | Assessment timepoints                                | SD&OA* | Reference                |
|----------------------------------------------------------------------------------------------------------------------------------------------------------------------------------------------------------------------|---------------------------------|-----------------------------------|------------------------------------------------------------------------------------------------------------------------------------------------------------------------------|------------------------------------------------------|--------|--------------------------|
| P: Muscle strength<br>C: No intervention                                                                                                                                                                             | Healthy controls                | Intervention: 20<br>Control: 20   | Isometric dynamometry<br>Surface electromyography<br>Bioelectrical impedance analysis<br>Pulmonary function testing<br>Six-minute walking distance (6MWD)<br>SF-36<br>HAQ-DI | Immediate results                                    | 1; R   | Lima, 2015 [124]         |
| P: Hand stretching exercise and weekly phone call with occupational therapist, with specific timetable for when to conduct exercise<br>C: Hand stretching exercise and weekly phone call with occupational therapist | Other SSc patients              | Intervention: 15<br>Control: 16   | COPM                                                                                                                                                                         | Baseline, 1 month and 3 months (end of intervention) | 11; I  | Stefanantoni, 2016 [125] |
| P: Hand stretching & hip exercise, ergotherapy, thermal & mud bath, whirlpool therapy, soft tissue massage of the hands and joints<br>C: Same as intervention, but excluding treatment of the hands.                 | Other SSc patients              | Intervention: 31<br>Control: 22   | HAQ<br>DASH<br>HAI<br>CHFT<br>VAS pain                                                                                                                                       | Baseline, 3 weeks (end of intervention), 6 months    | 10; R  | Horváth, 2017 [126]      |
| P: Personalized physical therapy session with physiotherapist and occupational therapist<br>C: Usual care                                                                                                            | Other SSc patients              | Intervention: 110<br>Control: 108 | HAQ                                                                                                                                                                          | Baseline, 12 months                                  | 11; R  | Rannou, 2017 [127]       |
| P: Exercise habits<br>C: No intervention                                                                                                                                                                             | Other SSc patients              | Intervention: 389<br>Control: 363 | HAQ-DI<br>PROMIS-29                                                                                                                                                          | Immediate results                                    | 5; I   | Azar, 2018 [128]         |
| P: Manual therapy and physiotherapy, three weeks every year for three years<br>C: N/A: intraindividual assessment                                                                                                    | N/A; intraindividual assessment | Intervention: 43<br>Control: N/A  | HAQ DI                                                                                                                                                                       | Baseline, once a year for three years                | 10; R  | Brignoli, 2018 [129]     |

| Intervention/management strategy                                                                                                                                       | Comparator                      | N                                                       | Outcome measures                                                          | Assessment timepoints                                         | SD&OA* | Reference               |
|------------------------------------------------------------------------------------------------------------------------------------------------------------------------|---------------------------------|---------------------------------------------------------|---------------------------------------------------------------------------|---------------------------------------------------------------|--------|-------------------------|
| <p>P: Intervention 1: HIIT (cycling) twice a week for 12 weeks</p> <p>Intervention 2: HIIT (arm cranking) twice a week for 12 weeks</p> <p>C: No training protocol</p> | Other SSc patients              | Intervention 1: 11<br>Intervention 2: 11<br>Control: 12 | CVC<br>$\Delta$ TcpO2<br>VO2max<br>6MWT<br>EQ-5D-5 L                      | Baseline, 12 weeks                                            | 11; W  | Mitropoulos, 2018 [130] |
| <p>P: Thermal modalities, tissue mobilisation, and upper extremity exercises with occupational therapist</p> <p>C: N/A: intraindividual assessment</p>                 | N/A; intraindividual assessment | Intervention: 21<br>Control: N/A                        | QuickDASH<br>PROMIS                                                       | Baseline, 4 weeks, 8 weeks (= end of intervention)            | 10; R  | Murphy, 2018 [131]      |
| <p>P: Paraffin bath and hand exercises</p> <p>C: Hand exercises without wax bath</p>                                                                                   | Other SSc patients              | Intervention: 17<br>Control: 19                         | HAMIS                                                                     | Baseline, end of intervention (9 weeks), 8-week follow-up     | 11; I  | Gregory, 2019 [132]     |
| <p>P: Paraffin bath and hand exercises</p> <p>C: Water bath, hand exercise</p>                                                                                         | Other SSc patients              | Intervention: 43<br>Control: 43                         | HAMIS                                                                     | Baseline, post intervention at 6 month and 12-month follow-up | 11; I  | Kristensen, 2019 [133]  |
| <p>P: Home based self-management programme that consisted of a booklet and information about SSc</p> <p>C: N/A: intraindividual assessment</p>                         | N/A; intraindividual assessment | Intervention: 22<br>Control: N/A                        | VAS (pain)<br>CHFS                                                        | Baseline, 4 weeks and end of intervention (8 weeks)           | 10; R  | Landim, 2019 [134]      |
| <p>P: Combined programme with HIIT and resistance training, twice weekly for 12 weeks</p> <p>C: No intervention</p>                                                    | Other SSc patients              | Intervention: 16<br>Control: 16                         | CVC<br>$\Delta$ TcpO2<br>VO2max                                           | Baseline, 3 months, 6 months                                  | 11; W  | Mitropoulos, 2019 [135] |
| <p>P: Tai Chi</p> <p>C: Home exercise</p>                                                                                                                              | Other SSc patients              | Intervention: 14<br>Control: 14                         | Trunk lateral test<br>Berg balance scale<br>Pittsburgh sleep quality test | Baseline, 10 weeks                                            | 11; W  | Cetin, 2020 [136]       |

| Intervention/management strategy                                                                                                                                                           | Comparator                      | N                                | Outcome measures                                                                                                                                        | Assessment timepoints                                                                                                                                                                                                | SD&OA* | Reference                 |
|--------------------------------------------------------------------------------------------------------------------------------------------------------------------------------------------|---------------------------------|----------------------------------|---------------------------------------------------------------------------------------------------------------------------------------------------------|----------------------------------------------------------------------------------------------------------------------------------------------------------------------------------------------------------------------|--------|---------------------------|
| P: Home-based aerobic exercise (stationary bike), muscular endurance training (upper limbs) and stretching (hands)<br>C: Usual care                                                        | Other SSc patients              | Intervention: 22<br>Control: 22  | 6MWT<br>Quadriceps- and biceps strength<br>Hand grip                                                                                                    | Baseline, 6 months                                                                                                                                                                                                   | 11; I  | Filippetti, 2020 [137]    |
| P: Self-management programme composed of a booklet<br>C: No intervention                                                                                                                   | Other SSc patients              | Intervention: 40<br>Control: 17  | Difference in finger-to-palm distance ( $\Delta$ FTP)<br>grip, tip and key pinch strength<br>CHFS<br>Scleroderma Health Assessment Questionnaire (SHAQ) | Baseline, 24 weeks                                                                                                                                                                                                   | 10; I  | Landim, 2020 [138]        |
| P: Orofacial exercise programme followed by oral hygiene care advice<br>C: Oral hygiene care advice followed by orofacial exercise programme                                               | Other SSc patients              | Intervention: 28<br>Control: 28  | MMO                                                                                                                                                     | Baseline, one month, two months                                                                                                                                                                                      | 11; I  | Cüzdan, 2021 [139]        |
| P: High-intensity interval exercise (HIIT)<br>C: N/A: intraindividual assessment                                                                                                           | N/A; intraindividual assessment | Intervention: 11<br>Control: N/A | Functional ability<br>Respiratory muscle strength<br>SSc-specific HAQ-DI                                                                                | Baseline, 12 weeks                                                                                                                                                                                                   | 10; I  | Defi, 2021 [140]          |
| P: Booklet, isometric hand exercise and self-administrated stretching<br>C: Booklet alone                                                                                                  | Other SSc patients              | Intervention: 32<br>Control: 30  | HAMIS<br>Duruoz Hand Index (DHI)<br>HAQ-DI<br>Handgrip strength<br>SF-36<br>mRSS                                                                        | Baseline, 4 weeks                                                                                                                                                                                                    | 11; I  | Gokcen, 2021 [141]        |
| P: Home exercises for temporomandibular joint, mimic, masticatory and cervical spine muscles<br>C: Home exercises and combined physiotherapeutic procedures performed by a physiotherapist | Other SSc patients              | Intervention: 25<br>Control: 22  | Mouth Handicap in Systemic Sclerosis Questionnaire (MHISS)<br>Helkimo anamnestic and dysfunction index<br>Skin score                                    | Skin score, MHISS, Helkimo anamnestic and dysfunction index at end of treatment, T1 (after 12w), and post treatment follow up of 8w, T2 and comparison of differences of effect between intervention & control at T1 | 11; W  | Maddali Bongi, 2021 [142] |
| P: Intensive occupational therapy and app-delivered home exercise.<br>C: App alone                                                                                                         | Other SSc patients              | Intervention: 16<br>Control: 16  | QuickDASH hand disability<br>PROMIS                                                                                                                     | QuickDASH hand disability at 8w and 18w                                                                                                                                                                              | 11; W  | Murphy, 2021 [143]        |

| Intervention/management strategy                                                                                                    | Comparator                      | N                                                                   | Outcome measures                                                                                                                                                                           | Assessment timepoints                                              | SD&OA* | Reference              |
|-------------------------------------------------------------------------------------------------------------------------------------|---------------------------------|---------------------------------------------------------------------|--------------------------------------------------------------------------------------------------------------------------------------------------------------------------------------------|--------------------------------------------------------------------|--------|------------------------|
| <b>Patient education and self-management</b>                                                                                        |                                 |                                                                     |                                                                                                                                                                                            |                                                                    |        |                        |
| P: Educational programme<br>C: N/A: intraindividual assessment                                                                      | N/A; intraindividual assessment | Intervention: 6<br>Control: N/A                                     | Self-efficacy pain subscale (SEP)<br>Self-efficacy function subscale (SEF)<br>Self-efficacy other symptoms subscale (SEOS)                                                                 | Baseline 10 weeks (end of intervention) 22 weeks                   | 10; I  | Samuelson, 2000 [144]  |
| P: Educational programme<br>C: Educational programme                                                                                | SLE-patients                    | Intervention: 5 with SSC, 5 with SLE<br>Control: N/A                | Results of interview                                                                                                                                                                       | Immediate results (interview study)                                | 9; R   | Brown, 2004 [36]       |
| P: Multidisciplinary disease management programme<br>C: N/A: intraindividual assessment                                             | N/A; intraindividual assessment | Intervention: 41<br>Control: N/A                                    | ANOVAs for cognition and depression                                                                                                                                                        | Baseline, 6 weeks post intervention and 6 months post intervention | 10; R  | Kwakkenbos, 2011 [145] |
| P: Mail-delivered self-management programme<br>C: N/A: intraindividual assessment                                                   | N/A; intraindividual assessment | Intervention: 62 (49 completers, 13 non-completers)<br>Control: N/A | Self-efficacy, domain pain<br>Fatigue scale<br>CES-D<br>HAQ<br>Swindon foot and ankle questionnaire (SFAQ)                                                                                 | Baseline, end of treatment (3-4 months)                            | 10; I  | Poole, 2013 [146]      |
| P: Self-management website with 10 modules<br>C: N/A: intraindividual assessment                                                    | N/A; intraindividual assessment | Intervention: 16<br>Control: N/A                                    | Health Education Impact Questionnaire (heiQ)<br>Self-Efficacy (SE) scale<br>Patient Activation Measure (PAM)<br>Center for Epidemiologic Studies Depression Scale (CES-D)<br>VAS (Fatigue) | Baseline, 12 weeks                                                 | 10; R  | Poole, 2014 [147]      |
| P: Informative meeting followed by occupational therapy<br>C: Informative meeting alone                                             | Other SSC patients              | Intervention: 10<br>Control: 10                                     | HAQ                                                                                                                                                                                        | Baseline, 24 weeks                                                 | 10; R  | Zanatta, 2017 [148]    |
| P: Self-management website<br>C: Book                                                                                               | Other SSC patients              | Intervention: 134<br>Control: 133                                   | PROMIS<br>EQ5D                                                                                                                                                                             | Baseline, 16 weeks                                                 | 11; W  | Khanna, 2019 [149]     |
| P: Home based self-management programme that consisted of a booklet and information about SSc<br>C: N/A: intraindividual assessment | N/A; intraindividual assessment | Intervention: 22<br>Control: N/A                                    | VAS (pain)<br>CHFS                                                                                                                                                                         | Baseline, 4 weeks and end of intervention (8 weeks)                | 10; R  | Landim, 2019 [134]     |

| Intervention/management strategy                                                                                                                                                                     | Comparator                      | N                                | Outcome measures                                                                                                                                     | Assessment timepoints                             | SD&OA* | Reference             |
|------------------------------------------------------------------------------------------------------------------------------------------------------------------------------------------------------|---------------------------------|----------------------------------|------------------------------------------------------------------------------------------------------------------------------------------------------|---------------------------------------------------|--------|-----------------------|
| P: Scleroderma Support group Leader Education (SPIN-SSLED) programme<br>C: N/A: intraindividual assessment                                                                                           | N/A; intraindividual assessment | Intervention: 10<br>Control: N/A | Scleroderma Support Group Leader Self-Efficacy Scale (SSGLSS)                                                                                        | Baseline, 3 months                                | 10; R  | Thombs, 2019 [150]    |
| P: Face-to-face training + standard information programme (i.e., brochures, DVD)<br>C: Educational materials alone                                                                                   | Other SSC patients              | Intervention: 31<br>Control: 32  | Mouth Opening                                                                                                                                        | Baseline, 12 months                               | 11; I  | Uras, 2019 [151]      |
| P: Self-management programme composed of a booklet<br>C: No intervention                                                                                                                             | Other SSC patients              | Intervention: 40<br>Control: 17  | Difference in finger-to-palm distance ( $\Delta$ FTP) grip, tip and key pinch strength<br>CHFS<br>Scleroderma Health Assessment Questionnaire (SHAQ) | Baseline, 24 weeks                                | 10; I  | Landim, 2020 [138]    |
| P: Videoconference-based group intervention that provided education and practice with mental health coping strategies<br>C: No intervention                                                          | Other SSC patients              | Intervention: 86<br>Control: 86  | PROMIS Anxiety 4a version 1.0                                                                                                                        | Baseline, 4 weeks                                 | 11; I  | Thombs, 2021 [152]    |
| <b>Bathing and thermal modalities</b>                                                                                                                                                                |                                 |                                  |                                                                                                                                                      |                                                   |        |                       |
| P: Paraffin bath and hand exercises<br>C: N/A: intraindividual assessment                                                                                                                            | N/A; intraindividual assessment | Intervention: 17<br>Control: N/A | Hand function<br>Skin lesions (skin sclerosis)<br>Pain                                                                                               | Baseline, end of intervention at 1 month          | 10; I  | Sandqvist, 2004 [113] |
| P: Hand stretching & hip exercise, ergotherapy, thermal & mud bath, whirlpool therapy, soft tissue massage of the hands and joints<br>C: Same as intervention, but excluding treatment of the hands. | Other SSC patients              | Intervention: 31<br>Control: 22  | HAQ<br>DASH<br>HAI<br>CHFT<br>VAS pain                                                                                                               | Baseline, 3 weeks (end of intervention), 6 months | 10; R  | Horváth, 2017 [126]   |

| Intervention/management strategy                                                                                                                                                                     | Comparator                              | N                                                          | Outcome measures                           | Assessment timepoints                                               | SD&OA* | Reference              |
|------------------------------------------------------------------------------------------------------------------------------------------------------------------------------------------------------|-----------------------------------------|------------------------------------------------------------|--------------------------------------------|---------------------------------------------------------------------|--------|------------------------|
| P: Thermal modalities, tissue mobilisation, and upper extremity exercises with occupational therapist<br>C: N/A: intraindividual assessment                                                          | N/A; intraindividual assessment         | Intervention: 21<br>Control: N/A                           | QuickDASH<br>PROMIS                        | Baseline, 4 weeks, 8 weeks (= end of intervention)                  | 10; R  | Murphy, 2018 [131]     |
| P: Taohong Siwu Decoction (TSD) + oral Prednisone (10mg daily)<br>C: Placebo + oral prednisone                                                                                                       | Other SSc patients                      | Intervention: 71<br>Control: 71                            | Modified Rodnan Skin Score (MRSS)          | Baseline, 2 weeks, 14 weeks.                                        | 11; I  | Zhou, 2018 [153]       |
| P: Paraffin bath and hand exercises<br>C: Hand exercises without wax bath                                                                                                                            | Other SSc patients                      | Intervention: 17<br>Control: 19                            | HAMIS                                      | Baseline, end of intervention (9 weeks), 8-week follow-up           | 11; I  | Gregory, 2019 [132]    |
| P: Paraffin bath and hand exercises<br>C: Water bath, hand exercise                                                                                                                                  | Other SSc patients                      | Intervention: 43<br>Control: 43                            | HAMIS                                      | Baseline, post intervention at 6 month and 12-month follow-up       | 11; I  | Kristensen, 2019 [133] |
| P: Intervention 1 (I1): Hand immersion in Bastian CO <sub>2</sub> bath. Intervention 2 (I2): Hand immersion in hot water<br>C: Hand immersion in Bastian CO <sub>2</sub> bath                        | Other SSc patients and healthy controls | Intervention: 12 in each intervention group<br>Control: 12 | Resistance index (RI)                      | 0, 5, 10 and 20min after hand bath                                  | 11; I  | Lange, 2019 [154]      |
| P: Ozone bath, 2 series of 10 days per series with 10 days apart<br>C: N/A: intraindividual assessment                                                                                               | N/A; intraindividual assessment         | Intervention: 42<br>Control: N/A                           | IL-2sR neopterin                           | Baseline, 40 days (10 days after last treatment)                    | 10; I  | Nowicka, 2019 [155]    |
| <b>Complementary and alternative medicine</b>                                                                                                                                                        |                                         |                                                            |                                            |                                                                     |        |                        |
| P: Active phase of study: Transcutaneous Electrical Nerve Stimulation (TENS)<br>Prolonged study phase: Patients trained to use TENS on a specific acupoints at home<br>C: Active phase of study only | Healthy controls                        | Intervention: 17<br>Control: 9                             | HRV<br>GI symptoms questionnaires<br>SF-36 | Baseline, day 0 (after one session), 2 weeks (after home programme) | 10; W  | Sallam, 2007 [156]     |

| Intervention/management strategy                                                                                       | Comparator                                   | N                                              | Outcome measures                                                                                                   | Assessment timepoints                                                                 | SD&OA* | Reference                 |
|------------------------------------------------------------------------------------------------------------------------|----------------------------------------------|------------------------------------------------|--------------------------------------------------------------------------------------------------------------------|---------------------------------------------------------------------------------------|--------|---------------------------|
| P: Deep oscillation, Biofeedback<br>C: No intervention                                                                 | Other SSc patients                           | Intervention: Do: 10<br>Biof: 8<br>Control: 10 | Scleroderma-VAS for Raynaud's phenomenon                                                                           | Baseline, 4 weeks                                                                     | 11; W  | Sporbeck, 2012 [157]      |
| P: TENS<br>C: N/A: intraindividual assessment                                                                          | N/A; intraindividual assessment              | Intervention: 17<br>Control: N/A               | GMA<br>HRV<br>GI-dysmotility questionnaire<br>mRSS<br>MSS<br>VIP<br>IL-6                                           | Baseline, day 0 (after one session), 2 weeks (after home programme)                   | 10; I  | McNearney, 2013 [158]     |
| P: Biofeedback training<br>C: Biofeedback training                                                                     | Patients with functional faecal incontinence | Intervention: 13<br>Control: 26                | Fecal incontinence severity index (FISI)<br>VAS (quality of life)                                                  | Baseline, 6 weeks (after intervention) and 6 months.                                  | 2; R   | Collins, 2016 [159]       |
| P: Taohong Siwu Decoction (TSD) + oral Prednisone<br>C: Placebo + oral prednisone                                      | Other SSc patients                           | Intervention: 71<br>Control: 71                | Modified Rodnan Skin Score (MRSS)                                                                                  | Baseline, 2 weeks, 14 weeks.                                                          | 11; I  | Zhou, 2018 [153]          |
| P: Received Ciplukan herb (Physalis angulata Linn) 250mg<br>C: Placebo                                                 | Other SSc patients                           | Intervention: 29<br>Control: 30                | MRSS<br>B-cell activating factor (BAFF)<br>Soluble CD40-ligand (sCD40L)<br>procollagen-1 N-terminal peptide (P1NP) | Baseline, 4 weeks, 8 weeks, 12 weeks.                                                 | 11; I  | Dewi, 2019 [160]          |
| P: Tai Chi<br>C: Home exercise                                                                                         | Other SSc patients                           | Intervention: 14<br>Control: 14                | Trunk lateral test<br>Berg balance scale<br>Pittsburgh sleep quality test                                          | Baseline, 10 weeks                                                                    | 11; W  | Cetin, 2020 [136]         |
| P: Holoil (contained Neem oil and Hypericum perforatum)<br>C: Usual care                                               | Other SSc patients                           | Intervention: 21<br>Control: 20                | Infection<br>Debridement<br>Skin ulcer changes                                                                     | Baseline, every two weeks until end of treatment/resolution (up to and above 96 days) | 2; I   | Giuggioli, 2020 [161]     |
| <b>Manual therapy</b>                                                                                                  |                                              |                                                |                                                                                                                    |                                                                                       |        |                           |
| P: Connective tissue massage, Mc Mennell joint manipulation and home exercise<br>C: Home exercise programme alone      | Other SSc patients                           | Intervention: 20<br>Control: 20                | Fist closure<br>Hand Mobility in Scleroderma (HAMIS)<br>Cochin hand functional disability scale (CHFS)<br>SF-36    | Baseline, 9 weeks                                                                     | 11; I  | Bongi, 2009 [116]         |
| P: Tailored rehabilitation program with manual therapy and exercise<br>C: Educational advice and information about SSc | Other SSc patients                           | Intervention: 10<br>Control: 10                | global health<br>hand and face conditions:                                                                         | Baseline, 9 weeks (end of intervention), 18 weeks                                     | 11; W  | Maddali Bongi, 2009 [117] |
| P: Manual lymph drainage (MDL)<br>C: No intervention                                                                   | Other SSc patients                           | Intervention: 20<br>Control: 15                | HAMIS<br>HAQ<br>SF-36                                                                                              | Baseline, 5 weeks (end of treatment), 14 weeks.                                       | 11; R  | Bongi, 2011 [162]         |

| Intervention/management strategy                                                                                                                                                                     | Comparator                      | N                                | Outcome measures                                                                                           | Assessment timepoints                                                                                                                                  | SD&OA* | Reference                    |
|------------------------------------------------------------------------------------------------------------------------------------------------------------------------------------------------------|---------------------------------|----------------------------------|------------------------------------------------------------------------------------------------------------|--------------------------------------------------------------------------------------------------------------------------------------------------------|--------|------------------------------|
| P: Combined connective tissue massage, Kabat's technique, kinesiotherapy and home mimic exercise program<br>C: Home exercise programme alone                                                         | Other SSC patients              | Intervention: 20<br>Control: 20  | Mouth Opening<br>HAQ<br>SF-36                                                                              | Baseline, end of treatment (9 weeks), 9 weeks post treatment follow up                                                                                 | 11; I  | Maddali Bongi, 2011 [119]    |
| P: Daily home programme (warm gloves, Thai massage, stretching)<br>C: Same programme without gloves                                                                                                  | Other SSC patients              | Intervention: 14<br>Control: 14  | HAMIS                                                                                                      | Baseline, 2 weeks                                                                                                                                      | 11; W  | Vannajak, 2014 [163]         |
| P: Osteopathic manipulative treatment<br>C: N/A: intraindividual assessment                                                                                                                          | N/A; intraindividual assessment | Intervention: 6<br>Control: N/A  | Hand stiffness<br>ROM of fingers<br>Distal upper limbs skin score<br>CHFS<br>HAQ-DI<br>VAS (pain)<br>SF-36 | Hand stiffness, ROM of fingers, distal upper limbs skin score, disease symptoms, functional status at baseline, 9 weeks (post intervention), 13 weeks. | 4; I   | O'Connor, 2016 [164]         |
| P: Hand stretching & hip exercise, ergotherapy, thermal & mud bath, whirlpool therapy, soft tissue massage of the hands and joints<br>C: Same as intervention, but excluding treatment of the hands. | Other SSC patients              | Intervention: 31<br>Control: 22  | HAQ<br>DASH<br>HAI<br>CHFT<br>VAS pain                                                                     | Baseline, 3 weeks (end of intervention), 6 months                                                                                                      | 10; R  | Horváth, 2017 [126]          |
| P: Manual therapy and physiotherapy, three weeks every year for three years<br>C: N/A: intraindividual assessment                                                                                    | N/A; intraindividual assessment | Intervention: 43<br>Control: N/A | HAQ DI                                                                                                     | Baseline, once a year for three years                                                                                                                  | 10; R  | Brignoli, 2018 [129]         |
| <b>Dietary therapy and nutrition</b>                                                                                                                                                                 |                                 |                                  |                                                                                                            |                                                                                                                                                        |        |                              |
| P: Probiotics<br>C: N/A: intraindividual assessment                                                                                                                                                  | N/A; intraindividual assessment | Intervention: 10<br>Control: N/A | GIT score<br>reflux<br>bloating/distention                                                                 | Baseline, 2 months                                                                                                                                     | 10; I  | Frech, 2011 [165]            |
| P: Individually adapted nutritional intervention<br>C: N/A: intraindividual assessment                                                                                                               | N/A; intraindividual assessment | Intervention: 9<br>Control: N/A  | Weight<br>Food intake<br>Nutritional biochemical parameters<br>SF-36                                       | Baseline, 4 months, 8 months & 12 months                                                                                                               | 10; I  | Ortiz-Santamaria, 2014 [166] |



| Intervention/management strategy                                                             | Comparator                      | N                                | Outcome measures                                                                                                                                      | Assessment timepoints                                                                                                                                       | SD&OA* | Reference                    |
|----------------------------------------------------------------------------------------------|---------------------------------|----------------------------------|-------------------------------------------------------------------------------------------------------------------------------------------------------|-------------------------------------------------------------------------------------------------------------------------------------------------------------|--------|------------------------------|
| P: Medical nutrition therapy<br>C: N/A: intraindividual assessment                           | N/A; intraindividual assessment | Intervention: 18<br>Control: N/A | Abridged Scored Patient-Generated Subjective Global Assessment (abPGSGA)<br>Body composition<br>Sarcopenic classification by DXA<br>Nutritional score | Baseline, 18 months                                                                                                                                         | 10; I  | Doerfler, 2017 [167]         |
| P: Probiotics<br>C: Placebo                                                                  | Other SSc patients              | Intervention: 19<br>Control: 21  | GIT<br>Reflux score                                                                                                                                   | Baseline, 60 days, 120 days                                                                                                                                 | 11; I  | Low, 2019 [168]              |
| P: Probiotics<br>C: Placebo                                                                  | Other SSc patients              | Intervention: 37<br>Control: 36  | UCLA GIT 2.0<br>Th1, Th2, Th17, Treg cells                                                                                                            | Baseline, 8 weeks                                                                                                                                           | 11; W  | Marighela, 2019 [169]        |
| P: Faecal microbiota transplantation<br>C: Placebo                                           | Other SSc patients              | Intervention: 5<br>Control: 4    | ULCA GIT 2.0                                                                                                                                          | Baseline, week 4, week 16                                                                                                                                   | 11; I  | Fretheim, 2020 [170]         |
| <b>Phototherapy and laser treatment</b>                                                      |                                 |                                  |                                                                                                                                                       |                                                                                                                                                             |        |                              |
| P: Infrared A (IRA)<br>C: N/A: intraindividual assessment                                    | N/A; intraindividual assessment | Intervention: 58<br>Control: N/A | Response to cold-challenge (tau-value)<br>VAS (Raynaud's phenomenon)<br>MRSS<br>DAS28                                                                 | Baseline, after 1, 5 and 10 IRA treatments, 1-week post-intervention, 3 weeks post-intervention and 6 weeks post intervention (11-week time frame in total) | 10; I  | Foerster, 2005 [171]         |
| P: Intense pulsed light (IPL)<br>C: N/A: intraindividual assessment                          | N/A; intraindividual assessment | Intervention: 20<br>Control: N/A | Photographic appearance<br>Laser doppler imaging (LDI)<br>Thermography                                                                                | Baseline, 1, 6 and 12 months after therapy.                                                                                                                 | 10; R  | Murray, 2012 [172]           |
| P: Pulsed dye laser & intense pulsed light (PDL & IPL)<br>C: N/A: intraindividual assessment | N/A; intraindividual assessment | Intervention: 19<br>Control: N/A | LDI<br>Clinical photography<br>Dermoscopy<br>Hospital Anxiety and Depression Scale (HADS)<br>Adapted Satisfaction with Appearance Scale (ASWAP)       | Baseline, week 4, 8, 16 (=8 weeks after final treatment)<br>Nine months.                                                                                    | 10; I  | Dinsdale, 2014 [173]         |
| P: Pulsed dye laser (PDL)<br>C: N/A: intraindividual assessment                              | N/A; intraindividual assessment | Intervention: 23<br>Control: N/A | VAS tolerance<br>VAS satisfaction                                                                                                                     | Effect of treatment at end of treatment (until lesion cleared) and 6 months post-intervention follow-up                                                     | 4; I   | Burillo-Martinez, 2017 [174] |
| P: Intense pulsed light (IPL)<br>C: N/A: intraindividual assessment                          | N/A; intraindividual assessment | Intervention: 15<br>Control: 5   | oral opening<br>inter-ridge distance<br>inter-incisal distance                                                                                        | Baseline, after 3 treatments, after 7 treatments, 3-month follow-up 6-month follow-up                                                                       | 10; I  | Rosholm Comstedt, 2017 [175] |
| P: Low level light therapy (IR + red + blue)<br>C: N/A: intraindividual assessment           | N/A; intraindividual assessment | Intervention: 8<br>Control: N/A  | VAS ulcer assessment<br>LDI<br>Patient opinion on treatment                                                                                           | Baseline, 1 week, 2 weeks, 3 weeks (=end of treatment), 4 weeks, 8 weeks.                                                                                   | 10; R  | Hughes, 2019 [176]           |
| <b>Shockwave therapy</b>                                                                     |                                 |                                  |                                                                                                                                                       |                                                                                                                                                             |        |                              |

| Intervention/management strategy                                                                                   | Comparator                      | N                                | Outcome measures                                                                                                                                                                                                             | Assessment timepoints                                              | SD&OA* | Reference              |
|--------------------------------------------------------------------------------------------------------------------|---------------------------------|----------------------------------|------------------------------------------------------------------------------------------------------------------------------------------------------------------------------------------------------------------------------|--------------------------------------------------------------------|--------|------------------------|
| P: ESWT with pressure pulses<br>C: N/A: intraindividual assessment                                                 | N/A; intraindividual assessment | Intervention: 30<br>Control: N/A | RSS<br>VAS (Skin wellness)<br>Skin thickness<br>Endothelial progenitor cells (EPCs)<br>Circulating endothelial cells (CECs)<br>von Willebrand factor (vWF)<br>Vascular endothelial growth factor (VEGF)<br>sICAM-1<br>sMCP-1 | Baseline, after 1st sitting, 7 days, 30 days, 60 days, 90 days.    | 10; I  | Tinazzi, 2011 [177]    |
| P: ESWT<br>C: N/A: intraindividual assessment                                                                      | N/A; intraindividual assessment | Intervention: 8<br>Control: N/A  | vWF<br>VEGF<br>RSS<br>VAS;                                                                                                                                                                                                   | Baseline, 1 week, 4 weeks                                          | 10; I  | Belloli, 2013 [178]    |
| P: ESWT for digital ulcers in SSc<br>C: Usual care                                                                 | Other SSc patients              | Intervention: 9<br>Control: 14   | Skin sclerosis<br>Skin thickening<br>No. of digital ulcers (DUs)                                                                                                                                                             | Baseline, 4 weeks, 8 weeks                                         | 10; I  | Saito, 2016 [179]      |
| P: ESWT for digital ulcers in SSc<br>C: N/A: intraindividual assessment                                            | N/A; intraindividual assessment | Intervention: 9<br>Control: N/A  | No. of DUs<br>Size of DUs<br>HAQ<br>EQ5D<br>VAS (pain)<br>PainVision readout                                                                                                                                                 | Baseline, 9 weeks, 15 weeks, 20 weeks.                             | 10; I  | Saito, 2016 [180]      |
| <b>Healthcare models</b>                                                                                           |                                 |                                  |                                                                                                                                                                                                                              |                                                                    |        |                        |
| P: Customized intervention for dental hygiene and upper extremity's function<br>C: N/A: intraindividual assessment | N/A; intraindividual assessment | Intervention: 17<br>Control: N/A | Patient hygiene performance index (PHP)<br>Dental measures<br>Button time<br>Pegboard time<br>Keitel functional index (KFI)                                                                                                  | Baseline, 6 months, 12 months                                      | 10; I  | Poole, 2010 [181]      |
| P: Multidisciplinary disease management programme<br>C: N/A: intraindividual assessment                            | N/A; intraindividual assessment | Intervention: 41<br>Control: N/A | ANOVAs for cognition and depression                                                                                                                                                                                          | Baseline, 6 weeks post intervention and 6 months post intervention | 10; R  | Kwakkenbos, 2011 [145] |
| P: Multidisciplinary team care<br>C: Usual care                                                                    | Other SSc patients              | Intervention: 28<br>Control: 25  | Grip strength<br>MMO<br>6MWD<br>HAQ                                                                                                                                                                                          | Baseline, 12 weeks, 24 weeks                                       | 11; I  | Schouffoer, 2011 [182] |
| <b>Hyperbaric oxygen or ozone therapy</b>                                                                          |                                 |                                  |                                                                                                                                                                                                                              |                                                                    |        |                        |
| P: Hyperbaric oxygen therapy<br>C: N/A: intraindividual assessment                                                 | N/A; intraindividual assessment | Intervention: 6<br>Control: N/A  | No. of session to achieve healing<br>Degree of healing<br>No. of amputations                                                                                                                                                 | Until ulcer resolution                                             | 4; I   | Mirasoglu, 2017 [183]  |
| P: Oxygen-ozone therapy<br>C: Usual care                                                                           | Other SSc patients              | Intervention: 25<br>Control: 25  | Grading of DU healing<br>Expression of VEGF<br>Expression of endothelin-1 type A receptor (ETAR)                                                                                                                             | Baseline, 20 days (= end of intervention)                          | 11; W  | Hassanien, 2018 [184]  |

| Intervention/management strategy                                                                                                                                   | Comparator                      | N                                             | Outcome measures                                                                                                            | Assessment timepoints                                                                            | SD&OA* | Reference           |
|--------------------------------------------------------------------------------------------------------------------------------------------------------------------|---------------------------------|-----------------------------------------------|-----------------------------------------------------------------------------------------------------------------------------|--------------------------------------------------------------------------------------------------|--------|---------------------|
| P: Ozone bath, 2 series of 10 days per series with 10 days apart<br>C: N/A: intraindividual assessment                                                             | N/A; intraindividual assessment | Intervention: 42<br>Control: N/A              | IL-2sR neopterin                                                                                                            | Baseline, 40 days (10 days after last treatment)                                                 | 10; I  | Nowicka, 2019 [155] |
| <b>Oral hygiene</b>                                                                                                                                                |                                 |                                               |                                                                                                                             |                                                                                                  |        |                     |
| P: Customized intervention for dental hygiene and upper extremity's function<br>C: N/A: intraindividual assessment                                                 | N/A; intraindividual assessment | Intervention: 17<br>Control: N/A              | Patient hygiene performance index (PHP)<br>Dental measures<br>Button time<br>Pegboard time<br>Keitel functional index (KFI) | Baseline, 6 months, 12 months                                                                    | 10; I  | Poole, 2010 [181]   |
| P: Multi-faceted oral health intervention<br>C: Usual care                                                                                                         | Other SSC patients              | Intervention: 26<br>Control: 22               | Löe-Silness gingival index (GI)                                                                                             | Baseline, 3 months, 6 months                                                                     | 11; W  | Yuen, 2011 [121]    |
| P: Xylitol chewing gum<br>C: Xylitol mouth rinse                                                                                                                   | Other SSC patients              | Intervention: 6<br>Control: 7                 | Changes in levels of Mutans Streptococci (MS)                                                                               | MS changes from baseline, directly after intervention (10 minutes) and 25mins after intervention | 11; I  | Yuen, 2012 [185]    |
| <b>Others</b>                                                                                                                                                      |                                 |                                               |                                                                                                                             |                                                                                                  |        |                     |
| P: Autologous fat transplantation, two times three months apart<br>C: N/A: intraindividual assessment                                                              | N/A; intraindividual assessment | Intervention: 10<br>Control: N/A              | MHSS<br>MMO<br>VAS satisfaction                                                                                             | Baseline and 1 week, 1 month, and 1 year after intervention                                      | 4; I   | Onesti, 2016 [186]  |
| P: Neuromuscular taping<br>C: N/A: intraindividual assessment                                                                                                      | N/A; intraindividual assessment | Intervention: 53<br>Control: N/A              | Functional score to assess hand mobility & functionality                                                                    | Baseline, immediately after treatment, 1 month, 3 months, and 6 months                           | 10; I  | Parisi, 2017 [187]  |
| P: Animal-assisted intervention session with multidisciplinary team, weekly for 20 weeks<br>C:<br>C1: alternative social activity (cooking)<br>C2: No intervention | Other SSC patients              | Intervention: 14<br>Control: C1: 14<br>C2: 14 | VAS<br>STAI-S<br>STAI-T<br>Toronto Alexythymia Scale                                                                        | Baseline and weekly 20 weeks                                                                     | 10; I  | Fiori, 2018 [188]   |

| Intervention/management strategy                                                         | Comparator                      | N                               | Outcome measures                  | Assessment timepoints                   | SD&OA* | Reference         |
|------------------------------------------------------------------------------------------|---------------------------------|---------------------------------|-----------------------------------|-----------------------------------------|--------|-------------------|
| P: Application of amniotic membrane to skin ulcers<br>C: N/A: intraindividual assessment | N/A; intraindividual assessment | Intervention: 6<br>Control: N/A | Duration and outcome of treatment | Until ulcer resolution (up to 21 weeks) | 10; I  | Frech, 2019 [189] |

\*Study design and overall appraisal (adapted from the Joanna Briggs Institute Manual for Evidence Synthesis [190]):

| Notation | Study design                                     |
|----------|--------------------------------------------------|
| 1        | Analytical cross-sectional study                 |
| 2        | Case-control study                               |
| 3        | Case report                                      |
| 4        | Case series                                      |
| 5        | Cohort study                                     |
| 6        | Diagnostic test accuracy study                   |
| 7        | Economic evaluation                              |
| 8        | Prevalence study                                 |
| 9        | Qualitative research                             |
| 10       | Quasi-experimental study                         |
| 11       | Randomised controlled trial                      |
| 12       | Meta-analysis, with or without systematic review |

| Notation | Overall appraisal |
|----------|-------------------|
| R        | Robust            |
| I        | Intermediate      |
| W        | Weak              |

#### Abbreviations:

6MWT: 6 minutes walking test; abPGSSGA: Abridged Scored Patient-Generated Subjective Global Assessment; AC: acupuncture; ADL: activities in daily living; ANA: anti-nuclear antibody; aPL: antiphospholipid; AUC: area under the curve; BASS: Body Area Satisfaction Scale; BDI: Beck Depression Inventory; BF: breathing frequency; BF/CBT: Biofeedback-assisted cognitive-behavioural treatment; BMD: bone mineral density; BMI: body mass index; BP: bodily pain; BPI: Brief Pain Inventory; C: intervention/management strategy for the comparator group C3: complement component 3; C4: complement component 4; CASE: Children's Arthritis Self-Efficacy scale; CAT: complementary and alternative therapies; CC: calcinosis cutis; CCL4: chemokine (C-C motif) ligands 4; CECs: circulating endothelial cells; CES-D: Center for Epidemiological Studies-Depression; CT: cardiovascular training; CI: confidence interval; CLASI: cutaneous lupus erythematosus disease area and severity index; CRP: C-reactive protein; DAS28: Disease Activity Score-28; DASH: Disabilities of the Arm, Shoulder and Hand; DHA: docosahexaenoic acid; dsDNA: double-stranded DNA; DU: digital ulcers; ECLAM: European Consensus Lupus Activity Measurement; EPA: eicosapentaenoic acid; EPCs: endothelial progenitor cells; ER admission: emergency room admission; ES: effect size; ESR: erythrocyte sedimentation rate; ESWT: extracorporeal shock wave therapy; FACIT: Functional Assessment of Chronic Illness Therapy; FISI: Fecal Incontinence Severity Index; FMD: flow-mediated dilation; FSS: Fatigue Severity Scale; GFR: glomerular filtration rate; GH: general health; GHQ: General Health Questionnaire; GI: gingival index; GIT score: gastrointestinal tract score; HADS: Hospital Anxiety and Depression Scale; HAMIS: Hand Mobility in Scleroderma; HAQ: Health Assessment Questionnaire; HAQ-DI: HAQ-Disability Index; HDL: high-density lipoprotein; HeiQ: Health Education Impact Questionnaire; Hg: mercury; HOMA IR: Homeostatic Model Assessment for Insulin Resistance; HR: hazard ratio; HR: heart rate; HRQoL: health-related quality of life; hsCRP: high sensitivity C-reactive protein; IFN: interferon; Ig: immunoglobulin; IID: interincisal distance; IL: interleukin; IPL: intense pulsed light; IQR: interquartile range; IRR: incidence rate ratio; ITT: intention-to-treat; LDl: laser Doppler imaging; LDL: low-density lipoprotein; LE: lupus erythematosus; Lstren: lip strength; MN: minimal needling; MASRI: Medication Adherence Self-Report Inventory; MCID: minimal clinically important difference; METS: metabolic equivalent of task; MH: mental health; MHAQ: Modified Health Assessment Questionnaire; MHISS: Mouth Handicap in Systemic Sclerosis; MI-RSWB: Multidimensional Inventory of Religious/Spiritual Well-Being; MMO: maximal mouth opening; MPO: Myeloperoxidase; MPR: medication possession ratio; mRSS: modified Rodnan Skin Score; MSI: Mental Synthetic

Index: MUFA: monounsaturated fatty acids; MxA: myxovirus protein A; Ns: not significant; OCT: optical coherence tomography; P: intervention/management strategy for the population under investigation; PCS: mental component summary; PDL: pulsed-dye laser; PETCO<sub>2</sub>: end-tidal carbon dioxide pressure; PF: physical functioning; PGA: Physician Global Assessment; PH: physical health; PHP: Patient Hygiene Performance; PROMIS: Patient-Reported Outcomes Measurement Information System; PSI: Physical Synthetic Index; PSQ: Perceived Severity of Stress Questionnaire; PSQI: Pittsburgh Sleep Quality Index; PSS: Perceived Stress Scale; PtGA: Patient Global Assessment; PUFA: polyunsaturated fatty acids; PUVA: psoralen and ultraviolet A; PWC75%/kg: physical working capacity measured at 75% of the predicted maximal heart rate; RCP: respiratory compensation point; RCT: randomised clinical trial; RNP: ribonucleoprotein; ROM: range of motion; RP: role physical; RR: relative risk; RSE: Rosenberg Self-Esteem Scale; RT: resistance training; SDI: SLICC/ACR Damage Index; SE scale: Chronic Disease Self-Efficacy Scale; SEF: second self-efficacy for performing functions; SEOS: Self-Efficacy for controlling Other Symptoms; SEP: Self-Efficacy Perception for controlling pain; SF-36: short-form 36; SF-MPQ: Short-Form McGill Pain Questionnaire; SFA: saturated fatty acids; SFAQ: Scleroderma Functional Assessment Questionnaire; SGRQ: St. George's Respiratory Questionnaire; SIBID: Situational Inventory of Body Image Dysphoria; sICAM: soluble intracellular cellular adhesion molecule; SLAM: Systemic Lupus Activity Measure; SLAQ: Systemic Lupus Activity Questionnaire; SLE: systemic lupus erythematosus; SLEDAI: Systemic Lupus Erythematosus Disease Activity Index; Sm: Smith; SM: Social media; SMILEY: Simple Measure of the Impact of Lupus Erythematosus in Youngsters; SMS: Symptom-monitoring Support; SSC: systemic sclerosis; SSGLSS: Scleroderma Support Group Leader Self-efficacy Scale; Std: standard; sTNFR: soluble tumour necrosis factor receptor; taVNS: Transcutaneous auricular vagus nerve stimulation; TCM: traditional Chinese medicine; TE: expiratory time; TG: triglycerides; TI: inspiratory time; TLR: toll-like receptor; TNF: tumour necrosis factor; TOT: total respiratory time; Tprot: tongue protrusion; Tstren: tongue strength; TUG: Timed Up and Go; UC: usual care; UCLA GIT: University of California Los Angeles Scleroderma Clinical Trials Consortium Gastrointestinal Tract; UVA1: ultraviolet A1; VAS: visual analogue scale; VAT: ventilatory anaerobic threshold; VE/VCO<sub>2</sub>: ventilatory equivalent for carbon dioxide; VLDL: very low-density lipoprotein; VO<sub>2</sub> max: maximal oxygen consumption; VT: tidal volume; VT: vitality; W: week; WHOQOL: World Health Organization Quality of Life Instrument.

#### References:

- Ramsey-Goldman R, Schilling EM, Dunlop D, Langman C, Greenland P, Thomas RJ, et al. A pilot study on the effects of exercise in patients with systemic lupus erythematosus. *Arthritis Care & Research*. 2000 2000; 13(5):262-269.
- Tench CM, McCarthy J, McCurdie I, White PD, D'Cruz DP. Fatigue in systemic lupus erythematosus: a randomized controlled trial of exercise. *Rheumatology*. 2003 2003; 42(9):1050-1054.
- Carvalho MR, Sato EI, Tebexreni AS, Heidecher RT, Schenkman S, Neto TL. Effects of supervised cardiovascular training program on exercise tolerance, aerobic capacity, and quality of life in patients with systemic lupus erythematosus. *Arthritis & Rheumatism*. 2005 2005; 53(6):838-844.
- Clarke-Jenssen AC, Fredriksen PM, Lilleby V, Mengshoel AM. Effects of supervised aerobic exercise in patients with systemic lupus erythematosus: a pilot study. *Arthritis & Rheumatism*. 2005 2005; 53(2):308-312.
- do Prado DM, Gualano B, Miozzi R, Lima FR, Roschel H, Borba E, et al. Erratic control of breathing during exercise in patients with systemic lupus erythematosus: a pilot-study. *Lupus*. 2011 2011; 20(14):1535-1540.
- Otto AD, Mishler AE, Shah N, Krug MM, Phillips A, Wilson N, et al. Feasibility of Implementing a Lifestyle Intervention in Overweight and Obese Patients with Systemic Lupus Erythematosus. *Medicine & Science in Sports & Exercise*. 2011 2011; 43:123-123.
- Yuen HK, Holthaus K, Kamen DL, Sword DO, Breland HL. Using Wii Fit to reduce fatigue among African American women with systemic lupus erythematosus: a pilot study. *Lupus*. 2011 2011; 20(12):1293-1299.
- Miozzi R, Benatti FB, Lucidade de Sa Pinto A, Lima FR, Borba EF, Prado DM, et al. Using exercise training to counterbalance chronotropic incompetence and delayed heart rate recovery in systemic lupus erythematosus: a randomized trial. *Arthritis care & research*. 2012 2012; 64(8):1159-1166.
- da Silva AE, dos Reis-Neto ET, da Silva NP, Sato EI. The effect of acute physical exercise on cytokine levels in patients with systemic lupus erythematosus. *Lupus*. 2013 2013; 22(14):1479-1483.
- dos Reis-Neto ET, da Silva AE, Monteiro CM, de Camargo LM, Sato EI. Supervised physical exercise improves endothelial function in patients with systemic lupus erythematosus. *Rheumatology*. 2013 2013; 52(12):2187-2195.
- Barnes JN, Nualnim N, Dhindsa M, Renzi CP, Tanaka H. Macro- and microvascular function in habitually exercising systemic lupus erythematosus patients. *Scandinavian Journal of Rheumatology*. 2014 2014; 43(3):209-216.
- Perandini LA, Sales-de-Oliveira D, Mello SB, Camara NO, Benatti FB, Lima FR, et al. Exercise training can attenuate the inflammatory milieu in women with systemic lupus erythematosus. *Journal of Applied Physiology*. 2014 2014; 117(6):639-647.
- Benatti FB, Miozzi R, Passarelli M, Nakandakare ER, Perandini L, Lima FR, et al. The effects of exercise on lipid profile in systemic lupus erythematosus and healthy individuals: a randomized trial. *Rheumatology International*. 2015 2015; 35(1):61-69.
- Bogdanovic G, Stojanovich L, Djokovic A, Stanisavljevic N. Physical Activity Program Is Helpful for Improving Quality of Life in Patients with Systemic Lupus Erythematosus. *Tohoku Journal of Experimental Medicine*. 2015 2015; 237(3):193-199.
- Perandini LA, Sales-de-Oliveira D, Mello S, Camara NO, Benatti FB, Lima FR, et al. Inflammatory cytokine kinetics to single bouts of acute moderate and intense aerobic exercise in women with active and inactive systemic lupus erythematosus. *Exercise Immunology Review*. 2015 2015; 21:174-185.
- Abraham MI, Gomiero AB, Peccin MS, Grande AJ, Trevisani VF. Cardiovascular training vs. resistance training for improving quality of life and physical function in patients with systemic lupus erythematosus: a randomized controlled trial. *Scandinavian Journal of Rheumatology*. 2016 2016; 45(3):197-201.
- Avaux M, Hoellinger P, Nieuwland-Husson S, Fraselé V, Depresseux G, Houssiau FA. Effects of two different exercise programs on chronic fatigue in lupus patients. *Acta Clinica Belgica*. 2016 2016; 71(6):403-406.
- Bostrom C, Elfving B, Dupre B, Opava CH, Lundberg IE, Jansson E. Effects of a one-year physical activity programme for women with systemic lupus erythematosus - a randomized controlled study. *Lupus*. 2016 2016; 25(6):602-616.
- Perandini LA, Sales-de-Oliveira D, Almeida DC, Azevedo H, Moreira-Filho CA, Cenedeze MA, et al. Effects of acute aerobic exercise on leukocyte inflammatory gene expression in systemic lupus erythematosus. *Exercise Immunology Review*. 2016 2016; 22:64-81.
- O'Dwyer T, Durcan L, Wilson F. Exercise and physical activity in systemic lupus erythematosus: A systematic review with meta-analyses. *Seminars in Arthritis & Rheumatism*. 2017 2017; 47(2):204-215.
- Wu ML, Yu KH, Tsai JC. The Effectiveness of Exercise in Adults With Systemic Lupus Erythematosus: A Systematic Review and Meta-Analysis to Guide Evidence-Based Practice. *Worldviews on Evidence-Based Nursing*. 2017 2017; 14(4):306-315.
- Benatti FB, Miyake CNH, Dantas WS, Zambelli VO, Shinjo SK, Pereira RMR, et al. Exercise Increases Insulin Sensitivity and Skeletal Muscle AMPK Expression in Systemic Lupus Erythematosus: A Randomized Controlled Trial. *Frontiers in Immunology*. 2018 2018; 9:906.
- Middleton KR, Haaz Moonaz S, Hasni SA, Magana Lopez M, Tataw-Ayuketah G, Farmer N, et al. Yoga for systemic lupus erythematosus (SLE): Clinician experiences and qualitative perspectives from students and yoga instructors living with SLE. *Complementary Therapies in Medicine*. 2018 2018; 41:111-117.

24. Soriano-Maldonado A, Morillas-de-Laguno P, Sabio JM, Gavilan-Carrera B, Rosales-Castillo A, Montalban-Mendez C, et al. Effects of 12-week Aerobic Exercise on Arterial Stiffness, Inflammation, and Cardiorespiratory Fitness in Women with Systemic LUPUS Erythematosus: Non-Randomized Controlled Trial. *Journal of Clinical Medicine*. 2018 2018; 7(12):24.
25. Timoteo RP, Silva AF, Micheli DC, Candido Murta EF, Freire M, Teodoro RB, et al. Increased flexibility, pain reduction and unaltered levels of IL-10 and CD11b + lymphocytes in patients with systemic lupus erythematosus were associated with kinesiotherapy. *Lupus*. 2018 2018; 27(7):1159-1168.
26. da Hora TC, Lima K, Maciel R. The effect of therapies on the quality of life of patients with systemic lupus erythematosus: a meta-analysis of randomized trials. *Advances in Rheumatology*. 2019 2019; 59(1):34.
27. Sheikh SZ, Kaufman K, Gordon BB, Hicks S, Love A, Walker J, et al. Evaluation of the self-directed format of Walk With Ease in patients with systemic lupus erythematosus: the Walk-SLE Pilot Study. *Lupus*. 2019 2019; 28(6):764-770.
28. Wu ML, Tsai JC, Yu KH, Chen JJ. Effects of physical activity counselling in women with systemic lupus erythematosus: A randomized controlled trial. *International Journal of Nursing Practice*. 2019 2019; 25(5):e12770.
29. Gavilan-Carrera B, Vargas-Hitos JA, Morillas-de-Laguno P, Rosales-Castillo A, Sola-Rodriguez S, Callejas-Rubio JL, et al. Effects of 12-week aerobic exercise on patient-reported outcomes in women with systemic lupus erythematosus. *Disability & Rehabilitation*. 2020 2020:1-9.
30. Keramiotou K, Anagnostou C, Kataxaki E, Galanos A, Sfikakis PP, Tektonidou MG. The impact of upper limb exercise on function, daily activities and quality of life in systemic lupus erythematosus: a pilot randomised controlled trial. *RMD Open*. 2020 2020; 6(1):01.
31. Dionello CF, Souza PL, Rosa PV, Santana A, Marchon R, Morel DS, et al. Acute Neuromuscular Responses to Whole-Body Vibration of Systemic Lupus Erythematosus Individuals: A Randomized Pilot Study. *Applied Sciences-Basel*. 2021 2021; 11(1).
32. Kao VP, Wen HJ, Pan YJ, Pai CS, Tsai ST, Su KY. Combined aerobic and resistance training improves physical and executive functions in women with systemic lupus erythematosus. *Lupus*. 2021 2021; 30(6):946-955.
33. Lopes-Souza P, Dionello CF, Bernardes-Oliveira CL, Moreira-Marconi E, Marchon RM, Teixeira-Silva Y, et al. Effects of 12-week whole-body vibration exercise on fatigue, functional ability and quality of life in women with systemic lupus erythematosus: A randomized controlled trial. *Journal of Bodywork and Movement Therapies*. 2021 2021; 27:191-199.
34. Patterson SL, Trupin L, Yazdany J, Dall'Era M, Lanata C, Dequattro K, et al. Physical Inactivity Independently Predicts Incident Depression in a Multi-Racial/Ethnic Systemic Lupus Cohort. *Arthritis care & research*. 2021 2021; 9:09.
35. Sohng KY. Effects of a self-management course for patients with systemic lupus erythematosus. *Journal of Advanced Nursing*. 2003 2003; 42(5):479-486.
36. Brown SJ, Somerset ME, McCabe CS, McHugh NJ. The impact of group education on participants' management of their disease in lupus and scleroderma. *Musculoskeletal Care*. 2004 2004; 2(4):207-217.
37. Harrison MJ, Morris KA, Horton R, Toglia J, Barsky J, Chait S, et al. Results of intervention for lupus patients with self-perceived cognitive difficulties. *Neurology*. 2005 2005; 65(8):1325-1327.
38. Miljeteig K, Graue M. Evaluation of a multidisciplinary patient education program for people with systemic lupus erythematosus. *Journal of Nursing & Healthcare of Chronic Illnesses*. 2009 2009; 1(1):87-95.
39. Drenkard C, Dunlop-Thomas C, Easley K, Bao G, Brady T, Lim SS. Benefits of a self-management program in low-income African-American women with systemic lupus erythematosus: results of a pilot test. *Lupus*. 2012 2012; 21(14):1586-1593.
40. Ganachari MS, Almas SA. Evaluation of clinical pharmacist mediated education and counselling of systemic lupus erythematosus patients in tertiary care hospital. *Indian Journal of Rheumatology*. 2012 2012; 7(1):7-12.
41. Ting TV, Kudalkar D, Nelson S, Cortina S, Pendl J, Budhani S, et al. Usefulness of cellular text messaging for improving adherence among adolescents and young adults with systemic lupus erythematosus. *Journal of Rheumatology*. 2012 2012; 39(1):174-179.
42. Williams EM, Bruner L, Penfield M, Kamen D, Oates JC. Stress and Depression in Relation to Functional Health Behaviors in African American Patients with Systemic Lupus Erythematosus. *Rheumatology (Sunnyvale)*. 2014; 2014(Suppl 4).
43. Zhang X, Tian Y, Li J, Zhao X. Effect of targeted nursing applied to SLE patients. *Experimental & Therapeutic Medicine*. 2016 2016; 11(6):2209-2212.
44. O'Riordan R, Doran M, Connolly D. Fatigue and Activity Management Education for Individuals with Systemic Lupus Erythematosus. *Occupational Therapy International*. 2017 2017; 2017:4530104.
45. Yelnik CM, Richey M, Haiduc V, Everett S, Zhang M, Erkan D. Cardiovascular Disease Prevention Counseling Program for Systemic Lupus Erythematosus Patients. *Arthritis care & research*. 2017 2017; 69(8):1209-1216.
46. Kusnanto K, Sari N, Harmayetty H, Efendi F, Gunawan J. Self-care model application to improve self-care agency, self-care activities, and quality of life in patients with systemic lupus erythematosus. *Journal of Taibah University Medical Sciences*. 2018 2018; 13(5):472-478.
47. Scalzi LV, Hollenbeak CS, Mascuilli E, Olsen N. Improvement of medication adherence in adolescents and young adults with SLE using web-based education with and without a social media intervention, a pilot study. *Pediatric Rheumatology Online Journal*. 2018 2018; 16(1):18.
48. Williams EM, Hyer JM, Viswanathan R, Faith TD, Voronca D, Gebregziabher M, et al. Peer-to-Peer Mentoring for African American Women With Lupus: A Feasibility Pilot. *Arthritis care & research*. 2018 2018; 70(6):908-917.
49. Williams EM, Dismuke CL, Faith TD, Smalls BL, Brown E, Oates JC, et al. Cost-effectiveness of a peer mentoring intervention to improve disease self-management practices and self-efficacy among African American women with systemic lupus erythematosus: analysis of the Peer Approaches to Lupus Self-management (PALS) pilot study. *Lupus*. 2019 2019; 28(8):937-944.
50. Harry O, Crosby LE, Mara C, Ting TV, Huggins JL, Modi AC. Feasibility and acceptability of an innovative adherence intervention for young adults with childhood-onset systemic Lupus Erythematosus. *Pediatric Rheumatology Online Journal*. 2020 2020; 18(1):36.
51. Kankaya H, Karadakovan A. Effects of web-based education and counselling for patients with systemic lupus erythematosus: self-efficacy, fatigue and assessment of care. *Lupus*. 2020 Jul; 29(8):884-891.
52. Khan F, Granville N, Malkani R, Chathampally Y. Health-Related Quality of Life Improvements in Systemic Lupus Erythematosus Derived from a Digital Therapeutic Plus Tele-Health Coaching Intervention: Randomized Controlled Pilot Trial. *J Med Internet Res*. 2020 Oct 20; 22(10):e23868.
53. Allen KD, Beauchamp T, Rini C, Keefe FJ, Bennell KL, Cleveland RJ, et al. Pilot study of an internet-based pain coping skills training program for patients with systemic Lupus Erythematosus. *BMC Rheumatol*. 2021 Jun 17; 5(1):20.
54. White AA, Ba A, Faith TD, Ramakrishnan V, Dismuke-Greer CL, Oates JC, et al. The Care-coordination Approach to Learning Lupus Self-Management: a patient navigator intervention for systemic lupus inpatients. *Lupus Science & Medicine*. 2021 2021; 8(1).
55. Dobkin PL, Da Costa D, Joseph L, Fortin PR, Edworthy S, Barr S, et al. Counterbalancing patient demands with evidence: results from a pan-Canadian randomized clinical trial of brief supportive-expressive group psychotherapy for women with systemic lupus erythematosus. *Annals of Behavioral Medicine*. 2002 2002; 24(2):88-99.
56. Edworthy SM, Dobkin PL, Clarke AE, Da Costa D, Dritsa M, Fortin PR, et al. Group psychotherapy reduces illness intrusiveness in systemic lupus erythematosus. *Journal of Rheumatology*. 2003 2003; 30(5):1011-1016.
57. Greco CM, Rudy TE, Manzi S. Effects of a stress-reduction program on psychological function, pain, and physical function of systemic lupus erythematosus patients: a randomized controlled trial. *Arthritis & Rheumatism*. 2004 2004; 51(4):625-634.



58. Karlson EW, Liang MH, Eaton H, Huang J, Fitzgerald L, Rogers MP, et al. A randomized clinical trial of a psychoeducational intervention to improve outcomes in systemic lupus erythematosus. *Arthritis & Rheumatism*. 2004 2004; 50(6):1832-1841.
59. Goodman D, Morrissey S, Graham D, Bossingham D. The application of cognitive-behaviour therapy in altering illness representations of systemic lupus erythematosus. *Behaviour Change*. 2005 2005; 22(3):156-171.
60. Haupt M, Millen S, Janner M, Falagan D, Fischer-Betz R, Schneider M. Improvement of coping abilities in patients with systemic lupus erythematosus: a prospective study. *Annals of the Rheumatic Diseases*. 2005 2005; 64(11):1618-1623.
61. Ng P, Chan W. Group psychosocial program for enhancing psychological well-being of people with systemic lupus erythematosus. *Journal of Social Work in Disability & Rehabilitation*. 2007 2007; 6(3):75-87.
62. Navarrete-Navarrete N, Peralta-Ramirez MI, Sabio-Sanchez JM, Coin MA, Robles-Ortega H, Hidalgo-Tenorio C, et al. Efficacy of cognitive behavioural therapy for the treatment of chronic stress in patients with lupus erythematosus: a randomized controlled trial. *Psychotherapy & Psychosomatics*. 2010 2010; 79(2):107-115.
63. Navarrete-Navarrete N, Peralta-Ramirez MI, Sabio JM, Martinez-Egea I, Santos-Ruiz A, Jimenez-Alonso J. Quality-of-life predictor factors in patients with SLE and their modification after cognitive behavioural therapy. *Lupus*. 2010 2010; 19(14):1632-1639.
64. Brown RT, Shaftman SR, Tilley BC, Anthony KK, Kral MC, Maxson B, et al. The health education for lupus study: a randomized controlled cognitive-behavioral intervention targeting psychosocial adjustment and quality of life in adolescent females with systemic lupus erythematosus. *American Journal of the Medical Sciences*. 2012 2012; 344(4):274-282.
65. Zhang J, Wei W, Wang CM. Effects of psychological interventions for patients with systemic lupus erythematosus: a systematic review and meta-analysis. *Lupus*. 2012 2012; 21(10):1077-1087.
66. Jolly M, Peters KF, Mikolaitis R, Evans-Raoul K, Block JA. Body image intervention to improve health outcomes in lupus: a pilot study. *JCR: Journal of Clinical Rheumatology*. 2014 2014; 20(8):403-410.
67. Liang H, Tian X, Cao LY, Chen YY, Wang CM. Effect of psychological intervention on health-related quality of life in people with systemic lupus erythematosus: A systematic review. *International Journal of Nursing Sciences*. 2014 2014; 1(3):298-305.
68. Williams EM, Penfield M, Kamen D, Oates JC. An Intervention to Reduce Psychosocial and Biological Indicators of Stress in African American Lupus Patients: The Balancing Lupus Experiences with Stress Strategies Study. *Open J Prev Med*. 2014 Jan; 4(1):22-31.
69. Horesh D, Glick I, Taub R, Agmon-Levin N, Shoenfeld Y. Mindfulness-based group therapy for systemic lupus erythematosus: A first exploration of a promising mind-body intervention. *Complementary Therapies in Clinical Practice*. 2017 2017; 26:73-75.
70. Solati K, Mousavi M, Kheiri S, Hasanpour-Dehkordi A. The Effectiveness of Mindfulness-based Cognitive Therapy on Psychological Symptoms and Quality of Life in Systemic Lupus Erythematosus Patients: A Randomized Controlled Trial. *Oman Medical Journal*. 2017 2017; 32(5):378-385.
71. Conceição CTM, Meinão IM, Bombana JA, Sato EI. Psychoanalytic psychotherapy improves quality of life, depression, anxiety and coping in patients with systemic lupus erythematosus: a controlled randomized clinical trial. *Adv Rheumatol*. 2019 Jan 22; 59(1):4.
72. Kim HA, Seo L, Jung JY, Kim YW, Lee E, Cho SM, et al. Mindfulness-based cognitive therapy in Korean patients with systemic lupus erythematosus: A pilot study. *Complementary Therapies in Clinical Practice*. 2019 2019; 35:18-21.
73. Sahebari M, Asghari Ebrahimabad MJ, Ahmadi Shoraketokanlo A, Aghamohammadian Sharbaf H, Khodashahi M. Efficacy of Acceptance and Commitment Therapy in Reducing Disappointment, Psychological Distress, and Psychasthenia among Systemic Lupus Erythematosus (SLE) Patients. *Iranian Journal of Psychiatry*. 2019 2019; 14(2):130-136.
74. Xu HY, Teng Q, Zeng Y, Tian CP, Yang BW, Yao XL. Psychoeducational Intervention Benefits the Quality of Life of Patients with Active Systemic Lupus Erythematosus. *Journal of Nanomaterials*. 2021 2021; 2021.
75. Shah M, Kavanaugh A, Coyle Y, Adams-Huet B, Lipsky PE. Effect of a culturally sensitive cholesterol lowering diet program on lipid and lipoproteins, body weight, nutrient intakes, and quality of life in patients with systemic lupus erythematosus. *Journal of Rheumatology*. 2002 2002; 29(10):2122-2128.
76. Minami Y, Sasaki T, Arai Y, Kurisu Y, Hisamichi S. Diet and systemic lupus erythematosus: a 4 year prospective study of Japanese patients. *Journal of Rheumatology*. 2003 2003; 30(4):747-754.
77. Duffy EM, Meenagh GK, McMillan SA, Strain JJ, Hannigan BM, Bell AL. The clinical effect of dietary supplementation with omega-3 fish oils and/or copper in systemic lupus erythematosus. *Journal of Rheumatology*. 2004 2004; 31(8):1551-1556.
78. Shah M, Adams-Huet B, Kavanaugh A, Coyle Y, Lipsky P. Nutrient intake and diet quality in patients with systemic lupus erythematosus on a culturally sensitive cholesterol lowering dietary program. *Journal of Rheumatology*. 2004 2004; 31(1):71-75.
79. Aghdassi E, Morrison S, Landolt-Marticoarena C, Su J, Pineau CA, Gladman D, et al. The use of micronutrient supplements is not associated with better quality of life and disease activity in Canadian patients with systemic lupus erythematosus. *J Rheumatol*. 2010 Jan; 37(1):87-90.
80. Minami Y, Hirabayashi Y, Nagata C, Ishii T, Harigae H, Sasaki T. Intakes of vitamin B6 and dietary fiber and clinical course of systemic lupus erythematosus: a prospective study of Japanese female patients. *Journal of Epidemiology*. 2011 2011; 21(4):246-254.
81. Davies RJ, Lomer MC, Yeo SI, Avloniti K, Sangle SR, D'Cruz DP. Weight loss and improvements in fatigue in systemic lupus erythematosus: a controlled trial of a low glycaemic index diet versus a calorie restricted diet in patients treated with corticosteroids. *Lupus*. 2012 2012; 21(6):649-655.
82. Elkan AC, Anania C, Gustafsson T, Jogestrand T, Hafstrom I, Frostegard J. Diet and fatty acid pattern among patients with SLE: associations with disease activity, blood lipids and atherosclerosis. *Lupus*. 2012 2012; 21(13):1405-1411.
83. Khajehdehi P, Zanjanejad B, Aflaki E, Nazarinia M, Azad F, Malekmakan L, et al. Oral supplementation of turmeric decreases proteinuria, hematuria, and systolic blood pressure in patients suffering from relapsing or refractory lupus nephritis: a randomized and placebo-controlled study. *Journal of Renal Nutrition*. 2012 2012; 22(1):50-57.
84. Everett ST, Wolf R, Contento I, Haiduc V, Richey M, Erkan D. Short-term patient-centered nutrition counseling impacts weight and nutrient intake in patients with systemic lupus erythematosus. *Lupus*. 2015 2015; 24(12):1321-1326.
85. Shamekhi Z, Amani R, Habibagahi Z, Namjooyan F, Ghadiri A, Saki Malehi A. A Randomized, Double-blind, Placebo-controlled Clinical Trial Examining the Effects of Green Tea Extract on Systemic Lupus Erythematosus Disease Activity and Quality of Life. *Phytotherapy Research*. 2017 2017; 31(7):1063-1071.
86. Rothman D, Khan F, Rudin V. Individualized Diet and Lifestyle Modifications Reverse Symptoms of Systemic Lupus Erythematosus. *Journal of Medical Internet Research*. 2018 2018; 20(9):21-21.
87. Pocovi-Gerardino G, Correa-Rodriguez M, Callejas-Rubio JL, Rios-Fernandez R, Martin-Amada M, Cruz-Caparrros MG, et al. Beneficial effect of Mediterranean diet on disease activity and cardiovascular risk in systemic lupus erythematosus patients: a cross-sectional study. *Rheumatology*. 2021 2021; 60(1):160-169.
88. Wen CP, Fan YS, Wang XC, Li XY, Lu KD. Effect of detoxification, removing stasis and nourishing yin method on corticosteroid-induced hyperlipidemia in patients with systemic lupus erythematosus. *Chinese Journal of Integrative Medicine*. 2007 2007; 13(3):180-184.
89. Greco CM, Kao AH, Maksimowicz-McKinnon K, Glick RM, Houze M, Sereika SM, et al. Acupuncture for systemic lupus erythematosus: a pilot RCT feasibility and safety study. *Lupus*. 2008 2008; 17(12):1108-1116.
90. Alvarez-Nemegyei J, Bautista-Botello A, Davila-Velazquez J. Association of complementary or alternative medicine use with quality of life, functional status or cumulated damage in chronic rheumatic diseases. *Clinical Rheumatology*. 2009 2009; 28(5):547-551.

91. Liao YN, Liu CS, Tsai TR, Hung YC, Chang SJ, Lin HL, et al. Preliminary study of a traditional Chinese medicine formula in systemic lupus erythematosus patients to taper steroid dose and prevent disease flare-up. *Kaohsiung Journal of Medical Sciences*. 2011 2011; 27(7):251-257.
92. Linda LDZ, Zhao Xiang B, Jun Hua G, Xin Z, Yu T, Jian Chun M, et al. Chinese Herbal Medicine (Zi Shen Qing) for Mild-to-Moderate Systemic Lupus Erythematosus: A Pilot Prospective, Single-Blinded, Randomized Controlled Study. *Evidence-based Complementary & Alternative Medicine (eCAM)*. 2013 2013; 2013:1-10.
93. Stege H, Budde MA, Grether-Beck S, Krutmann J. Evaluation of the capacity of sunscreens to photoprotect lupus erythematosus patients by employing the photoprovocation test. *Photodermatology, Photoimmunology & Photomedicine*. 2000 2000; 16(6):256-259.
94. Herzinger T, Plewig G, Rocken M. Use of sunscreens to protect against ultraviolet-induced lupus erythematosus. *Arthritis & Rheumatism*. 2004 2004; 50(9):3045-3046.
95. Szegedi A, Simics E, Aleksza M, Horkay I, Gaal K, Sipka S, et al. Ultraviolet-A1 phototherapy modulates Th1/Th2 and Tc1/Tc2 balance in patients with systemic lupus erythematosus. *Rheumatology*. 2005 2005; 44(7):925-931.
96. Zahn S, Graef M, Patsinakidis N, Landmann A, Surber C, Wenzel J, et al. Ultraviolet light protection by a sunscreen prevents interferon-driven skin inflammation in cutaneous lupus erythematosus. *Experimental Dermatology*. 2014 2014; 23(7):516-518.
97. Abdul Kadir WD, Jamil A, Shaharir SS, Md Nor N, Abdul Gafor AH. Photoprotection awareness and practices among patients with systemic lupus erythematosus and its association with disease activity and severity. *Lupus*. 2018 2018; 27(8):1287-1295.
98. Ward MM, Sundaramurthy S, Lotstein D, Bush TM, Neuwelt CM, Street RL, Jr. Participatory patient-physician communication and morbidity in patients with systemic lupus erythematosus. *Arthritis Rheum*. 2003 Dec 15; 49(6):810-818.
99. Sahebalzamani M, Farahani H, Jamarani MT, Faezi ST, Moradi K, Paragomi P. Effects of a Continuous Care Model on Patients' Knowledge and Health-Related Quality of Life in Systemic Lupus Erythematosus. *Rehabilitation Nursing Journal*. 2017 2017; 42(6):E9-E18.
100. Xie X, Song Y, Yang H, Nie A, Chen H, Li JP. Effects of transitional care on self-care, readmission rates, and quality of life in adult patients with systemic lupus erythematosus: a randomized controlled trial. *Arthritis Research & Therapy*. 2018 2018; 20(1):184.
101. Zhang L, Geng S, Qian L, Ye S, Wang X, Lu G, et al. Multidisciplinary care in patients with systemic lupus erythematosus: a randomized controlled trial in China. *Int J Clin Pharm*. 2019 Oct; 41(5):1247-1255.
102. Erceg A, Bovenschen HJ, van de Kerkhof PC, de Jong EM, Seyger MM. Efficacy and safety of pulsed dye laser treatment for cutaneous discoid lupus erythematosus. *Journal of the American Academy of Dermatology*. 2009 2009; 60(4):626-632.
103. Rerknimitr P, Tekacharin N, Panchaprateep R, Witsuwannakul J, Tangtanatakul P, Hirankarn N, et al. Pulsed-dye laser as an adjuvant treatment for discoid lupus erythematosus: a randomized, controlled trial. *Journal of Dermatological Treatment*. 2019 2019; 30(1):81-86.
104. Dorsey RR, Andresen EM, Moore TL. Health-related quality of life and support group attendance for patients with systemic lupus erythematosus. *JCR: Journal of Clinical Rheumatology*. 2004 2004; 10(1):6-9.
105. Li X, He L, Wang J, Wang M. Illness uncertainty, social support, and coping mode in hospitalized patients with systemic lupus erythematosus in a hospital in Shaanxi, China. *PLoS ONE [Electronic Resource]*. 2019 2019; 14(2):e0211313.
106. Bantornwan S, Watanapa WB, Hussarin P, Chatsirichaoenkul S, Larpparisuth N, Teerapornlertratt T, et al. Role of meditation in reducing sympathetic hyperactivity and improving quality of life in lupus nephritis patients with chronic kidney disease. *Journal of the Medical Association of Thailand*. 2014 2014; 97:S101-107.
107. Squance ML, Reeves G, Attia J, Bridgman H, Guest M. Self-reported Lupus flare: Association with everyday home and personal product exposure. *Toxicology Reports*. 2015 2015; 2:880-888.
108. Xu D, You X, Wang Z, Zeng Q, Xu J, Jiang L, et al. Chinese Systemic Lupus Erythematosus Treatment and Research Group Registry VI: Effect of Cigarette Smoking on the Clinical Phenotype of Chinese Patients with Systemic Lupus Erythematosus. *PLoS ONE [Electronic Resource]*. 2015 2015; 10(8):e0134451.
109. Abdelaziz SH, Elmetwaly OIA, Maged LA. Effect of using warm shower and warm water footbath with and without adding epsom salt on fatigue level in systemic lupus patients. *Indian Journal of Public Health Research and Development*. 2020 2020; 11(5):854-859.
110. Oliveira FAP, Santos F, Dias A, Neiva CLS, Telles RW, Lanna CCD. Cosmetic camouflage improves health-related quality of life in women with systemic lupus erythematosus and permanent skin damage: A controlled intervention study. *Lupus*. 2020 2020; 29(11):1438-1448.
111. Aranow C, Atish-Fregoso Y, Lesser M, Mackay M, Anderson E, Chavan S, et al. Transcutaneous auricular vagus nerve stimulation reduces pain and fatigue in patients with systemic lupus erythematosus: a randomised, double-blind, sham-controlled pilot trial. *Annals of the Rheumatic Diseases*. 2021 2021; 80(2):203-208.
112. Pizzo G, Scardina GA, Messina P. Effects of a nonsurgical exercise program on the decreased mouth opening in patients with systemic scleroderma. *Clinical Oral Investigations*. 2003 2003; 7(3):175-178.
113. Sandqvist G, Akesson A, Eklund M. Evaluation of paraffin bath treatment in patients with systemic sclerosis. *Disability & Rehabilitation*. 2004 2004; 26(16):981-987.
114. Mugii N, Hasegawa M, Matsushita T, Kondo M, Orito H, Yanaba K, et al. The efficacy of self-administered stretching for finger joint motion in Japanese patients with systemic sclerosis. *Journal of Rheumatology*. 2006 2006; 33(8):1586-1592.
115. Antonioli CM, Bua G, Frige A, Prandini K, Radici S, Scarsi M, et al. An individualized rehabilitation program in patients with systemic sclerosis may improve quality of life and hand mobility. *Clinical Rheumatology*. 2009 2009; 28(2):159-165.
116. Bongli SM, Del Rosso A, Galluccio F, Sigismondi F, Miniati I, Conforti ML, et al. Efficacy of connective tissue massage and Mc Mennell joint manipulation in the rehabilitative treatment of the hands in systemic sclerosis. *Clinical Rheumatology*. 2009 2009; 28(10):1167-1173.
117. Maddali Bongli S, Del Rosso A, Galluccio F, Tai G, Sigismondi F, Passalacqua M, et al. Efficacy of a tailored rehabilitation program for systemic sclerosis. *Clin Exp Rheumatol*. 2009 May-Jun; 27(3 Suppl 54):44-50.
118. Oliveira NC, dos Santos Sabbag LM, de Sá Pinto AL, Borges CL, Lima FR. Aerobic exercise is safe and effective in systemic sclerosis. *Int J Sports Med*. 2009 Oct; 30(10):728-732.
119. Maddali-Bongli S, Landi G, Galluccio F, Del Rosso A, Miniati I, Conforti ML, et al. The rehabilitation of facial involvement in systemic sclerosis: efficacy of the combination of connective tissue massage, Kabat's technique and kinesiotherapy: a randomized controlled trial. *Rheumatology International*. 2011 2011; 31(7):895-901.
120. Pinto AL, Oliveira NC, Gualano B, Christmann RB, Painelli VS, Artioli GG, et al. Efficacy and safety of concurrent training in systemic sclerosis. *Journal of Strength & Conditioning Research*. 2011 2011; 25(5):1423-1428.
121. Yuen HK, Weng Y, Bandyopadhyay D, Reed SG, Leite RS, Silver RM. Effect of a multi-faceted intervention on gingival health among adults with systemic sclerosis. *Clinical & Experimental Rheumatology*. 2011 2011; 29(2):S26-32.
122. Yuen HK, Marlow NM, Reed SG, Mahoney S, Summerlin LM, Leite R, et al. Effect of orofacial exercises on oral aperture in adults with systemic sclerosis. *Disability & Rehabilitation*. 2012 2012; 34(1):84-89.
123. Piga M, Tradori I, Pani D, Barabino G, Dessi A, Raffo L, et al. Telemedicine applied to kinesiotherapy for hand dysfunction in patients with systemic sclerosis and rheumatoid arthritis: recovery of movement and telemonitoring technology. *Journal of Rheumatology*. 2014 2014; 41(7):1324-1333.
124. Lima TR, Guimaraes FS, Carvalho MN, Sousa TL, Menezes SL, Lopes AJ. Lower limb muscle strength is associated with functional performance and quality of life in patients with systemic sclerosis. *Brazilian Journal of Physical Therapy*. 2015 2015; 19(2):129-136.



125. Stefanantoni K, Sciarra I, Iannace N, Vasile M, Caucci M, Sili Scavalli A, et al. Occupational therapy integrated with a self-administered stretching program on systemic sclerosis patients with hand involvement. *Clin Exp Rheumatol*. 2016 Sep-Oct; 34 Suppl 100(5):157-161.
126. Horváth J, Bálint Z, Szép E, Deisinger A, Minier T, Farkas N, et al. Efficacy of intensive hand physical therapy in patients with systemic sclerosis. *Clin Exp Rheumatol*. 2017 Sep-Oct; 35 Suppl 106(4):159-166.
127. Rannou F, Boutron I, Mouthon L, Sanchez K, Tiffreau V, Hachulla E, et al. Personalized Physical Therapy Versus Usual Care for Patients With Systemic Sclerosis: A Randomized Controlled Trial. *Arthritis care & research*. 2017 2017; 69(7):1050-1059.
128. Azar M, Rice DB, Kwakkenbos L, Carrier ME, Shrier I, Bartlett SJ, et al. Exercise habits and factors associated with exercise in systemic sclerosis: a Scleroderma Patient-centered Intervention Network (SPIN) cohort study. *Disability & Rehabilitation*. 2018 2018; 40(17):1997-2003.
129. Brignoli E, Frassanito P, Vercesi E, Ferretti C, Felicetti G, Maestri R, et al. Rehabilitation in systemic sclerosis: proposed personalised rehabilitation programme. *G Ital Med Lav Ergon*. 2018 Dec; 40(4):248-256.
130. Mitropoulos A, Gumber A, Crank H, Akil M, Klonizakis M. The effects of upper and lower limb exercise on the microvascular reactivity in limited cutaneous systemic sclerosis patients. *Arthritis Res Ther*. 2018 Jun 5; 20(1):112.
131. Murphy SL, Barber MW, Homer K, Dodge C, Cutter GR, Khanna D. Occupational Therapy Treatment to Improve Upper Extremity Function in Individuals with Early Systemic Sclerosis: A Pilot Study. *Arthritis care & research*. 2018 2018; 70(11):1653-1660.
132. Gregory WJ, Wilkinson J, Herrick AL. A randomised controlled trial of wax baths as an additive therapy to hand exercises in patients with systemic sclerosis. *Physiotherapy*. 2019 2019; 105(3):370-377.
133. Kristensen LQ, Oestergaard LG, Bovbjerg K, Rolving N, Søndergaard K. Use of paraffin instead of lukewarm water prior to hand exercises had no additional effect on hand mobility in patients with systemic sclerosis: A randomized clinical trial. *Hand Therapy*. 2019 2019; 24(1):13-21.
134. Landim SF, Bertolo MB, Marcatto de Abreu MF, Del Rio AP, Mazon CC, Marques-Neto JF, et al. The evaluation of a home-based program for hands in patients with systemic sclerosis. *Journal of Hand Therapy*. 2019 2019; 32(3):313-321.
135. Mitropoulos A, Gumber A, Akil M, Klonizakis M. Exploring the microcirculatory effects of an exercise programme including aerobic and resistance training in people with limited cutaneous systemic sclerosis. *Microvasc Res*. 2019 Sep; 125:103887.
136. Cetin SY, Calik BB, Ayan A. Investigation of the effectiveness of Tai Chi exercise program in patients with scleroderma: A randomized controlled study. *Complementary Therapies in Clinical Practice*. 2020 2020; 40:101181.
137. Filippetti M, Cazzoletti L, Zamboni F, Ferrari P, Caimmi C, Smania N, et al. Effect of a tailored home-based exercise program in patients with systemic sclerosis: A randomized controlled trial. *Scandinavian Journal of Medicine & Science in Sports*. 2020 2020; 30(9):1675-1684.
138. S FL, M BB, Del Rio AP, Sachetto Z, Zonzini Gaino J, J LP, et al. Sustained efficacy of a concise self-management programme for hands in systemic sclerosis: a longitudinal case-control observational study. *Rheumatology*. 2020 2020; 59(11):3330-3339.
139. Cüzdan N, Türk İ, Çiftçi V, Arslan D, Doğan MC, Ünal İ. The effect of a home-based orofacial exercise program on oral aperture of patients with systemic sclerosis: A single-blind prospective randomized controlled trial. *Archives of Rheumatology*. 2021 2021; 36(2):176-184.
140. Defi IR, Gultom C, Chorman MJ, Jennie J. High-intensity interval training can improve hand grip strength, inspiratory muscle, and quality of life in systemic sclerosis subjects. *Reumatologia*. 2021 2021; 59(2):98-103.
141. Gokcen N, Badak SO, Sarpel T, Sertdemir Y, Erken E. The Efficacy of a Home-Based, Self-Administered Hand Exercise Program for Patients With Systemic Sclerosis: A Randomized Controlled, Evaluator-Blind, Clinical Trial. *JCR: Journal of Clinical Rheumatology*. 2021 2021; 6:06.
142. Maddali Bongi S, Passalacqua M, Landi G, Mikhaylova S, Tofani L, Del Rosso A, et al. Rehabilitation of the face and temporomandibular joint in systemic sclerosis. *Therapeutic Advances in Musculoskeletal Disease*. 2021 2021; 13.
143. Murphy SL, Barber M, Huang S, Sabbagh M, Cutter G, Khanna D. Intensive and App-Delivered Occupational Therapy to Improve Upper Extremity Function in Early Diffuse Cutaneous Systemic Sclerosis: A Pilot Two-Arm Trial. *Rheumatology*. 2021 2021; 11:11.
144. Samuelson UK, Ahlmen EM. Development and evaluation of a patient education program for persons with systemic sclerosis (scleroderma). *Arthritis Care & Research*. 2000 2000; 13(3):141-148.
145. Kwakkenbos L, Blysses SJ, Vonk MC, van Helmond AF, van den Ende CH, van den Hoogen FH, et al. Addressing patient health care demands in systemic sclerosis: pre-post assessment of a psycho-educational group programme. *Clin Exp Rheumatol*. 2011 Mar-Apr; 29(2 Suppl 65):S60-65.
146. Poole JL, Skipper B, Mendelson C. Evaluation of a mail-delivered, print-format, self-management program for persons with systemic sclerosis. *Clinical Rheumatology*. 2013 2013; 32(9):1393-1398.
147. Poole JL, Mendelson C, Skipper B, Khanna D. Taking charge of systemic sclerosis: a pilot study to assess the effectiveness of an internet self-management program. *Arthritis care & research*. 2014 2014; 66(5):778-782.
148. Zanatta E, Rodeghiero F, Pigatto E, Galozzi P, Polito P, Favaro M, et al. Long-term improvement in activities of daily living in women with systemic sclerosis attending occupational therapy. *British Journal of Occupational Therapy*. 2017 2017; 80(7):417-422.
149. Khanna D, Serrano J, Berrocal VJ, Silver RM, Cuencas P, Newbill SL, et al. Randomized Controlled Trial to Evaluate an Internet-Based Self-Management Program in Systemic Sclerosis. *Arthritis care & research*. 2019 2019; 71(3):435-447.
150. Thombs BD, Dyas L, Pepin M, Aguila K, Carrier ME, Tao L, et al. Scleroderma Patient-centered Intervention Network-Scleroderma Support group Leader Education (SPIN-SSLED) program: non-randomised feasibility trial. *BMJ Open*. 2019 2019; 9(11):e029935.
151. Uras C, Mastroeni S, Tabolli S, Masini C, Pallotta S, Teofoli P, et al. A comparison between two educational methods in the rehabilitation of the microstomia in systemic sclerosis: a randomized controlled trial. *Clinical Rehabilitation*. 2019 2019; 33(11):1747-1756.
152. Thombs BD, Kwakkenbos L, Levis B, Bourgeault A, Henry RS, Levis AW, et al. Effects of a multi-faceted education and support programme on anxiety symptoms among people with systemic sclerosis and anxiety during COVID-19 (SPIN-CHAT): a two-arm parallel, partially nested, randomised, controlled trial. *Lancet Rheumatol*. 2021 Jun; 3(6):e427-e437.
153. Zhou J, Yang D, Zhou SH, Wang JP, Liu YS, Wang SL. Clinical Efficacy and Safety of Bathing with Chinese Medicine Taohong Siwu Decoction ( ) for Treatment of Diffuse Cutaneous Systemic Sclerosis: A Randomized Placebo-Controlled Trial. *Chinese Journal of Integrative Medicine*. 2018 2018; 24(3):185-192.
154. Lange U, Bogensperger S, Tärner IH, Müller-Ladner U. The effects of a single carbon dioxide and hot water hand bath on acral perfusion in systemic sclerosis: A randomized, clinical study. *Journal of Scleroderma and Related Disorders*. 2019 2019; 4(2):160-162.
155. Nowicka D. Positive effect of ozonotherapy on serum concentration of soluble interleukin-2 receptor and neopterin in patients with systemic sclerosis. *Postepy Dermatol Alergol*. 2019 Apr; 36(2):158-163.
156. Sallam H, McNearney TA, Doshi D, Chen JD. Transcutaneous electrical nerve stimulation (TENS) improves upper GI symptoms and balances the sympathovagal activity in scleroderma patients. *Dig Dis Sci*. 2007 May; 52(5):1329-1337.
157. Sporbeck B, Mathiske-Schmidt K, Jahr S, Huscher D, Becker M, Riemekasten G, et al. Effect of biofeedback and deep oscillation on Raynaud's phenomenon secondary to systemic sclerosis: results of a controlled prospective randomized clinical trial. *Rheumatology International*. 2012 2012; 32(5):1469-1473.
158. McNearney TA, Sallam HS, Hunnicutt SE, Doshi D, Chen JD. Prolonged treatment with transcutaneous electrical nerve stimulation (TENS) modulates neuro-gastric motility and plasma levels of vasoactive intestinal peptide (VIP), motilin and interleukin-6 (IL-6) in systemic sclerosis. *Clin Exp Rheumatol*. 2013 Mar-Apr; 31(2 Suppl 76):140-150.

159. Collins J, Mazor Y, Jones M, Kellow J, Malcolm A. Efficacy of anorectal biofeedback in scleroderma patients with fecal incontinence: a case-control study. *Scandinavian Journal of Gastroenterology*. 2016 2016; 51(12):1433-1438.
160. Dewi S, Isbagio H, Purwaningsih EH, Kertia N, Setiabydy R, Setiati S. A Double-blind, Randomized Controlled Trial of Ciplukan (*Physalis angulata* Linn) Extract on Skin Fibrosis, Inflammatory, Immunology, and Fibrosis Biomarkers in Scleroderma Patients. *Acta Medica Indonesiana*. 2019 2019; 51(4):303-310.
161. Giuggioli D, Lumetti F, Spinella A, Cocchiara E, Sighinolfi G, Citriniti G, et al. Use of Neem oil and *Hypericum perforatum* for treatment of calcinosis-related skin ulcers in systemic sclerosis. *Journal of International Medical Research*. 2020 2020; 48(4):300060519882176.
162. Bongio SM, Del Rosso A, Passalacqua M, Miccio S, Cerinic MM. Manual lymph drainage improving upper extremity edema and hand function in patients with systemic sclerosis in edematous phase. *Arthritis care & research*. 2011 2011; 63(8):1134-1141.
163. Vannajak K, Boonprakob Y, Eungpinichpong W, Ungpansattawong S, Nanagara R. The short-term effect of gloving in combination with Traditional Thai Massage, heat, and stretching exercise to improve hand mobility in scleroderma patients. *Journal of Ayurveda and Integrative Medicine*. 2014 2014; 5(1):50-55.
164. O'Connor S, Durand MJ, Hudson M, Baron M, Gaudreault N. Effects of osteopathic manipulative treatment on hand function, disease symptoms and functional status in systemic sclerosis: a series of single-case studies in working women. *International Journal of Osteopathic Medicine*. 2016 2016; 22:21-32.
165. Frech TM, Khanna D, Maranian P, Frech EJ, Sawitzke AD, Murtaugh MA. Probiotics for the treatment of systemic sclerosis-associated gastrointestinal bloating/ distention. *Clin Exp Rheumatol*. 2011 Mar-Apr; 29(2 Suppl 65):S22-25.
166. Ortiz-Santamaria V, Puig C, Soldevilla C, Barata A, Cuquet J, Recasens A. Nutritional support in patients with systemic sclerosis. *Reumatologia Clinica*. 2014 2014; 10(5):283-287.
167. Doerfler B, Allen TS, Southwood C, Brenner D, Hirano I, Sheehan P. Medical Nutrition Therapy for Patients With Advanced Systemic Sclerosis (MNT PASS): A Pilot Intervention Study. *Jpen: Journal of Parenteral & Enteral Nutrition*. 2017 2017; 41(4):678-684.
168. Low AHL, Teng GG, Pettersson S, de Sessions PF, Ho EXP, Fan Q, et al. A double-blind randomized placebo-controlled trial of probiotics in systemic sclerosis associated gastrointestinal disease. *Seminars in Arthritis & Rheumatism*. 2019 2019; 49(3):411-419.
169. Marighela TF, Arismendi MI, Marvulle V, Brunialti MKC, Salomao R, Kayser C. Effect of probiotics on gastrointestinal symptoms and immune parameters in systemic sclerosis: a randomized placebo-controlled trial. *Rheumatology*. 2019 2019; 58(11):1985-1990.
170. Fretheim H, Chung BK, Didriksen H, Baekkevold ES, Midtvedt O, Brunborg C, et al. Fecal microbiota transplantation in systemic sclerosis: A double-blind, placebo-controlled randomized pilot trial. *PLoS ONE [Electronic Resource]*. 2020 2020; 15(5):e0232739.
171. Foerster J, Fleischanderl S, Wittstock S, Storch A, Meffert H, Riemekasten G, et al. Infrared-mediated hyperthermia is effective in the treatment of scleroderma-associated Raynaud's phenomenon. *Journal of Investigative Dermatology*. 2005 2005; 125(6):1313-1316.
172. Murray AK, Moore TL, Richards H, Ennis H, Griffiths CE, Herrick AL. Pilot study of intense pulsed light for the treatment of systemic sclerosis-related telangiectases. *British Journal of Dermatology*. 2012 2012; 167(3):563-569.
173. Dinsdale G, Murray A, Moore T, Ferguson J, Wilkinson J, Richards H, et al. A comparison of intense pulsed light and laser treatment of telangiectases in patients with systemic sclerosis: a within-subject randomized trial. *Rheumatology*. 2014 2014; 53(8):1422-1430.
174. Burillo-Martinez S, Prieto-Barrios M, Velasco-Tamariz V, Tous-Romero F, Lopez-Gomez S, Maronas-Jimenez L. Case series of pulsed dye laser treatment of telangiectasia in 23 patients with systemic sclerosis. *International Journal of Dermatology*. 2017 2017; 56(8):e165-e167.
175. Rosholm Comstedt L, Svensson A, Hesselstrand R, Lehti L, Troilius Rubin A. Effects of intense pulsed light in microstomia in patients with systemic sclerosis: A pilot study. *Journal of Cosmetic & Laser Therapy*. 2017 2017; 19(3):143-148.
176. Hughes M, Moore T, Manning J, Wilkinson J, Watson S, Samraj P, et al. A feasibility study of a novel low-level light therapy for digital ulcers in systemic sclerosis. *Journal of Dermatological Treatment*. 2019 2019; 30(3):251-257.
177. Tinazzi E, Amelio E, Marangoni E, Guerra C, Puccetti A, Codella OM, et al. Effects of shock wave therapy in the skin of patients with progressive systemic sclerosis: a pilot study. *Rheumatology International*. 2011 2011; 31(5):651-656.
178. Belloli L, Cugno M, D'Agostino MC, Ughi N, Tedeschi A, Respizzi S, et al. Shock wave therapy for systemic sclerosis. *Rheumatol Int*. 2013 Apr; 33(4):1099-1100.
179. Saito S, Ishii T, Ito K, Shimokawa H. Extracorporeal shock wave therapy for digital ulcers associated with systemic sclerosis. *Journal of Scleroderma and Related Disorders*. 2016 2016; 1(2):181-185.
180. Saito S, Ishii T, Kamogawa Y, Watanabe R, Shirai T, Fujita Y, et al. Extracorporeal Shock Wave Therapy for Digital Ulcers of Systemic Sclerosis: A Phase 2 Pilot Study. *Tohoku Journal of Experimental Medicine*. 2016 2016; 238(1):39-47.
181. Poole J, Conte C, Brewer C, Good CC, Perella D, Rossie KM, et al. Oral hygiene in scleroderma: The effectiveness of a multi-disciplinary intervention program. *Disability & Rehabilitation*. 2010 2010; 32(5):379-384.
182. Schouffoer AA, Ninaber MK, Beart-van de Voorde LJ, van der Giesen FJ, de Jong Z, Stolk J, et al. Randomized comparison of a multidisciplinary team care program with usual care in patients with systemic sclerosis. *Arthritis care & research*. 2011 2011; 63(6):909-917.
183. Mirasoglu B, Bagli BS, Aktas S. Hyperbaric oxygen therapy for chronic ulcers in systemic sclerosis - case series. *International Journal of Dermatology*. 2017 2017; 56(6):636-640.
184. Hassanien M, Rashad S, Mohamed N, Elawamy A, Ghaly MS. Non-invasive Oxygen-Ozone therapy in treating digital ulcers of patients with systemic sclerosis. *Acta Reumatologica Portuguesa*. 2018 2018; 43(3):210-216.
185. Yuen HK, Westwater C, Degarmo J, Bandyopadhyay D. Immediate Effect of Xylitol Chewing Gum and Mouth Rinse on Salivary Levels of Mutans Streptococci in Adults with Systemic Sclerosis: A Pilot Study. *Journal of Experimental & Integrative Medicine*. 2012 2012; 2(1):89-92.
186. Onesti MG, Fioramonti P, Carella S, Fino P, Marchese C, Scuderi N. Improvement of Mouth Functional Disability in Systemic Sclerosis Patients over One Year in a Trial of Fat Transplantation versus Adipose-Derived Stromal Cells. *Stem Cells Int*. 2016; 2016:2416192.
187. Parisi S, Celletti C, Scarati M, Priora M, Laganà A, Peroni CL, et al. Neuromuscular taping enhances hand function in patients with systemic sclerosis: a pilot study. *Clin Ter*. 2017 Nov-Dec; 168(6):e371-e375.
188. Fiori G, Marzi T, Bartoli F, Bruni C, Ciceroni C, Palomba M, et al. The challenge of pet therapy in systemic sclerosis: evidence for an impact on pain, anxiety, neuroticism and social interaction. *Clin Exp Rheumatol*. 2018 Jul-Aug; 36 Suppl 113(4):135-141.
189. Frech TM, McNeill C, Lebiedz-Odrobina D, Lewis G. Amniotic membrane dressings: an effective therapy for SSC-related wounds. *Rheumatology (Oxford)*; 2019:734-736.
190. (Editor) AE, (Editor) MZ. *JBI Manual for Evidence Synthesis*. JBI Manual for Evidence Synthesis 2020 [cited 2022 February 25]; Available from: <https://synthesismanual.jbi.global>

## Supplemental Table S4

## CRITICAL APPRAISAL OF RANDOMISED CONTROLLED TRIALS (STUDY TYPE 11; N = 81)

| Reference/Questions* and LoE** | 1 | 2 | 3 | 4 | 5 | 6 | 7 | 8 | 9 | 10 | 11 | 12 | 13 | 14 | LoE |
|--------------------------------|---|---|---|---|---|---|---|---|---|----|----|----|----|----|-----|
| SLE                            |   |   |   |   |   |   |   |   |   |    |    |    |    |    |     |
| Ramsey-Goldman, 2000 [1]       | N | U | N | U | U | U | Y | Y | Y | Y  | Y  | N  | Y  | W  | 3   |
| Dobkin, 2002 [2]               | U | U | Y | U | U | U | Y | Y | Y | Y  | Y  | Y  | Y  | I  | 2   |
| Shah, 2002 [3]                 | U | U | Y | U | U | U | Y | N | N | Y  | U  | Y  | Y  | W  | 3   |
| Edworthy, 2003 [4]             | U | U | Y | U | U | U | Y | U | U | Y  | U  | Y  | Y  | W  | 3   |
| Tench, 2003 [5]                | N | U | Y | U | U | U | Y | Y | Y | Y  | Y  | Y  | Y  | I  | 2   |
| Duffy, 2004 [6]                | U | U | N | Y | U | U | Y | N | N | Y  | U  | Y  | Y  | W  | 3   |
| Greco, 2004 [7]                | U | U | Y | N | U | Y | Y | Y | Y | Y  | Y  | Y  | Y  | I  | 2   |
| Karlson, 2004 [8]              | N | U | Y | U | U | U | Y | N | Y | Y  | Y  | Y  | Y  | W  | 3   |
| Shah, 2004 [9]                 | U | U | Y | U | U | U | Y | N | N | Y  | N  | Y  | Y  | W  | 3   |
| Wen, 2007 [10]                 | Y | U | Y | U | U | U | Y | N | N | Y  | U  | Y  | Y  | W  | 3   |
| Greco, 2008 [11]               | Y | Y | N | U | U | Y | Y | Y | Y | Y  | U  | Y  | Y  | I  | 2   |
| Navarrete-Navarrete, 2010 [12] | U | U | Y | U | U | U | Y | N | N | Y  | Y  | Y  | Y  | W  | 3   |
| Navarrete-Navarrete, 2010 [13] | N | U | Y | U | U | U | Y | U | U | Y  | Y  | Y  | Y  | W  | 3   |
| Liao, 2011 [14]                | Y | Y | Y | Y | Y | Y | Y | N | N | Y  | U  | Y  | Y  | I  | 2   |
| Brown, 2012 [15]               | U | U | N | U | U | U | Y | N | Y | Y  | Y  | Y  | Y  | W  | 3   |
| Davies, 2012 [16]              | N | U | U | U | U | U | Y | Y | Y | Y  | Y  | Y  | Y  | W  | 3   |
| Ganachari, 2012 [17]           | Y | U | U | U | U | U | Y | N | N | Y  | N  | Y  | Y  | W  | 3   |
| Khajehdehi, 2012 [18]          | U | U | Y | Y | U | Y | Y | Y | Y | Y  | U  | Y  | Y  | I  | 2   |
| Miossi, 2012 [19]              | U | U | Y | U | U | U | Y | N | Y | Y  | U  | Y  | Y  | W  | 3   |
| Ting, 2012 [20]                | U | U | Y | U | U | U | Y | U | U | Y  | U  | Y  | Y  | W  | 3   |
| Linda, 2013 [21]               | Y | Y | Y | N | N | Y | Y | N | Y | Y  | U  | Y  | Y  | I  | 2   |
| Williams, 2014 [22]            | U | U | Y | U | U | U | Y | N | N | Y  | U  | Y  | Y  | W  | 3   |
| Williams, 2014 [23]            | U | U | Y | U | U | U | U | N | N | Y  | U  | Y  | U  | W  | 3   |
| Benatti, 2015 [24]             | Y | U | Y | U | U | U | Y | N | N | Y  | U  | Y  | Y  | W  | 3   |
| Bogdanovic, 2015 [25]          | U | U | U | U | U | U | Y | U | U | Y  | U  | Y  | U  | W  | 3   |
| Abrahao, 2016 [26]             | Y | Y | Y | N | U | U | Y | N | Y | Y  | Y  | Y  | Y  | I  | 2   |
| Avaux, 2016 [27]               | N | U | Y | U | U | U | Y | N | U | Y  | Y  | Y  | Y  | W  | 3   |
| Bostrom, 2016 [28]             | N | Y | Y | N | N | Y | Y | Y | Y | Y  | Y  | Y  | Y  | I  | 2   |
| Zhang, 2016 [29]               | U | U | Y | U | U | U | Y | U | U | Y  | U  | Y  | Y  | W  | 3   |
| Shamekhi, 2017 [30]            | Y | Y | N | Y | Y | U | Y | N | N | Y  | U  | Y  | Y  | I  | 2   |
| Solati, 2017 [31]              | U | U | Y | U | U | U | Y | Y | Y | Y  | Y  | Y  | Y  | I  | 2   |
| Benatti, 2018 [32]             | U | U | Y | U | U | U | Y | Y | N | Y  | U  | Y  | Y  | W  | 3   |
| Rothman, 2018 [33]             | U | U | U | U | U | U | Y | U | U | Y  | U  | Y  | Y  | W  | 3   |
| Scalzi, 2018 [34]              | U | U | Y | U | U | U | Y | Y | N | Y  | U  | Y  | Y  | W  | 3   |
| Xie, 2018 [35]                 | U | Y | Y | N | U | Y | Y | N | N | Y  | Y  | Y  | Y  | I  | 2   |

| Reference/Questions* and LoE** | 1 | 2 | 3 | 4 | 5 | 6 | 7 | 8 | 9 | 10 | 11 | 12 | 13 | 14 | LoE |   |
|--------------------------------|---|---|---|---|---|---|---|---|---|----|----|----|----|----|-----|---|
| Conceição [36], 2019           | Y | N | Y | N | U | Y | Y | N | Y | Y  | Y  | Y  | Y  | I  | 2   |   |
| Wu, 2019 [37]                  | Y | U | Y | U | U | Y | Y | N | Y | Y  | N  | Y  | Y  | I  | 2   |   |
| Zhang, 2019 [38]               | Y | U | Y | U | U | U | Y | N | N | Y  | U  | Y  | Y  | W  | 3   |   |
| Harry, 2020 [39]               | Y | U | N | U | U | U | Y | Y | N | Y  | N  | Y  | Y  | W  | 3   |   |
| Kankaya, 2020 [40]             | Y | U | N | N | U | U | Y | Y | N | Y  | Y  | Y  | Y  | W  | 3   |   |
| Keramiotou, 2020 [41]          | Y | N | N | N | N | U | Y | N | N | Y  | Y  | Y  | Y  | W  | 3   |   |
| Khan, 2020 [42]                | Y | N | Y | N | U | U | Y | N | N | Y  | Y  | Y  | Y  | W  | 3   |   |
| Oliveira, 2020 [43]            | Y | U | N | U | U | U | Y | Y | N | Y  | Y  | Y  | Y  | W  | 3   |   |
| Allen, 2021 [44]               | U | U | Y | U | U | U | Y | N | Y | Y  | Y  | Y  | Y  | W  | 3   |   |
| Aranow, 2021 [45]              | Y | U | Y | Y | N | Y | Y | Y | N | Y  | Y  | Y  | Y  | I  | 2   |   |
| Dionello, 2021 [46]            | Y | Y | Y | Y | Y | U | N | N | N | Y  | U  | Y  | Y  | I  | 2   |   |
| Lopes-Souza, 2021 [47]         | U | U | N | U | U | U | Y | N | N | Y  | U  | Y  | Y  | W  | 3   |   |
| White, 2021 [48]               | Y | U | U | U | N | N | Y | N | N | Y  | Y  | Y  | Y  | W  | 3   |   |
| Xu, 2021 [49]                  | U | U | Y | U | U | U | Y | U | U | Y  | Y  | Y  | Y  | W  | 3   |   |
| <b>Ssc</b>                     |   |   |   |   |   |   |   |   |   |    |    |    |    |    |     |   |
| Bongi, 2009 [50]               | Y | Y | Y | U | N | U | Y | Y | Y | Y  | Y  | Y  | Y  | Y  | I   | 2 |
| Maddali Bongi, 2009 [51]       | Y | U | Y | U | U | U | Y | Y | Y | N  | U  | Y  | Y  | W  | 3   |   |
| Bongi, 2011 [52]               | Y | Y | Y | N | N | Y | Y | Y | Y | Y  | Y  | Y  | Y  | R  | 2   |   |
| Maddali Bongi, 2011 [53]       | Y | U | Y | U | U | U | Y | Y | Y | Y  | Y  | Y  | Y  | I  | 2   |   |
| Schouffoer, 2011 [54]          | N | U | Y | U | N | Y | Y | Y | Y | Y  | Y  | Y  | Y  | I  | 2   |   |
| Yuen, 2011 [55]                | N | U | U | Y | U | Y | Y | N | U | Y  | Y  | Y  | Y  | W  | 3   |   |
| Sporbeck, 2012 [56]            | U | U | N | U | U | U | U | U | U | Y  | U  | Y  | U  | W  | 3   |   |
| Yuen, 2012 [57]                | Y | N | N | Y | N | Y | Y | Y | Y | Y  | Y  | Y  | Y  | I  | 2   |   |
| Yuen, 2012 [58]                | U | U | Y | U | N | Y | Y | Y | Y | Y  | Y  | Y  | U  | I  | 2   |   |
| Piga, 2014 [59]                | Y | U | Y | U | U | U | N | N | N | Y  | Y  | Y  | Y  | W  | 3   |   |
| Vannajak, 2014 [60]            | U | U | N | U | U | U | Y | U | U | U  | U  | Y  | Y  | W  | 3   |   |
| Stefanantoni, 2016 [61]        | U | U | Y | Y | N | Y | Y | U | U | Y  | Y  | Y  | Y  | I  | 2   |   |
| Rannou, 2017 [62]              | Y | Y | Y | Y | U | Y | Y | Y | Y | Y  | Y  | Y  | Y  | R  | 2   |   |
| Hassanien, 2018 [63]           | Y | U | Y | U | U | U | Y | U | U | Y  | U  | Y  | Y  | W  | 3   |   |
| Mitropoulos, 2018 [64]         | U | U | N | U | U | U | U | N | N | Y  | U  | Y  | Y  | W  | 3   |   |
| Zhou, 2018 [65]                | Y | Y | Y | Y | U | U | Y | N | N | Y  | U  | Y  | Y  | I  | 2   |   |
| Dewi, 2019 [66]                | Y | Y | N | Y | Y | Y | Y | N | N | Y  | U  | Y  | Y  | I  | 2   |   |
| Gregory, 2019 [67]             | Y | Y | Y | N | N | Y | Y | Y | N | Y  | Y  | Y  | Y  | I  | 2   |   |
| Khanna, 2019 [68]              | Y | U | N | U | N | U | N | N | N | N  | Y  | Y  | Y  | W  | 3   |   |
| Kristensen, 2019 [69]          | Y | Y | N | N | N | Y | Y | N | N | Y  | Y  | Y  | Y  | I  | 2   |   |
| Lange, 2019 [70]               | Y | U | Y | U | U | Y | Y | Y | Y | Y  | Y  | Y  | Y  | I  | 2   |   |
| Low, 2019 [71]                 | Y | Y | N | Y | Y | Y | Y | N | Y | Y  | U  | Y  | Y  | I  | 2   |   |
| Marighela, 2019 [72]           | N | U | Y | Y | U | U | Y | U | U | Y  | U  | Y  | Y  | W  | 3   |   |
| Mitropoulos, 2019 [73]         | Y | U | U | N | U | U | Y | U | Y | Y  | U  | Y  | Y  | W  | 3   |   |
| Uras, 2019 [74]                | Y | Y | N | U | N | Y | Y | Y | Y | Y  | Y  | Y  | Y  | I  | 2   |   |
| Cetin, 2020 [75]               | Y | U | Y | U | U | U | Y | N | N | Y  | U  | Y  | Y  | W  | 3   |   |

| Reference/Questions* and LoE** | 1 | 2 | 3 | 4 | 5 | 6 | 7 | 8 | 9 | 10 | 11 | 12 | 13 | 14 | LoE |
|--------------------------------|---|---|---|---|---|---|---|---|---|----|----|----|----|----|-----|
| Filippetti, 2020 [76]          | Y | U | N | U | U | Y | Y | Y | Y | Y  | Y  | Y  | Y  | I  | 2   |
| Fretheim, 2020 [77]            | Y | Y | N | Y | Y | Y | Y | Y | N | Y  | U  | Y  | Y  | I  | 2   |
| Cüzdán, 2021 [78]              | Y | Y | N | Y | U | Y | Y | N | N | Y  | Y  | Y  | Y  | I  | 2   |
| Gokcen, 2021 [79]              | Y | Y | N | Y | N | Y | Y | N | N | Y  | Y  | Y  | Y  | I  | 2   |
| Maddali Bongí, 2021 [80]       | U | U | Y | U | U | U | N | U | U | Y  | U  | Y  | N  | W  | 3   |
| Murphy, 2021 [81]              | U | U | Y | U | N | N | N | N | Y | N  | N  | Y  | Y  | W  | 3   |

**\*Questions (according to the Joanna Briggs Institute critical appraisal tools [82]):**

1. Was true randomization used for assignment of participants to treatment groups?
2. Was allocation to treatment groups concealed?
3. Were treatment groups similar at the baseline?
4. Were participants blind to treatment assignment?
5. Were those delivering treatment blind to treatment assignment?
6. Were outcomes assessors blind to treatment assignment?
7. Were treatment groups treated identically other than the intervention of interest?
8. Was follow up complete and if not, were differences between groups in terms of their follow up adequately described and analysed?
9. Were participants analysed in the groups to which they were randomized?
10. Were outcomes measured in the same way for treatment groups?
11. Were outcomes measured in a reliable way?
12. Was appropriate statistical analysis used?
13. Was the trial design appropriate, and any deviations from the standard RCT design (individual randomization, parallel groups) accounted for in the conduct and analysis of the trial?
14. Overall appraisal?

**\*\*LoE: Levels of evidence according to the Oxford Centre for Evidence-Based Medicine [83]**

| Cell | Interpretation       |
|------|----------------------|
| Y/R  | Yes/robust           |
| N/W  | No/weak              |
| U/I  | Unclear/intermediate |
| /    | Not applicable       |

**References:**

1. Ramsey-Goldman R, Schilling EM, Dunlop D, Langman C, Greenland P, Thomas RJ, et al. A pilot study on the effects of exercise in patients with systemic lupus erythematosus. *Arthritis Care & Research*. 2000 2000; 13(5):262-269.
2. Dobkin PL, Da Costa D, Joseph L, Fortin PR, Edworthy S, Barr S, et al. Counterbalancing patient demands with evidence: results from a pan-Canadian randomized clinical trial of brief supportive-expressive group psychotherapy for women with systemic lupus erythematosus. *Annals of Behavioral Medicine*. 2002 2002; 24(2):88-99.
3. Shah M, Kavanaugh A, Coyle Y, Adams-Huet B, Lipsky PE. Effect of a culturally sensitive cholesterol lowering diet program on lipid and lipoproteins, body weight, nutrient intakes, and quality of life in patients with systemic lupus erythematosus. *Journal of Rheumatology*. 2002 2002; 29(10):2122-2128.
4. Edworthy SM, Dobkin PL, Clarke AE, Da Costa D, Dritsa M, Fortin PR, et al. Group psychotherapy reduces illness intrusiveness in systemic lupus erythematosus. *Journal of Rheumatology*. 2003 2003; 30(5):1011-1016.
5. Tench CM, McCarthy J, McCurdie I, White PD, D'Cruz DP. Fatigue in systemic lupus erythematosus: a randomized controlled trial of exercise. *Rheumatology*. 2003 2003; 42(9):1050-1054.

6. Duffy EM, Meenagh GK, McMillan SA, Strain JJ, Hannigan BM, Bell AL. The clinical effect of dietary supplementation with omega-3 fish oils and/or copper in systemic lupus erythematosus. *Journal of Rheumatology*. 2004 2004; 31(8):1551-1556.
7. Greco CM, Rudy TE, Manzi S. Effects of a stress-reduction program on psychological function, pain, and physical function of systemic lupus erythematosus patients: a randomized controlled trial. *Arthritis & Rheumatism*. 2004 2004; 51(4):625-634.
8. Karlson EW, Liang MH, Eaton H, Huang J, Fitzgerald L, Rogers MP, et al. A randomized clinical trial of a psychoeducational intervention to improve outcomes in systemic lupus erythematosus. *Arthritis & Rheumatism*. 2004 2004; 50(6):1832-1841.
9. Shah M, Adams-Huet B, Kavanaugh A, Coyle Y, Lipsky P. Nutrient intake and diet quality in patients with systemic lupus erythematosus on a culturally sensitive cholesterol lowering dietary program. *Journal of Rheumatology*. 2004 2004; 31(1):71-75.
10. Wen CP, Fan YS, Wang XC, Li XY, Lu KD. Effect of detoxification, removing stasis and nourishing yin method on corticosteroid-induced hyperlipidemia in patients with systemic lupus erythematosus. *Chinese Journal of Integrative Medicine*. 2007 2007; 13(3):180-184.
11. Greco CM, Kao AH, Maksimowicz-McKinnon K, Glick RM, Houze M, Sereika SM, et al. Acupuncture for systemic lupus erythematosus: a pilot RCT feasibility and safety study. *Lupus*. 2008 2008; 17(12):1108-1116.
12. Navarrete-Navarrete N, Peralta-Ramirez MI, Sabio-Sanchez JM, Coin MA, Robles-Ortega H, Hidalgo-Tenorio C, et al. Efficacy of cognitive behavioural therapy for the treatment of chronic stress in patients with lupus erythematosus: a randomized controlled trial. *Psychotherapy & Psychosomatics*. 2010 2010; 79(2):107-115.
13. Navarrete-Navarrete N, Peralta-Ramirez MI, Sabio JM, Martinez-Egea I, Santos-Ruiz A, Jimenez-Alonso J. Quality-of-life predictor factors in patients with SLE and their modification after cognitive behavioural therapy. *Lupus*. 2010 2010; 19(14):1632-1639.
14. Liao YN, Liu CS, Tsai TR, Hung YC, Chang SJ, Lin HL, et al. Preliminary study of a traditional Chinese medicine formula in systemic lupus erythematosus patients to taper steroid dose and prevent disease flare-up. *Kaohsiung Journal of Medical Sciences*. 2011 2011; 27(7):251-257.
15. Brown RT, Shaftman SR, Tilley BC, Anthony KK, Kral MC, Maxson B, et al. The health education for lupus study: a randomized controlled cognitive-behavioral intervention targeting psychosocial adjustment and quality of life in adolescent females with systemic lupus erythematosus. *American Journal of the Medical Sciences*. 2012 2012; 344(4):274-282.
16. Davies RJ, Lomer MC, Yeo SI, Avloniti K, Sangle SR, D'Cruz DP. Weight loss and improvements in fatigue in systemic lupus erythematosus: a controlled trial of a low glycaemic index diet versus a calorie restricted diet in patients treated with corticosteroids. *Lupus*. 2012 2012; 21(6):649-655.
17. Ganachari MS, Almas SA. Evaluation of clinical pharmacist mediated education and counselling of systemic lupus erythematosus patients in tertiary care hospital. *Indian Journal of Rheumatology*. 2012 2012; 7(1):7-12.
18. Khajehdehi P, Zanjaninejad B, Aflaki E, Nazarinia M, Azad F, Malekmakan L, et al. Oral supplementation of turmeric decreases proteinuria, hematuria, and systolic blood pressure in patients suffering from relapsing or refractory lupus nephritis: a randomized and placebo-controlled study. *Journal of Renal Nutrition*. 2012 2012; 22(1):50-57.
19. Miossi R, Benatti FB, Luciane de Sa Pinto A, Lima FR, Borba EF, Prado DM, et al. Using exercise training to counterbalance chronotropic incompetence and delayed heart rate recovery in systemic lupus erythematosus: a randomized trial. *Arthritis care & research*. 2012 2012; 64(8):1159-1166.
20. Ting TV, Kudalkar D, Nelson S, Cortina S, Pendl J, Budhani S, et al. Usefulness of cellular text messaging for improving adherence among adolescents and young adults with systemic lupus erythematosus. *Journal of Rheumatology*. 2012 2012; 39(1):174-179.
21. Linda LDZ, Zhao Xiang B, Jun Hua G, Xin Z, Yu T, Jian Chun M, et al. Chinese Herbal Medicine (Zi Shen Qing) for Mild-to-Moderate Systemic Lupus Erythematosus: A Pilot Prospective, Single-Blinded, Randomized Controlled Study. *Evidence-based Complementary & Alternative Medicine (eCAM)*. 2013 2013; 2013:1-10.
22. Williams EM, Penfield M, Kamen D, Oates JC. An Intervention to Reduce Psychosocial and Biological Indicators of Stress in African American Lupus Patients: The Balancing Lupus Experiences with Stress Strategies Study. *Open J Prev Med*. 2014 Jan; 4(1):22-31.
23. Williams EM, Bruner L, Penfield M, Kamen D, Oates JC. Stress and Depression in Relation to Functional Health Behaviors in African American Patients with Systemic Lupus Erythematosus. *Rheumatology (Sunnyvale)*. 2014; 2014(Suppl 4).
24. Benatti FB, Miossi R, Passarelli M, Nakandakare ER, Perandini L, Lima FR, et al. The effects of exercise on lipid profile in systemic lupus erythematosus and healthy individuals: a randomized trial. *Rheumatology International*. 2015 2015; 35(1):61-69.
25. Bogdanovic G, Stojanovich L, Djokovic A, Stanisavljevic N. Physical Activity Program Is Helpful for Improving Quality of Life in Patients with Systemic Lupus Erythematosus. *Tohoku Journal of Experimental Medicine*. 2015 2015; 237(3):193-199.
26. Abrahao MI, Gomiero AB, Peccin MS, Grande AJ, Trevisani VF. Cardiovascular training vs. resistance training for improving quality of life and physical function in patients with systemic lupus erythematosus: a randomized controlled trial. *Scandinavian Journal of Rheumatology*. 2016 2016; 45(3):197-201.
27. Avaux M, Hoellinger P, Nieuwland-Husson S, Fraselle V, Depresseux G, Houssiau FA. Effects of two different exercise programs on chronic fatigue in lupus patients. *Acta Clinica Belgica*. 2016 2016; 71(6):403-406.
28. Bostrom C, Elfving B, Dupre B, Opava CH, Lundberg IE, Jansson E. Effects of a one-year physical activity programme for women with systemic lupus erythematosus - a randomized controlled study. *Lupus*. 2016 2016; 25(6):602-616.
29. Zhang X, Tian Y, Li J, Zhao X. Effect of targeted nursing applied to SLE patients. *Experimental & Therapeutic Medicine*. 2016 2016; 11(6):2209-2212.
30. Shamekhi Z, Amani R, Habibagahi Z, Namjoan F, Ghadiri A, Saki Malehi A. A Randomized, Double-blind, Placebo-controlled Clinical Trial Examining the Effects of Green Tea Extract on Systemic Lupus Erythematosus Disease Activity and Quality of Life. *Phytotherapy Research*. 2017 2017; 31(7):1063-1071.
31. Solati K, Mousavi M, Kheiri S, Hasanpour-Dehkordi A. The Effectiveness of Mindfulness-based Cognitive Therapy on Psychological Symptoms and Quality of Life in Systemic Lupus Erythematosus Patients: A Randomized Controlled Trial. *Oman Medical Journal*. 2017 2017; 32(5):378-385.
32. Benatti FB, Miyake CNH, Dantas WS, Zambelli VO, Shinjo SK, Pereira RMR, et al. Exercise Increases Insulin Sensitivity and Skeletal Muscle AMPK Expression in Systemic Lupus Erythematosus: A Randomized Controlled Trial. *Frontiers in Immunology*. 2018 2018; 9:906.
33. Rothman D, Khan F, Rudin V. Individualized Diet and Lifestyle Modifications Reverse Symptoms of Systemic Lupus Erythematosus. *Journal of Medical Internet Research*. 2018 2018; 20(9):21-21.
34. Scalzi LV, Hollenbeak CS, Mascuilli E, Olsen N. Improvement of medication adherence in adolescents and young adults with SLE using web-based education with and without a social media intervention, a pilot study. *Pediatric Rheumatology Online Journal*. 2018 2018; 16(1):18.
35. Xie X, Song Y, Yang H, Nie A, Chen H, Li JP. Effects of transitional care on self-care, readmission rates, and quality of life in adult patients with systemic lupus erythematosus: a randomized controlled trial. *Arthritis Research & Therapy*. 2018 2018; 20(1):184.
36. Conceição CTM, Meinão IM, Bombana JA, Sato EI. Psychoanalytic psychotherapy improves quality of life, depression, anxiety and coping in patients with systemic lupus erythematosus: a controlled randomized clinical trial. *Adv Rheumatol*. 2019 Jan 22; 59(1):4.
37. Wu ML, Tsai JC, Yu KH, Chen JJ. Effects of physical activity counselling in women with systemic lupus erythematosus: A randomized controlled trial. *International Journal of Nursing Practice*. 2019 2019; 25(5):e12770.
38. Zhang L, Geng S, Qian L, Ye S, Wang X, Lu G, et al. Multidisciplinary care in patients with systemic lupus erythematosus: a randomized controlled trial in China. *Int J Clin Pharm*. 2019 Oct; 41(5):1247-1255.
39. Harry O, Crosby LE, Mara C, Ting TV, Huggins JL, Modi AC. Feasibility and acceptability of an innovative adherence intervention for young adults with childhood-onset systemic Lupus Erythematosus. *Pediatric Rheumatology Online Journal*. 2020 2020; 18(1):36.



40. Kankaya H, Karadakovan A. Effects of web-based education and counselling for patients with systemic lupus erythematosus: self-efficacy, fatigue and assessment of care. *Lupus*. 2020 Jul; 29(8):884-891.
41. Keramiotou K, Anagnostou C, Kataxaki E, Galanos A, Sfikakis PP, Tektonidou MG. The impact of upper limb exercise on function, daily activities and quality of life in systemic lupus erythematosus: a pilot randomised controlled trial. *RMD Open*. 2020 2020; 6(1):01.
42. Khan F, Granville N, Malkani R, Chathampally Y. Health-Related Quality of Life Improvements in Systemic Lupus Erythematosus Derived from a Digital Therapeutic Plus Tele-Health Coaching Intervention: Randomized Controlled Pilot Trial. *J Med Internet Res*. 2020 Oct 20; 22(10):e23868.
43. Oliveira FAP, Santos F, Dias A, Neiva CLS, Telles RW, Lanna CCD. Cosmetic camouflage improves health-related quality of life in women with systemic lupus erythematosus and permanent skin damage: A controlled intervention study. *Lupus*. 2020 2020; 29(11):1438-1448.
44. Allen KD, Beauchamp T, Rini C, Keefe FJ, Bennell KL, Cleveland RJ, et al. Pilot study of an internet-based pain coping skills training program for patients with systemic Lupus Erythematosus. *BMC Rheumatol*. 2021 Jun 17; 5(1):20.
45. Aranow C, Atish-Fregoso Y, Lesser M, Mackay M, Anderson E, Chavan S, et al. Transcutaneous auricular vagus nerve stimulation reduces pain and fatigue in patients with systemic lupus erythematosus: a randomised, double-blind, sham-controlled pilot trial. *Annals of the Rheumatic Diseases*. 2021 2021; 80(2):203-208.
46. Dionello CF, Souza PL, Rosa PV, Santana A, Marchon R, Morel DS, et al. Acute Neuromuscular Responses to Whole-Body Vibration of Systemic Lupus Erythematosus Individuals: A Randomized Pilot Study. *Applied Sciences-Basel*. 2021 2021; 11(1).
47. Lopes-Souza P, Dionello CF, Bernardes-Oliveira CL, Moreira-Marconi E, Marchon RM, Teixeira-Silva Y, et al. Effects of 12-week whole-body vibration exercise on fatigue, functional ability and quality of life in women with systemic lupus erythematosus: A randomized controlled trial. *Journal of Bodywork and Movement Therapies*. 2021 2021; 27:191-199.
48. White AA, Ba A, Faith TD, Ramakrishnan V, Dismuke-Greer CL, Oates JC, et al. The Care-coordination Approach to Learning Lupus Self-Management: a patient navigator intervention for systemic lupus inpatients. *Lupus Science & Medicine*. 2021 2021; 8(1).
49. Xu HY, Teng Q, Zeng Y, Tian CP, Yang BW, Yao XL. Psychoeducational Intervention Benefits the Quality of Life of Patients with Active Systemic Lupus Erythematosus. *Journal of Nanomaterials*. 2021 2021; 2021.
50. Bongli SM, Del Rosso A, Galluccio F, Sigismondi F, Miniati I, Conforti ML, et al. Efficacy of connective tissue massage and Mc Mennell joint manipulation in the rehabilitative treatment of the hands in systemic sclerosis. *Clinical Rheumatology*. 2009 2009; 28(10):1167-1173.
51. Maddali Bongli S, Del Rosso A, Galluccio F, Tai G, Sigismondi F, Passalacqua M, et al. Efficacy of a tailored rehabilitation program for systemic sclerosis. *Clin Exp Rheumatol*. 2009 May-Jun; 27(3 Suppl 54):44-50.
52. Bongli SM, Del Rosso A, Passalacqua M, Miccio S, Cerinic MM. Manual lymph drainage improving upper extremity edema and hand function in patients with systemic sclerosis in edematous phase. *Arthritis care & research*. 2011 2011; 63(8):1134-1141.
53. Maddali-Bongli S, Landi G, Galluccio F, Del Rosso A, Miniati I, Conforti ML, et al. The rehabilitation of facial involvement in systemic sclerosis: efficacy of the combination of connective tissue massage, Kabat's technique and kinesiotherapy: a randomized controlled trial. *Rheumatology International*. 2011 2011; 31(7):895-901.
54. Schouffoer AA, Ninaber MK, Beart-van de Voorde LJ, van der Giesen FJ, de Jong Z, Stolk J, et al. Randomized comparison of a multidisciplinary team care program with usual care in patients with systemic sclerosis. *Arthritis care & research*. 2011 2011; 63(6):909-917.
55. Yuen HK, Weng Y, Bandyopadhyay D, Reed SG, Leite RS, Silver RM. Effect of a multi-faceted intervention on gingival health among adults with systemic sclerosis. *Clinical & Experimental Rheumatology*. 2011 2011; 29(2):S26-32.
56. Sporbeck B, Mathiske-Schmidt K, Jahr S, Huscher D, Becker M, Riemekasten G, et al. Effect of biofeedback and deep oscillation on Raynaud's phenomenon secondary to systemic sclerosis: results of a controlled prospective randomized clinical trial. *Rheumatology International*. 2012 2012; 32(5):1469-1473.
57. Yuen HK, Marlow NM, Reed SG, Mahoney S, Summerlin LM, Leite R, et al. Effect of orofacial exercises on oral aperture in adults with systemic sclerosis. *Disability & Rehabilitation*. 2012 2012; 34(1):84-89.
58. Yuen HK, Westwater C, Degarmo J, Bandyopadhyay D. Immediate Effect of Xylitol Chewing Gum and Mouth Rinse on Salivary Levels of Mutans Streptococci in Adults with Systemic Sclerosis: A Pilot Study. *Journal of Experimental & Integrative Medicine*. 2012 2012; 2(1):89-92.
59. Piga M, Tradori I, Pani D, Barabino G, Dessi A, Raffo L, et al. Telemedicine applied to kinesiotherapy for hand dysfunction in patients with systemic sclerosis and rheumatoid arthritis: recovery of movement and telemonitoring technology. *Journal of Rheumatology*. 2014 2014; 41(7):1324-1333.
60. Vannajak K, Boonprakob Y, Eungpinichpong W, Ungpansattawong S, Nanagara R. The short-term effect of gloving in combination with Traditional Thai Massage, heat, and stretching exercise to improve hand mobility in scleroderma patients. *Journal of Ayurveda and Integrative Medicine*. 2014 2014; 5(1):50-55.
61. Stefanantoni K, Sciarra I, Iannace N, Vasile M, Caucci M, Sili Scavalli A, et al. Occupational therapy integrated with a self-administered stretching program on systemic sclerosis patients with hand involvement. *Clin Exp Rheumatol*. 2016 Sep-Oct; 34 Suppl 100(5):157-161.
62. Rannou F, Boutron I, Mouthon L, Sanchez K, Tiffreau V, Hachulla E, et al. Personalized Physical Therapy Versus Usual Care for Patients With Systemic Sclerosis: A Randomized Controlled Trial. *Arthritis care & research*. 2017 2017; 69(7):1050-1059.
63. Hassanien M, Rashad S, Mohamed N, Elawamy A, Ghaly MS. Non-invasive Oxygen-Ozone therapy in treating digital ulcers of patients with systemic sclerosis. *Acta Reumatologica Portuguesa*. 2018 2018; 43(3):210-216.
64. Mitropoulos A, Gumber A, Crank H, Akil M, Klonizakis M. The effects of upper and lower limb exercise on the microvascular reactivity in limited cutaneous systemic sclerosis patients. *Arthritis Res Ther*. 2018 Jun 5; 20(1):112.
65. Zhou J, Yang D, Zhou SH, Wang JP, Liu YS, Wang SL. Clinical Efficacy and Safety of Bathing with Chinese Medicine Taohong Siwu Decoction ( ) for Treatment of Diffuse Cutaneous Systemic Sclerosis: A Randomized Placebo-Controlled Trial. *Chinese Journal of Integrative Medicine*. 2018 2018; 24(3):185-192.
66. Dewi S, Isbagio H, Purwaningsih EH, Kertia N, Setiabudy R, Setiati S. A Double-blind, Randomized Controlled Trial of Ciplukan (*Physalis angulata* Linn) Extract on Skin Fibrosis, Inflammatory, Immunology, and Fibrosis Biomarkers in Scleroderma Patients. *Acta Medica Indonesiana*. 2019 2019; 51(4):303-310.
67. Gregory WJ, Wilkinson J, Herrick AL. A randomised controlled trial of wax baths as an additive therapy to hand exercises in patients with systemic sclerosis. *Physiotherapy*. 2019 2019; 105(3):370-377.
68. Khanna D, Serrano J, Berrocal VJ, Silver RM, Cuencas P, Newbill SL, et al. Randomized Controlled Trial to Evaluate an Internet-Based Self-Management Program in Systemic Sclerosis. *Arthritis care & research*. 2019 2019; 71(3):435-447.
69. Kristensen LQ, Oestergaard LG, Bovbjerg K, Rolving N, Søndergaard K. Use of paraffin instead of lukewarm water prior to hand exercises had no additional effect on hand mobility in patients with systemic sclerosis: A randomized clinical trial. *Hand Therapy*. 2019 2019; 24(1):13-21.
70. Lange U, Bogensperger S, Tarner IH, Müller-Ladner U. The effects of a single carbon dioxide and hot water hand bath on acral perfusion in systemic sclerosis: A randomized, clinical study. *Journal of Scleroderma and Related Disorders*. 2019 2019; 4(2):160-162.
71. Low AHL, Teng GG, Petterson S, de Sessions PF, Ho EXP, Fan Q, et al. A double-blind randomized placebo-controlled trial of probiotics in systemic sclerosis associated gastrointestinal disease. *Seminars in Arthritis & Rheumatism*. 2019 2019; 49(3):411-419.
72. Marighela TF, Arismendi MI, Marvulle V, Brunialti MKC, Salomao R, Kayser C. Effect of probiotics on gastrointestinal symptoms and immune parameters in systemic sclerosis: a randomized placebo-controlled trial. *Rheumatology*. 2019 2019; 58(11):1985-1990.
73. Mitropoulos A, Gumber A, Akil M, Klonizakis M. Exploring the microcirculatory effects of an exercise programme including aerobic and resistance training in people with limited cutaneous systemic sclerosis. *Microvasc Res*. 2019 Sep; 125:103887.

74. Uras C, Mastroeni S, Tabolli S, Masini C, Pallotta S, Teofoli P, et al. A comparison between two educational methods in the rehabilitation of the microstomia in systemic sclerosis: a randomized controlled trial. *Clinical Rehabilitation*. 2019 2019; 33(11):1747-1756.

75. Cetin SY, Calik BB, Ayan A. Investigation of the effectiveness of Tai Chi exercise program in patients with scleroderma: A randomized controlled study. *Complementary Therapies in Clinical Practice*. 2020 2020; 40:101181.

76. Filippetti M, Cazzoletti L, Zamboni F, Ferrari P, Caimmi C, Smania N, et al. Effect of a tailored home-based exercise program in patients with systemic sclerosis: A randomized controlled trial. *Scandinavian Journal of Medicine & Science in Sports*. 2020 2020; 30(9):1675-1684.

77. Fretheim H, Chung BK, Didriksen H, Baekkevold ES, Midtvedt O, Brunborg C, et al. Fecal microbiota transplantation in systemic sclerosis: A double-blind, placebo-controlled randomized pilot trial. *PLoS ONE [Electronic Resource]*. 2020 2020; 15(5):e0232739.

78. Cüzdan N, Türk İ, Çiftçi V, Arslan D, Doğan MC, Ünal İ. The effect of a home-based orofacial exercise program on oral aperture of patients with systemic sclerosis: A single-blind prospective randomized controlled trial. *Archives of Rheumatology*. 2021 2021; 36(2):176-184.

79. Gokcen N, Badak SO, Sarpel T, Sertdemir Y, Erken E. The Efficacy of a Home-Based, Self-Administered Hand Exercise Program for Patients With Systemic Sclerosis: A Randomized Controlled, Evaluator-Blind, Clinical Trial. *JCR: Journal of Clinical Rheumatology*. 2021 2021; 6:06.

80. Maddali Bongji S, Passalacqua M, Landi G, Mikhaylova S, Tofani L, Del Rosso A, et al. Rehabilitation of the face and temporomandibular joint in systemic sclerosis. *Therapeutic Advances in Musculoskeletal Disease*. 2021 2021; 13.

81. Murphy SL, Barber M, Huang S, Sabbagh M, Cutter G, Khanna D. Intensive and App-Delivered Occupational Therapy to Improve Upper Extremity Function in Early Diffuse Cutaneous Systemic Sclerosis: A Pilot Two-Arm Trial. *Rheumatology*. 2021 2021; 11:11.

82. Tufanaru C, Munn Z, Aromataris E, Campbell J, Hopp L, (Editors). Chapter 3: Systematic reviews of effectiveness. *JBI* 2020 [cited 2022 28 Feb]; Available from: <https://synthesismanual.jbi.global>

83. Howick J, Chalmers J, Glasziou P, Greenhalgh T, Heneghan C, Liberati, et al. The Oxford Levels of Evidence 2. 2011 [cited; Available from: <https://www.cebm.ox.ac.uk/resources/levels-of-evidence/ocebml-levels-of-evidence>

## Supplemental Table S5

### CRITICAL APPRAISAL OF QUASI-EXPERIMENTAL STUDIES (STUDY TYPE 10; N = 75)

| Reference/Questions* and LoE** | 1 | 2 | 3 | 4 | 5 | 6 | 7 | 8 | 9 | 10 | LoE |
|--------------------------------|---|---|---|---|---|---|---|---|---|----|-----|
| SLE                            |   |   |   |   |   |   |   |   |   |    |     |
| Stege, 2000 [1]                | Y | / | / | N | Y | Y | / | U | / | R  | 4   |
| Sohng, 2003 [2]                | Y | N | Y | Y | U | U | Y | U | Y | I  | 3   |
| Ward, 2003 [3]                 | Y | / | / | N | U | N | / | Y | Y | I  | 4   |
| Carvalho, 2005 [4]             | Y | / | / | N | U | N | / | Y | Y | I  | 4   |
| Clarke-Jenssen, 2005 [5]       | Y | / | / | N | Y | Y | / | Y | Y | R  | 4   |
| Goodman, 2005 [6]              | Y | N | Y | Y | Y | N | N | Y | Y | I  | 3   |
| Harrison, 2005 [7]             | Y | / | / | N | U | Y | / | U | Y | I  | 4   |
| Haupt, 2005 [8]                | Y | N | Y | Y | U | Y | U | U | Y | I  | 3   |
| Szegedi, 2005 [9]              | Y | / | / | N | U | Y | / | U | Y | I  | 4   |
| Ng, 2007 [10]                  | Y | Y | Y | Y | U | U | Y | Y | Y | R  | 3   |
| Erceg, 2009 [11]               | Y | / | / | N | Y | U | / | Y | Y | R  | 4   |
| Otto, 2011 [12]                | Y | / | / | N | U | N | U | U | U | W  | 5   |
| Yuen, 2011 [13]                | Y | / | / | N | U | Y | / | Y | Y | R  | 4   |
| Drenkard, 2012 [14]            | Y | / | / | N | U | Y | / | U | Y | I  | 4   |
| da Silva, 2013 [15]            | Y | N | N | Y | N | Y | Y | U | Y | I  | 3   |
| dos Reis-Neto, 2013 [16]       | Y | Y | Y | Y | U | N | Y | Y | Y | R  | 3   |
| Bantornwan, 2014 [17]          | Y | N | Y | Y | U | U | N | U | Y | I  | 3   |
| Jolly, 2014 [18]               | Y | N | Y | Y | U | U | Y | U | Y | I  | 3   |
| Perandini, 2014 [19]           | Y | N | N | Y | U | Y | Y | U | Y | I  | 3   |
| Zahn, 2014 [20]                | Y | N | N | Y | U | Y | Y | Y | Y | I  | 3   |
| Everett, 2015 [21]             | Y | Y | Y | N | N | Y | N | U | Y | I  | 4   |



| Reference/Questions* and LoE** | 1 | 2 | 3 | 4 | 5 | 6 | 7 | 8 | 9 | 10 | LoE |
|--------------------------------|---|---|---|---|---|---|---|---|---|----|-----|
| Perandini, 2015 [22]           | Y | N | N | Y | Y | U | Y | U | Y | I  | 3   |
| Perandini, 2016 [23]           | Y | N | N | Y | U | Y | Y | U | Y | I  | 3   |
| O'Riordan, 2017 [24]           | Y | / | / | N | U | N | / | U | Y | I  | 4   |
| Sahebalzamani, 2017 [25]       | Y | / | / | N | U | N | / | Y | Y | I  | 4   |
| Yelnik, 2017 [26]              | Y | / | / | N | U | Y | / | U | Y | I  | 4   |
| Kusnanto, 2018 [27]            | Y | / | / | N | U | U | / | Y | Y | I  | 4   |
| Soriano-Maldonado, 2018 [28]   | Y | Y | Y | Y | U | N | Y | U | Y | I  | 3   |
| Timoteo, 2018 [29]             | Y | Y | Y | Y | U | U | Y | Y | Y | R  | 3   |
| Williams, 2018 [30]            | Y | / | / | N | U | N | / | U | Y | I  | 4   |
| Kim, 2019 [31]                 | Y | / | / | N | U | U | / | Y | Y | I  | 4   |
| Rerknimitr, 2019 [32]          | Y | / | / | N | U | U | / | Y | Y | I  | 4   |
| Sahebari, 2019 [33]            | Y | U | Y | Y | U | U | Y | Y | Y | I  | 3   |
| Sheikh, 2019 [34]              | Y | / | / | N | U | Y | / | N | Y | I  | 4   |
| Williams, 2019 [35]            | Y | / | / | N | U | N | / | Y | Y | I  | 4   |
| Abdelaziz, 2020 [36]           | Y | Y | Y | Y | U | Y | Y | Y | Y | R  | 3   |
| Gavilan-Carrera, 2020 [37]     | Y | N | Y | Y | U | N | Y | Y | Y | I  | 3   |
| Kao, 2021 [38]                 | Y | Y | U | Y | U | N | Y | U | Y | I  | 3   |
| <b>S5c</b>                     |   |   |   |   |   |   |   |   |   |    |     |
| Samuelson, 2000 [39]           | Y | / | / | N | U | Y | / | Y | N | I  | 4   |
| Pizzo, 2003 [40]               | Y | / | / | N | U | Y | / | Y | Y | R  | 4   |
| Sandqvist, 2004 [41]           | Y | / | / | N | U | N | / | U | Y | I  | 4   |
| Foerster, 2005 [42]            | Y | / | / | N | U | U | / | U | U | I  | 4   |
| Mugii, 2006 [43]               | Y | N | N | Y | U | Y | N | Y | Y | I  | 3   |
| Sallam, 2007 [44]              | Y | N | N | Y | U | U | N | U | Y | W  | 4   |
| Antonoli, 2009 [45]            | Y | Y | Y | Y | U | Y | Y | Y | Y | R  | 3   |
| Oliveira, 2009 [46]            | Y | N | N | Y | U | U | Y | U | Y | I  | 3   |
| Poole, 2010 [47]               | Y | / | / | N | U | Y | / | U | Y | I  | 4   |
| Frech, 2011 [48]               | Y | / | / | N | N | U | / | Y | Y | I  | 4   |
| Kwakkenbos, 2011 [49]          | Y | / | / | N | U | Y | / | Y | Y | R  | 4   |
| Pinto, 2011 [50]               | Y | / | / | N | U | Y | / | Y | Y | R  | 4   |
| Tinazzi, 2011 [51]             | Y | / | / | N | U | N | / | U | Y | I  | 4   |
| Murray, 2012 [52]              | Y | / | / | N | U | Y | / | Y | Y | R  | 4   |
| Belloli, 2013 [53]             | Y | / | / | N | U | U | / | U | U | I  | 4   |
| McNearney, 2013 [54]           | Y | / | / | N | U | U | / | U | Y | I  | 4   |
| Poole, 2013 [55]               | Y | / | / | N | U | Y | / | U | Y | I  | 4   |
| Dinsdale, 2014 [56]            | Y | / | / | N | U | N | / | Y | Y | I  | 4   |
| Ortiz-Santamaria, 2014 [57]    | Y | / | / | N | U | N | / | U | Y | I  | 4   |
| Poole, 2014 [58]               | Y | / | / | N | U | Y | / | Y | Y | R  | 4   |
| Saito, 2016 [59]               | Y | Y | Y | Y | U | U | U | U | U | I  | 3   |
| Saito, 2016 [60]               | Y | / | / | N | U | Y | / | U | Y | I  | 4   |
| Doerfler, 2017 [61]            | Y | / | / | N | U | Y | / | U | Y | I  | 4   |

| Reference/Questions* and LoE** | 1 | 2 | 3 | 4 | 5 | 6 | 7 | 8 | 9 | 10 | LoE |
|--------------------------------|---|---|---|---|---|---|---|---|---|----|-----|
| Horváth, 2017 [62]             | Y | Y | Y | Y | N | U | Y | Y | Y | R  | 3   |
| Parisi, 2017 [63]              | Y | / | / | N | U | U | / | U | Y | I  | 4   |
| Rosholm Comstedt, 2017 [64]    | Y | / | / | N | U | N | / | Y | Y | I  | 4   |
| Zanatta, 2017 [65]             | Y | Y | Y | Y | U | Y | Y | Y | Y | R  | 3   |
| Brignoli, 2018 [66]            | Y | / | / | N | Y | U | / | Y | Y | R  | 4   |
| Fiori, 2018 [67]               | Y | U | Y | Y | U | U | Y | Y | Y | I  | 3   |
| Murphy, 2018 [68]              | Y | / | / | N | N | Y | / | Y | Y | R  | 4   |
| Frech, 2019 [69]               | Y | / | / | N | U | Y | / | U | / | I  | 4   |
| Hughes, 2019 [70]              | Y | / | / | N | U | Y | / | Y | Y | R  | 4   |
| Landim, 2019 [71]              | Y | / | / | N | N | Y | / | Y | Y | R  | 4   |
| Nowicka, 2019 [72]             | Y | / | / | N | U | Y | / | U | Y | I  | 4   |
| Thombs, 2019 [73]              | Y | / | / | N | U | Y | / | Y | Y | R  | 4   |
| Landim, 2020 [74]              | Y | N | Y | Y | U | N | Y | Y | Y | I  | 3   |
| Defi, 2021 [75]                | Y | / | / | N | U | U | / | U | U | I  | 4   |

**\*Questions (according to the Joanna Briggs Institute critical appraisal tools [76]):**

1. Is it clear in the study what is the 'cause' and what is the 'effect' (i.e., there is no confusion about which variable comes first)?
2. Were the participants included in any comparisons similar?
3. Were the participants included in any comparisons receiving similar treatment/care, other than the exposure or intervention of interest?
4. Was there a control group?
5. Were there multiple measurements of the outcome both pre and post the intervention/exposure?
6. Was follow up complete and if not, were differences between groups in terms of their follow up adequately described and analysed?
7. Were the outcomes of participants included in any comparisons measured in the same way?
8. Were outcomes measured in a reliable way?
9. Was appropriate statistical analysis used?
10. Overall appraisal?

**\*\*LoE: Levels of evidence according to the Oxford Centre for Evidence-Based Medicine [77]**

| Cell | Interpretation       |
|------|----------------------|
| Y/R  | Yes/robust           |
| N/W  | No/weak              |
| U/I  | Unclear/intermediate |
| /    | Not applicable       |

**References:**

1. Stege H, Budde MA, Grether-Beck S, Krutmann J. Evaluation of the capacity of sunscreens to photoprotect lupus erythematosus patients by employing the photoprovocation test. *Photodermatology, Photoimmunology & Photomedicine*. 2000 2000; 16(6):256-259.
2. Sohng KY. Effects of a self-management course for patients with systemic lupus erythematosus. *Journal of Advanced Nursing*. 2003 2003; 42(5):479-486.
3. Ward MM, Sundaramurthy S, Lotstein D, Bush TM, Neuwelt CM, Street RL, Jr. Participatory patient-physician communication and morbidity in patients with systemic lupus erythematosus. *Arthritis Rheum*. 2003 Dec 15; 49(6):810-818.
4. Carvalho MR, Sato EI, Tebexreni AS, Heidecher RT, Schenkman S, Neto TL. Effects of supervised cardiovascular training program on exercise tolerance, aerobic capacity, and quality of life in patients with systemic lupus erythematosus. *Arthritis & Rheumatism*. 2005 2005; 53(6):838-844.
5. Clarke-Jenssen AC, Fredriksen PM, Lilleby V, Mengshoel AM. Effects of supervised aerobic exercise in patients with systemic lupus erythematosus: a pilot study. *Arthritis & Rheumatism*. 2005 2005; 53(2):308-312.

6. Goodman D, Morrissey S, Graham D, Bossingham D. The application of cognitive-behaviour therapy in altering illness representations of systemic lupus erythematosus. *Behaviour Change*. 2005 2005; 22(3):156-171.
7. Harrison MJ, Morris KA, Horton R, Toglia J, Barsky J, Chait S, et al. Results of intervention for lupus patients with self-perceived cognitive difficulties. *Neurology*. 2005 2005; 65(8):1325-1327.
8. Haupt M, Millen S, Janner M, Falagan D, Fischer-Betz R, Schneider M. Improvement of coping abilities in patients with systemic lupus erythematosus: a prospective study. *Annals of the Rheumatic Diseases*. 2005 2005; 64(11):1618-1623.
9. Szegedi A, Simics E, Aleksza M, Horkay I, Gaal K, Sipka S, et al. Ultraviolet-A1 phototherapy modulates Th1/Th2 and Tc1/Tc2 balance in patients with systemic lupus erythematosus. *Rheumatology*. 2005 2005; 44(7):925-931.
10. Ng P, Chan W. Group psychosocial program for enhancing psychological well-being of people with systemic lupus erythematosus. *Journal of Social Work in Disability & Rehabilitation*. 2007 2007; 6(3):75-87.
11. Erceg A, Bovenschen HJ, van de Kerkhof PC, de Jong EM, Seyger MM. Efficacy and safety of pulsed dye laser treatment for cutaneous discoid lupus erythematosus. *Journal of the American Academy of Dermatology*. 2009 2009; 60(4):626-632.
12. Otto AD, Mishler AE, Shah N, Krug MM, Phillips A, Wilson N, et al. Feasibility of Implementing a Lifestyle Intervention in Overweight and Obese Patients with Systemic Lupus Erythematosus. *Medicine & Science in Sports & Exercise*. 2011 2011; 43:123-123.
13. Yuen HK, Holthaus K, Kamen DL, Sword DO, Breland HL. Using Wii Fit to reduce fatigue among African American women with systemic lupus erythematosus: a pilot study. *Lupus*. 2011 2011; 20(12):1293-1299.
14. Drenkard C, Dunlop-Thomas C, Easley K, Bao G, Brady T, Lim SS. Benefits of a self-management program in low-income African-American women with systemic lupus erythematosus: results of a pilot test. *Lupus*. 2012 2012; 21(14):1586-1593.
15. da Silva AE, dos Reis-Neto ET, da Silva NP, Sato EI. The effect of acute physical exercise on cytokine levels in patients with systemic lupus erythematosus. *Lupus*. 2013 2013; 22(14):1479-1483.
16. dos Reis-Neto ET, da Silva AE, Monteiro CM, de Camargo LM, Sato EI. Supervised physical exercise improves endothelial function in patients with systemic lupus erythematosus. *Rheumatology*. 2013 2013; 52(12):2187-2195.
17. Bantornwan S, Watanapa WB, Hussarin P, Chatsiricharoenkul S, Larpparisuth N, Teerapornlertratt T, et al. Role of meditation in reducing sympathetic hyperactivity and improving quality of life in lupus nephritis patients with chronic kidney disease. *Journal of the Medical Association of Thailand*. 2014 2014; 97:S101-107.
18. Jolly M, Peters KF, Mikolaitis R, Evans-Raoul K, Block JA. Body image intervention to improve health outcomes in lupus: a pilot study. *JCR: Journal of Clinical Rheumatology*. 2014 2014; 20(8):403-410.
19. Perandini LA, Sales-de-Oliveira D, Mello SB, Camara NO, Benatti FB, Lima FR, et al. Exercise training can attenuate the inflammatory milieu in women with systemic lupus erythematosus. *Journal of Applied Physiology*. 2014 2014; 117(6):639-647.
20. Zahn S, Graef M, Patsinakidis N, Landmann A, Surber C, Wenzel J, et al. Ultraviolet light protection by a sunscreen prevents interferon-driven skin inflammation in cutaneous lupus erythematosus. *Experimental Dermatology*. 2014 2014; 23(7):516-518.
21. Everett ST, Wolf R, Contento I, Haiduc V, Richey M, Erkan D. Short-term patient-centered nutrition counseling impacts weight and nutrient intake in patients with systemic lupus erythematosus. *Lupus*. 2015 2015; 24(12):1321-1326.
22. Perandini LA, Sales-de-Oliveira D, Mello S, Camara NO, Benatti FB, Lima FR, et al. Inflammatory cytokine kinetics to single bouts of acute moderate and intense aerobic exercise in women with active and inactive systemic lupus erythematosus. *Exercise Immunology Review*. 2015 2015; 21:174-185.
23. Perandini LA, Sales-de-Oliveira D, Almeida DC, Azevedo H, Moreira-Filho CA, Cenedeze MA, et al. Effects of acute aerobic exercise on leukocyte inflammatory gene expression in systemic lupus erythematosus. *Exercise Immunology Review*. 2016 2016; 22:64-81.
24. O'Riordan R, Doran M, Connolly D. Fatigue and Activity Management Education for Individuals with Systemic Lupus Erythematosus. *Occupational Therapy International*. 2017 2017; 2017:4530104.
25. Sahebalzamani M, Farahani H, Jamarani MT, Faezi ST, Moradi K, Paragomi P. Effects of a Continuous Care Model on Patients' Knowledge and Health-Related Quality of Life in Systemic Lupus Erythematosus. *Rehabilitation Nursing Journal*. 2017 2017; 42(6):E9-E18.
26. Yelnik CM, Richey M, Haiduc V, Everett S, Zhang M, Erkan D. Cardiovascular Disease Prevention Counseling Program for Systemic Lupus Erythematosus Patients. *Arthritis care & research*. 2017 2017; 69(8):1209-1216.
27. Kusananto K, Sari N, Harmayetti H, Efendi F, Gunawan J. Self-care model application to improve self-care agency, self-care activities, and quality of life in patients with systemic lupus erythematosus. *Journal of Taibah University Medical Sciences*. 2018 2018; 13(5):472-478.
28. Soriano-Maldonado A, Morillas-de-Laguno P, Sabio JM, Gavilan-Carrera B, Rosales-Castillo A, Montalban-Mendez C, et al. Effects of 12-week Aerobic Exercise on Arterial Stiffness, Inflammation, and Cardiorespiratory Fitness in Women with Systemic LUPUS Erythematosus: Non-Randomized Controlled Trial. *Journal of Clinical Medicine*. 2018 2018; 7(12):24.
29. Timoteo RP, Silva AF, Micheli DC, Candido Murta EF, Freire M, Teodoro RB, et al. Increased flexibility, pain reduction and unaltered levels of IL-10 and CD11b + lymphocytes in patients with systemic lupus erythematosus were associated with kinesiotherapy. *Lupus*. 2018 2018; 27(7):1159-1168.
30. Williams EM, Hyer JM, Viswanathan R, Faith TD, Voronca D, Gebregziabher M, et al. Peer-to-Peer Mentoring for African American Women With Lupus: A Feasibility Pilot. *Arthritis care & research*. 2018 2018; 70(6):908-917.
31. Kim HA, Seo L, Jung JY, Kim YW, Lee E, Cho SM, et al. Mindfulness-based cognitive therapy in Korean patients with systemic lupus erythematosus: A pilot study. *Complementary Therapies in Clinical Practice*. 2019 2019; 35:18-21.
32. Rerknimitr P, Tekacharin N, Panchaprateep R, Witsuwannakul J, Tangtanatakul P, Hirankarn N, et al. Pulsed-dye laser as an adjuvant treatment for discoid lupus erythematosus: a randomized, controlled trial. *Journal of Dermatological Treatment*. 2019 2019; 30(1):81-86.
33. Sahebari M, Asghari Ebrahimabad MJ, Ahmadi Shoraketokanlo A, Aghamohammadian Sharbaf H, Khodashahi M. Efficacy of Acceptance and Commitment Therapy in Reducing Disappointment, Psychological Distress, and Psychasthenia among Systemic Lupus Erythematosus (SLE) Patients. *Iranian Journal of Psychiatry*. 2019 2019; 14(2):130-136.
34. Sheikh SZ, Kaufman K, Gordon BB, Hicks S, Love A, Walker J, et al. Evaluation of the self-directed format of Walk With Ease in patients with systemic lupus erythematosus: the Walk-SLE Pilot Study. *Lupus*. 2019 2019; 28(6):764-770.
35. Williams EM, Dismuke CL, Faith TD, Smalls BL, Brown E, Oates JC, et al. Cost-effectiveness of a peer mentoring intervention to improve disease self-management practices and self-efficacy among African American women with systemic lupus erythematosus: analysis of the Peer Approaches to Lupus Self-management (PALS) pilot study. *Lupus*. 2019 2019; 28(8):937-944.
36. Abdelaziz SH, Elmetwaly OIA, Maged LA. Effect of using warm shower and warm water footbath with and without adding epsom salt on fatigue level in systemic lupus patients. *Indian Journal of Public Health Research and Development*. 2020 2020; 11(5):854-859.
37. Gavilan-Carrera B, Vargas-Hitos JA, Morillas-de-Laguno P, Rosales-Castillo A, Sola-Rodriguez S, Callejas-Rubio JL, et al. Effects of 12-week aerobic exercise on patient-reported outcomes in women with systemic lupus erythematosus. *Disability & Rehabilitation*. 2020 2020:1-9.
38. Kao VP, Wen HJ, Pan YJ, Pai CS, Tsai ST, Su KY. Combined aerobic and resistance training improves physical and executive functions in women with systemic lupus erythematosus. *Lupus*. 2021 2021; 30(6):946-955.

39. Samuelson UK, Ahlmen EM. Development and evaluation of a patient education program for persons with systemic sclerosis (scleroderma). *Arthritis Care & Research*. 2000 2000; 13(3):141-148.
40. Pizzo G, Scardina GA, Messina P. Effects of a nonsurgical exercise program on the decreased mouth opening in patients with systemic scleroderma. *Clinical Oral Investigations*. 2003 2003; 7(3):175-178.
41. Sandqvist G, Akesson A, Eklund M. Evaluation of paraffin bath treatment in patients with systemic sclerosis. *Disability & Rehabilitation*. 2004 2004; 26(16):981-987.
42. Foerster J, Fleischanderl S, Wittstock S, Storch A, Meffert H, Riemekasten G, et al. Infrared-mediated hyperthermia is effective in the treatment of scleroderma-associated Raynaud's phenomenon. *Journal of Investigative Dermatology*. 2005 2005; 125(6):1313-1316.
43. Mugii N, Hasegawa M, Matsushita T, Kondo M, Orito H, Yanaba K, et al. The efficacy of self-administered stretching for finger joint motion in Japanese patients with systemic sclerosis. *Journal of Rheumatology*. 2006 2006; 33(8):1586-1592.
44. Sallam H, McNearney TA, Doshi D, Chen JD. Transcutaneous electrical nerve stimulation (TENS) improves upper GI symptoms and balances the sympathovagal activity in scleroderma patients. *Dig Dis Sci*. 2007 May; 52(5):1329-1337.
45. Antonioli CM, Bua G, Frige A, Prandini K, Radici S, Scarsi M, et al. An individualized rehabilitation program in patients with systemic sclerosis may improve quality of life and hand mobility. *Clinical Rheumatology*. 2009 2009; 28(2):159-165.
46. Oliveira NC, dos Santos Sabbag LM, de Sá Pinto AL, Borges CL, Lima FR. Aerobic exercise is safe and effective in systemic sclerosis. *Int J Sports Med*. 2009 Oct; 30(10):728-732.
47. Poole J, Conte C, Brewer C, Good CC, Perella D, Rossie KM, et al. Oral hygiene in scleroderma: The effectiveness of a multi-disciplinary intervention program. *Disability & Rehabilitation*. 2010 2010; 32(5):379-384.
48. Frech TM, Khanna D, Maranian P, Frech EJ, Sawitzke AD, Murtaugh MA. Probiotics for the treatment of systemic sclerosis-associated gastrointestinal bloating/distention. *Clin Exp Rheumatol*. 2011 Mar-Apr; 29(2 Suppl 65):S22-25.
49. Kwakkenbos L, Bluyssen SJ, Vonk MC, van Helmond AF, van den Ende CH, van den Hoogen FH, et al. Addressing patient health care demands in systemic sclerosis: pre-post assessment of a psycho-educational group programme. *Clin Exp Rheumatol*. 2011 Mar-Apr; 29(2 Suppl 65):S60-65.
50. Pinto AL, Oliveira NC, Gualano B, Christmann RB, Painelli VS, Artioli GG, et al. Efficacy and safety of concurrent training in systemic sclerosis. *Journal of Strength & Conditioning Research*. 2011 2011; 25(5):1423-1428.
51. Tinazzi E, Amelio E, Marangoni E, Guerra C, Puccetti A, Codella OM, et al. Effects of shock wave therapy in the skin of patients with progressive systemic sclerosis: a pilot study. *Rheumatology International*. 2011 2011; 31(5):651-656.
52. Murray AK, Moore TL, Richards H, Ennis H, Griffiths CE, Herrick AL. Pilot study of intense pulsed light for the treatment of systemic sclerosis-related telangiectases. *British Journal of Dermatology*. 2012 2012; 167(3):563-569.
53. Belloli L, Cugno M, D'Agostino MC, Ughi N, Tedeschi A, Respizzi S, et al. Shock wave therapy for systemic sclerosis. *Rheumatol Int*. 2013 Apr; 33(4):1099-1100.
54. McNearney TA, Sallam HS, Hunnicutt SE, Doshi D, Chen JD. Prolonged treatment with transcutaneous electrical nerve stimulation (TENS) modulates neuro-gastric motility and plasma levels of vasoactive intestinal peptide (VIP), motilin and interleukin-6 (IL-6) in systemic sclerosis. *Clin Exp Rheumatol*. 2013 Mar-Apr; 31(2 Suppl 76):140-150.
55. Poole JL, Skipper B, Mendelson C. Evaluation of a mail-delivered, print-format, self-management program for persons with systemic sclerosis. *Clinical Rheumatology*. 2013 2013; 32(9):1393-1398.
56. Dinsdale G, Murray A, Moore T, Ferguson J, Wilkinson J, Richards H, et al. A comparison of intense pulsed light and laser treatment of telangiectases in patients with systemic sclerosis: a within-subject randomized trial. *Rheumatology*. 2014 2014; 53(8):1422-1430.
57. Ortiz-Santamaria V, Puig C, Soldevilla C, Barata A, Cuquet J, Recasens A. Nutritional support in patients with systemic sclerosis. *Reumatologia Clinica*. 2014 2014; 10(5):283-287.
58. Poole JL, Mendelson C, Skipper B, Khanna D. Taking charge of systemic sclerosis: a pilot study to assess the effectiveness of an internet self-management program. *Arthritis care & research*. 2014 2014; 66(5):778-782.
59. Saito S, Ishii T, Ito K, Shimokawa H. Extracorporeal shock wave therapy for digital ulcers associated with systemic sclerosis. *Journal of Scleroderma and Related Disorders*. 2016 2016; 1(2):181-185.
60. Saito S, Ishii T, Kamogawa Y, Watanabe R, Shirai T, Fujita Y, et al. Extracorporeal Shock Wave Therapy for Digital Ulcers of Systemic Sclerosis: A Phase 2 Pilot Study. *Tohoku Journal of Experimental Medicine*. 2016 2016; 238(1):39-47.
61. Doerfler B, Allen TS, Southwood C, Brenner D, Hirano I, Sheehan P. Medical Nutrition Therapy for Patients With Advanced Systemic Sclerosis (MNT PASS): A Pilot Intervention Study. *Jpen: Journal of Parenteral & Enteral Nutrition*. 2017 2017; 41(4):678-684.
62. Horváth J, Bálint Z, Szép E, Deiszinger A, Minier T, Farkas N, et al. Efficacy of intensive hand physical therapy in patients with systemic sclerosis. *Clin Exp Rheumatol*. 2017 Sep-Oct; 35 Suppl 106(4):159-166.
63. Parisi S, Celletti C, Scarati M, Priora M, Laganà A, Peroni CL, et al. Neuromuscular taping enhances hand function in patients with systemic sclerosis: a pilot study. *Clin Ter*. 2017 Nov-Dec; 168(6):e371-e375.
64. Rosholm Comstedt L, Svensson A, Hesselstrand R, Lehti L, Troilius Rubin A. Effects of intense pulsed light in microstomia in patients with systemic sclerosis: A pilot study. *Journal of Cosmetic & Laser Therapy*. 2017 2017; 19(3):143-148.
65. Zanatta E, Rodeghiero F, Pigatto E, Galozzi P, Polito P, Favaro M, et al. Long-term improvement in activities of daily living in women with systemic sclerosis attending occupational therapy. *British Journal of Occupational Therapy*. 2017 2017; 80(7):417-422.
66. Brignoli E, Frassanito P, Vercesi E, Ferretti C, Felicetti G, Maestri R, et al. Rehabilitation in systemic sclerosis: proposed personalised rehabilitation programme. *G Ital Med Lav Ergon*. 2018 Dec; 40(4):248-256.
67. Fiori G, Marzi T, Bartoli F, Bruni C, Ciceroni C, Palomba M, et al. The challenge of pet therapy in systemic sclerosis: evidence for an impact on pain, anxiety, neuroticism and social interaction. *Clin Exp Rheumatol*. 2018 Jul-Aug; 36 Suppl 113(4):135-141.
68. Murphy SL, Barber MW, Homer K, Dodge C, Cutter GR, Khanna D. Occupational Therapy Treatment to Improve Upper Extremity Function in Individuals with Early Systemic Sclerosis: A Pilot Study. *Arthritis care & research*. 2018 2018; 70(11):1653-1660.
69. Frech TM, McNeill C, Lebiedz-Odrobina D, Lewis G. Amniotic membrane dressings: an effective therapy for SSC-related wounds. *Rheumatology (Oxford)*; 2019:734-736.
70. Hughes M, Moore T, Manning J, Wilkinson J, Watson S, Samraj P, et al. A feasibility study of a novel low-level light therapy for digital ulcers in systemic sclerosis. *Journal of Dermatological Treatment*. 2019 2019; 30(3):251-257.
71. Landim SF, Bertolo MB, Marcatto de Abreu MF, Del Rio AP, Mazon CC, Marques-Neto JF, et al. The evaluation of a home-based program for hands in patients with systemic sclerosis. *Journal of Hand Therapy*. 2019 2019; 32(3):313-321.
72. Nowicka D. Positive effect of ozonotherapy on serum concentration of soluble interleukin-2 receptor and neopterin in patients with systemic sclerosis. *Postepy Dermatol Alergol*. 2019 Apr; 36(2):158-163.

73. Thombs BD, Dyas L, Pepin M, Aguila K, Carrier ME, Tao L, et al. Scleroderma Patient-centered Intervention Network-Scleroderma Support group Leader Education (SPIN-SSLED) program: non-randomised feasibility trial. *BMJ Open*. 2019 2019; 9(11):e029935.
74. S FL, M BB, Del Rio AP, Sachetto Z, Zonzini Gaino J, J LP, et al. Sustained efficacy of a concise self-management programme for hands in systemic sclerosis: a longitudinal case-control observational study. *Rheumatology*. 2020 2020; 59(11):3330-3339.
75. Defi IR, Gultom C, Chorman MJ, Jennie J. High-intensity interval training can improve hand grip strength, inspiratory muscle, and quality of life in systemic sclerosis subjects. *Reumatologia*. 2021 2021; 59(2):98-103.
76. Tufanaru C, Munn Z, Aromataris E, Campbell J, Hopp L, (Editors). Chapter 3: Systematic reviews of effectiveness. *JBIC* 2020 [cited 2022 28 Feb]; Available from: <https://synthesismanual.jbi.global>
77. Howick J, Chalmers I, Glasziou P, Greenhalgh T, Heneghan C, Liberati, et al. *The Oxford Levels of Evidence 2*. 2011 [cited; Available from: <https://www.cebm.ox.ac.uk/resources/levels-of-evidence/ocebml-levels-of-evidence>

## Supplemental Table S6

### CRITICAL APPRAISAL OF ANALYTICAL CROSS-SECTIONAL STUDIES (STUDY TYPE 1; N = 17)

| Reference/Questions* and LoE** | 1 | 2 | 3 | 4 | 5 | 6 | 7 | 8 | 9 | LoE |
|--------------------------------|---|---|---|---|---|---|---|---|---|-----|
| <b>SLE</b>                     |   |   |   |   |   |   |   |   |   |     |
| Dorsey, 2004 [1]               | Y | N | / | Y | Y | Y | U | Y | R | 3   |
| Alvarez-Nemegyei, 2009 [2]     | Y | Y | / | Y | Y | Y | Y | Y | R | 3   |
| Aghdassi, 2010 [3]             | Y | Y | / | Y | U | N | Y | U | I | 3   |
| do Prado, 2011 [4]             | Y | Y | / | Y | U | N | Y | Y | R | 3   |
| Elkan, 2012 [5]                | Y | Y | / | Y | U | N | U | Y | I | 3   |
| Barnes, 2014 [6]               | N | Y | / | Y | U | N | Y | Y | I | 3   |
| Xu, 2015 [7]                   | Y | Y | U | Y | Y | Y | U | Y | R | 3   |
| Arat, 2017 [8]                 | Y | Y | / | U | U | U | Y | Y | I | 3   |
| Abdul Kadir, 2018 [9]          | Y | Y | / | Y | U | N | U | U | I | 3   |
| Morgan, 2018 [10]              | N | N | / | U | U | U | Y | Y | I | 3   |
| Li, 2019 [11]                  | Y | Y | / | Y | Y | Y | U | Y | R | 3   |
| Pocovi-Gerardino, 2021 [12]    | Y | Y | Y | Y | Y | Y | U | Y | R | 3   |
| <b>SSc</b>                     |   |   |   |   |   |   |   |   |   |     |
| Rubenzik, 2009 [13]            | Y | Y | / | U | U | U | U | Y | I | 3   |
| Schouffoer, 2011 [14]          | Y | Y | / | Y | U | U | N | Y | I | 3   |
| Lima, 2015 [15]                | Y | Y | Y | Y | U | Y | U | Y | R | 3   |
| Arat, 2017 [8]                 | Y | Y | / | U | U | U | Y | Y | I | 3   |
| Delisle, 2019 [16]             | N | N | / | U | U | U | N | Y | W | 4   |
| Stöcker, 2021 [17]             | N | N | Y | N | U | U | N | Y | W | 4   |

**\*Questions (according to the Joanna Briggs Institute critical appraisal tools [18]):**

1. Were the criteria for inclusion in the sample clearly defined?
2. Were the study subjects and the setting described in detail?
3. Was the exposure measured in a valid and reliable way?
4. Were objective, standard criteria used for measurement of the condition?

5. Were confounding factors identified?
6. Were strategies to deal with confounding factors stated?
7. Were the outcomes measured in a valid and reliable way?
8. Was appropriate statistical analysis used?
9. Overall appraisal?

**\*\*LoE: Levels of evidence according to the Oxford Centre for Evidence-Based Medicine [19]**

| Cell | Interpretation       |
|------|----------------------|
| Y/R  | Yes/robust           |
| N/W  | No/weak              |
| U/I  | Unclear/intermediate |
| /    | Not applicable       |

#### References:

1. Dorsey RR, Andresen EM, Moore TL. Health-related quality of life and support group attendance for patients with systemic lupus erythematosus. *JCR: Journal of Clinical Rheumatology*. 2004 2004; 10(1):6-9.
2. Alvarez-Nemegyei J, Bautista-Botello A, Davila-Velazquez J. Association of complementary or alternative medicine use with quality of life, functional status or cumulated damage in chronic rheumatic diseases. *Clinical Rheumatology*. 2009 2009; 28(5):547-551.
3. Aghdassi E, Morrison S, Landolt-Marticorena C, Su J, Pineau CA, Gladman D, et al. The use of micronutrient supplements is not associated with better quality of life and disease activity in Canadian patients with systemic lupus erythematosus. *J Rheumatol*. 2010 Jan; 37(1):87-90.
4. do Prado DM, Gualano B, Miozzi R, Lima FR, Roschel H, Borba E, et al. Erratic control of breathing during exercise in patients with systemic lupus erythematosus: a pilot-study. *Lupus*. 2011 2011; 20(14):1535-1540.
5. Elkan AC, Anania C, Gustafsson T, Jogestrand T, Hafstrom I, Frostegard J. Diet and fatty acid pattern among patients with SLE: associations with disease activity, blood lipids and atherosclerosis. *Lupus*. 2012 2012; 21(13):1405-1411.
6. Barnes JN, Nualnim N, Dhindsa M, Renzi CP, Tanaka H. Macro- and microvascular function in habitually exercising systemic lupus erythematosus patients. *Scandinavian Journal of Rheumatology*. 2014 2014; 43(3):209-216.
7. Xu D, You X, Wang Z, Zeng Q, Xu J, Jiang L, et al. Chinese Systemic Lupus Erythematosus Treatment and Research Group Registry VI: Effect of Cigarette Smoking on the Clinical Phenotype of Chinese Patients with Systemic Lupus Erythematosus. *PLoS ONE [Electronic Resource]*. 2015 2015; 10(8):e0134451.
8. Arat S, Lenaerts JL, De Langhe E, Verschuere P, Moons P, Vandenbergh J, et al. Illness representations of systemic lupus erythematosus and systemic sclerosis: a comparison of patients, their rheumatologists and their general practitioners. *Lupus Sci Med*. 2017; 4(1):e000232.
9. Abdul Kadir WD, Jamil A, Shaharir SS, Md Nor N, Abdul Gafor AH. Photoprotection awareness and practices among patients with systemic lupus erythematosus and its association with disease activity and severity. *Lupus*. 2018 2018; 27(8):1287-1295.
10. Morgan C, Bland AR, Maker C, Dunnage J, Bruce IN. Individuals living with lupus: findings from the LUPUS UK Members Survey 2014. *Lupus*. 2018 Apr; 27(4):681-687.
11. Li X, He L, Wang J, Wang M. Illness uncertainty, social support, and coping mode in hospitalized patients with systemic lupus erythematosus in a hospital in Shaanxi, China. *PLoS ONE [Electronic Resource]*. 2019 2019; 14(2):e0211313.
12. Pocovi-Gerardino G, Correa-Rodriguez M, Callejas-Rubio JL, Rios-Fernandez R, Martin-Amada M, Cruz-Caparrros MG, et al. Beneficial effect of Mediterranean diet on disease activity and cardiovascular risk in systemic lupus erythematosus patients: a cross-sectional study. *Rheumatology*. 2021 2021; 60(1):160-169.
13. Rubenzik TT, Derk CT. Unmet patient needs in systemic sclerosis. *J Clin Rheumatol*. 2009 Apr; 15(3):106-110.
14. Schouffoer AA, Zirkzee EJ, Henquet SM, Caljouw MA, Steup-Beekman GM, van Laar JM, et al. Needs and preferences regarding health care delivery as perceived by patients with systemic sclerosis. *Clin Rheumatol*. 2011 Jun; 30(6):815-824.
15. Lima TR, Guimaraes FS, Carvalho MN, Sousa TL, Menezes SL, Lopes AJ. Lower limb muscle strength is associated with functional performance and quality of life in patients with systemic sclerosis. *Brazilian Journal of Physical Therapy*. 2015 2015; 19(2):129-136.
16. Delisle VC, Gumuchian ST, El-Baalbaki G, Körner A, Malcarne VL, Peláez S, et al. Training and support needs of scleroderma support group facilitators: the North American Scleroderma Support Group Facilitators Survey. *Disabil Rehabil*. 2019 Oct; 41(20):2477-2482.
17. Stöcker JK, Vonk MC, van den Hoogen FHJ, Nijhuis-van der Sanden MWG, Spierings J, Staal JB, et al. Opening the black box of non-pharmacological care in systemic sclerosis: a cross-sectional online survey of Dutch health professionals. *Rheumatol Int*. 2021 Jul; 41(7):1299-1310.
18. Moola S, Munn Z, Tufanaru C, Aromataris E, Sears K, Sfetcu R, et al. Chapter 7: Systematic reviews of etiology and risk. 2020 [cited 2022 28 Feb]; Available from: <https://synthesismanual.jbi.global>
19. Howick J, Chalmers I, Glasziou P, Greenhalgh T, Heneghan C, Liberati, et al. The Oxford Levels of Evidence 2. 2011 [cited; Available from: <https://www.cebm.ox.ac.uk/resources/levels-of-evidence/ocebml-levels-of-evidence>

## Supplemental Table S7

### CRITICAL APPRAISAL OF QUALITATIVE STUDIES (STUDY TYPE 9; N = 16)

| Reference/Questions* and LoE** | 1 | 2 | 3 | 4 | 5 | 6 | 7 | 8 | 9 | 10 | 11 | LoE |
|--------------------------------|---|---|---|---|---|---|---|---|---|----|----|-----|
| <b>SLE</b>                     |   |   |   |   |   |   |   |   |   |    |    |     |
| Brown, 2004 [1]                | / | Y | Y | Y | Y | N | N | Y | Y | Y  | R  | 4   |
| Miljeteig, 2009 [2]            | Y | Y | Y | Y | Y | N | N | Y | Y | Y  | R  | 4   |
| Feldman, 2013 [3]              | / | Y | Y | Y | Y | N | N | Y | Y | Y  | R  | 4   |
| Terrell, 2015 [4]              | Y | U | U | U | U | N | N | U | U | Y  | W  | 5   |
| Brennan, 2016 [5]              | / | Y | Y | Y | Y | N | N | Y | Y | Y  | R  | 4   |
| Middleton, 2018 [6]            | U | U | U | U | U | N | N | Y | Y | Y  | W  | 5   |
| Leung, 2019 [7]                | / | Y | Y | Y | Y | N | N | Y | Y | Y  | R  | 4   |
| Sloan, 2021 [8]                | / | Y | Y | Y | Y | N | N | Y | Y | Y  | R  | 4   |
| <b>SSc</b>                     |   |   |   |   |   |   |   |   |   |    |    |     |
| Joachim, 2003 [9]              | / | Y | Y | Y | Y | N | N | Y | U | Y  | I  | 4   |
| Brown, 2004 [1]                | / | Y | Y | Y | Y | N | N | Y | Y | Y  | R  | 4   |
| Willems, 2015 [10]             | / | Y | Y | Y | Y | N | N | Y | U | Y  | I  | 4   |
| Mouthon, 2017 [11]             | Y | Y | Y | Y | Y | N | N | Y | Y | Y  | R  | 4   |
| Gumuchian, 2018 [12]           | Y | Y | Y | Y | Y | N | N | Y | Y | Y  | R  | 4   |
| Millette, 2020 [13]            | / | Y | Y | Y | Y | N | N | Y | Y | Y  | R  | 4   |
| Pettersson, 2020 [14]          | / | Y | Y | Y | Y | N | N | Y | Y | Y  | R  | 4   |
| van Leeuwen, 2020 [15]         | / | Y | Y | Y | Y | N | N | Y | Y | Y  | R  | 4   |
| Harb, 2021 [16]                | / | Y | Y | Y | Y | N | N | Y | Y | Y  | R  | 4   |

**\*Questions (according to the Joanna Briggs Institute critical appraisal tools [17]):**

1. Is there congruity between the stated philosophical perspective and the research methodology?
2. Is there congruity between the research methodology and the research question or objectives?
3. Is there congruity between the research methodology and the methods used to collect data?
4. Is there congruity between the research methodology and the representation and analysis of data?
5. Is there congruity between the research methodology and the interpretation of results?
6. Is there a statement locating the researcher culturally or theoretically?
7. Is the influence of the researcher on the research, and vice-versa, addressed?
8. Are participants, and their voices, adequately represented?
9. Is the research ethical according to current criteria or, for recent studies, and is there evidence of ethical approval by an appropriate body?
10. Do the conclusions drawn in the research report flow from the analysis, or interpretation, of the data?
11. Overall appraisal?

**\*\*LoE: Levels of evidence according to the Oxford Centre for Evidence-Based Medicine [18]**

| Cell | Interpretation       |
|------|----------------------|
| Y/R  | Yes/robust           |
| N/W  | No/weak              |
| U/I  | Unclear/intermediate |
| /    | Not applicable       |



**References:**

1. Brown SJ, Somerset ME, McCabe CS, McHugh NJ. The impact of group education on participants' management of their disease in lupus and scleroderma. *Musculoskeletal Care*. 2004 2004; 2(4):207-217.
2. Miljeteig K, Graue M. Evaluation of a multidisciplinary patient education program for people with systemic lupus erythematosus. *Journal of Nursing & Healthcare of Chronic Illnesses*. 2009 2009; 1(1):87-95.
3. Feldman CH, Bermas BL, Zibit M, Fraser P, Todd DJ, Fortin PR, et al. Designing an intervention for women with systemic lupus erythematosus from medically underserved areas to improve care: a qualitative study. *Lupus*. 2013 Jan; 22(1):52-62.
4. Terrell DR, Stewart LM, Tolma EL, McClain R, Vesely SK, James JA. Barriers And Motivators for Smoking Cessation in Patients With Systemic Lupus Erythematosus (SLE). *J Okla State Med Assoc*. 2015 Nov; 108(11):492-499.
5. Brennan KA, Creaven AM. Living with invisible illness: social support experiences of individuals with systemic lupus erythematosus. *Qual Life Res*. 2016 May; 25(5):1227-1235.
6. Middleton KR, Haaz Moonaz S, Hasni SA, Magana Lopez M, Tatawa-Ayuketah G, Farmer N, et al. Yoga for systemic lupus erythematosus (SLE): Clinician experiences and qualitative perspectives from students and yoga instructors living with SLE. *Complementary Therapies in Medicine*. 2018 2018; 41:111-117.
7. Leung J, Ra J, Baker EA, Kim AHJ. "...Not Having the Real Support That We Need": Patients' Experiences with Ambiguity of Systemic Lupus Erythematosus and Erosion of Social Support. *ACR Open Rheumatol*. 2019 May; 1(3):135-144.
8. Sloan M, Bosley M, Blane M, Holloway L, Barrere C, D'Cruz D, et al. 'But you don't look sick': a qualitative analysis of the LUPUS UK online forum. *Rheumatol Int*. 2021 Apr; 41(4):721-732.
9. Joachim G, Acorn S. Life with a rare chronic disease: the scleroderma experience. *J Adv Nurs*. 2003 Jun; 42(6):598-606.
10. Willems LM, Redmond AC, Stamm TA, Boström C, Decuman S, Kennedy AT, et al. Content of non-pharmacological care for systemic sclerosis and educational needs of European health professionals: a EUSHNet survey. *Clin Exp Rheumatol*. 2015 Jul-Aug; 33(4 Suppl 91):S153-159.
11. Mouthon L, Alami S, Boisard AS, Chaigne B, Hachulla E, Poiraudeau S. Patients' views and needs about systemic sclerosis and its management: a qualitative interview study. *BMC Musculoskelet Disord*. 2017 May 30; 18(1):230.
12. Gumuchian ST, Peláez S, Delisle VC, Carrier ME, Jewett LR, El-Baalbaki G, et al. Understanding coping strategies among people living with scleroderma: a focus group study. *Disabil Rehabil*. 2018 Dec; 40(25):3012-3021.
13. Millette K, Thombs BD, Dewez S, Körner A, Peláez S. Scleroderma patient perspectives on social support from close social relationships. *Disabil Rehabil*. 2020 Jun; 42(11):1588-1598.
14. Pettersson H, Nordin A, Svenungsson E, Alexanderson H, Boström C. Experiences of physical activity and exercise in individuals with systemic sclerosis: A qualitative study. *Musculoskeletal Care*. 2020 Jun; 18(2):150-160.
15. van Leeuwen NM, Boonstra M, Huizinga TWJ, Kaptein AA, de Vries-Bouwstra JK. Illness perceptions, risk perceptions and worries in patients with early systemic sclerosis: A focus group study. *Musculoskeletal Care*. 2020 Jun; 18(2):177-186.
16. Harb S, Cumin J, Rice DB, Peláez S, Hudson M, Bartlett SJ, et al. Identifying barriers and facilitators to physical activity for people with scleroderma: a nominal group technique study. *Disabil Rehabil*. 2021 Nov; 43(23):3339-3346.
17. Lockwood C, Munn Z, Porritt K. Qualitative research synthesis: methodological guidance for systematic reviewers utilizing meta-aggregation. *Int J Evid Based Healthc*. 2015 Sep; 13(3):179-187.
18. Howick J, Chalmers I, Glasziou P, Greenhalgh T, Heneghan C, Liberati, et al. The Oxford Levels of Evidence 2. 2011 [cited; Available from: <https://www.cebm.ox.ac.uk/resources/levels-of-evidence/ocebml-levels-of-evidence>

## Supplemental Table S8

### CRITICAL APPRAISAL OF CASE SERIES (STUDY TYPE 4; N = 5)

| Reference/Questions* and LoE** | 1 | 2 | 3 | 4 | 5 | 6 | 7 | 8 | 9 | 10 | 11 | LoE |
|--------------------------------|---|---|---|---|---|---|---|---|---|----|----|-----|
| <b>SLE</b>                     |   |   |   |   |   |   |   |   |   |    |    |     |
| Horesh, 2017 [1]               | N | U | U | U | U | N | N | N | Y | /  | W  | 5   |
| <b>Ssc</b>                     |   |   |   |   |   |   |   |   |   |    |    |     |
| O'Connor, 2016 [2]             | Y | U | U | U | U | Y | Y | Y | Y | U  | I  | 4   |
| Onesti, 2016 [3]               | Y | U | U | Y | U | N | Y | Y | Y | U  | I  | 4   |
| Burillo-Martinez, 2017 [4]     | Y | U | U | U | Y | Y | N | Y | Y | /  | I  | 4   |
| Mirasoglu, 2017 [5]            | N | U | U | U | U | Y | Y | Y | Y | /  | I  | 4   |

\*Questions (according to the Joanna Briggs Institute critical appraisal tools [6]):

1. Were there clear criteria for inclusion in the case series?



2. Was the condition measured in a standard, reliable way for all participants included in the case series?
3. Were valid methods used for identification of the condition for all participants included in the case series?
4. Did the case series have consecutive inclusion of participants?
5. Did the case series have complete inclusion of participants?
6. Was there clear reporting of the demographics of the participants in the study?
7. Was there clear reporting of clinical information of the participants?
8. Were the outcomes or follow up results of cases clearly reported?
9. Was there clear reporting of the presenting site(s)/clinic(s) demographic information?
10. Was statistical analysis appropriate?
11. Overall appraisal?

**\*\*LoE: Levels of evidence according to the Oxford Centre for Evidence-Based Medicine [7]**

| Cell | Interpretation       |
|------|----------------------|
| Y/R  | Yes/robust           |
| N/W  | No/weak              |
| U/I  | Unclear/intermediate |
| /    | Not applicable       |

#### References:

1. Horesh D, Glick I, Taub R, Agmon-Levin N, Shoenfeld Y. Mindfulness-based group therapy for systemic lupus erythematosus: A first exploration of a promising mind-body intervention. *Complementary Therapies in Clinical Practice*. 2017 2017; 26:73-75.
2. O'Connor S, Durand MJ, Hudson M, Baron M, Gaudreault N. Effects of osteopathic manipulative treatment on hand function, disease symptoms and functional status in systemic sclerosis: a series of single-case studies in working women. *International Journal of Osteopathic Medicine*. 2016 2016; 22:21-32.
3. Onesti MG, Fioramonti P, Carella S, Fino P, Marchese C, Scuderi N. Improvement of Mouth Functional Disability in Systemic Sclerosis Patients over One Year in a Trial of Fat Transplantation versus Adipose-Derived Stromal Cells. *Stem Cells Int*. 2016; 2016:2416192.
4. Burillo-Martinez S, Prieto-Barríos M, Velasco-Tamariz V, Tous-Romero F, Lopez-Gomez S, Maronas-Jimenez L. Case series of pulsed dye laser treatment of telangiectasia in 23 patients with systemic sclerosis. *International Journal of Dermatology*. 2017 2017; 56(8):e165-e167.
5. Mirasoglu B, Bagli BS, Aktas S. Hyperbaric oxygen therapy for chronic ulcers in systemic sclerosis - case series. *International Journal of Dermatology*. 2017 2017; 56(6):636-640.
6. Munn Z, Barker TH, Moola S, Tufanaru C, Stern C, McArthur A, et al. Methodological quality of case series studies: an introduction to the JBI critical appraisal tool. *JBI Evid Synth*. 2020 Oct; 18(10):2127-2133.
7. Howick J, Chalmers I, Glasziou P, Greenhalgh T, Heneghan C, Liberati, et al. *The Oxford Levels of Evidence 2*. 2011 [cited; Available from: <https://www.cebm.ox.ac.uk/resources/levels-of-evidence/ocebml-levels-of-evidence>]

## Supplemental Table S9

### CRITICAL APPRAISAL OF COHORT STUDIES (STUDY TYPE 5; N = 5)

| Reference/Questions* and LoE** | 1 | 2 | 3 | 4 | 5 | 6 | 7 | 8 | 9 | 10 | 11 | 12 | LoE |
|--------------------------------|---|---|---|---|---|---|---|---|---|----|----|----|-----|
| <b>SLE</b>                     |   |   |   |   |   |   |   |   |   |    |    |    |     |
| Minami, 2003 [1]               | Y | Y | Y | Y | Y | Y | U | Y | Y | Y  | Y  | R  | 3   |
| Herzinger, 2004 [2]            | U | Y | / | N | N | U | N | Y | / | /  | U  | W  | 4   |
| Minami, 2011 [3]               | Y | Y | Y | Y | Y | Y | Y | Y | Y | Y  | Y  | R  | 3   |
| Patterson, 2021 [4]            | Y | Y | / | Y | Y | Y | Y | Y | U | U  | Y  | R  | 3   |

153

| SSc            |   |   |   |   |   |   |   |   |   |   |   |   |   |
|----------------|---|---|---|---|---|---|---|---|---|---|---|---|---|
| Azar, 2018 [5] | Y | Y | U | N | N | N | Y | Y | Y | Y | Y | I | 3 |

**\*Questions (according to the Joanna Briggs Institute critical appraisal tools [6]):**

1. Were the two groups similar and recruited from the same population?
2. Were the exposures measured similarly to assign people to both exposed and unexposed groups?
3. Was the exposure measured in a valid and reliable way?
4. Were confounding factors identified?
5. Were strategies to deal with confounding factors stated?
6. Were the groups/participants free of the outcome at the start of the study (or at the moment of exposure)?
7. Were the outcomes measured in a valid and reliable way?
8. Was the follow up time reported and sufficient to be long enough for outcomes to occur?
9. Was follow up complete, and if not, were the reasons to loss to follow up described and explored?
10. Were strategies to address incomplete follow up utilized?
11. Was appropriate statistical analysis used?
12. Overall appraisal?

**\*\*LoE: Levels of evidence according to the Oxford Centre for Evidence-Based Medicine [7]**

| Cell | Interpretation       |
|------|----------------------|
| Y/R  | Yes/robust           |
| N/W  | No/weak              |
| U/I  | Unclear/intermediate |
| /    | Not applicable       |

**References:**

1. Minami Y, Sasaki T, Arai Y, Kurisu Y, Hisamichi S. Diet and systemic lupus erythematosus: a 4 year prospective study of Japanese patients. *Journal of Rheumatology*. 2003 2003; 30(4):747-754.
2. Herzinger T, Plewig G, Rocken M. Use of sunscreens to protect against ultraviolet-induced lupus erythematosus. *Arthritis & Rheumatism*. 2004 2004; 50(9):3045-3046.
3. Minami Y, Hirabayashi Y, Nagata C, Ishii T, Harigae H, Sasaki T. Intakes of vitamin B6 and dietary fiber and clinical course of systemic lupus erythematosus: a prospective study of Japanese female patients. *Journal of Epidemiology*. 2011 2011; 21(4):246-254.
4. Patterson SL, Trupin L, Yazdany J, Dall'Erà M, Lanata C, Dequattro K, et al. Physical Inactivity Independently Predicts Incident Depression in a Multi-Racial/Ethnic Systemic Lupus Cohort. *Arthritis care & research*. 2021 2021; 9:09.
5. Azar M, Rice DB, Kwakkenbos L, Carrier ME, Shrier I, Bartlett SJ, et al. Exercise habits and factors associated with exercise in systemic sclerosis: a Scleroderma Patient-centered Intervention Network (SPIN) cohort study. *Disability & Rehabilitation*. 2018 2018; 40(17):1997-2003.
6. Moola S, Munn Z, Tufanaru C, Aromataris E, Sears K, Sfetcu R, et al. Chapter 7: Systematic reviews of etiology and risk. 2020 [cited 2022 28 Feb]; Available from: <https://synthesismanual.jbi.global>
7. Howick J, Chalmers I, Glasziou P, Greenhalgh T, Heneghan C, Liberati, et al. The Oxford Levels of Evidence 2. 2011 [cited; Available from: <https://www.cebm.ox.ac.uk/resources/levels-of-evidence/ocebml-levels-of-evidence>

## Supplemental Table S10

### CRITICAL APPRAISAL OF META-ANALYSES, WITH OR WITHOUT SYSTEMATIC REVIEWS (STUDY TYPE 12; N = 5)

| Reference/Questions* and LoE** | 1 | 2 | 3 | 4 | 5 | 6 | 7 | 8 | 9 | 10 | 11 | 12 | LoE |
|--------------------------------|---|---|---|---|---|---|---|---|---|----|----|----|-----|
| SLE                            |   |   |   |   |   |   |   |   |   |    |    |    |     |
| Zhang, 2012 [1]                | Y | Y | Y | Y | Y | U | Y | Y | Y | Y  | Y  | R  | 1   |
| Liang, 2014 [2]                | Y | Y | Y | Y | Y | Y | Y | Y | Y | Y  | Y  | R  | 1   |
| O'Dwyer, 2017 [3]              | Y | Y | Y | Y | Y | Y | Y | Y | U | Y  | Y  | R  | 1   |
| Wu, 2017 [4]                   | Y | Y | Y | Y | Y | Y | Y | Y | Y | Y  | Y  | R  | 1   |
| da Hora, 2019 [5]              | Y | Y | Y | N | Y | U | Y | Y | Y | Y  | Y  | R  | 3   |

**\*Questions (according to the Joanna Briggs Institute critical appraisal tools [6]):**

1. Is the review question clearly and explicitly stated?
2. Were the inclusion criteria appropriate for the review question?
3. Was the search strategy appropriate?
4. Were the sources and resources used to search for studies adequate?
5. Were the criteria for appraising studies appropriate?
6. Was critical appraisal conducted by two or more reviewers independently?
7. Were there methods to minimize errors in data extraction?
8. Were the methods used to combine studies appropriate?
9. Was the likelihood of publication bias assessed?
10. Were recommendations for policy and/or practice supported by the reported data?
11. Were the specific directives for new research appropriate?
12. Overall appraisal?

**\*\*LoE: Levels of evidence according to the Oxford Centre for Evidence-Based Medicine [7]**

| Cell | Interpretation       |
|------|----------------------|
| Y/R  | Yes/robust           |
| N/W  | No/weak              |
| U/I  | Unclear/intermediate |
| /    | Not applicable       |

**References:**

1. Zhang J, Wei W, Wang CM. Effects of psychological interventions for patients with systemic lupus erythematosus: a systematic review and meta-analysis. *Lupus*. 2012 2012; 21(10):1077-1087.
2. Liang H, Tian X, Cao LY, Chen YY, Wang CM. Effect of psychological intervention on healthrelated quality of life in people with systemic lupus erythematosus: A systematic review. *International Journal of Nursing Sciences*. 2014 2014; 1(3):298-305.
3. O'Dwyer T, Durcan L, Wilson F. Exercise and physical activity in systemic lupus erythematosus: A systematic review with meta-analyses. *Seminars in Arthritis & Rheumatism*. 2017 2017; 47(2):204-215.
4. Wu ML, Yu KH, Tsai JC. The Effectiveness of Exercise in Adults With Systemic Lupus Erythematosus: A Systematic Review and Meta-Analysis to Guide Evidence-Based Practice. *Worldviews on Evidence-Based Nursing*. 2017 2017; 14(4):306-315.
5. da Hora TC, Lima K, Maciel R. The effect of therapies on the quality of life of patients with systemic lupus erythematosus: a meta-analysis of randomized trials. *Advances in Rheumatology*. 2019 2019; 59(1):34.
6. Aromataris E, Fernandez R, Godfrey CM, Holly C, Khalil H, Tungpunkom P. Summarizing systematic reviews: methodological development, conduct and reporting of an umbrella review approach. *Int J Evid Based Healthc*. 2015 Sep; 13(3):132-140.
7. Howick J, Chalmers I, Glasziou P, Greenhalgh T, Heneghan C, Liberati, et al. The Oxford Levels of Evidence 2. 2011 [cited; Available from: <https://www.cebm.ox.ac.uk/resources/levels-of-evidence/ocebml-levels-of-evidence>

## Supplemental Table S11

## CRITICAL APPRAISAL OF CASE-CONTROL STUDIES (STUDY TYPE 2; N = 3)

| Reference/Questions* and LoE** | 1 | 2 | 3 | 4 | 5 | 6 | 7 | 8 | 9 | 10 | 11 | LoE |
|--------------------------------|---|---|---|---|---|---|---|---|---|----|----|-----|
| <b>SLE</b>                     |   |   |   |   |   |   |   |   |   |    |    |     |
| Squance, 2015 [1]              | Y | U | U | / | Y | U | U | / | Y | Y  | I  | 4   |
| <b>Ssc</b>                     |   |   |   |   |   |   |   |   |   |    |    |     |
| Collins, 2016 [2]              | N | Y | N | Y | Y | Y | Y | Y | Y | Y  | R  | 4   |
| Giuggioli, 2020 [3]            | U | U | Y | Y | Y | N | N | Y | Y | Y  | I  | 4   |

**\*Questions (according to the Joanna Briggs Institute critical appraisal tools [4]):**

1. Were the groups comparable other than the presence of disease in cases or the absence of disease in controls?
2. Were cases and controls matched appropriately?
3. Were the same criteria used for identification of cases and controls?
4. Was exposure measured in a standard, valid and reliable way?
5. Was exposure measured in the same way for cases and controls?
6. Were confounding factors identified?
7. Were strategies to deal with confounding factors stated?
8. Were outcomes assessed in a standard, valid and reliable way for cases and controls?
9. Was the exposure period of interest long enough to be meaningful?
10. Was appropriate statistical analysis used?
11. Overall appraisal?

**\*\*LoE: Levels of evidence according to the Oxford Centre for Evidence-Based Medicine [5]**

| Cell | Interpretation       |
|------|----------------------|
| Y/R  | Yes/robust           |
| N/W  | No/weak              |
| U/I  | Unclear/intermediate |
| /    | Not applicable       |

**References:**

1. Squance ML, Reeves G, Attia J, Bridgman H, Guest M. Self-reported Lupus flare: Association with everyday home and personal product exposure. *Toxicology Reports*. 2015 2015; 2:880-888.
2. Collins J, Mazor Y, Jones M, Kellow J, Malcolm A. Efficacy of anorectal biofeedback in scleroderma patients with fecal incontinence: a case-control study. *Scandinavian Journal of Gastroenterology*. 2016 2016; 51(12):1433-1438.

3. Giuggioli D, Lumetti F, Spinella A, Cocchiara E, Sighinolfi G, Citriniti G, et al. Use of Neem oil and Hypericum perforatum for treatment of calcinosis-related skin ulcers in systemic sclerosis. *Journal of International Medical Research*. 2020 2020; 48(4):300060519882176.
4. Moola S, Munn Z, Tufanaru C, Aromataris E, Sears K, Sfetcu R, et al. Chapter 7: Systematic reviews of etiology and risk. 2020 [cited 2022 28 Feb]; Available from: <https://synthesismanual.jbi.global>
5. Howick J, Chalmers I, Glasziou P, Greenhalgh T, Heneghan C, Liberati, et al. *The Oxford Levels of Evidence 2*. 2011 [cited; Available from: <https://www.cebm.ox.ac.uk/resources/levels-of-evidence/ocebmllevels-of-evidence>
